# Supplementary material for: The importance of sponges and mangroves in supporting fish communities on degraded coral reefs in Caribbean Panama
Source: PeerJ. 2018 Mar 29;6:e4455. doi: 10.7717/peerj.4455 (PMC5878927; doi:10.7717/peerj.4455)
Supplement: Supplemental Information 1 — Fish abundance, log transformed, fish > 12.5 excluded, factor analyses. [file peerj-06-4455-s001.xlsx]

## Sheet: Fish abundance log >12.5cm
Site	Type	Fish Species	Total Count	Abudefduf saxatilis	Acanthurus bahianus	Acanthurus chirurgus	Acanthurus coeruleus	Anisotremus virginicus	Apogon townsendi	Aulostomus maculatus	Bodianus rufus	Canthigaster rostrata	Carangoides ruber	Caranx crysos	Caranx latus	Cephalopholis cruentata	Chaetodipterus faber	Chaetodon capistratus	Chaetodon ocellatus	Chaetodon striatus	Chromis multilineata	Coryphopterus glaucofraenum	Coryphopterus personatus	Dasyatis americana	Diodon hystrix	Echeneis neucratoides	Elacatinus xanthiprora	Equetus punctatus	Eucinostomus melanopterus	Ginglymostoma cirratum	Gymnothorax funebris	Haemulon aurolineatum	Haemulon carbonarium	Haemulon flavolineatum	Haemulon macrostomum	Haemulon plumierii	Haemulon sciurus	Haemulon striatum	Halichoeres bivittatus	Holacanthus ciliaris	Holocentrus rufus	Hypoplectrus nigricans	Hypoplectrus puella	Hypoplectrus unicolor	Jenkinsia lamprotaenia	Lucayablennius zingaro	Lutjanus analis	Lutjanus apodus	Lutjanus griseus
Almirante Seagrass	Seagrass	Ablennes hians	0	0	0	0	0	0	0	0	0	0	0	0	0	0	0	0	0	0	0	0	0	0	0	0	0	0	0	0	0	0	0	0	0	0	0	0	1.19033	0	0	0	0.176091	0	2	0	0	0	0
Almirante Mangrove	Mangrove	Ablennes hians	0.39794	0.30103	0	0	0	0	0	0	0	0	1.77815	0	0	0	0	0.30103	0	0	0	0	0	0	0	0	0	0	0	0	0	0	0	1.07918	0	1.36173	0	0	0.30103	0	0	0	0	0	4.77815	0	0	1.20412	0
Almirante Reef	Reef	Ablennes hians	0	0.243038	0.30103	1.39794	0	0	0	0	0	0	1.14613	0	0	0.30103	0	0.579784	0	0	0	0.823909	2.49762	0	0	0	0.176091	0	0	0	0	0	0	0.352183	1.17609	0.176091	0	0	1.24715	0	0	0	0.765917	0	0	0	0	0	0
Casa Blanca Seagrass	Seagrass	Ablennes hians	0	0	0	0	0	0	0	0	0	0	0	0	0	0	0	0	0	0	0	0	0	0	0	0	0	0	0	0	0	0	0	0	0	0	0	0	1.65801	0	0	0	0	0	3.51188	0	0	0	0
Casa Blanca Mangrove	Mangrove	Ablennes hians	0	0	0	0	0	0.60206	0	0	0	0	0	0.477121	0	0	0	0.39794	0	0	0	0.90309	0	0	0	0	0	0	0.740363	0	0	0	0	0	0	0	0	0	1.63849	0	0	0	0	0	2.88649	0	0	1.09691	0
Casa Blanca Reef	Reef	Ablennes hians	0	0.60206	0.30103	0	0	0	0	0	0	0	0	0	0	0.30103	0	0.845098	0	0.30103	0	0.579784	2.87506	0	0	0	0	0	0	0	0	0	0	1.41497	0	0	0	0	1.0607	0	0	0.176091	0.676694	0	0	0	0	0	0
Coral Cay Seagrass	Seagrass	Ablennes hians	0	0	0	0	0	0	0.477121	0	0	0	0	0	0	0	0	0.778151	0	0	0	0	0	0	0	0	0	0	0	0	0	0	0	0.30103	0	0	0	0	0.653213	0	0	0	0	0	3.39794	0	0	0	0
Coral Cay Mangrove	Mangrove	Ablennes hians	0	0	0	0	0	0	0	0	0	0	0	0	0	0	0	0.90309	0	0	0	0	0	0	0	0	0	0	0	0	0	0	0	1	0	0	0	0	0.477121	0	0	0	0	0	3.30103	0	0	0.30103	0
Coral Cay Reef	Reef	Ablennes hians	0	0	0	0	0.30103	0	0	0	0	0.636822	0	0	0	0	0	0.531479	0	0	0	0	0	0	0	0	0	0	0	0	0	0	0	0.60206	0	0	0.477121	0	0	0	0	0	0.176091	0	0	0	0	0	0
Juan Point Seagrass	Seagrass	Ablennes hians	0	0	0	0	0	0	0	0	0	0	0	0	0	0	0	0.477121	0	0	0	0	0	0	0	0	0	0	0	0	0	0	0	1.02119	0	0	0	0	1.16137	0	0	0	0.176091	0	3.17609	0	0	0	0
Juan Point Mangroves	Mangrove	Ablennes hians	0	0.477121	0	0	0	0	0	0	0	0	0	0	0	0	0	0	0	0	0	0.477121	0	0	0	0	0	0	0	0	0	0	0	0.60206	0	0	0	0	0.30103	0	0	0	0	0	4	0	0	0	0
Juan Point Reef	Reef	Ablennes hians	0	0.564271	0.221849	0	0	0.30103	0	0	0	0.09691	0	0	0	0.09691	0	0.925754	0	0	0	0	3.03514	0	0	0	0	0	0	0	0	0	0	1.17246	0	0.69897	0.146128	0	0.653213	0	0	0.335792	0.375664	0	0	0	0	0.30103	0.477121
Hospital Point Reef	Reef	Ablennes hians	0	0	0	0	0	0	0.30103	0	0	0.221849	0	0	0	0	0	0.221849	0	0	0	0	0	0	0	0	0	0	0	0	0	0	0	0.439333	0	0	0	0	0.30103	0	0	0	0.30103	0	0	0	0	0	0
Popa Seagrass	Seagrass	Ablennes hians	0	0	0.740363	0	0	0	0	0	0	0.69897	0	0	0	0	0	0.477121	0	0	0	0	0	0	0	0	0	0	0	0	0	0	0	0.30103	0	0	0	0	0.740363	0	0	0	0	0	0	0	0	0	0
Popa Reef	Reef	Ablennes hians	0	0	0.176091	0	0.30103	0	0	0	0	1.35793	0.477121	0	0	0	0	0.30103	0	0	0	0	0	0	0	0	0	0	0	0	0	0	0	0.367977	0	0	0	0	0.643453	0	0	0	0.342423	0	0	0	0	0	0
Punta Caracol Seagrass	Seagrass	Ablennes hians	0	0	0	0	0	0	0	0	0	0	0	0	0	0	0	0	0	0	0	0	0	0	0	0	0	0	0	0	0	0	0	1.14613	0	0	0	0	1.62839	0	0	0	0	0	0	0	0	0	0
Punta Caracol Mangrove	Mangrove	Ablennes hians	0	0.30103	0	0.778151	0	0	0	0	0	0	0.30103	0.30103	0	0	0	0.845098	0	0	0	0	0	0	0	0	0	0	0	0	0	0	0	0.812913	0	0.740363	0	0	1.35218	0	0	0	0	0	2.8451	0	0	1.68723	0
Punta Caracol Reef	Reef	Ablennes hians	0	0.367977	0.579784	0	0.30103	0	0	0	0	0.367977	1.04139	0	0	0.30103	0	0.69897	0.176091	0	0	0.30103	2.69839	0	0	0	0	0.39794	0	0	0	0	0	0	0	0.477121	1.11394	0	0.69897	0	0	0	0.544068	0	0	0	0	0	0
Salt Creek Seagrass	Seagrass	Ablennes hians	0	0	0	0	0	0	0	0	0	0	0	0	0.39794	0	0	0	0	0	0	0	0	0	0	0	0	0	1.47712	0	0	0	0	0	0	1.30103	0	0	0	0	0	0	0	0	0	0	0	0	0
Salt Creek Reef	Reef	Ablennes hians	0	0	0	0	0	0	0	0	0	1.16137	0	0	0	0	0	0.477121	0.30103	0	0	0	0	0	0	0	0	0	0	0	0	0	0	0	0	0	0	0	0.425969	0	0	0	0.30103	0	0	0	0	0	0
Stri Point Seagrass	Seagrass	Ablennes hians	0	0	0	0	0	0	0.69897	0	0	0	0	0	0	0	0	0.477121	0	0	0	0	0.30103	0	0	0	0	0	0	0	0	0	0	1.5682	0	0	0	0	1.18564	0	0	0	0	0	3.54818	0	0	0	0
Stri Point Mangrove	Mangrove	Ablennes hians	0.60206	0.69897	0	0	0	0	0	0	0	0	0.30103	0	0	0	0	0.653213	0	0	0	0	0	0	0	0	0	0	0.60206	0	0	0	0	1	0	0	0	0	1.20412	0	0	0	0	0	3.31175	0	0	1.04139	0
Stri Point Reef	Reef	Ablennes hians	0	0.342423	0	0	0	0	0	0	0	0.20412	0.124939	0	0	0.09691	0.176091	0.583577	0	0	0	0	3.51726	0	0	0	0	0	0	0	0	0	0	1.13263	0	1.14613	0.69897	0	0.69897	0.30103	0	0.720159	0.935759	0.124939	0	0	0	0	0
[truncated: 30 more columns]

## Sheet: PCA factors
Secies	Factor1	Factor2
Abudefduf saxatilis	0.550786	0.192272
Acanthurus bahianus	0.318319	-0.191671
Acanthurus chirurgus	0.380001	0.422751
Acanthurus coeruleus	0.0325438	-0.56179
Anisotremus virginicus	0.0811754	0.54993
Apogon townsendi	-0.242537	-0.00184466
Canthigaster rostrata	-0.0865953	-0.653488
Carangoides ruber	0.226478	0.0585495
Caranx crysos	-0.0374854	0.729518
Caranx latus	-0.179073	-0.0145192
Cephalopholis cruentata	0.76114	-0.0369805
Chaetodipterus faber	0.622467	-0.173111
Chaetodon capistratus	0.473761	0.153098
Chaetodon ocellatus	0.00778911	-0.389149
Chaetodon striatus	0.350469	0.0096616
Coryphopterus glaucofraenum	0.363126	0.498567
Coryphopterus personatus	0.950023	-0.0951589
Elacatinus xanthiprora	0.409011	0.24297
Equetus punctatus	0.204216	-0.271849
Eucinostomus melanopterus	-0.218282	0.300284
Haemulon flavolineatum	0.274762	0.105111
Haemulon macrostomum	0.409011	0.24297
Haemulon plumierii	0.336809	0.0699514
Haemulon sciurus	0.505642	-0.414354
Halichoeres bivittatus	0.079481	0.529648
Holacanthus ciliaris	0.622467	-0.173111
Hypoplectrus nigricans	0.775338	-0.137727
Hypoplectrus puella	0.892537	-0.30167
Hypoplectrus unicolor	0.622467	-0.173111
Jenkinsia lamprotaenia	-0.453618	0.501012
Lutjanus apodus	-0.0780897	0.692585
Lutjanus griseus	0.304462	0.0423301
Lutjanus jocu	-0.0631322	0.725624
Lutjanus mahogoni	-0.160905	0.0460945
Lutjanus synagris	-0.242331	0.0125773
Malacoctenus triangulatus	0.105553	0.641688
Microspathodon chrysurus	-0.19342	-0.586098
Odontoscion dentex	0.304462	0.0423301
Platybelone araglus	-0.0631393	0.582393
Pomacanthus arcuatus	0.204216	-0.271849
Pseudupeneus maculatus	0.622467	-0.173111
Scarus iseri	0.428217	0.0588898
Scomberomorus regalis	0.716455	-0.00541717
Serranus tigrinus	0.471851	-0.145184
Serranus tortugarum	0.770666	-0.0162062
Sparisoma aurofrenatum	-0.0920512	-0.460926
Sparisoma viride	0.327565	0.0674741
Sphyraena barracuda	-0.00498038	0.666258
Stegastes adustus	0.243296	-0.508441
Stegastes diencaeus	0.409011	0.24297
Stegastes partitus	0.708433	-0.424844
Stegastes planifrons	0.485258	-0.547816
Stegastes variabilis	0.217983	0.364324
Thalassoma bifasciatum	0.020999	-0.574185
