# Supplementary material for: The importance of sponges and mangroves in supporting fish communities on degraded coral reefs in Caribbean Panama
Source: PeerJ. 2018 Mar 29;6:e4455. doi: 10.7717/peerj.4455 (PMC5878927; doi:10.7717/peerj.4455)
Supplement: Supplemental Information 3 [file peerj-06-4455-s003.xlsx]

## Sheet: Corr Prob Env Fish metrics
	Hard coral reef	Hard coral bleached	Recently killed coral	Anemone	Soft coral reef	Sponges	Worms	Zoanthid	Rubble	Sand reef	Rock	Calcifying algae reef	Macroalgae reef	Soft Substrate	Hard substrate	Thalassia	Syringodium	Sand seagrass	Hard coral seagrass	Soft coral seagrass	Sponge seagrass	Macroalgae seagrass	Calcifying algae seagrass	Seagrass Biomass (g/m2)	Distance Reef-Mangrove (m)	Temp °C reef	Sal psu reef	TDS mg/L reef	ODO mg/L reef	pH reef	Turbidity FNU reef	Chlorophyll µg/L reef	BGA-PE µg/L reef	fDOM RFU reef	Reef Biodiversity M1	Reef Biodiversity M2	Mangrove Biodiversity M1	Mangrove M2	SeagrassBiodiversity M1	Seagrass M2	Trophic level (Fish Base)	Trophic level Avg all species	Vulnerability (Fish Base)	Vulnerability (Fish Base)/10	Resilience high (No of species)	Resilience medium	Resilience low	Resilience very low	Resilience high %
Live coral cover reef	<.0001	0.3977	0.3576	0.6196	0.7318	0.3847	0.1212	0.2305	0.2308	0.3455	0.0223	0.7434	0.4974	0.0437	0.0437	0.0063	0.7648	0.4935	0.8363	0.7835	0.2114	0.8396	0.3475	0.3204	0.2454	0.3403	0.6544	0.6494	0.8636	0.5343	0.5512	0.5779	0.8675	0.6704	0.3028	0.3486	0.2932	0.6204	0.052	0.0578	0.2601	0.9898	0.343	0.343	0.2606	0.4296	0.7437	0.3381	0.9377
Hard coral bleached	0.3977	<.0001	0.922	0.3609	0.494	0.301	0.0332	0.0099	0.0047	0.0242	0.7424	0.5572	0.4639	0.0551	0.0552	0.8199	0.6359	0.6244	0.0649	0.4726	0.1035	0.592	0.5576	0.7008	0.3953	0.8631	0.4602	0.4596	0.0661	0.288	0.995	0.7902	0.8643	0.8042	0.6404	0.3313	0.522	0.936	0.9143	0.8185	0.4815	0.9398	0.7694	0.7694	0.4378	0.8647	0.9353	0.7087	0.6007
Recently dead corals	0.3576	0.922	<.0001	0.0779	0.9709	0.7784	0.8279	0.4276	0.7479	0.4699	0.2485	0.5841	0.9201	0.8069	0.807	0.9533	0.2552	0.4472	0.433	0.7131	0.3679	0.4594	0.3908	0.2974	0.3086	0.7466	0.7371	0.7371	0.1884	0.0702	0.7782	0.3759	0.188	0.6697	0.2873	0.3676	0.259	0.3949	0.9154	0.7487	0.4749	0.4593	0.4171	0.4171	0.2541	0.3569	0.8049	0.5804	0.8106
Anemone	0.6196	0.3609	0.0779	<.0001	0.4157	0.3531	0.8719	0.9623	0.2949	0.4557	0.189	0.4593	0.3483	0.5861	0.5862	0.9317	0.548	0.6579	0.0076	0.5414	0.8747	0.6719	0.7072	0.0565	0.5442	0.8497	0.2471	0.2464	0.0025	0.0694	0.6796	0.0959	0.1042	0.991	0.6229	0.6619	0.8458	0.9623	0.8086	0.7778	0.5946	0.078	0.6772	0.6772	0.8749	0.49	0.4531	0.6362	0.4741
Soft coral reef	0.7318	0.494	0.9709	0.4157	<.0001	0.0993	0.7717	0.5637	0.336	0.3916	0.9624	0.0006	0.1019	0.5257	0.5253	0.7629	0.0929	0.6248	0.3587	0.8748	0.3913	0.883	0.7162	0.7404	0.1229	0.9728	0.3404	0.3422	0.4448	0.8621	0.001	0.3529	0.5758	0.0126	0.3405	0.1134	0.1074	0.1574	0.7014	0.4982	0.2374	0.2853	0.3219	0.3219	0.4113	0.432	0.393	0.5914	0.6935
Sponges	0.3847	0.301	0.7784	0.3531	0.0993	<.0001	0.4363	0.7117	0.278	0.2073	0.5971	0.1258	0.0576	0.4484	0.4487	0.2216	0.2246	0.3137	0.2503	0.317	0.5404	0.559	0.7314	0.1482	0.0164	0.5	0.454	0.4487	0.1814	0.7173	0.3325	0.0255	0.9327	0.1025	0.0495	0.0036	0.0229	0.0729	0.3591	0.0369	0.0003	0.0937	0.0025	0.0025	0.0587	0.1022	0.385	0.305	0.7362
Worms	0.1212	0.0332	0.8279	0.8719	0.7717	0.4363	<.0001	0.0776	0.1603	0.2592	0.4318	0.9291	0.6861	0.1431	0.1432	0.3779	0.6073	0.7626	0.5979	0.5617	0.3162	0.4851	0.8253	0.9165	0.7608	0.8027	0.9062	0.9057	0.528	0.5457	0.7251	0.9506	0.4689	0.7804	0.8601	0.3868	0.5756	0.6452	0.392	0.3948	0.5034	0.9385	0.8244	0.8244	0.377	0.5276	0.9051	0.4851	0.0953
Zoanthid	0.2305	0.0099	0.4276	0.9623	0.5637	0.7117	0.0776	<.0001	0.0037	0.0606	0.706	0.525	0.7942	0.1356	0.1356	0.8704	0.5953	0.9437	0.3163	0.8751	0.0145	0.8217	0.0509	0.902	0.4016	0.9986	0.8757	0.8758	0.4287	0.4402	0.809	0.6884	0.9329	0.7512	0.8021	0.6122	0.581	0.932	0.8486	1	0.8807	0.4587	0.8471	0.8471	0.7017	0.8387	0.9191	0.6754	0.9496
Rubble	0.2308	0.0047	0.7479	0.2949	0.336	0.278	0.1603	0.0037	<.0001	0.0176	0.8556	0.2772	0.8306	0.0729	0.073	0.5808	0.314	0.6084	0.0388	0.9448	0.0177	0.8789	0.1338	0.3813	0.123	0.9159	0.6606	0.6591	0.0792	0.1841	0.6182	0.6005	0.6053	0.9069	0.3526	0.2943	0.3095	0.6829	0.7793	0.5571	0.4205	0.7735	0.641	0.641	0.4058	0.3482	0.5986	0.8304	0.63
Sand reef	0.3455	0.0242	0.4699	0.4557	0.3916	0.2073	0.2592	0.0606	0.0176	<.0001	0.8864	0.2862	0.3964	0.0637	0.0638	0.7353	0.311	0.1732	0.0312	0.7213	0.0075	0.4316	0.5259	0.6666	0.0503	0.4336	0.6272	0.6218	0.2181	0.587	0.602	0.5901	0.8521	0.8044	0.0824	0.066	0.0673	0.4474	0.5597	0.5455	0.2096	0.6997	0.3284	0.3284	0.0782	0.2013	0.1629	0.6703	0.8477
Rock	0.0223	0.7424	0.2485	0.189	0.9624	0.5971	0.4318	0.706	0.8556	0.8864	<.0001	0.9836	0.4245	0.7605	0.7605	0.0512	0.8696	0.7682	0.3557	0.5939	0.6048	0.7036	0.356	0.6692	0.4152	0.5506	0.5064	0.509	0.3536	0.8474	0.8842	0.8448	0.5106	0.7554	0.4792	0.5172	0.3434	0.4763	0.1768	0.0619	0.4078	0.9817	0.4234	0.4234	0.4556	0.6208	0.8535	0.0622	0.8785
Calcifying algae reef	0.7434	0.5572	0.5841	0.4593	0.0006	0.1258	0.9291	0.525	0.2772	0.2862	0.9836	<.0001	0.1471	0.5757	0.5753	0.6608	0.0076	0.9506	0.3393	0.9974	0.3029	0.6294	0.5436	0.7954	0.0523	0.953	0.464	0.4652	0.5535	0.8662	0.0008	0.4725	0.5986	0.0282	0.1678	0.0933	0.0685	0.1168	0.6258	0.5535	0.2084	0.2917	0.2426	0.2426	0.2952	0.1763	0.2625	0.6443	0.371
Macroalgae reef	0.4974	0.4639	0.9201	0.3483	0.1019	0.0576	0.6861	0.7942	0.8306	0.3964	0.4245	0.1471	<.0001	0.8367	0.8365	0.6961	0.2572	0.6571	0.3528	0.2093	0.8893	0.4657	0.1299	0.8415	0.3522	0.7662	0.6564	0.655	0.3754	0.6439	0.2855	0.3432	0.4764	0.1061	0.2607	0.0522	0.1885	0.5098	0.9868	0.5377	0.0867	0.1149	0.1191	0.1191	0.139	0.6475	0.3893	0.5659	0.5353
Soft Substrate	0.0437	0.0551	0.8069	0.5861	0.5257	0.4484	0.1431	0.1356	0.0729	0.0637	0.7605	0.5757	0.8367	<.0001	<.0001	0.1339	0.7808	0.1101	0.1592	0.8947	0.1628	0.9418	0.6533	0.2867	0.3709	0.3977	0.1074	0.1055	0.1853	0.2245	0.2386	0.5194	0.3079	0.2825	0.4041	0.4579	0.5535	0.9863	0.1819	0.4201	0.4108	0.9796	0.5473	0.5473	0.3545	0.4744	0.7487	0.7389	0.9779
Hard substrate	0.0437	0.0552	0.807	0.5862	0.5253	0.4487	0.1432	0.1356	0.073	0.0638	0.7605	0.5753	0.8365	<.0001	<.0001	0.1339	0.7804	0.1101	0.1593	0.8947	0.163	0.9417	0.6534	0.2868	0.3712	0.3977	0.1074	0.1054	0.1854	0.2245	0.2383	0.5195	0.3078	0.2823	0.4044	0.4582	0.5538	0.9866	0.1819	0.4202	0.411	0.9798	0.5475	0.5475	0.3547	0.4747	0.7489	0.7388	0.9777
Seagrass	0.0063	0.8199	0.9533	0.9317	0.7629	0.2216	0.3779	0.8704	0.5808	0.7353	0.0512	0.6608	0.6961	0.1339	0.1339	<.0001	0.5856	0.461	0.7918	0.9811	0.6798	0.8737	0.8576	0.0464	0.2855	0.2333	0.4253	0.4196	0.6151	0.3213	0.5536	0.1152	0.4558	0.892	0.3049	0.3663	0.3521	0.4723	0.009	0.0092	0.1551	0.452	0.1769	0.1769	0.352	0.3465	0.6808	0.2386	0.7377
Syringodium	0.7648	0.6359	0.2552	0.548	0.0929	0.2246	0.6073	0.5953	0.314	0.311	0.8696	0.0076	0.2572	0.7808	0.7804	0.5856	<.0001	0.5244	0.4315	0.7632	0.4682	0.732	0.5711	0.8668	0.0688	0.7421	0.9434	0.9451	0.6707	0.509	0.0754	0.7214	0.7187	0.2079	0.1161	0.1646	0.1534	0.2094	0.5277	0.7303	0.2254	0.3676	0.1987	0.1987	0.2687	0.0659	0.3533	0.73	0.1943
Sand seagrass	0.4935	0.6244	0.4472	0.6579	0.6248	0.3137	0.7626	0.9437	0.6084	0.1732	0.7682	0.9506	0.6571	0.1101	0.1101	0.461	0.5244	<.0001	0.3595	0.8851	0.5527	0.7894	0.7658	0.4639	0.1821	0.1502	0.057	0.0551	0.4908	0.9697	0.5312	0.3262	0.2951	0.9409	0.1244	0.2821	0.3209	0.287	0.4881	0.6018	0.1941	0.7346	0.1332	0.1332	0.2435	0.0542	0.4769	0.5629	0.3753
Hard coral seagrass	0.8363	0.0649	0.433	0.0076	0.3587	0.2503	0.5979	0.3163	0.0388	0.0312	0.3557	0.3393	0.3528	0.1592	0.1593	0.7918	0.4315	0.3595	<.0001	0.957	0.1715	0.8094	0.8725	0.1374	0.1945	0.779	0.3277	0.325	0.0048	0.0928	0.6289	0.1911	0.2246	0.9753	0.256	0.2766	0.3504	0.7801	0.5756	0.6338	0.3866	0.1981	0.5307	0.5307	0.3688	0.2976	0.1859	0.5376	0.589
Soft coral seagrass	0.7835	0.4726	0.7131	0.5414	0.8748	0.317	0.5617	0.8751	0.9448	0.7213	0.5939	0.9974	0.2093	0.8947	0.8947	0.9811	0.7632	0.8851	0.957	<.0001	0.2133	0.0003	0.25	0.7173	0.7943	0.2523	0.1428	0.1452	0.3372	0.9512	0.6115	0.6236	0.9185	0.8977	0.7591	0.7882	0.6895	0.7747	0.7005	0.8665	0.4679	0.5477	0.526	0.526	0.9852	0.735	0.2494	0.5733	0.4771
Sponge seagrass	0.2114	0.1035	0.3679	0.8747	0.3913	0.5404	0.3162	0.0145	0.0177	0.0075	0.6048	0.3029	0.8893	0.1628	0.163	0.6798	0.4682	0.5527	0.1715	0.2133	<.0001	0.1372	0.0643	0.8568	0.0864	0.3047	0.6451	0.6509	0.5468	0.4736	0.4226	0.8865	0.8804	0.8312	0.247	0.2681	0.1325	0.384	0.7	0.6599	0.5722	0.7774	0.739	0.739	0.3191	0.2906	0.2867	0.6227	0.585
Macroalgae seagrass	0.8396	0.592	0.4594	0.6719	0.883	0.559	0.4851	0.8217	0.8789	0.4316	0.7036	0.6294	0.4657	0.9418	0.9417	0.8737	0.732	0.7894	0.8094	0.0003	0.1372	<.0001	0.2888	0.7438	0.4469	0.2672	0.2322	0.2353	0.4148	0.8175	0.4078	0.7128	0.9783	0.8819	0.3731	0.8169	0.3719	0.5565	0.7243	0.9782	0.792	0.7929	0.8784	0.8784	0.6236	0.3875	0.0912	0.635	0.3417
Calcifying algae seagrass	0.3475	0.5576	0.3908	0.7072	0.7162	0.7314	0.8253	0.0509	0.1338	0.5259	0.356	0.5436	0.1299	0.6533	0.6534	0.8576	0.5711	0.7658	0.8725	0.25	0.0643	0.2888	<.0001	0.9411	0.4964	0.7048	0.3523	0.3527	0.9549	0.5287	0.5492	0.6368	0.7528	0.8468	0.9753	0.7757	0.852	0.6021	0.6457	0.862	0.6268	0.2833	0.5656	0.5656	0.6679	0.5739	0.8422	0.64	0.2247
Seagrass Biomass (g/m2)	0.3204	0.7008	0.2974	0.0565	0.7404	0.1482	0.9165	0.902	0.3813	0.6666	0.6692	0.7954	0.8415	0.2867	0.2868	0.0464	0.8668	0.4639	0.1374	0.7173	0.8568	0.7438	0.9411	<.0001	0.2415	0.5458	0.1978	0.195	0.0609	0.0594	0.9971	0.0064	0.0781	0.9923	0.2876	0.4276	0.4816	0.5313	0.0976	0.0663	0.1929	0.0521	0.2107	0.2107	0.5416	0.1849	0.4199	0.5562	0.2827
Distance Reef-Mangrove (m)	0.2454	0.3953	0.3086	0.5442	0.1229	0.0164	0.7608	0.4016	0.123	0.0503	0.4152	0.0523	0.3522	0.3709	0.3712	0.2855	0.0688	0.1821	0.1945	0.7943	0.0864	0.4469	0.4964	0.2415	<.0001	0.2348	0.8051	0.7975	0.4094	0.819	0.1719	0.1227	0.8396	0.1685	0.0028	0.0058	0.0011	0.0206	0.3756	0.0742	0.0112	0.2479	0.0145	0.0145	0.0346	0.0033	0.1009	0.554	0.2126
Temp °C reef	0.3403	0.8631	0.7466	0.8497	0.9728	0.5	0.8027	0.9986	0.9159	0.4336	0.5506	0.953	0.7662	0.3977	0.3977	0.2333	0.7421	0.1502	0.779	0.2523	0.3047	0.2672	0.7048	0.5458	0.2348	<.0001	0.999	0.9874	0.935	0.6064	0.9508	0.2177	0.2986	0.5135	0.3926	0.484	0.2795	0.0569	0.3925	0.4889	0.4632	0.7875	0.3868	0.3868	0.6606	0.1946	0.5598	0.521	0.3529
Sal psu reef	0.6544	0.4602	0.7371	0.2471	0.3404	0.454	0.9062	0.8757	0.6606	0.6272	0.5064	0.464	0.6564	0.1074	0.1074	0.4253	0.9434	0.057	0.3277	0.1428	0.6451	0.2322	0.3523	0.1978	0.8051	0.999	<.0001	<.0001	0.1552	0.5845	0.1243	0.3438	0.197	0.3234	0.5906	0.7453	0.8961	0.7939	0.4701	0.6652	0.4052	0.4247	0.3834	0.3834	0.6188	0.4895	0.9418	0.868	0.8548
TDS mg/L reef	0.6494	0.4596	0.7371	0.2464	0.3422	0.4487	0.9057	0.8758	0.6591	0.6218	0.509	0.4652	0.655	0.1055	0.1054	0.4196	0.9451	0.0551	0.325	0.1452	0.6509	0.2353	0.3527	0.195	0.7975	0.9874	<.0001	<.0001	0.1539	0.5806	0.1252	0.3373	0.1941	0.3274	0.5852	0.739	0.904	0.8038	0.465	0.6597	0.4002	0.4238	0.3784	0.3784	0.6148	0.4837	0.9467	0.8657	0.8511
ODO mg/L reef	0.8636	0.0661	0.1884	0.0025	0.4448	0.1814	0.528	0.4287	0.0792	0.2181	0.3536	0.5535	0.3754	0.1853	0.1854	0.6151	0.6707	0.4908	0.0048	0.3372	0.5468	0.4148	0.9549	0.0609	0.4094	0.935	0.1552	0.1539	<.0001	0.026	0.9195	0.084	0.104	0.9536	0.6508	0.5015	0.7388	0.8292	0.7471	0.6526	0.4221	0.2402	0.576	0.576	0.784	0.516	0.7738	0.5916	0.6795
pH reef	0.5343	0.288	0.0702	0.0694	0.8621	0.7173	0.5457	0.4402	0.1841	0.587	0.8474	0.8662	0.6439	0.2245	0.2245	0.3213	0.509	0.9697	0.0928	0.9512	0.4736	0.8175	0.5287	0.0594	0.819	0.6064	0.5845	0.5806	0.026	<.0001	0.8236	0.178	0.0328	0.5538	0.7929	0.8195	0.8099	0.9402	0.5238	0.7127	0.9267	0.6695	0.7511	0.7511	0.5911	0.9186	0.9793	0.5	0.6194
Turbidity FNU reef	0.5512	0.995	0.7782	0.6796	0.001	0.3325	0.7251	0.809	0.6182	0.602	0.8842	0.0008	0.2855	0.2386	0.2383	0.5536	0.0754	0.5312	0.6289	0.6115	0.4226	0.4078	0.5492	0.9971	0.1719	0.9508	0.1243	0.1252	0.9195	0.8236	<.0001	0.6001	0.4971	0.0134	0.3616	0.2448	0.1409	0.1434	0.5782	0.6858	0.4633	0.4187	0.4869	0.4869	0.5431	0.3801	0.2839	0.6605	0.4349
Chlorophyll µg/L reef	0.5779	0.7902	0.3759	0.0959	0.3529	0.0255	0.9506	0.6884	0.6005	0.5901	0.8448	0.4725	0.3432	0.5194	0.5195	0.1152	0.7214	0.3262	0.1911	0.6236	0.8865	0.7128	0.6368	0.0064	0.1227	0.2177	0.3438	0.3373	0.084	0.178	0.6001	<.0001	0.1541	0.3023	0.2178	0.1812	0.2289	0.1177	0.2314	0.081	0.0627	0.0655	0.0627	0.0627	0.437	0.1237	0.4274	0.6963	0.3306
BGA-PE µg/L reef	0.8675	0.8643	0.188	0.1042	0.5758	0.9327	0.4689	0.9329	0.6053	0.8521	0.5106	0.5986	0.4764	0.3079	0.3078	0.4558	0.7187	0.2951	0.2246	0.9185	0.8804	0.9783	0.7528	0.0781	0.8396	0.2986	0.197	0.1941	0.104	0.0328	0.4971	0.1541	<.0001	0.4665	0.9046	0.5795	0.6222	0.749	0.7536	0.9498	0.8624	0.8075	0.9315	0.9315	0.4396	0.4234	0.907	0.1851	0.1329
fDOM RFU reef	0.6704	0.8042	0.6697	0.991	0.0126	0.1025	0.7804	0.7512	0.9069	0.8044	0.7554	0.0282	0.1061	0.2825	0.2823	0.892	0.2079	0.9409	0.9753	0.8977	0.8312	0.8819	0.8468	0.9923	0.1685	0.5135	0.3234	0.3274	0.9536	0.5538	0.0134	0.3023	0.4665	<.0001	0.3425	0.118	0.0965	0.0231	0.7385	0.4584	0.1661	0.4613	0.1496	0.1496	0.4301	0.3612	0.5533	0.5248	0.6824
Reef Biodiversity M1	0.3028	0.6404	0.2873	0.6229	0.3405	0.0495	0.8601	0.8021	0.3526	0.0824	0.4792	0.1678	0.2607	0.4041	0.4044	0.3049	0.1161	0.1244	0.256	0.7591	0.247	0.3731	0.9753	0.2876	0.0028	0.3926	0.5906	0.5852	0.6508	0.7929	0.3616	0.2178	0.9046	0.3425	<.0001	0.0033	0.0013	0.1398	0.1505	0.0464	0.0077	0.1011	0.0066	0.0066	0.0013	0.0102	0.0132	0.3296	0.4236
Reef Biodiversity M2	0.3486	0.3313	0.3676	0.6619	0.1134	0.0036	0.3868	0.6122	0.2943	0.066	0.5172	0.0933	0.0522	0.4579	0.4582	0.3663	0.1646	0.2821	0.2766	0.7882	0.2681	0.8169	0.7757	0.4276	0.0058	0.484	0.7453	0.739	0.5015	0.8195	0.2448	0.1812	0.5795	0.118	0.0033	<.0001	0.0003	0.1128	0.2569	0.0432	0.0006	0.1286	0.0034	0.0034	0.0011	0.0913	0.0844	0.2605	0.9322
Mangrove M1	0.2932	0.522	0.259	0.8458	0.1074	0.0229	0.5756	0.581	0.3095	0.0673	0.3434	0.0685	0.1885	0.5535	0.5538	0.3521	0.1534	0.3209	0.3504	0.6895	0.1325	0.3719	0.852	0.4816	0.0011	0.2795	0.8961	0.904	0.7388	0.8099	0.1409	0.2289	0.6222	0.0965	0.0013	0.0003	<.0001	0.0501	0.2542	0.0489	0.0069	0.2185	0.0116	0.0116	0.0038	0.0436	0.0393	0.3236	0.6254
Mangrove M2	0.6204	0.936	0.3949	0.9623	0.1574	0.0729	0.6452	0.932	0.6829	0.4474	0.4763	0.1168	0.5098	0.9863	0.9866	0.4723	0.2094	0.287	0.7801	0.7747	0.384	0.5565	0.6021	0.5313	0.0206	0.0569	0.7939	0.8038	0.8292	0.9402	0.1434	0.1177	0.749	0.0231	0.1398	0.1128	0.0501	<.0001	0.8843	0.2912	0.0942	0.6768	0.0604	0.0604	0.3836	0.0274	0.5181	0.8799	0.136
Seagrass M1	0.052	0.9143	0.9154	0.8086	0.7014	0.3591	0.392	0.8486	0.7793	0.5597	0.1768	0.6258	0.9868	0.1819	0.1819	0.009	0.5277	0.4881	0.5756	0.7005	0.7	0.7243	0.6457	0.0976	0.3756	0.3925	0.4701	0.465	0.7471	0.5238	0.5782	0.2314	0.7536	0.7385	0.1505	0.2569	0.2542	0.8843	<.0001	0.0119	0.1762	0.196	0.2076	0.2076	0.1145	0.4788	0.161	0.1903	0.8643
Seagrass M2	0.0578	0.8185	0.7487	0.7778	0.4982	0.0369	0.3948	1	0.5571	0.5455	0.0619	0.5535	0.5377	0.4201	0.4202	0.0092	0.7303	0.6018	0.6338	0.8665	0.6599	0.9782	0.862	0.0663	0.0742	0.4889	0.6652	0.6597	0.6526	0.7127	0.6858	0.081	0.9498	0.4584	0.0464	0.0432	0.0489	0.2912	0.0119	<.0001	0.0115	0.0783	0.0188	0.0188	0.0476	0.1889	0.2109	0.03	0.8125
Trophic level (Fish Base)	0.2601	0.4815	0.4749	0.5946	0.2374	0.0003	0.5034	0.8807	0.4205	0.2096	0.4078	0.2084	0.0867	0.4108	0.411	0.1551	0.2254	0.1941	0.3866	0.4679	0.5722	0.792	0.6268	0.1929	0.0112	0.4632	0.4052	0.4002	0.4221	0.9267	0.4633	0.0637	0.8624	0.1661	0.0077	0.0006	0.0069	0.0942	0.1762	0.0115	<.0001	0.0789	<.0001	<.0001	0.008	0.0602	0.2102	0.1658	0.7635
Trophic level Avg all species	0.9898	0.9398	0.4593	0.078	0.2853	0.0937	0.9385	0.4587	0.7735	0.6997	0.9817	0.2917	0.1149	0.9796	0.9798	0.452	0.3676	0.7346	0.1981	0.5477	0.7774	0.7929	0.2833	0.0521	0.2479	0.7875	0.4247	0.4238	0.2402	0.6695	0.4187	0.0655	0.8075	0.4613	0.1011	0.1286	0.2185	0.6768	0.196	0.0783	0.0789	<.0001	0.0854	0.0854	0.1429	0.2784	0.0868	0.1799	0.7135
Vulnerability (Fish Base)	0.343	0.7694	0.4171	0.6772	0.3219	0.0025	0.8244	0.8471	0.641	0.3284	0.4234	0.2426	0.1191	0.5473	0.5475	0.1769	0.1987	0.1332	0.5307	0.526	0.739	0.8784	0.5656	0.2107	0.0145	0.3868	0.3834	0.3784	0.576	0.7511	0.4869	0.0627	0.9315	0.1496	0.0066	0.0034	0.0116	0.0604	0.2076	0.0188	<.0001	0.0854	<.0001	<.0001	0.0155	0.0308	0.2122	0.1853	0.5716
Resilience high (No of species	Fish Base)	0.2606	0.4378	0.2541	0.8749	0.4113	0.0587	0.377	0.7017	0.4058	0.0782	0.4556	0.2952	0.139	0.3545	0.3547	0.352	0.2687	0.2435	0.3688	0.9852	0.3191	0.6236	0.6679	0.5416	0.0346	0.6606	0.6188	0.6148	0.784	0.5911	0.5431	0.437	0.4396	0.4301	0.0013	0.0011	0.0038	0.3836	0.1145	0.0476	0.008	0.1429	0.0155	0.0155	<.0001	0.1453	0.0339	0.1861
Resilience medium	0.4296	0.8647	0.3569	0.49	0.432	0.1022	0.5276	0.8387	0.3482	0.2013	0.6208	0.1763	0.6475	0.4744	0.4747	0.3465	0.0659	0.0542	0.2976	0.735	0.2906	0.3875	0.5739	0.1849	0.0033	0.1946	0.4895	0.4837	0.516	0.9186	0.3801	0.1237	0.4234	0.3612	0.0102	0.0913	0.0436	0.0274	0.4788	0.1889	0.0602	0.2784	0.0308	0.0308	0.1453	<.0001	0.1474	0.8177	0.0274
Resilience low	0.7437	0.9353	0.8049	0.4531	0.393	0.385	0.9051	0.9191	0.5986	0.1629	0.8535	0.2625	0.3893	0.7487	0.7489	0.6808	0.3533	0.4769	0.1859	0.2494	0.2867	0.0912	0.8422	0.4199	0.1009	0.5598	0.9418	0.9467	0.7738	0.9793	0.2839	0.4274	0.907	0.5533	0.0132	0.0844	0.0393	0.5181	0.161	0.2109	0.2102	0.0868	0.2122	0.2122	0.0339	0.1474	<.0001	0.5598	0.6037
Resilience very low	0.3381	0.7087	0.5804	0.6362	0.5914	0.305	0.4851	0.6754	0.8304	0.6703	0.0622	0.6443	0.5659	0.7389	0.7388	0.2386	0.73	0.5629	0.5376	0.5733	0.6227	0.635	0.64	0.5562	0.554	0.521	0.868	0.8657	0.5916	0.5	0.6605	0.6963	0.1851	0.5248	0.3296	0.2605	0.3236	0.8799	0.1903	0.03	0.1658	0.1799	0.1853	0.1853	0.1861	0.8177	0.5598	<.0001	0.6382
Resilience high %	0.9377	0.6007	0.8106	0.4741	0.6935	0.7362	0.0953	0.9496	0.63	0.8477	0.8785	0.371	0.5353	0.9779	0.9777	0.7377	0.1943	0.3753	0.589	0.4771	0.585	0.3417	0.2247	0.2827	0.2126	0.3529	0.8548	0.8511	0.6795	0.6194	0.4349	0.3306	0.1329	0.6824	0.4236	0.9322	0.6254	0.136	0.8643	0.8125	0.7635	0.7135	0.5716	0.5716	0.8746	0.0274	0.6037	0.6382	<.0001
Resilience medium %	0.7819	0.5752	0.9412	0.8128	0.8413	0.7657	0.1021	0.9692	0.9375	0.6298	0.841	0.8942	0.2669	0.8425	0.8424	0.9163	0.5592	0.5766	0.8754	0.8777	0.9745	0.8895	0.2275	0.7183	0.8481	0.5114	0.8202	0.819	0.842	0.6622	0.9407	0.7193	0.1102	0.9922	0.6711	0.3691	0.5484	0.3443	0.2821	0.4884	0.6015	0.4962	0.8031	0.8031	0.1871	0.3383	0.3805	0.2584	0.0128
Resilience low %	0.6762	0.8414	0.8821	0.3387	0.3343	0.3539	0.9204	0.9484	0.44	0.1456	0.8152	0.2126	0.4618	0.6863	0.6866	0.6114	0.3046	0.514	0.1247	0.25	0.2261	0.0957	0.9683	0.2969	0.0743	0.5771	0.9575	0.9623	0.6195	0.813	0.2451	0.3552	0.9369	0.5832	0.0139	0.0948	0.0421	0.4916	0.165	0.188	0.2146	0.0726	0.2262	0.2262	0.0496	0.1132	<.0001	0.5762	0.4622
Resilience very low %	0.3381	0.7087	0.5804	0.6362	0.5914	0.305	0.4851	0.6754	0.8304	0.6703	0.0622	0.6443	0.5659	0.7389	0.7388	0.2386	0.73	0.5629	0.5376	0.5733	0.6227	0.635	0.64	0.5562	0.554	0.521	0.868	0.8657	0.5916	0.5	0.6605	0.6963	0.1851	0.5248	0.3296	0.2605	0.3236	0.8799	0.1903	0.03	0.1658	0.1799	0.1853	0.1853	0.1861	0.8177	0.5598	<.0001	0.6382
Substrate complexity high (number of species	RLS Team)	0.4361	0.3149	0.8908	0.9216	0.6881	0.9201	0.7864	0.2956	0.5834	0.9753	0.2516	0.809	0.8276	0.9282	0.9281	0.262	0.8472	0.7954	1	0.1611	0.9469	0.1538	0.1755	0.4027	0.6117	0.7385	0.9675	0.9649	0.5222	0.7692	0.9537	0.6786	0.8315	0.8229	0.1684	0.4908	0.3738	0.9295	0.019	0.1215	0.4662	0.1493	0.3938	0.3938	0.1633	0.4982	0.0443	0.1627
Substrate complexity medium	0.2516	0.4161	0.1586	0.7785	0.0938	0.0204	0.6532	0.3652	0.1451	0.0895	0.2946	0.03	0.3099	0.5318	0.5321	0.3731	0.0315	0.3285	0.361	0.9499	0.1297	0.5566	0.4818	0.4081	0.0001	0.4933	0.9508	0.9457	0.6218	0.8539	0.1311	0.2733	0.7398	0.1427	0.0041	0.0043	0.0012	0.0436	0.4722	0.0703	0.0101	0.2679	0.0146	0.0146	0.0221	0.0139	0.1424	0.3079	0.3287
Substrate complexity low	0.4812	0.8077	0.5084	0.5118	0.7351	0.1741	0.9152	0.8614	0.6017	0.1138	0.849	0.4696	0.3069	0.3455	0.3457	0.3983	0.303	0.0546	0.2143	0.6586	0.4135	0.3164	0.6023	0.3042	0.0474	0.3615	0.3611	0.3566	0.6496	0.8157	0.7193	0.2639	0.858	0.6675	0.0008	0.0334	0.0284	0.3452	0.1056	0.1327	0.0481	0.1021	0.0351	0.0351	0.0068	0.0347	0.0057	0.5824	0.5289
Substrate complexity high %	0.568	0.3907	0.5112	0.9278	0.2457	0.8387	0.8789	0.1787	0.2922	0.6216	0.595	0.1655	0.8878	0.7535	0.7533	0.2448	0.1417	0.905	0.8265	0.7001	0.4361	0.8492	0.1485	0.4796	0.6418	0.8049	0.6183	0.6163	0.6884	0.9644	0.2749	0.7116	0.9827	0.4435	0.7171	0.948	0.9902	0.4235	0.0213	0.2931	0.8113	0.3667	0.7732	0.7732	0.5253	0.7273	0.3726	0.3393	0.4226
Substrate complexity medium %	0.4612	0.8711	0.9749	0.5775	0.4058	0.578	0.8851	0.4441	0.8892	0.4696	0.9558	0.5516	0.7211	0.2408	0.2408	0.2418	0.845	0.075	0.4193	0.7416	0.9673	0.5717	0.2659	0.2437	0.4824	0.4012	0.1358	0.1335	0.7394	0.9442	0.4039	0.3475	0.5226	0.5828	0.1073	0.3528	0.3875	0.9608	0.0266	0.2323	0.2754	0.1977	0.221	0.221	0.124	0.2906	0.0867	0.7165	0.8769
Substrate complexity low %	0.4861	0.9057	0.8335	0.4593	0.5522	0.4317	0.8103	0.6482	0.8306	0.2561	0.8936	0.8098	0.6141	0.1716	0.1716	0.3189	0.7846	0.0158	0.2595	0.7924	0.7292	0.5253	0.4052	0.2401	0.2738	0.3367	0.0887	0.0867	0.5643	0.944	0.534	0.3004	0.4242	0.6953	0.0507	0.246	0.2723	0.7156	0.078	0.2857	0.1957	0.2143	0.1474	0.1474	0.091	0.1223	0.0748	0.9229	0.6168
Total Biomass (g)	0.6195	0.6931	0.2132	0.5509	0.4748	0.0672	0.8777	0.5441	0.673	0.738	0.4056	0.4194	0.2106	0.9287	0.9286	0.438	0.4054	0.2263	0.6701	0.6895	0.965	0.9598	0.4947	0.8658	0.1285	0.2203	0.8543	0.8469	0.675	0.2555	0.5145	0.2809	0.5656	0.0504	0.1165	0.0568	0.0651	0.0263	0.5827	0.1775	0.027	0.545	0.0097	0.0097	0.1306	0.1574	0.5821	0.3384	0.7741
Total Biomass tonnes / hectare	0.4695	0.5112	0.9175	0.8668	0.8687	0.6498	0.8131	0.4443	0.6637	0.335	0.1678	0.8907	0.9563	0.7684	0.7684	0.2612	0.9258	0.5878	0.5122	0.4347	0.2763	0.4363	0.5736	0.3843	0.9805	0.2893	0.7004	0.7056	0.6989	0.6824	0.8344	0.7804	0.5119	0.8753	0.6215	0.7384	0.8696	0.6578	0.2297	0.1094	0.436	0.1841	0.4169	0.4169	0.5087	0.954	0.8276	0.0026	0.8337
Biomass <10cm %	0.265	0.8891	0.0333	0.3783	0.8657	0.2834	0.9142	0.9233	0.8929	0.2651	0.2978	0.5774	0.7169	0.53	0.5302	0.3953	0.3928	0.0673	0.91	0.4948	0.3257	0.2615	0.8612	0.9919	0.0587	0.0817	0.9045	0.8962	0.5084	0.2954	0.7213	0.6361	0.7116	0.3506	0.0336	0.0831	0.0336	0.0597	0.3935	0.2611	0.1009	0.9272	0.058	0.058	0.0643	0.0537	0.2517	0.6674	0.5075
≤10	0.269	0.4631	0.47	0.5077	0.2749	0.0011	0.5466	0.8638	0.3672	0.2173	0.4406	0.2055	0.1015	0.3919	0.3921	0.1703	0.1621	0.1898	0.3406	0.4113	0.6134	0.7542	0.6548	0.1574	0.0129	0.6383	0.31	0.3068	0.3809	0.9249	0.5061	0.0814	0.8943	0.253	0.0056	0.0017	0.013	0.1516	0.1796	0.0126	<.0001	0.0516	<.0001	<.0001	0.0074	0.0491	0.1954	0.1408	0.6891
≤12.5-≥20	0.3179	0.8955	0.1005	0.5789	0.6539	0.0757	0.9757	0.821	0.9955	0.3965	0.312	0.4743	0.3578	0.629	0.6292	0.2818	0.3418	0.075	0.9254	0.97	0.6405	0.7035	0.7435	0.7228	0.0457	0.1392	0.6644	0.6568	0.7422	0.3267	0.6645	0.3102	0.7143	0.1742	0.0266	0.03	0.024	0.0321	0.3455	0.1165	0.0157	0.5504	0.0047	0.0047	0.0435	0.0503	0.337	0.3908	0.5978
≥25	0.8413	0.9958	0.2987	0.7805	0.7671	0.9522	0.9072	0.9026	0.9753	0.194	0.8667	0.9186	0.5918	0.5819	0.582	0.8975	0.6607	0.1927	0.6232	0.2831	0.4338	0.1099	0.6051	0.6949	0.4495	0.5629	0.8168	0.8136	0.5959	0.3106	0.9839	0.7499	0.5796	0.9202	0.1008	0.2826	0.2198	0.9215	0.3767	0.7678	0.529	0.6965	0.4755	0.4755	0.0709	0.4184	0.0365	0.9883	0.8812
[truncated: 15 more columns]

## Sheet: Corr Prob sign Env fish sp
Correlation Probability
	Hard coral reef	Hard coral bleached	Recently killed coral	Anemone	Soft coral reef	Sponges	Worms	Zoanthid	Rubble	Sand reef	Rock	Calcifying algae reef	Macroalgae reef	Soft Substrate	Hard substrate	Thalassia	Syringodium	Sand seagrass	Hard coral seagrass	Soft coral seagrass	Sponge seagrass	Macroalgae seagrass	Calcifying algae seagrass	Seagrass Biomass (g/m2)	Distance Reef-Mangrove (m)	Temp °C reef	Sal psu reef	TDS mg/L reef	ODO mg/L reef	pH reef	Turbidity FNU reef	Chlorophyll µg/L reef	BGA-PE µg/L reef	fDOM RFU reef	Reef Biodiversity M1	Reef Biodiversity M2	Mangrove M1	Mangrove M2	Seagrass M1	Seagrass M2	Trophic level (Fish Base)	Trophic level Avg all species	Vulnerability (Fish Base)	Vulnerability (Fish Base)/10	Resilience high (No of species, Fish Base)	Resilience medium	Resilience low	Resilience very low	Resilience high %
Hard coral reef	<.0001	0.3977	0.3576	0.6196	0.7318	0.3847	0.1212	0.2305	0.2308	0.3455	0.0223	0.7434	0.4974	0.0437	0.0437	0.0063	0.7648	0.4935	0.8363	0.7835	0.2114	0.8396	0.3475	0.3204	0.2454	0.3403	0.6544	0.6494	0.8636	0.5343	0.5512	0.5779	0.8675	0.6704	0.3028	0.3486	0.2932	0.6204	0.052	0.0578	0.2601	0.9898	0.343	0.343	0.2606	0.4296	0.7437	0.3381	0.9377
Hard coral bleached	0.3977	<.0001	0.922	0.3609	0.494	0.301	0.0332	0.0099	0.0047	0.0242	0.7424	0.5572	0.4639	0.0551	0.0552	0.8199	0.6359	0.6244	0.0649	0.4726	0.1035	0.592	0.5576	0.7008	0.3953	0.8631	0.4602	0.4596	0.0661	0.288	0.995	0.7902	0.8643	0.8042	0.6404	0.3313	0.522	0.936	0.9143	0.8185	0.4815	0.9398	0.7694	0.7694	0.4378	0.8647	0.9353	0.7087	0.6007
Recently killed coral	0.3576	0.922	<.0001	0.0779	0.9709	0.7784	0.8279	0.4276	0.7479	0.4699	0.2485	0.5841	0.9201	0.8069	0.807	0.9533	0.2552	0.4472	0.433	0.7131	0.3679	0.4594	0.3908	0.2974	0.3086	0.7466	0.7371	0.7371	0.1884	0.0702	0.7782	0.3759	0.188	0.6697	0.2873	0.3676	0.259	0.3949	0.9154	0.7487	0.4749	0.4593	0.4171	0.4171	0.2541	0.3569	0.8049	0.5804	0.8106
Anemone	0.6196	0.3609	0.0779	<.0001	0.4157	0.3531	0.8719	0.9623	0.2949	0.4557	0.189	0.4593	0.3483	0.5861	0.5862	0.9317	0.548	0.6579	0.0076	0.5414	0.8747	0.6719	0.7072	0.0565	0.5442	0.8497	0.2471	0.2464	0.0025	0.0694	0.6796	0.0959	0.1042	0.991	0.6229	0.6619	0.8458	0.9623	0.8086	0.7778	0.5946	0.078	0.6772	0.6772	0.8749	0.49	0.4531	0.6362	0.4741
Soft coral reef	0.7318	0.494	0.9709	0.4157	<.0001	0.0993	0.7717	0.5637	0.336	0.3916	0.9624	0.0006	0.1019	0.5257	0.5253	0.7629	0.0929	0.6248	0.3587	0.8748	0.3913	0.883	0.7162	0.7404	0.1229	0.9728	0.3404	0.3422	0.4448	0.8621	0.001	0.3529	0.5758	0.0126	0.3405	0.1134	0.1074	0.1574	0.7014	0.4982	0.2374	0.2853	0.3219	0.3219	0.4113	0.432	0.393	0.5914	0.6935
Sponges	0.3847	0.301	0.7784	0.3531	0.0993	<.0001	0.4363	0.7117	0.278	0.2073	0.5971	0.1258	0.0576	0.4484	0.4487	0.2216	0.2246	0.3137	0.2503	0.317	0.5404	0.559	0.7314	0.1482	0.0164	0.5	0.454	0.4487	0.1814	0.7173	0.3325	0.0255	0.9327	0.1025	0.0495	0.0036	0.0229	0.0729	0.3591	0.0369	0.0003	0.0937	0.0025	0.0025	0.0587	0.1022	0.385	0.305	0.7362
Worms	0.1212	0.0332	0.8279	0.8719	0.7717	0.4363	<.0001	0.0776	0.1603	0.2592	0.4318	0.9291	0.6861	0.1431	0.1432	0.3779	0.6073	0.7626	0.5979	0.5617	0.3162	0.4851	0.8253	0.9165	0.7608	0.8027	0.9062	0.9057	0.528	0.5457	0.7251	0.9506	0.4689	0.7804	0.8601	0.3868	0.5756	0.6452	0.392	0.3948	0.5034	0.9385	0.8244	0.8244	0.377	0.5276	0.9051	0.4851	0.0953
Zoanthid	0.2305	0.0099	0.4276	0.9623	0.5637	0.7117	0.0776	<.0001	0.0037	0.0606	0.706	0.525	0.7942	0.1356	0.1356	0.8704	0.5953	0.9437	0.3163	0.8751	0.0145	0.8217	0.0509	0.902	0.4016	0.9986	0.8757	0.8758	0.4287	0.4402	0.809	0.6884	0.9329	0.7512	0.8021	0.6122	0.581	0.932	0.8486	1	0.8807	0.4587	0.8471	0.8471	0.7017	0.8387	0.9191	0.6754	0.9496
Rubble	0.2308	0.0047	0.7479	0.2949	0.336	0.278	0.1603	0.0037	<.0001	0.0176	0.8556	0.2772	0.8306	0.0729	0.073	0.5808	0.314	0.6084	0.0388	0.9448	0.0177	0.8789	0.1338	0.3813	0.123	0.9159	0.6606	0.6591	0.0792	0.1841	0.6182	0.6005	0.6053	0.9069	0.3526	0.2943	0.3095	0.6829	0.7793	0.5571	0.4205	0.7735	0.641	0.641	0.4058	0.3482	0.5986	0.8304	0.63
Sand reef	0.3455	0.0242	0.4699	0.4557	0.3916	0.2073	0.2592	0.0606	0.0176	<.0001	0.8864	0.2862	0.3964	0.0637	0.0638	0.7353	0.311	0.1732	0.0312	0.7213	0.0075	0.4316	0.5259	0.6666	0.0503	0.4336	0.6272	0.6218	0.2181	0.587	0.602	0.5901	0.8521	0.8044	0.0824	0.066	0.0673	0.4474	0.5597	0.5455	0.2096	0.6997	0.3284	0.3284	0.0782	0.2013	0.1629	0.6703	0.8477
Rock	0.0223	0.7424	0.2485	0.189	0.9624	0.5971	0.4318	0.706	0.8556	0.8864	<.0001	0.9836	0.4245	0.7605	0.7605	0.0512	0.8696	0.7682	0.3557	0.5939	0.6048	0.7036	0.356	0.6692	0.4152	0.5506	0.5064	0.509	0.3536	0.8474	0.8842	0.8448	0.5106	0.7554	0.4792	0.5172	0.3434	0.4763	0.1768	0.0619	0.4078	0.9817	0.4234	0.4234	0.4556	0.6208	0.8535	0.0622	0.8785
Calcifying algae reef	0.7434	0.5572	0.5841	0.4593	0.0006	0.1258	0.9291	0.525	0.2772	0.2862	0.9836	<.0001	0.1471	0.5757	0.5753	0.6608	0.0076	0.9506	0.3393	0.9974	0.3029	0.6294	0.5436	0.7954	0.0523	0.953	0.464	0.4652	0.5535	0.8662	0.0008	0.4725	0.5986	0.0282	0.1678	0.0933	0.0685	0.1168	0.6258	0.5535	0.2084	0.2917	0.2426	0.2426	0.2952	0.1763	0.2625	0.6443	0.371
Macroalgae reef	0.4974	0.4639	0.9201	0.3483	0.1019	0.0576	0.6861	0.7942	0.8306	0.3964	0.4245	0.1471	<.0001	0.8367	0.8365	0.6961	0.2572	0.6571	0.3528	0.2093	0.8893	0.4657	0.1299	0.8415	0.3522	0.7662	0.6564	0.655	0.3754	0.6439	0.2855	0.3432	0.4764	0.1061	0.2607	0.0522	0.1885	0.5098	0.9868	0.5377	0.0867	0.1149	0.1191	0.1191	0.139	0.6475	0.3893	0.5659	0.5353
Soft Substrate	0.0437	0.0551	0.8069	0.5861	0.5257	0.4484	0.1431	0.1356	0.0729	0.0637	0.7605	0.5757	0.8367	<.0001	<.0001	0.1339	0.7808	0.1101	0.1592	0.8947	0.1628	0.9418	0.6533	0.2867	0.3709	0.3977	0.1074	0.1055	0.1853	0.2245	0.2386	0.5194	0.3079	0.2825	0.4041	0.4579	0.5535	0.9863	0.1819	0.4201	0.4108	0.9796	0.5473	0.5473	0.3545	0.4744	0.7487	0.7389	0.9779
Hard substrate	0.0437	0.0552	0.807	0.5862	0.5253	0.4487	0.1432	0.1356	0.073	0.0638	0.7605	0.5753	0.8365	<.0001	<.0001	0.1339	0.7804	0.1101	0.1593	0.8947	0.163	0.9417	0.6534	0.2868	0.3712	0.3977	0.1074	0.1054	0.1854	0.2245	0.2383	0.5195	0.3078	0.2823	0.4044	0.4582	0.5538	0.9866	0.1819	0.4202	0.411	0.9798	0.5475	0.5475	0.3547	0.4747	0.7489	0.7388	0.9777
Thalassia	0.0063	0.8199	0.9533	0.9317	0.7629	0.2216	0.3779	0.8704	0.5808	0.7353	0.0512	0.6608	0.6961	0.1339	0.1339	<.0001	0.5856	0.461	0.7918	0.9811	0.6798	0.8737	0.8576	0.0464	0.2855	0.2333	0.4253	0.4196	0.6151	0.3213	0.5536	0.1152	0.4558	0.892	0.3049	0.3663	0.3521	0.4723	0.009	0.0092	0.1551	0.452	0.1769	0.1769	0.352	0.3465	0.6808	0.2386	0.7377
Syringodium	0.7648	0.6359	0.2552	0.548	0.0929	0.2246	0.6073	0.5953	0.314	0.311	0.8696	0.0076	0.2572	0.7808	0.7804	0.5856	<.0001	0.5244	0.4315	0.7632	0.4682	0.732	0.5711	0.8668	0.0688	0.7421	0.9434	0.9451	0.6707	0.509	0.0754	0.7214	0.7187	0.2079	0.1161	0.1646	0.1534	0.2094	0.5277	0.7303	0.2254	0.3676	0.1987	0.1987	0.2687	0.0659	0.3533	0.73	0.1943
Sand seagrass	0.4935	0.6244	0.4472	0.6579	0.6248	0.3137	0.7626	0.9437	0.6084	0.1732	0.7682	0.9506	0.6571	0.1101	0.1101	0.461	0.5244	<.0001	0.3595	0.8851	0.5527	0.7894	0.7658	0.4639	0.1821	0.1502	0.057	0.0551	0.4908	0.9697	0.5312	0.3262	0.2951	0.9409	0.1244	0.2821	0.3209	0.287	0.4881	0.6018	0.1941	0.7346	0.1332	0.1332	0.2435	0.0542	0.4769	0.5629	0.3753
Hard coral seagrass	0.8363	0.0649	0.433	0.0076	0.3587	0.2503	0.5979	0.3163	0.0388	0.0312	0.3557	0.3393	0.3528	0.1592	0.1593	0.7918	0.4315	0.3595	<.0001	0.957	0.1715	0.8094	0.8725	0.1374	0.1945	0.779	0.3277	0.325	0.0048	0.0928	0.6289	0.1911	0.2246	0.9753	0.256	0.2766	0.3504	0.7801	0.5756	0.6338	0.3866	0.1981	0.5307	0.5307	0.3688	0.2976	0.1859	0.5376	0.589
Soft coral seagrass	0.7835	0.4726	0.7131	0.5414	0.8748	0.317	0.5617	0.8751	0.9448	0.7213	0.5939	0.9974	0.2093	0.8947	0.8947	0.9811	0.7632	0.8851	0.957	<.0001	0.2133	0.0003	0.25	0.7173	0.7943	0.2523	0.1428	0.1452	0.3372	0.9512	0.6115	0.6236	0.9185	0.8977	0.7591	0.7882	0.6895	0.7747	0.7005	0.8665	0.4679	0.5477	0.526	0.526	0.9852	0.735	0.2494	0.5733	0.4771
Sponge seagrass	0.2114	0.1035	0.3679	0.8747	0.3913	0.5404	0.3162	0.0145	0.0177	0.0075	0.6048	0.3029	0.8893	0.1628	0.163	0.6798	0.4682	0.5527	0.1715	0.2133	<.0001	0.1372	0.0643	0.8568	0.0864	0.3047	0.6451	0.6509	0.5468	0.4736	0.4226	0.8865	0.8804	0.8312	0.247	0.2681	0.1325	0.384	0.7	0.6599	0.5722	0.7774	0.739	0.739	0.3191	0.2906	0.2867	0.6227	0.585
Macroalgae seagrass	0.8396	0.592	0.4594	0.6719	0.883	0.559	0.4851	0.8217	0.8789	0.4316	0.7036	0.6294	0.4657	0.9418	0.9417	0.8737	0.732	0.7894	0.8094	0.0003	0.1372	<.0001	0.2888	0.7438	0.4469	0.2672	0.2322	0.2353	0.4148	0.8175	0.4078	0.7128	0.9783	0.8819	0.3731	0.8169	0.3719	0.5565	0.7243	0.9782	0.792	0.7929	0.8784	0.8784	0.6236	0.3875	0.0912	0.635	0.3417
Calcifying algae seagrass	0.3475	0.5576	0.3908	0.7072	0.7162	0.7314	0.8253	0.0509	0.1338	0.5259	0.356	0.5436	0.1299	0.6533	0.6534	0.8576	0.5711	0.7658	0.8725	0.25	0.0643	0.2888	<.0001	0.9411	0.4964	0.7048	0.3523	0.3527	0.9549	0.5287	0.5492	0.6368	0.7528	0.8468	0.9753	0.7757	0.852	0.6021	0.6457	0.862	0.6268	0.2833	0.5656	0.5656	0.6679	0.5739	0.8422	0.64	0.2247
Seagrass Biomass (g/m2)	0.3204	0.7008	0.2974	0.0565	0.7404	0.1482	0.9165	0.902	0.3813	0.6666	0.6692	0.7954	0.8415	0.2867	0.2868	0.0464	0.8668	0.4639	0.1374	0.7173	0.8568	0.7438	0.9411	<.0001	0.2415	0.5458	0.1978	0.195	0.0609	0.0594	0.9971	0.0064	0.0781	0.9923	0.2876	0.4276	0.4816	0.5313	0.0976	0.0663	0.1929	0.0521	0.2107	0.2107	0.5416	0.1849	0.4199	0.5562	0.2827
Distance Reef-Mangrove (m)	0.2454	0.3953	0.3086	0.5442	0.1229	0.0164	0.7608	0.4016	0.123	0.0503	0.4152	0.0523	0.3522	0.3709	0.3712	0.2855	0.0688	0.1821	0.1945	0.7943	0.0864	0.4469	0.4964	0.2415	<.0001	0.2348	0.8051	0.7975	0.4094	0.819	0.1719	0.1227	0.8396	0.1685	0.0028	0.0058	0.0011	0.0206	0.3756	0.0742	0.0112	0.2479	0.0145	0.0145	0.0346	0.0033	0.1009	0.554	0.2126
Temp °C reef	0.3403	0.8631	0.7466	0.8497	0.9728	0.5	0.8027	0.9986	0.9159	0.4336	0.5506	0.953	0.7662	0.3977	0.3977	0.2333	0.7421	0.1502	0.779	0.2523	0.3047	0.2672	0.7048	0.5458	0.2348	<.0001	0.999	0.9874	0.935	0.6064	0.9508	0.2177	0.2986	0.5135	0.3926	0.484	0.2795	0.0569	0.3925	0.4889	0.4632	0.7875	0.3868	0.3868	0.6606	0.1946	0.5598	0.521	0.3529
Sal psu reef	0.6544	0.4602	0.7371	0.2471	0.3404	0.454	0.9062	0.8757	0.6606	0.6272	0.5064	0.464	0.6564	0.1074	0.1074	0.4253	0.9434	0.057	0.3277	0.1428	0.6451	0.2322	0.3523	0.1978	0.8051	0.999	<.0001	<.0001	0.1552	0.5845	0.1243	0.3438	0.197	0.3234	0.5906	0.7453	0.8961	0.7939	0.4701	0.6652	0.4052	0.4247	0.3834	0.3834	0.6188	0.4895	0.9418	0.868	0.8548
TDS mg/L reef	0.6494	0.4596	0.7371	0.2464	0.3422	0.4487	0.9057	0.8758	0.6591	0.6218	0.509	0.4652	0.655	0.1055	0.1054	0.4196	0.9451	0.0551	0.325	0.1452	0.6509	0.2353	0.3527	0.195	0.7975	0.9874	<.0001	<.0001	0.1539	0.5806	0.1252	0.3373	0.1941	0.3274	0.5852	0.739	0.904	0.8038	0.465	0.6597	0.4002	0.4238	0.3784	0.3784	0.6148	0.4837	0.9467	0.8657	0.8511
ODO mg/L reef	0.8636	0.0661	0.1884	0.0025	0.4448	0.1814	0.528	0.4287	0.0792	0.2181	0.3536	0.5535	0.3754	0.1853	0.1854	0.6151	0.6707	0.4908	0.0048	0.3372	0.5468	0.4148	0.9549	0.0609	0.4094	0.935	0.1552	0.1539	<.0001	0.026	0.9195	0.084	0.104	0.9536	0.6508	0.5015	0.7388	0.8292	0.7471	0.6526	0.4221	0.2402	0.576	0.576	0.784	0.516	0.7738	0.5916	0.6795
pH reef	0.5343	0.288	0.0702	0.0694	0.8621	0.7173	0.5457	0.4402	0.1841	0.587	0.8474	0.8662	0.6439	0.2245	0.2245	0.3213	0.509	0.9697	0.0928	0.9512	0.4736	0.8175	0.5287	0.0594	0.819	0.6064	0.5845	0.5806	0.026	<.0001	0.8236	0.178	0.0328	0.5538	0.7929	0.8195	0.8099	0.9402	0.5238	0.7127	0.9267	0.6695	0.7511	0.7511	0.5911	0.9186	0.9793	0.5	0.6194
Turbidity FNU reef	0.5512	0.995	0.7782	0.6796	0.001	0.3325	0.7251	0.809	0.6182	0.602	0.8842	0.0008	0.2855	0.2386	0.2383	0.5536	0.0754	0.5312	0.6289	0.6115	0.4226	0.4078	0.5492	0.9971	0.1719	0.9508	0.1243	0.1252	0.9195	0.8236	<.0001	0.6001	0.4971	0.0134	0.3616	0.2448	0.1409	0.1434	0.5782	0.6858	0.4633	0.4187	0.4869	0.4869	0.5431	0.3801	0.2839	0.6605	0.4349
Chlorophyll µg/L reef	0.5779	0.7902	0.3759	0.0959	0.3529	0.0255	0.9506	0.6884	0.6005	0.5901	0.8448	0.4725	0.3432	0.5194	0.5195	0.1152	0.7214	0.3262	0.1911	0.6236	0.8865	0.7128	0.6368	0.0064	0.1227	0.2177	0.3438	0.3373	0.084	0.178	0.6001	<.0001	0.1541	0.3023	0.2178	0.1812	0.2289	0.1177	0.2314	0.081	0.0637	0.0655	0.0627	0.0627	0.437	0.1237	0.4274	0.6963	0.3306
BGA-PE µg/L reef	0.8675	0.8643	0.188	0.1042	0.5758	0.9327	0.4689	0.9329	0.6053	0.8521	0.5106	0.5986	0.4764	0.3079	0.3078	0.4558	0.7187	0.2951	0.2246	0.9185	0.8804	0.9783	0.7528	0.0781	0.8396	0.2986	0.197	0.1941	0.104	0.0328	0.4971	0.1541	<.0001	0.4665	0.9046	0.5795	0.6222	0.749	0.7536	0.9498	0.8624	0.8075	0.9315	0.9315	0.4396	0.4234	0.907	0.1851	0.1329
fDOM RFU reef	0.6704	0.8042	0.6697	0.991	0.0126	0.1025	0.7804	0.7512	0.9069	0.8044	0.7554	0.0282	0.1061	0.2825	0.2823	0.892	0.2079	0.9409	0.9753	0.8977	0.8312	0.8819	0.8468	0.9923	0.1685	0.5135	0.3234	0.3274	0.9536	0.5538	0.0134	0.3023	0.4665	<.0001	0.3425	0.118	0.0965	0.0231	0.7385	0.4584	0.1661	0.4613	0.1496	0.1496	0.4301	0.3612	0.5533	0.5248	0.6824
Reef Biodiversity M1	0.3028	0.6404	0.2873	0.6229	0.3405	0.0495	0.8601	0.8021	0.3526	0.0824	0.4792	0.1678	0.2607	0.4041	0.4044	0.3049	0.1161	0.1244	0.256	0.7591	0.247	0.3731	0.9753	0.2876	0.0028	0.3926	0.5906	0.5852	0.6508	0.7929	0.3616	0.2178	0.9046	0.3425	<.0001	0.0033	0.0013	0.1398	0.1505	0.0464	0.0077	0.1011	0.0066	0.0066	0.0013	0.0102	0.0132	0.3296	0.4236
Reef Biodiversity M2	0.3486	0.3313	0.3676	0.6619	0.1134	0.0036	0.3868	0.6122	0.2943	0.066	0.5172	0.0933	0.0522	0.4579	0.4582	0.3663	0.1646	0.2821	0.2766	0.7882	0.2681	0.8169	0.7757	0.4276	0.0058	0.484	0.7453	0.739	0.5015	0.8195	0.2448	0.1812	0.5795	0.118	0.0033	<.0001	0.0003	0.1128	0.2569	0.0432	0.0006	0.1286	0.0034	0.0034	0.0011	0.0913	0.0844	0.2605	0.9322
Mangrove M1	0.2932	0.522	0.259	0.8458	0.1074	0.0229	0.5756	0.581	0.3095	0.0673	0.3434	0.0685	0.1885	0.5535	0.5538	0.3521	0.1534	0.3209	0.3504	0.6895	0.1325	0.3719	0.852	0.4816	0.0011	0.2795	0.8961	0.904	0.7388	0.8099	0.1409	0.2289	0.6222	0.0965	0.0013	0.0003	<.0001	0.0501	0.2542	0.0489	0.0069	0.2185	0.0116	0.0116	0.0038	0.0436	0.0393	0.3236	0.6254
Mangrove M2	0.6204	0.936	0.3949	0.9623	0.1574	0.0729	0.6452	0.932	0.6829	0.4474	0.4763	0.1168	0.5098	0.9863	0.9866	0.4723	0.2094	0.287	0.7801	0.7747	0.384	0.5565	0.6021	0.5313	0.0206	0.0569	0.7939	0.8038	0.8292	0.9402	0.1434	0.1177	0.749	0.0231	0.1398	0.1128	0.0501	<.0001	0.8843	0.2912	0.0942	0.6768	0.0604	0.0604	0.3836	0.0274	0.5181	0.8799	0.136
Seagrass M1	0.052	0.9143	0.9154	0.8086	0.7014	0.3591	0.392	0.8486	0.7793	0.5597	0.1768	0.6258	0.9868	0.1819	0.1819	0.009	0.5277	0.4881	0.5756	0.7005	0.7	0.7243	0.6457	0.0976	0.3756	0.3925	0.4701	0.465	0.7471	0.5238	0.5782	0.2314	0.7536	0.7385	0.1505	0.2569	0.2542	0.8843	<.0001	0.0119	0.1762	0.196	0.2076	0.2076	0.1145	0.4788	0.161	0.1903	0.8643
Seagrass M2	0.0578	0.8185	0.7487	0.7778	0.4982	0.0369	0.3948	1	0.5571	0.5455	0.0619	0.5535	0.5377	0.4201	0.4202	0.0092	0.7303	0.6018	0.6338	0.8665	0.6599	0.9782	0.862	0.0663	0.0742	0.4889	0.6652	0.6597	0.6526	0.7127	0.6858	0.081	0.9498	0.4584	0.0464	0.0432	0.0489	0.2912	0.0119	<.0001	0.0115	0.0783	0.0188	0.0188	0.0476	0.1889	0.2109	0.03	0.8125
Trophic level (Fish Base)	0.2601	0.4815	0.4749	0.5946	0.2374	0.0003	0.5034	0.8807	0.4205	0.2096	0.4078	0.2084	0.0867	0.4108	0.411	0.1551	0.2254	0.1941	0.3866	0.4679	0.5722	0.792	0.6268	0.1929	0.0112	0.4632	0.4052	0.4002	0.4221	0.9267	0.4633	0.0637	0.8624	0.1661	0.0077	0.0006	0.0069	0.0942	0.1762	0.0115	<.0001	0.0789	<.0001	<.0001	0.008	0.0602	0.2102	0.1658	0.7635
Trophic level Avg all species	0.9898	0.9398	0.4593	0.078	0.2853	0.0937	0.9385	0.4587	0.7735	0.6997	0.9817	0.2917	0.1149	0.9796	0.9798	0.452	0.3676	0.7346	0.1981	0.5477	0.7774	0.7929	0.2833	0.0521	0.2479	0.7875	0.4247	0.4238	0.2402	0.6695	0.4187	0.0655	0.8075	0.4613	0.1011	0.1286	0.2185	0.6768	0.196	0.0783	0.0789	<.0001	0.0854	0.0854	0.1429	0.2784	0.0868	0.1799	0.7135
Vulnerability (Fish Base)	0.343	0.7694	0.4171	0.6772	0.3219	0.0025	0.8244	0.8471	0.641	0.3284	0.4234	0.2426	0.1191	0.5473	0.5475	0.1769	0.1987	0.1332	0.5307	0.526	0.739	0.8784	0.5656	0.2107	0.0145	0.3868	0.3834	0.3784	0.576	0.7511	0.4869	0.0627	0.9315	0.1496	0.0066	0.0034	0.0116	0.0604	0.2076	0.0188	<.0001	0.0854	<.0001	<.0001	0.0155	0.0308	0.2122	0.1853	0.5716
Vulnerability (Fish Base)/10	0.343	0.7694	0.4171	0.6772	0.3219	0.0025	0.8244	0.8471	0.641	0.3284	0.4234	0.2426	0.1191	0.5473	0.5475	0.1769	0.1987	0.1332	0.5307	0.526	0.739	0.8784	0.5656	0.2107	0.0145	0.3868	0.3834	0.3784	0.576	0.7511	0.4869	0.0627	0.9315	0.1496	0.0066	0.0034	0.0116	0.0604	0.2076	0.0188	<.0001	0.0854	<.0001	<.0001	0.0155	0.0308	0.2122	0.1853	0.5716
Resilience high (No of species, Fish Base)	0.2606	0.4378	0.2541	0.8749	0.4113	0.0587	0.377	0.7017	0.4058	0.0782	0.4556	0.2952	0.139	0.3545	0.3547	0.352	0.2687	0.2435	0.3688	0.9852	0.3191	0.6236	0.6679	0.5416	0.0346	0.6606	0.6188	0.6148	0.784	0.5911	0.5431	0.437	0.4396	0.4301	0.0013	0.0011	0.0038	0.3836	0.1145	0.0476	0.008	0.1429	0.0155	0.0155	<.0001	0.1453	0.0339	0.1861	0.8746
Resilience medium	0.4296	0.8647	0.3569	0.49	0.432	0.1022	0.5276	0.8387	0.3482	0.2013	0.6208	0.1763	0.6475	0.4744	0.4747	0.3465	0.0659	0.0542	0.2976	0.735	0.2906	0.3875	0.5739	0.1849	0.0033	0.1946	0.4895	0.4837	0.516	0.9186	0.3801	0.1237	0.4234	0.3612	0.0102	0.0913	0.0436	0.0274	0.4788	0.1889	0.0602	0.2784	0.0308	0.0308	0.1453	<.0001	0.1474	0.8177	0.0274
Resilience low	0.7437	0.9353	0.8049	0.4531	0.393	0.385	0.9051	0.9191	0.5986	0.1629	0.8535	0.2625	0.3893	0.7487	0.7489	0.6808	0.3533	0.4769	0.1859	0.2494	0.2867	0.0912	0.8422	0.4199	0.1009	0.5598	0.9418	0.9467	0.7738	0.9793	0.2839	0.4274	0.907	0.5533	0.0132	0.0844	0.0393	0.5181	0.161	0.2109	0.2102	0.0868	0.2122	0.2122	0.0339	0.1474	<.0001	0.5598	0.6037
Resilience very low	0.3381	0.7087	0.5804	0.6362	0.5914	0.305	0.4851	0.6754	0.8304	0.6703	0.0622	0.6443	0.5659	0.7389	0.7388	0.2386	0.73	0.5629	0.5376	0.5733	0.6227	0.635	0.64	0.5562	0.554	0.521	0.868	0.8657	0.5916	0.5	0.6605	0.6963	0.1851	0.5248	0.3296	0.2605	0.3236	0.8799	0.1903	0.03	0.1658	0.1799	0.1853	0.1853	0.1861	0.8177	0.5598	<.0001	0.6382
Resilience high %	0.9377	0.6007	0.8106	0.4741	0.6935	0.7362	0.0953	0.9496	0.63	0.8477	0.8785	0.371	0.5353	0.9779	0.9777	0.7377	0.1943	0.3753	0.589	0.4771	0.585	0.3417	0.2247	0.2827	0.2126	0.3529	0.8548	0.8511	0.6795	0.6194	0.4349	0.3306	0.1329	0.6824	0.4236	0.9322	0.6254	0.136	0.8643	0.8125	0.7635	0.7135	0.5716	0.5716	0.8746	0.0274	0.6037	0.6382	<.0001
Resilience medium %	0.7819	0.5752	0.9412	0.8128	0.8413	0.7657	0.1021	0.9692	0.9375	0.6298	0.841	0.8942	0.2669	0.8425	0.8424	0.9163	0.5592	0.5766	0.8754	0.8777	0.9745	0.8895	0.2275	0.7183	0.8481	0.5114	0.8202	0.819	0.842	0.6622	0.9407	0.7193	0.1102	0.9922	0.6711	0.3691	0.5484	0.3443	0.2821	0.4884	0.6015	0.4962	0.8031	0.8031	0.1871	0.3383	0.3805	0.2584	0.0128
Resilience low %	0.6762	0.8414	0.8821	0.3387	0.3343	0.3539	0.9204	0.9484	0.44	0.1456	0.8152	0.2126	0.4618	0.6863	0.6866	0.6114	0.3046	0.514	0.1247	0.25	0.2261	0.0957	0.9683	0.2969	0.0743	0.5771	0.9575	0.9623	0.6195	0.813	0.2451	0.3552	0.9369	0.5832	0.0139	0.0948	0.0421	0.4916	0.165	0.188	0.2146	0.0726	0.2262	0.2262	0.0496	0.1132	<.0001	0.5762	0.4622
Resilience very low %	0.3381	0.7087	0.5804	0.6362	0.5914	0.305	0.4851	0.6754	0.8304	0.6703	0.0622	0.6443	0.5659	0.7389	0.7388	0.2386	0.73	0.5629	0.5376	0.5733	0.6227	0.635	0.64	0.5562	0.554	0.521	0.868	0.8657	0.5916	0.5	0.6605	0.6963	0.1851	0.5248	0.3296	0.2605	0.3236	0.8799	0.1903	0.03	0.1658	0.1799	0.1853	0.1853	0.1861	0.8177	0.5598	<.0001	0.6382
Substrate complexity high (number of species, RLS Team)	0.4361	0.3149	0.8908	0.9216	0.6881	0.9201	0.7864	0.2956	0.5834	0.9753	0.2516	0.809	0.8276	0.9282	0.9281	0.262	0.8472	0.7954	1	0.1611	0.9469	0.1538	0.1755	0.4027	0.6117	0.7385	0.9675	0.9649	0.5222	0.7692	0.9537	0.6786	0.8315	0.8229	0.1684	0.4908	0.3738	0.9295	0.019	0.1215	0.4662	0.1493	0.3938	0.3938	0.1633	0.4982	0.0443	0.1627	0.8338
Substrate complexity medium	0.2516	0.4161	0.1586	0.7785	0.0938	0.0204	0.6532	0.3652	0.1451	0.0895	0.2946	0.03	0.3099	0.5318	0.5321	0.3731	0.0315	0.3285	0.361	0.9499	0.1297	0.5566	0.4818	0.4081	0.0001	0.4933	0.9508	0.9457	0.6218	0.8539	0.1311	0.2733	0.7398	0.1427	0.0041	0.0043	0.0012	0.0436	0.4722	0.0703	0.0101	0.2679	0.0146	0.0146	0.0221	0.0139	0.1424	0.3079	0.3287
Substrate complexity low	0.4812	0.8077	0.5084	0.5118	0.7351	0.1741	0.9152	0.8614	0.6017	0.1138	0.849	0.4696	0.3069	0.3455	0.3457	0.3983	0.303	0.0546	0.2143	0.6586	0.4135	0.3164	0.6023	0.3042	0.0474	0.3615	0.3611	0.3566	0.6496	0.8157	0.7193	0.2639	0.858	0.6675	0.0008	0.0334	0.0284	0.3452	0.1056	0.1327	0.0481	0.1021	0.0351	0.0351	0.0068	0.0347	0.0057	0.5824	0.5289
Substrate complexity high %	0.568	0.3907	0.5112	0.9278	0.2457	0.8387	0.8789	0.1787	0.2922	0.6216	0.595	0.1655	0.8878	0.7535	0.7533	0.2448	0.1417	0.905	0.8265	0.7001	0.4361	0.8492	0.1485	0.4796	0.6418	0.8049	0.6183	0.6163	0.6884	0.9644	0.2749	0.7116	0.9827	0.4435	0.7171	0.948	0.9902	0.4235	0.0213	0.2931	0.8113	0.3667	0.7732	0.7732	0.5253	0.7273	0.3726	0.3393	0.4226
Substrate complexity medium %	0.4612	0.8711	0.9749	0.5775	0.4058	0.578	0.8851	0.4441	0.8892	0.4696	0.9558	0.5516	0.7211	0.2408	0.2408	0.2418	0.845	0.075	0.4193	0.7416	0.9673	0.5717	0.2659	0.2437	0.4824	0.4012	0.1358	0.1335	0.7394	0.9442	0.4039	0.3475	0.5226	0.5828	0.1073	0.3528	0.3875	0.9608	0.0266	0.2323	0.2754	0.1977	0.221	0.221	0.124	0.2906	0.0867	0.7165	0.8769
Substrate complexity low %	0.4861	0.9057	0.8335	0.4593	0.5522	0.4317	0.8103	0.6482	0.8306	0.2561	0.8936	0.8098	0.6141	0.1716	0.1716	0.3189	0.7846	0.0158	0.2595	0.7924	0.7292	0.5253	0.4052	0.2401	0.2738	0.3367	0.0887	0.0867	0.5643	0.944	0.534	0.3004	0.4242	0.6953	0.0507	0.246	0.2723	0.7156	0.078	0.2857	0.1957	0.2143	0.1474	0.1474	0.091	0.1223	0.0748	0.9229	0.6168
Total Biomass (g)	0.6195	0.6931	0.2132	0.5509	0.4748	0.0672	0.8777	0.5441	0.673	0.738	0.4056	0.4194	0.2106	0.9287	0.9286	0.438	0.4054	0.2263	0.6701	0.6895	0.965	0.9598	0.4947	0.8658	0.1285	0.2203	0.8543	0.8469	0.675	0.2555	0.5145	0.2809	0.5656	0.0504	0.1165	0.0568	0.0651	0.0263	0.5827	0.1775	0.027	0.545	0.0097	0.0097	0.1306	0.1574	0.5821	0.3384	0.7741
Total Biomass tonnes / hectare	0.4695	0.5112	0.9175	0.8668	0.8687	0.6498	0.8131	0.4443	0.6637	0.335	0.1678	0.8907	0.9563	0.7684	0.7684	0.2612	0.9258	0.5878	0.5122	0.4347	0.2763	0.4363	0.5736	0.3843	0.9805	0.2893	0.7004	0.7056	0.6989	0.6824	0.8344	0.7804	0.5119	0.8753	0.6215	0.7384	0.8696	0.6578	0.2297	0.1094	0.436	0.1841	0.4169	0.4169	0.5087	0.954	0.8276	0.0026	0.8337
Biomass <10cm %	0.265	0.8891	0.0333	0.3783	0.8657	0.2834	0.9142	0.9233	0.8929	0.2651	0.2978	0.5774	0.7169	0.53	0.5302	0.3953	0.3928	0.0673	0.91	0.4948	0.3257	0.2615	0.8612	0.9919	0.0587	0.0817	0.9045	0.8962	0.5084	0.2954	0.7213	0.6361	0.7116	0.3506	0.0336	0.0831	0.0336	0.0597	0.3935	0.2611	0.1009	0.9272	0.058	0.058	0.0643	0.0537	0.2517	0.6674	0.5075
≤10	0.269	0.4631	0.47	0.5077	0.2749	0.0011	0.5466	0.8638	0.3672	0.2173	0.4406	0.2055	0.1015	0.3919	0.3921	0.1703	0.1621	0.1898	0.3406	0.4113	0.6134	0.7542	0.6548	0.1574	0.0129	0.6383	0.31	0.3068	0.3809	0.9249	0.5061	0.0814	0.8943	0.253	0.0056	0.0017	0.013	0.1516	0.1796	0.0126	<.0001	0.0516	<.0001	<.0001	0.0074	0.0491	0.1954	0.1408	0.6891
≤12.5-≥20	0.3179	0.8955	0.1005	0.5789	0.6539	0.0757	0.9757	0.821	0.9955	0.3965	0.312	0.4743	0.3578	0.629	0.6292	0.2818	0.3418	0.075	0.9254	0.97	0.6405	0.7035	0.7435	0.7228	0.0457	0.1392	0.6644	0.6568	0.7422	0.3267	0.6645	0.3102	0.7143	0.1742	0.0266	0.03	0.024	0.0321	0.3455	0.1165	0.0157	0.5504	0.0047	0.0047	0.0435	0.0503	0.337	0.3908	0.5978
≥25	0.8413	0.9958	0.2987	0.7805	0.7671	0.9522	0.9072	0.9026	0.9753	0.194	0.8667	0.9186	0.5918	0.5819	0.582	0.8975	0.6607	0.1927	0.6232	0.2831	0.4338	0.1099	0.6051	0.6949	0.4495	0.5629	0.8168	0.8136	0.5959	0.3106	0.9839	0.7499	0.5796	0.9202	0.1008	0.2826	0.2198	0.9215	0.3767	0.7678	0.529	0.6965	0.4755	0.4755	0.0709	0.4184	0.0365	0.9883	0.8812
Total Biomass Reef	0.62	0.6198	0.2744	0.7701	0.4415	0.0698	0.7804	0.4401	0.7109	0.5863	0.4235	0.3429	0.1756	0.9534	0.9533	0.3994	0.3347	0.2034	0.9432	0.988	0.9216	0.6815	0.42	0.6595	0.0726	0.2414	0.8475	0.8401	0.7185	0.2865	0.4138	0.2297	0.5841	0.0746	0.023	0.0225	0.0196	0.0485	0.3117	0.0907	0.0141	0.246	0.0034	0.0034	0.0359	0.0851	0.1745	0.246	0.6872
Total Biomass Mangrove	0.9767	0.9646	0.4334	0.8776	0.3783	0.1626	0.6501	0.8317	0.9277	0.4238	0.9548	0.3478	0.2758	0.968	0.9682	0.8798	0.4392	0.1393	0.8847	0.9546	0.6072	0.7129	0.7931	0.9646	0.1472	0.0469	0.9925	0.9821	0.9513	0.6106	0.3977	0.2698	0.8958	0.0473	0.2808	0.1662	0.1373	0.0066	0.8876	0.7027	0.1793	0.9741	0.1225	0.1225	0.4245	0.1575	0.677	0.6797	0.5131
Total Biomass Seagrass	0.1748	0.1093	0.4147	0.6016	0.249	0.1408	0.1523	0.1441	0.0447	0.0125	0.4654	0.1847	0.3689	0.2031	0.2033	0.4244	0.2678	0.5758	0.1148	0.7191	0.041	0.443	0.6012	0.4725	0.0355	0.8551	0.9194	0.9163	0.4467	0.7844	0.3837	0.595	0.6109	0.6909	0.0212	0.0184	0.0171	0.6001	0.1955	0.1143	0.0888	0.2596	0.1815	0.1815	0.0082	0.2414	0.044	0.3747	0.9739
Abudefduf saxatilis	0.789	0.5717	0.9294	0.482	0.2079	0.0201	0.9986	0.887	0.5579	0.5212	0.9655	0.2591	0.2395	0.7108	0.711	0.4841	0.3695	0.2636	0.5298	0.3331	0.7646	0.4714	0.9419	0.3373	0.1163	0.2119	0.5486	0.5414	0.2431	0.6454	0.4369	0.0371	0.4623	0.0765	0.4136	0.1818	0.2491	0.0139	0.932	0.4106	0.086	0.5799	0.0795	0.0795	0.6249	0.1552	0.8905	0.9447	0.3904
Acanthurus bahianus	0.9708	0.8951	0.4143	0.9692	0.8407	0.7943	0.81	0.9781	0.8869	0.1034	0.6716	0.6119	0.4706	0.6556	0.6557	0.756	0.5772	0.1812	0.4287	0.184	0.2417	0.0559	0.7599	0.6998	0.2995	0.2744	0.9368	0.9433	0.8066	0.4986	0.642	0.9992	0.7782	0.683	0.1101	0.2267	0.141	0.5319	0.5829	0.9061	0.5229	0.7827	0.4798	0.4798	0.1189	0.3212	0.0326	0.6173	0.9123
Acanthurus chirurgus	0.9013	0.7021	0.5712	0.6324	0.5966	0.3065	0.5776	0.6681	0.6167	0.8764	0.8928	0.6449	0.5621	0.7409	0.7408	0.8529	0.7052	0.3869	0.5397	0.586	0.8177	0.6523	0.8471	0.8817	0.4994	0.1527	0.9914	0.9838	0.886	0.6281	0.659	0.3654	0.8395	0.0877	0.875	0.583	0.5854	0.0286	0.5426	0.9124	0.4123	0.6761	0.3016	0.3016	0.9355	0.4343	0.4771	0.7627	0.556
Acanthurus coeruleus	0.4291	0.4361	0.0845	0.6012	0.3155	0.3412	0.7188	0.203	0.2802	0.0462	0.5941	0.2032	0.6997	0.5018	0.502	0.8737	0.2844	0.2729	0.6145	0.3193	0.019	0.1603	0.2745	0.6984	0.045	0.0981	0.5486	0.5563	0.912	0.7187	0.2747	0.829	0.7493	0.2287	0.1508	0.1207	0.0415	0.0494	0.9889	0.6932	0.3057	0.6462	0.3243	0.3243	0.2174	0.1467	0.3676	0.6912	0.5383
Anisotremus virginicus	0.7109	0.8719	0.049	0.002	0.606	0.6206	0.4782	0.7528	0.5244	0.86	0.423	0.6406	0.8877	0.8027	0.8028	0.6997	0.7702	0.8275	0.066	0.9777	0.9885	0.9902	0.993	0.0224	0.6464	0.8838	0.4431	0.4414	0.0386	0.036	0.6958	0.0776	0.0272	0.9223	0.7757	0.9674	0.9634	0.8545	0.6979	0.7289	0.8647	0.1263	0.8653	0.8653	0.7665	0.4287	0.4941	0.6533	0.1786
Apogon townsendi	0.0415	0.5453	0.895	0.8603	0.5622	0.4827	0.4297	0.4966	0.3916	0.9602	0.22	0.475	0.3455	0.1125	0.1125	0.0182	0.5472	0.568	0.8759	0.5692	0.7845	0.3946	0.4462	0.1187	0.6488	0.4265	0.2962	0.2935	0.3872	0.1453	0.309	0.272	0.1798	0.55	0.9882	0.9893	0.9456	0.6634	0.3341	0.277	0.5801	0.9003	0.6325	0.6325	0.8444	0.6134	0.3953	0.7855	0.5825
Aulostomus maculatus	0.8599	0.7087	0.5804	0.6362	0.0117	0.3693	0.5866	0.6754	0.5952	0.6081	0.7819	0.0956	0.3791	0.5228	0.5226	0.962	0.7701	0.2815	0.5376	0.5733	0.3715	0.6112	0.7188	0.8301	0.4155	0.6692	0.0903	0.0923	0.6555	0.514	0.0216	0.4303	0.6672	0.059	0.7513	0.3574	0.2673	0.3287	1	0.5733	0.6231	0.567	0.7872	0.7872	0.7494	0.9771	0.4619	0.7681	0.9183
Bodianus rufus	0.7823	0.7087	0.5804	0.9267	0.8833	0.9805	0.5866	0.6754	0.7772	0.2915	0.7168	0.6798	0.5659	0.9956	0.9956	0.6958	0.709	0.3775	0.6008	0.1052	0.4316	0.0303	0.64	0.6928	0.4654	0.3654	0.7144	0.7196	0.5904	0.4406	0.5754	0.9388	0.7027	0.6854	0.1648	0.3574	0.2163	0.6701	0.5371	0.9115	0.6943	0.6683	0.6126	0.6126	0.1861	0.4428	0.0186	0.7681	0.9183
Canthigaster rostrata	0.5379	0.419	0.9364	0.4202	0.0011	0.2483	0.9156	0.4282	0.3135	0.2996	0.6658	0.0068	0.2005	0.605	0.6046	0.4914	0.1715	0.7556	0.2992	0.879	0.248	0.6939	0.5415	0.9982	0.2055	0.7242	0.2872	0.2901	0.3991	0.7025	0.0052	0.4667	0.8603	0.0289	0.5925	0.275	0.227	0.1424	0.3886	0.9944	0.526	0.6884	0.6326	0.6326	0.7428	0.5205	0.5704	0.7175	0.6123
Carangoides ruber	0.8882	0.6469	0.5164	0.6063	0.6636	0.3254	0.5129	0.6027	0.5619	0.9313	0.9308	0.6778	0.5465	0.7658	0.7657	0.8691	0.6973	0.2962	0.5499	0.6715	0.8337	0.7677	0.7783	0.8496	0.4746	0.119	0.9518	0.9438	0.8234	0.548	0.6932	0.38	0.8445	0.096	0.7798	0.5452	0.5348	0.0267	0.5973	0.9157	0.3938	0.6922	0.2718	0.2718	0.9736	0.3818	0.5851	0.7293	0.5435
Cephalopholis cruentata	0.4732	0.9742	0.2411	0.5471	0.0979	0.8982	0.8594	0.7999	0.7844	0.7865	0.9517	0.2791	0.8827	0.245	0.2449	0.5627	0.9896	0.0236	0.7301	0.5711	0.7525	0.7447	0.5735	0.9652	0.8663	0.6124	0.0567	0.0564	0.7577	0.3913	0.0836	0.9137	0.7777	0.4028	0.5506	0.8252	0.967	0.9471	0.6232	0.8801	0.5646	0.7454	0.4273	0.4273	0.5256	0.4746	0.8351	0.9149	0.9194
Chaetodipterus faber	0.3381	0.7087	0.5804	0.6362	0.5914	0.305	0.4851	0.6754	0.8304	0.6703	0.0622	0.6443	0.5659	0.7389	0.7388	0.2386	0.73	0.5629	0.5376	0.5733	0.6227	0.635	0.64	0.5562	0.554	0.521	0.868	0.8657	0.5916	0.5	0.6605	0.6963	0.1851	0.5248	0.3296	0.2605	0.3236	0.8799	0.1903	0.03	0.1658	0.1799	0.1853	0.1853	0.1861	0.8177	0.5598	<.0001	0.6382
Chaetodon capistratus	0.132	0.168	0.9972	0.6213	0.7471	0.3927	0.1064	0.4696	0.3041	0.0661	0.7977	0.6743	0.6111	0.0178	0.0178	0.1922	0.6072	0.2484	0.1645	0.8458	0.2624	0.7687	0.6488	0.3903	0.4099	0.4572	0.3009	0.2969	0.3711	0.4712	0.4528	0.5085	0.8108	0.541	0.2037	0.1933	0.2717	0.8542	0.0299	0.226	0.2655	0.4906	0.3974	0.3974	0.0796	0.6935	0.1976	0.8258	0.4315
Chaetodon ocellatus	0.8682	0.4071	0.8449	0.4655	0.0528	0.3102	0.7408	0.3495	0.2592	0.9518	0.9068	0.0908	0.6069	0.6641	0.6638	0.8657	0.2322	0.4193	0.6769	0.3171	0.7631	0.3477	0.3302	0.6585	0.5137	0.5609	0.6699	0.6678	0.3128	0.4983	0.1473	0.5388	0.9586	0.2478	0.843	0.7501	0.8256	0.4211	0.293	0.8852	0.6885	0.7892	0.8126	0.8126	0.6886	0.7842	0.4734	0.8	0.54
Chaetodon striatus	0.6463	0.1977	0.3596	0.9431	0.6143	0.661	0.4136	0.2206	0.2354	0.0054	0.7908	0.477	0.4743	0.2779	0.2781	0.8152	0.5418	0.3401	0.1978	0.3075	0.0307	0.1402	0.7734	0.6774	0.2387	0.5058	0.896	0.9008	0.81	0.8473	0.6294	0.8145	0.6326	0.8765	0.1544	0.1629	0.1227	0.7529	0.6341	0.8825	0.517	0.9681	0.6376	0.6376	0.0919	0.5036	0.085	0.6311	0.7565
Chromis multilineata	0.3293	0.0001	0.5804	0.7754	0.5914	0.4233	0.0149	0.0036	0.0153	0.0314	0.9387	0.6443	0.5659	0.0752	0.0752	0.9022	0.709	0.7035	0.2146	0.5733	0.0843	0.6834	0.4785	0.9056	0.4732	0.8679	0.6697	0.6694	0.2505	0.5527	0.9418	0.8561	0.7783	0.8082	0.7127	0.3574	0.5211	0.9039	1	0.9115	0.5651	0.7266	0.862	0.862	0.4202	0.9771	0.9428	0.7681	0.4212
Coryphopterus glaucofraenum	0.5583	0.1593	0.3772	0.9358	0.3372	0.088	0.3638	0.2643	0.3132	0.1683	0.9531	0.3896	0.2738	0.378	0.3781	0.7653	0.4883	0.261	0.6329	0.4391	0.3152	0.6009	0.8169	0.9252	0.1861	0.2746	0.7399	0.7331	0.4742	0.9997	0.6622	0.4544	0.9589	0.2059	0.5151	0.1583	0.2348	0.0935	0.7466	0.7355	0.1778	0.7174	0.2312	0.2312	0.4572	0.4282	0.7391	0.7147	0.9698
Coryphopterus personatus	0.3094	0.8671	0.7918	0.7758	0.3307	0.0721	0.3892	0.8492	0.7376	0.848	0.1633	0.3794	0.2625	0.9189	0.9191	0.1676	0.4964	0.8847	0.8225	0.4567	0.8956	0.6042	0.5744	0.2248	0.2392	0.6656	0.7988	0.799	0.7946	0.8691	0.5066	0.2886	0.4124	0.4088	0.1217	0.0718	0.1322	0.6644	0.1108	0.0049	0.0339	0.0319	0.0541	0.0541	0.0633	0.4865	0.2976	0.0008	0.799
Diodon hystrix	0.7823	0.7087	0.5804	0.9267	0.8833	0.9805	0.5866	0.6754	0.7772	0.2915	0.7168	0.6798	0.5659	0.9956	0.9956	0.6958	0.709	0.3775	0.6008	0.1052	0.4316	0.0303	0.64	0.6928	0.4654	0.3654	0.7144	0.7196	0.5904	0.4406	0.5754	0.9388	0.7027	0.6854	0.1648	0.3574	0.2163	0.6701	0.5371	0.9115	0.6943	0.6683	0.6126	0.6126	0.1861	0.4428	0.0186	0.7681	0.9183
Echeneis neucratoides	0.7823	0.7087	0.5804	0.9267	0.8833	0.9805	0.5866	0.6754	0.7772	0.2915	0.7168	0.6798	0.5659	0.9956	0.9956	0.6958	0.709	0.3775	0.6008	0.1052	0.4316	0.0303	0.64	0.6928	0.4654	0.3654	0.7144	0.7196	0.5904	0.4406	0.5754	0.9388	0.7027	0.6854	0.1648	0.3574	0.2163	0.6701	0.5371	0.9115	0.6943	0.6683	0.6126	0.6126	0.1861	0.4428	0.0186	0.7681	0.9183
Elacatinus xanthiprora	0.6238	0.574	0.4008	0.4745	0.4152	0.1002	0.9834	0.5278	0.5759	0.6772	0.2201	0.4854	0.3823	0.6167	0.6166	0.3664	0.5871	0.7394	0.3466	0.3917	0.6037	0.4729	0.6481	0.8019	0.332	0.4745	0.9209	0.9257	0.6486	0.3986	0.5059	0.2962	0.5356	0.0462	0.4633	0.2263	0.2662	0.0597	0.7953	0.1827	0.0921	0.6599	0.0595	0.0595	0.4745	0.4192	0.8061	0.1738	0.8464
Equetus punctatus	0.7823	0.7087	0.5804	0.9267	0.8833	0.9805	0.5866	0.6754	0.7772	0.2915	0.7168	0.6798	0.5659	0.9956	0.9956	0.6958	0.709	0.3775	0.6008	0.1052	0.4316	0.0303	0.64	0.6928	0.4654	0.3654	0.7144	0.7196	0.5904	0.4406	0.5754	0.9388	0.7027	0.6854	0.1648	0.3574	0.2163	0.6701	0.5371	0.9115	0.6943	0.6683	0.6126	0.6126	0.1861	0.4428	0.0186	0.7681	0.9183
Ginglymostoma cirratum	0.6664	0.7385	0.0469	0.0002	0.5914	0.417	0.5866	0.6754	0.5485	0.8341	0.3255	0.6443	0.5659	0.7358	0.7359	0.692	0.709	0.6852	0.0544	0.5733	0.8127	0.635	0.666	0.0172	0.6393	0.9807	0.2319	0.231	0.0148	0.0621	0.8017	0.0471	0.0437	0.9834	0.7127	0.8592	1	0.8799	0.6837	0.654	0.6411	0.0659	0.6523	0.6523	0.922	0.4428	0.5598	0.7681	0.3007
Gymnothorax funebris	0.3381	0.7087	0.5804	0.6362	0.5914	0.305	0.4851	0.6754	0.8304	0.6703	0.0622	0.6443	0.5659	0.7389	0.7388	0.2386	0.73	0.5629	0.5376	0.5733	0.6227	0.635	0.64	0.5562	0.554	0.521	0.868	0.8657	0.5916	0.5	0.6605	0.6963	0.1851	0.5248	0.3296	0.2605	0.3236	0.8799	0.1903	0.03	0.1658	0.1799	0.1853	0.1853	0.1861	0.8177	0.5598	<.0001	0.6382
Haemulon carbonarium	0.7183	0.4118	0.4212	0.7694	0.4352	0.1548	0.6431	0.5008	0.6103	0.4516	0.9261	0.5038	0.403	0.6334	0.6335	0.8109	0.5903	0.3216	0.984	0.4122	0.5818	0.5138	0.858	0.8485	0.3151	0.2341	0.8251	0.8182	0.6702	0.8917	0.7094	0.459	0.9606	0.1652	0.753	0.3264	0.4064	0.0645	0.5672	0.8735	0.283	0.5681	0.2963	0.2963	0.7609	0.4871	0.4716	0.6713	0.8869
Haemulon flavolineatum	0.3467	0.8888	0.4654	0.8794	0.5446	0.6218	0.767	0.7874	0.5596	0.9078	0.5342	0.8891	0.5484	0.4248	0.4248	0.3433	0.4152	0.3031	0.9551	0.3343	0.8303	0.4389	0.5331	0.3332	0.5621	0.8776	0.1233	0.1246	0.6916	0.9283	0.4722	0.672	0.4093	0.55	0.6673	0.9994	0.9248	0.725	0.8847	0.5744	0.5479	0.8705	0.4516	0.4516	0.9582	0.2392	0.5462	0.6766	0.1971
Haemulon macrostomum	0.9042	0.7087	0.5804	0.6362	0.5914	0.305	0.5866	0.6754	0.6229	0.8667	0.8875	0.6443	0.5659	0.7389	0.7388	0.8488	0.709	0.3997	0.5376	0.5733	0.8127	0.635	0.8547	0.8877	0.5049	0.1582	0.9935	0.9861	0.8947	0.6401	0.6585	0.3635	0.8371	0.088	0.8895	0.5902	0.595	0.0294	0.5371	0.9115	0.4157	0.6743	0.3063	0.3063	0.922	0.4428	0.4619	0.7681	0.5586
Haemulon plumierii	0.335	0.7171	0.5279	0.6551	0.5407	0.2667	0.5028	0.6707	0.853	0.8017	0.0679	0.5714	0.4921	0.7684	0.7683	0.2425	0.6648	0.6561	0.6164	0.6783	0.7226	0.7817	0.6136	0.5562	0.451	0.609	0.8504	0.8488	0.5862	0.4622	0.588	0.6612	0.1721	0.4662	0.2261	0.1828	0.2238	0.8004	0.1532	0.0216	0.1246	0.1459	0.1394	0.1394	0.1153	0.7113	0.4004	<.0001	0.6623
Haemulon sciurus	0.8079	0.6848	0.5631	0.9206	0.8557	0.9747	0.5685	0.6895	0.7978	0.2965	0.7712	0.6439	0.605	0.9742	0.9741	0.7156	0.6782	0.4025	0.6056	0.0862	0.4071	0.0217	0.7033	0.715	0.4388	0.3658	0.6693	0.6744	0.5725	0.4487	0.5329	0.94	0.7017	0.6749	0.1537	0.3571	0.2035	0.6493	0.5264	0.8817	0.6959	0.6559	0.6122	0.6122	0.1854	0.4151	0.0148	0.801	0.8607
Halichoeres bivittatus	0.9761	0.7797	0.5112	0.5956	0.6346	0.2578	0.7042	0.6909	0.6379	0.9266	0.8664	0.6923	0.478	0.9051	0.905	0.762	0.7788	0.2782	0.6178	0.6817	0.9472	0.7714	0.7386	0.873	0.4217	0.0888	0.9487	0.9398	0.8741	0.5963	0.7144	0.3443	0.8998	0.09	0.7072	0.4307	0.4354	0.0257	0.736	0.8018	0.3168	0.7152	0.2293	0.2293	0.834	0.4032	0.6536	0.7764	0.6834
Holacanthus ciliaris	0.5433	0.9679	0.6424	0.8685	0.527	0.8682	0.6212	0.294	0.2442	0.5242	0.4602	0.3332	0.2192	0.8805	0.8807	0.7944	0.4071	0.9385	0.5881	0.0729	0.0819	0.0668	0.0045	0.6404	0.2763	0.4595	0.3419	0.3441	0.9429	0.4466	0.2721	0.8985	0.4802	0.8891	0.6067	0.9784	0.5628	0.3658	0.9378	0.8863	0.8187	0.7928	0.8381	0.8381	0.8738	0.2308	0.506	0.681	0.0384
Holocentrus rufus	0.3381	0.7087	0.5804	0.6362	0.5914	0.305	0.4851	0.6754	0.8304	0.6703	0.0622	0.6443	0.5659	0.7389	0.7388	0.2386	0.73	0.5629	0.5376	0.5733	0.6227	0.635	0.64	0.5562	0.554	0.521	0.868	0.8657	0.5916	0.5	0.6605	0.6963	0.1851	0.5248	0.3296	0.2605	0.3236	0.8799	0.1903	0.03	0.1658	0.1799	0.1853	0.1853	0.1861	0.8177	0.5598	<.0001	0.6382
Hypoplectrus nigricans	0.1514	0.258	0.4168	0.8918	0.3521	0.0779	0.047	0.3925	0.3169	0.4807	0.1609	0.4216	0.2898	0.5195	0.5196	0.2581	0.51	0.8955	0.8408	0.269	0.6868	0.3802	0.9396	0.5913	0.2727	0.5588	0.8024	0.8037	0.7414	0.8288	0.6944	0.6601	0.2222	0.552	0.2532	0.0717	0.1707	0.7893	0.3075	0.0502	0.0587	0.3231	0.1335	0.1335	0.0771	0.751	0.7178	0.0196	0.423
Hypoplectrus puella	0.2367	0.6017	0.1745	0.4357	0.4173	0.0378	0.2728	0.7458	0.7932	0.4763	0.2108	0.4897	0.2209	0.6308	0.6309	0.2851	0.6078	0.4536	0.7581	0.4464	0.6955	0.6043	0.7348	0.9548	0.1573	0.4092	0.9036	0.8975	0.8722	0.4482	0.6734	0.4429	0.3247	0.1269	0.2095	0.0347	0.0695	0.1199	0.4929	0.1182	0.0228	0.7673	0.0318	0.0318	0.0967	0.4362	0.8748	0.2147	0.6357
Hypoplectrus unicolor	0.3381	0.7087	0.5804	0.6362	0.5914	0.305	0.4851	0.6754	0.8304	0.6703	0.0622	0.6443	0.5659	0.7389	0.7388	0.2386	0.73	0.5629	0.5376	0.5733	0.6227	0.635	0.64	0.5562	0.554	0.521	0.868	0.8657	0.5916	0.5	0.6605	0.6963	0.1851	0.5248	0.3296	0.2605	0.3236	0.8799	0.1903	0.03	0.1658	0.1799	0.1853	0.1853	0.1861	0.8177	0.5598	<.0001	0.6382
Lucayablennius zingaro	0.3293	0.0001	0.5804	0.7754	0.5914	0.4233	0.0149	0.0036	0.0153	0.0314	0.9387	0.6443	0.5659	0.0752	0.0752	0.9022	0.709	0.7035	0.2146	0.5733	0.0843	0.6834	0.4785	0.9056	0.4732	0.8679	0.6697	0.6694	0.2505	0.5527	0.9418	0.8561	0.7783	0.8082	0.7127	0.3574	0.5211	0.9039	1	0.9115	0.5651	0.7266	0.862	0.862	0.4202	0.9771	0.9428	0.7681	0.4212
Lutjanus apodus	0.6664	0.7385	0.0469	0.0002	0.5914	0.417	0.5866	0.6754	0.5485	0.8341	0.3255	0.6443	0.5659	0.7358	0.7359	0.692	0.709	0.6852	0.0544	0.5733	0.8127	0.635	0.666	0.0172	0.6393	0.9807	0.2319	0.231	0.0148	0.0621	0.8017	0.0471	0.0437	0.9834	0.7127	0.8592	1	0.8799	0.6837	0.654	0.6411	0.0659	0.6523	0.6523	0.922	0.4428	0.5598	0.7681	0.3007
Lutjanus griseus	0.7325	0.7869	0.0648	0.001	0.5705	0.5024	0.5182	0.7843	0.4738	0.849	0.421	0.5899	0.7828	0.7652	0.7653	0.6769	0.6584	0.7641	0.063	0.7584	0.9519	0.8038	0.9535	0.0164	0.5959	0.9726	0.336	0.3349	0.0237	0.0445	0.7118	0.0625	0.0307	0.9574	0.7378	0.9567	0.9853	0.8209	0.7353	0.6808	0.7464	0.1027	0.75	0.75	0.8167	0.3861	0.5659	0.727	0.1778
Lutjanus jocu	0.8613	0.9012	0.535	0.9511	0.8363	0.9512	0.7395	0.8494	0.9404	0.1934	0.7082	0.6399	0.5193	0.8684	0.8685	0.7038	0.676	0.3489	0.5082	0.1214	0.3275	0.0351	0.6943	0.6807	0.4122	0.3723	0.7479	0.7533	0.675	0.4789	0.5781	0.9225	0.6772	0.7032	0.1455	0.2984	0.1819	0.6776	0.5339	0.9011	0.6453	0.6946	0.596	0.596	0.1478	0.4411	0.0179	0.7413	0.9863
Lutjanus synagris	0.6664	0.7385	0.0469	0.0002	0.5914	0.417	0.5866	0.6754	0.5485	0.8341	0.3255	0.6443	0.5659	0.7358	0.7359	0.692	0.709	0.6852	0.0544	0.5733	0.8127	0.635	0.666	0.0172	0.6393	0.9807	0.2319	0.231	0.0148	0.0621	0.8017	0.0471	0.0437	0.9834	0.7127	0.8592	1	0.8799	0.6837	0.654	0.6411	0.0659	0.6523	0.6523	0.922	0.4428	0.5598	0.7681	0.3007
Malacoctenus triangulatus	0.798	0.5868	0.4172	0.6286	0.567	0.3571	0.4251	0.5417	0.5451	0.7075	0.9526	0.5173	0.3989	0.7573	0.7572	0.9769	0.5872	0.1973	0.7745	0.8037	0.8535	0.6128	0.6785	0.7358	0.3069	0.0532	0.8541	0.8638	0.6866	0.3971	0.4786	0.4318	0.9916	0.065	0.4111	0.3185	0.2476	0.0194	0.8107	0.8724	0.3313	0.8728	0.2139	0.2139	0.5752	0.2524	0.7475	0.6688	0.5534
Microspathodon chrysurus	0.9272	0.5552	0.7275	0.5055	0.0046	0.1315	0.5209	0.6408	0.441	0.3618	0.7204	0.0497	0.2077	0.7734	0.7731	0.7934	0.5557	0.5977	0.3512	0.6974	0.2815	0.6354	0.8228	0.589	0.1672	0.5089	0.2393	0.2436	0.4793	0.5215	0.0191	0.2205	0.7389	0.0301	0.3829	0.122	0.0886	0.1715	0.7505	0.316	0.2713	0.3439	0.3909	0.3909	0.3988	0.6097	0.2803	0.6418	0.9671
Ocyurus chrysurus	0.4384	0.5995	0.4336	0.6223	0.5626	0.3365	0.6771	0.5555	0.741	0.9663	0.1296	0.5295	0.4156	0.7489	0.7488	0.3587	0.619	0.8684	0.726	0.9118	0.9005	0.7334	0.5094	0.7033	0.366	0.8303	0.7482	0.7484	0.4471	0.3135	0.5005	0.7359	0.1413	0.4259	0.1015	0.1171	0.115	0.7392	0.1108	0.0352	0.1238	0.1299	0.1226	0.1226	0.0411	0.5766	0.1276	0.0025	0.6882
Odontoscion dentex	0.6664	0.7385	0.0469	0.0002	0.5914	0.417	0.5866	0.6754	0.5485	0.8341	0.3255	0.6443	0.5659	0.7358	0.7359	0.692	0.709	0.6852	0.0544	0.5733	0.8127	0.635	0.666	0.0172	0.6393	0.9807	0.2319	0.231	0.0148	0.0621	0.8017	0.0471	0.0437	0.9834	0.7127	0.8592	1	0.8799	0.6837	0.654	0.6411	0.0659	0.6523	0.6523	0.922	0.4428	0.5598	0.7681	0.3007
Platybelone araglus	1	1	1	1	1	1	1	1	1	1	1	1	1	1	1	1	1	1	1	1	1	1	1	1	1	1	1	1	1	1	1	1	1	1	1	1	1	1	1	1	1	1	1	1	1	1	1	1	1
Pomacanthus arcuatus	0.7318	0.7602	0.6331	0.2175	0.4197	0.6944	0.4481	0.9882	0.4462	0.8074	0.5965	0.2982	0.6524	0.9576	0.9574	0.4797	0.3874	0.9236	0.3038	0.3181	0.4958	0.2694	0.308	0.08	0.2515	0.7744	0.8154	0.8173	0.4955	0.2668	0.2609	0.2667	0.2997	0.821	0.3314	0.7533	0.4827	0.5097	0.4811	0.3393	0.7129	0.1888	0.6729	0.6729	0.8098	0.1551	0.1751	0.7001	0.0399
Pseudupeneus maculatus	0.5834	0.6083	0.5867	0.9403	0.5093	0.3104	0.8832	0.4711	0.7891	0.7424	0.2994	0.4453	0.3161	0.816	0.8158	0.4261	0.5386	0.8933	0.921	0.7122	0.97	0.4924	0.4229	0.5609	0.2665	0.9834	0.8521	0.8539	0.6318	0.4198	0.4208	0.5575	0.2859	0.4094	0.0414	0.0803	0.0694	0.6621	0.0837	0.0447	0.1071	0.0572	0.0985	0.0985	0.0214	0.3982	0.0243	0.0279	0.8696
Pterois volitans	0.6664	0.7385	0.0469	0.0002	0.5914	0.417	0.5866	0.6754	0.5485	0.8341	0.3255	0.6443	0.5659	0.7358	0.7359	0.692	0.709	0.6852	0.0544	0.5733	0.8127	0.635	0.666	0.0172	0.6393	0.9807	0.2319	0.231	0.0148	0.0621	0.8017	0.0471	0.0437	0.9834	0.7127	0.8592	1	0.8799	0.6837	0.654	0.6411	0.0659	0.6523	0.6523	0.922	0.4428	0.5598	0.7681	0.3007
Scarus iseri	0.845	0.9012	0.2987	0.6077	0.4247	0.1264	0.8169	0.7983	0.8129	0.6074	0.7407	0.4147	0.2812	0.9742	0.974	0.7206	0.4829	0.2029	0.7881	0.7899	0.7986	0.993	0.7369	0.9001	0.1809	0.0921	0.9911	0.9818	0.8521	0.4372	0.4818	0.3215	0.8437	0.0392	0.32	0.1531	0.1488	0.0088	0.9407	0.5453	0.1267	0.983	0.082	0.082	0.3952	0.22	0.9039	0.9701	0.6807
Scomberomorus regalis	0.8336	0.9529	0.3305	0.0923	0.3235	0.0675	0.8805	0.4469	0.8131	0.8851	0.7699	0.3998	0.2887	0.9846	0.9844	0.2326	0.512	0.8539	0.3822	0.2986	0.5508	0.386	0.4594	0.0103	0.3173	0.9239	0.3766	0.3753	0.1763	0.3996	0.5288	0.0129	0.4766	0.4139	0.3105	0.2957	0.4322	0.4734	0.2995	0.0666	0.1044	0.0039	0.1029	0.1029	0.4742	0.2985	0.4856	0.1853	0.4804
Serranus tigrinus	0.3262	0.9423	0.8607	0.5234	0.7227	0.2147	0.7281	0.8222	0.638	0.9434	0.2819	0.591	0.5999	0.7256	0.7257	0.1757	0.3963	0.8605	0.6748	0.4497	0.7833	0.624	0.754	0.1022	0.3234	0.4774	0.3773	0.3796	0.6414	0.9641	0.8611	0.3519	0.8642	0.97	0.148	0.2568	0.355	0.9535	0.1321	0.0287	0.1143	0.0287	0.1224	0.1224	0.1578	0.3309	0.3408	0.0157	0.7351
Serranus tortugarum	0.3064	0.0013	0.4385	0.909	0.528	0.2592	0.027	0.0109	0.0332	0.0432	0.9675	0.5813	0.4622	0.0913	0.0914	0.8085	0.6268	0.5323	0.3216	0.4296	0.1181	0.5519	0.5354	0.8937	0.36	0.9045	0.6209	0.6192	0.2879	0.6867	0.9873	0.9701	0.7777	0.9064	0.6514	0.2621	0.419	0.7491	0.9276	0.8253	0.387	0.6744	0.6166	0.6166	0.395	0.8553	0.7917	0.8005	0.5007
Sparisoma aurofrenatum	0.7726	0.7297	0.3684	0.5205	0.0225	0.4419	0.5243	0.7996	0.6765	0.7656	0.86	0.1542	0.354	0.4729	0.4727	0.9458	0.9194	0.1639	0.5251	0.7079	0.5598	0.7865	0.9197	0.7546	0.6112	0.9565	0.1214	0.1229	0.5968	0.4526	0.0454	0.4603	0.6357	0.1213	0.8819	0.4519	0.4007	0.593	0.9152	0.5661	0.7119	0.4272	0.9049	0.9049	0.8078	0.7867	0.4789	0.637	0.7177
Sparisoma viride	0.4086	0.0805	0.1274	0.7142	0.5701	0.2321	0.2501	0.1028	0.1889	0.0346	0.9512	0.4887	0.3948	0.1877	0.1878	0.9108	0.431	0.1659	0.5478	0.7631	0.1112	0.9714	0.652	0.6264	0.1785	0.3636	0.7262	0.7209	0.6822	0.7446	0.8483	0.9313	0.7063	0.5148	0.3451	0.1398	0.1833	0.263	0.8718	0.8587	0.251	0.5534	0.3298	0.3298	0.2381	0.4258	0.9342	0.6476	0.8183
Stegastes adustus	0.2758	0.637	0.5379	0.4038	0.6008	0.7278	0.474	0.5924	0.6007	0.4805	0.1001	0.6077	0.966	0.9825	0.9824	0.2363	0.8142	0.7403	0.3225	0.4891	0.3801	0.4812	0.4944	0.7515	0.9397	0.4052	0.7232	0.7276	0.4116	0.3984	0.5442	0.8869	0.2436	0.7596	0.6105	0.638	0.7863	0.5739	0.1658	0.1237	0.4161	0.4419	0.419	0.419	0.3369	0.8472	0.8977	0.0029	0.4117
Stegastes diencaeus	0.9042	0.7087	0.5804	0.6362	0.5914	0.305	0.5866	0.6754	0.6229	0.8667	0.8875	0.6443	0.5659	0.7389	0.7388	0.8488	0.709	0.3997	0.5376	0.5733	0.8127	0.635	0.8547	0.8877	0.5049	0.1582	0.9935	0.9861	0.8947	0.6401	0.6585	0.3635	0.8371	0.088	0.8895	0.5902	0.595	0.0294	0.5371	0.9115	0.4157	0.6743	0.3063	0.3063	0.922	0.4428	0.4619	0.7681	0.5586
Stegastes partitus	0.2724	0.0008	0.6224	0.4056	0.4756	0.1139	0.054	0.0483	0.0133	0.0031	0.9021	0.4559	0.2491	0.0304	0.0305	0.5913	0.4454	0.2659	0.0524	0.5238	0.0903	0.7786	0.8234	0.5731	0.1461	0.8631	0.3101	0.3081	0.1041	0.5266	0.9498	0.5654	0.9796	0.9756	0.1995	0.0762	0.1762	0.755	0.5416	0.4472	0.147	0.6105	0.2962	0.2962	0.0973	0.4599	0.4929	0.9847	0.6801
Stegastes planifrons	0.8105	0.4251	0.1908	0.186	0.9563	0.672	0.7794	0.39	0.2436	0.3487	0.6218	0.9207	0.4765	0.3534	0.3534	0.8315	0.5558	0.9	0.0815	0.1878	0.18	0.2891	0.3784	0.3829	0.9115	0.5766	0.8844	0.8884	0.2141	0.0191	0.9663	0.6796	0.145	0.4128	0.9131	0.7123	0.9021	0.6953	0.6247	0.8414	0.5008	0.9361	0.3769	0.3769	0.712	0.999	0.457	0.2355	0.6639
Stegastes variabilis	0.3293	0.0001	0.5804	0.7754	0.5914	0.4233	0.0149	0.0036	0.0153	0.0314	0.9387	0.6443	0.5659	0.0752	0.0752	0.9022	0.709	0.7035	0.2146	0.5733	0.0843	0.6834	0.4785	0.9056	0.4732	0.8679	0.6697	0.6694	0.2505	0.5527	0.9418	0.8561	0.7783	0.8082	0.7127	0.3574	0.5211	0.9039	1	0.9115	0.5651	0.7266	0.862	0.862	0.4202	0.9771	0.9428	0.7681	0.4212
Synodus intermedius	0.3651	0.6936	0.2698	0.7627	0.4552	0.2725	0.3464	0.8053	0.6704	0.2076	0.3496	0.3845	0.2502	0.6905	0.6907	0.5488	0.4804	0.7101	0.6739	0.662	0.3837	0.4043	0.6838	0.9278	0.1696	0.9108	0.8255	0.8279	0.731	0.4013	0.4676	0.875	0.1477	0.4953	0.0257	0.0228	0.0221	0.7028	0.1318	0.1001	0.0936	0.2421	0.1311	0.1311	0.0013	0.4606	0.027	0.1134	0.5429
Thalassoma bifasciatum	0.6226	0.5125	0.3638	0.3792	0.2959	0.1135	0.4162	0.6465	0.9118	0.9436	0.5449	0.6155	0.0116	0.8847	0.8846	0.9494	0.9889	0.9273	0.6227	0.0477	0.4314	0.0672	0.0645	0.6542	0.9004	0.7107	0.5641	0.563	0.284	0.8769	0.7393	0.2524	0.7175	0.2595	0.8937	0.2994	0.6737	0.8357	0.8963	0.5473	0.2378	0.2309	0.3274	0.3274	0.5668	0.7095	0.9023	0.5312	0.234
Abudefduf saxatilis 2	0.4983	0.3617	0.7912	0.3482	0.0858	0.0021	0.7728	0.5835	0.2309	0.2184	0.7239	0.0953	0.2076	0.5063	0.5066	0.3252	0.1923	0.256	0.2542	0.5391	0.3668	0.7773	0.7953	0.1825	0.0121	0.2188	0.6195	0.6116	0.161	0.5175	0.2416	0.0198	0.5264	0.07	0.1322	0.0433	0.0578	0.0077	0.732	0.1714	0.0209	0.3259	0.0273	0.0273	0.2792	0.0486	0.6088	0.804	0.3011
Acanthurus bahianus 2	0.8157	0.6094	0.2938	0.9122	0.8994	0.6294	0.8256	0.6628	0.5475	0.0355	0.6482	0.5857	0.5708	0.3443	0.3444	0.8945	0.4097	0.0389	0.2942	0.2926	0.1296	0.1	0.9413	0.8631	0.1635	0.1672	0.7249	0.7179	0.904	0.674	0.7744	0.8489	0.8644	0.7699	0.0881	0.2105	0.1353	0.3459	0.6978	0.9386	0.4281	0.9439	0.384	0.384	0.143	0.1398	0.0939	0.3999	0.5933
Acanthurus chirurgus 2	0.8847	0.6447	0.4932	0.5944	0.6852	0.3367	0.5005	0.6049	0.5599	0.9387	0.9415	0.6862	0.5542	0.773	0.7729	0.8843	0.6846	0.2802	0.545	0.6752	0.8356	0.7783	0.7814	0.831	0.4764	0.1207	0.9367	0.9288	0.8092	0.5263	0.7086	0.3983	0.8475	0.1031	0.7739	0.5505	0.5393	0.028	0.5875	0.9337	0.3995	0.6779	0.2737	0.2737	0.9692	0.3745	0.5859	0.7162	0.5367
Acanthurus coeruleus 2	0.3035	0.4487	0.0436	0.5103	0.3144	0.2663	0.6347	0.1996	0.2736	0.0572	0.4055	0.1934	0.6939	0.4835	0.4838	0.7182	0.2466	0.2781	0.7124	0.3952	0.0256	0.2078	0.2698	0.753	0.0289	0.124	0.5824	0.5897	0.8404	0.6306	0.2844	0.8127	0.6355	0.2145	0.1075	0.0819	0.0247	0.0421	0.8719	0.5161	0.2117	0.7162	0.2274	0.2274	0.1513	0.121	0.3739	0.944	0.5538
Anisotremus virginicus 2	0.5637	0.9136	0.0409	0.0161	0.6371	0.9948	0.3692	0.7282	0.6634	0.9735	0.4151	0.6867	0.8568	0.9571	0.957	0.9241	0.9295	0.8888	0.1196	0.5959	0.9017	0.6481	0.8364	0.0914	0.8399	0.8562	0.836	0.834	0.132	0.0469	0.589	0.2049	0.0489	0.8789	0.9721	0.717	0.8306	0.9733	0.8221	0.9754	0.7656	0.2537	0.7739	0.7739	0.5677	0.6056	0.4497	0.506	0.1882
Apogon townsendi 2	0.0923	0.4967	0.7895	0.7933	0.5036	0.6274	0.5076	0.4444	0.3761	0.9579	0.3903	0.42	0.2859	0.1116	0.1116	0.0591	0.502	0.5539	0.8227	0.5839	0.7667	0.3896	0.3908	0.1684	0.7833	0.4133	0.2877	0.2851	0.3277	0.1042	0.2666	0.3307	0.1064	0.4686	0.7803	0.7848	0.7459	0.7207	0.5269	0.5046	0.7934	0.7034	0.847	0.847	0.6122	0.7001	0.2778	0.8803	0.5431
Canthigaster rostrata 2	0.487	0.4801	0.9473	0.7124	0.0125	0.2937	0.8931	0.4956	0.5154	0.4398	0.6361	0.0418	0.2087	0.5565	0.5562	0.4296	0.3017	0.812	0.5814	0.9188	0.3913	0.9438	0.6663	0.7003	0.3503	0.6123	0.2969	0.3001	0.5656	0.9062	0.0333	0.5793	0.7692	0.0201	0.8596	0.3766	0.3543	0.1196	0.2358	0.7984	0.609	0.939	0.697	0.697	0.9418	0.7153	0.9869	0.5847	0.8135
Carangoides ruber 2	0.9107	0.502	0.4883	0.5849	0.9255	0.3847	0.4038	0.4075	0.411	0.9616	0.9794	0.8789	0.5551	0.8619	0.8619	0.8004	0.7908	0.1513	0.5593	0.8058	0.7612	0.9375	0.5602	0.8831	0.4883	0.0772	0.7695	0.7611	0.719	0.4415	0.8976	0.3814	0.7997	0.1687	0.6183	0.5144	0.4976	0.0438	0.833	0.8576	0.3623	0.7923	0.219	0.219	0.8018	0.3177	0.814	0.7301	0.5579
Cephalopholis cruentata 2	0.1725	0.8199	0.2454	0.6457	0.214	0.493	0.8341	0.9785	0.9357	0.5083	0.61	0.3955	0.9833	0.0958	0.0958	0.2003	0.9835	0.0086	0.9686	0.668	0.9151	0.84	0.6694	0.6617	0.4717	0.2997	0.0601	0.0588	0.9801	0.6498	0.1457	0.6572	0.6731	0.5952	0.283	0.45	0.5467	0.6104	0.2738	0.4183	0.2483	0.9694	0.1846	0.1846	0.2738	0.2726	0.9035	0.8786	0.8608
Chaetodon capistratus 2	0.0674	0.196	0.9665	0.6876	0.5556	0.4782	0.1019	0.4492	0.3073	0.1129	0.6487	0.4827	0.886	0.0071	0.0071	0.105	0.4519	0.2598	0.2223	0.828	0.2871	0.8225	0.7784	0.3183	0.4866	0.4096	0.2628	0.259	0.387	0.361	0.3004	0.5062	0.6552	0.3847	0.2878	0.307	0.3858	0.8007	0.0186	0.2127	0.3392	0.6048	0.4781	0.4781	0.1475	0.7312	0.3105	0.8345	0.4923
Chaetodon ocellatus 2	0.7425	0.3677	0.9019	0.401	0.0485	0.3382	0.8838	0.3086	0.2156	0.8051	0.8878	0.0634	0.5853	0.6911	0.6908	0.6963	0.1519	0.5592	0.5579	0.3776	0.6516	0.4539	0.2856	0.7251	0.4569	0.623	0.71	0.7082	0.2745	0.5183	0.1245	0.5701	0.8602	0.2471	0.8938	0.7518	0.8056	0.3686	0.1996	0.942	0.7323	0.8508	0.8391	0.8391	0.6798	0.6644	0.5293	0.9562	0.4171
Chaetodon striatus 2	0.5274	0.1269	0.3156	0.9641	0.575	0.6802	0.3302	0.0997	0.1271	0.0026	0.8981	0.4365	0.6126	0.2241	0.2243	0.8551	0.5057	0.4011	0.1847	0.2928	0.0088	0.1411	0.5109	0.6883	0.2146	0.5298	0.8308	0.8351	0.7577	0.9724	0.6033	0.7598	0.6693	0.9344	0.1882	0.1928	0.1364	0.7439	0.7037	0.9028	0.5719	0.9006	0.7229	0.7229	0.127	0.5003	0.1311	0.6009	0.8348
Coryphopterus glaucofraenum 2	0.4489	0.1356	0.5156	0.5949	0.1436	0.0027	0.3282	0.3903	0.2105	0.0641	0.863	0.1703	0.0669	0.3072	0.3074	0.4767	0.2788	0.1837	0.2609	0.4378	0.2723	0.7129	0.8934	0.5287	0.0285	0.2999	0.5546	0.5475	0.2432	0.8615	0.4173	0.1364	0.9803	0.1158	0.1082	0.0084	0.032	0.0591	0.6837	0.2371	0.012	0.4813	0.0283	0.0283	0.0922	0.169	0.5598	0.8137	0.9321
Coryphopterus personatus 2	0.3343	0.5535	0.8247	0.4546	0.1718	0.0065	0.3827	0.9886	0.467	0.3934	0.3497	0.1994	0.0894	0.6471	0.6473	0.1752	0.3178	0.6748	0.3822	0.4646	0.7672	0.7128	0.5394	0.1378	0.063	0.9716	0.605	0.6022	0.4222	0.9358	0.3676	0.1015	0.6473	0.2431	0.0283	0.0065	0.0281	0.3579	0.1089	0.0035	0.0021	0.0115	0.0078	0.0078	0.0146	0.2263	0.1474	0.0314	0.9699
Elacatinus xanthiprora 2	0.5391	0.5689	0.3943	0.4685	0.4087	0.0946	0.9119	0.5222	0.5918	0.6527	0.1477	0.4795	0.3756	0.612	0.6119	0.3035	0.5842	0.8524	0.3398	0.3851	0.5795	0.4668	0.6215	0.7392	0.3295	0.6127	0.9049	0.9088	0.6128	0.3791	0.5003	0.318	0.4274	0.0614	0.4025	0.1937	0.2369	0.1002	0.6434	0.1104	0.0729	0.5275	0.0495	0.0495	0.3784	0.4484	0.9135	0.0741	0.9334
Equetus punctatus 2	0.7823	0.7087	0.5804	0.9267	0.8833	0.9805	0.5866	0.6754	0.7772	0.2915	0.7168	0.6798	0.5659	0.9956	0.9956	0.6958	0.709	0.3775	0.6008	0.1052	0.4316	0.0303	0.64	0.6928	0.4654	0.3654	0.7144	0.7196	0.5904	0.4406	0.5754	0.9388	0.7027	0.6854	0.1648	0.3574	0.2163	0.6701	0.5371	0.9115	0.6943	0.6683	0.6126	0.6126	0.1861	0.4428	0.0186	0.7681	0.9183
Haemulon flavolineatum 2	0.4541	0.6922	0.5142	0.7159	0.9993	0.4253	0.8928	0.6191	0.3869	0.9748	0.5733	0.697	0.8055	0.578	0.5781	0.4639	0.2239	0.5003	0.916	0.2122	0.9064	0.3216	0.4522	0.331	0.4481	0.6737	0.2192	0.2214	0.5242	0.8679	0.8434	0.5994	0.5381	0.8557	0.667	0.8415	0.9528	0.613	0.8912	0.5544	0.4543	0.7375	0.407	0.407	0.944	0.248	0.5203	0.5797	0.2049
Haemulon macrostomum 2	0.9042	0.7087	0.5804	0.6362	0.5914	0.305	0.5866	0.6754	0.6229	0.8667	0.8875	0.6443	0.5659	0.7389	0.7388	0.8488	0.709	0.3997	0.5376	0.5733	0.8127	0.635	0.8547	0.8877	0.5049	0.1582	0.9935	0.9861	0.8947	0.6401	0.6585	0.3635	0.8371	0.088	0.8895	0.5902	0.595	0.0294	0.5371	0.9115	0.4157	0.6743	0.3063	0.3063	0.922	0.4428	0.4619	0.7681	0.5586
Haemulon plumierii 2	0.2856	0.8716	0.4355	0.8056	0.3492	0.1312	0.5135	0.8032	0.9159	0.8091	0.0801	0.3414	0.3494	0.9254	0.9252	0.2151	0.4538	0.9255	0.917	0.8639	0.9314	0.9377	0.697	0.4578	0.1853	0.8938	0.8528	0.8537	0.7379	0.5173	0.3864	0.471	0.2238	0.3032	0.067	0.0529	0.0601	0.5054	0.11	0.007	0.0421	0.09	0.0512	0.0512	0.031	0.4031	0.1747	0.0007	0.8547
Haemulon sciurus 2	0.817	0.5916	0.5826	0.9959	0.6906	0.985	0.4831	0.6891	0.8602	0.354	0.9184	0.4711	0.6803	0.8209	0.8208	0.7488	0.5308	0.5601	0.5937	0.0557	0.3853	0.0094	0.88	0.8451	0.3654	0.454	0.5268	0.5308	0.5626	0.4961	0.3492	0.9845	0.694	0.6072	0.1242	0.3576	0.1739	0.6084	0.5131	0.7676	0.6921	0.5174	0.6044	0.6044	0.192	0.3383	0.0051	0.9745	0.6623
Halichoeres bivittatus 2	0.803	0.8544	0.4501	0.5207	0.782	0.246	0.8829	0.707	0.6359	0.7807	0.8048	0.8499	0.4468	0.8852	0.8852	0.6353	0.9267	0.1941	0.6507	0.7417	0.9793	0.8377	0.6095	0.8606	0.4077	0.0604	0.8479	0.8383	0.8301	0.5535	0.8907	0.3659	0.9774	0.1396	0.5872	0.3367	0.3551	0.0437	0.9896	0.6875	0.2539	0.7335	0.1859	0.1859	0.6259	0.4238	0.7957	0.8353	0.8831
Holacanthus ciliaris 2	0.444	0.6051	0.6386	0.5145	0.2471	0.5318	0.8298	0.2341	0.0934	0.1617	0.5518	0.1264	0.6863	0.5908	0.5911	0.6178	0.2088	0.6617	0.2087	0.1439	0.0219	0.0789	0.036	0.3715	0.0457	0.2946	0.5768	0.5819	0.5298	0.3636	0.1498	0.4528	0.4386	0.57	0.2002	0.4224	0.1687	0.1558	0.7788	0.5251	0.5885	0.7437	0.6104	0.6104	0.5771	0.0597	0.1992	0.7732	0.041
Hypoplectrus nigricans 2	0.3039	0.164	0.5571	0.7818	0.3267	0.0437	0.0841	0.4103	0.2651	0.4702	0.4269	0.3755	0.1634	0.4888	0.489	0.3875	0.3646	0.9149	0.6532	0.0704	0.8564	0.1556	0.7915	0.5116	0.2954	0.4408	0.4718	0.4737	0.4326	0.9211	0.7593	0.5327	0.3874	0.5558	0.3165	0.088	0.264	0.7842	0.5298	0.1172	0.0517	0.2744	0.1177	0.1177	0.1308	0.6971	0.9289	0.0725	0.5071
Hypoplectrus puella 2	0.1692	0.5623	0.1645	0.3811	0.6313	0.0641	0.1975	0.7383	0.8158	0.4412	0.2028	0.708	0.2661	0.4731	0.4732	0.2352	0.7772	0.3914	0.7527	0.4667	0.7035	0.6117	0.6429	0.9796	0.2131	0.4271	0.7705	0.7649	0.8262	0.4324	0.9289	0.5346	0.309	0.2606	0.2087	0.0424	0.0893	0.2255	0.3551	0.1122	0.0294	0.8041	0.0423	0.0423	0.0713	0.5194	0.8404	0.207	0.4803
Lucayablennius zingaro 2	0.3293	0.0001	0.5804	0.7754	0.5914	0.4233	0.0149	0.0036	0.0153	0.0314	0.9387	0.6443	0.5659	0.0752	0.0752	0.9022	0.709	0.7035	0.2146	0.5733	0.0843	0.6834	0.4785	0.9056	0.4732	0.8679	0.6697	0.6694	0.2505	0.5527	0.9418	0.8561	0.7783	0.8082	0.7127	0.3574	0.5211	0.9039	1	0.9115	0.5651	0.7266	0.862	0.862	0.4202	0.9771	0.9428	0.7681	0.4212
Lutjanus griseus 2	0.8368	0.8635	0.1186	0.0088	0.5618	0.6505	0.4507	0.9466	0.4006	0.8766	0.5929	0.5367	0.8956	0.8165	0.8166	0.6715	0.6071	0.8848	0.0971	0.9643	0.8567	0.9489	0.6543	0.0257	0.5567	0.9108	0.5349	0.5337	0.0574	0.0386	0.6078	0.1107	0.0278	0.9245	0.7845	0.909	0.9663	0.7508	0.8192	0.7325	0.9062	0.197	0.8986	0.8986	0.6869	0.3379	0.5939	0.6852	0.0806
Malacoctenus triangulatus 2	0.7639	0.5689	0.3943	0.6694	0.6047	0.4598	0.4024	0.5222	0.5552	0.5198	0.8682	0.5037	0.3756	0.7983	0.7982	0.881	0.5694	0.1706	0.9463	0.4927	0.6875	0.3006	0.6215	0.6846	0.2761	0.0552	0.7874	0.7969	0.6118	0.339	0.442	0.5391	0.8953	0.1065	0.2577	0.2563	0.1669	0.0491	1	0.8665	0.3537	0.9951	0.2344	0.2344	0.3784	0.228	0.3678	0.654	0.6036
Microspathodon chrysurus 2	0.7087	0.4228	0.9862	0.4586	0.0059	0.0223	0.4683	0.6257	0.3388	0.1762	0.6727	0.0319	0.0852	0.9223	0.9226	0.5878	0.3423	0.9113	0.2446	0.9024	0.2372	0.7039	0.9895	0.4422	0.0397	0.4012	0.552	0.5592	0.3821	0.6638	0.035	0.1159	0.7493	0.0203	0.1184	0.0148	0.0128	0.0808	0.5343	0.1467	0.0579	0.1972	0.1073	0.1073	0.1262	0.2961	0.1612	0.5084	0.8917
Pomacanthus arcuatus 2	0.6945	0.6835	0.7891	0.2936	0.3892	0.619	0.4719	0.9042	0.5325	0.7162	0.517	0.2585	0.8133	0.9241	0.9239	0.4594	0.3497	0.9963	0.3288	0.2454	0.4706	0.1737	0.4334	0.1069	0.185	0.726	0.7561	0.7585	0.6468	0.4385	0.2148	0.2817	0.4802	0.7089	0.1797	0.5397	0.2997	0.4698	0.3362	0.2337	0.5511	0.1239	0.5067	0.5067	0.5279	0.1225	0.0629	0.53	0.0717
Pseudupeneus maculatus 2	0.6712	0.6387	0.7478	0.8121	0.4758	0.2834	0.9921	0.4344	0.8455	0.6613	0.4342	0.4076	0.2748	0.8639	0.8637	0.4448	0.503	0.7899	0.7058	0.6822	0.9391	0.4491	0.3867	0.4313	0.2314	0.9195	0.9586	0.9611	0.8191	0.5541	0.3948	0.4271	0.4411	0.4171	0.0297	0.0755	0.0654	0.6353	0.0773	0.0503	0.1022	0.0276	0.0918	0.0918	0.0222	0.3225	0.0093	0.0602	0.9962
Scarus iseri 2	0.5447	0.8693	0.1914	0.6667	0.4038	0.054	0.9223	0.9795	0.9242	0.3344	0.5748	0.3539	0.211	0.7202	0.7204	0.5055	0.3805	0.1165	0.9807	0.8311	0.5689	0.8761	0.7428	0.9257	0.0664	0.0955	0.8335	0.8241	0.9468	0.4412	0.4961	0.2771	0.7501	0.0603	0.1068	0.0378	0.0394	0.0108	0.6963	0.2883	0.0334	0.773	0.0204	0.0204	0.1271	0.1196	0.5672	0.7286	0.7361
Scomberomorus regalis 2	0.7822	0.8622	0.4988	0.202	0.2818	0.0358	0.8718	0.4087	0.9301	0.8294	0.6239	0.3599	0.2468	0.9007	0.9005	0.2047	0.4768	0.7929	0.5674	0.2567	0.5176	0.3456	0.4459	0.0264	0.2605	0.9207	0.4413	0.4391	0.2771	0.5697	0.475	0.0104	0.5991	0.2455	0.2867	0.2268	0.3445	0.2883	0.3414	0.0494	0.0596	0.0127	0.0519	0.0519	0.4363	0.2569	0.5857	0.1448	0.4863
Serranus tigrinus 2	0.4395	0.8388	0.5077	0.5918	0.7615	0.3656	0.8973	0.9374	0.4821	0.6743	0.4471	0.4529	0.661	0.704	0.7041	0.446	0.1587	0.6858	0.5849	0.6411	0.9455	0.9581	0.9935	0.2732	0.2703	0.3734	0.3986	0.4023	0.7666	0.7586	0.7843	0.6914	0.751	0.8856	0.0953	0.2734	0.3305	0.9773	0.2968	0.1315	0.1885	0.0785	0.1861	0.1861	0.1221	0.228	0.2362	0.0741	0.5736
Serranus tortugarum 2	0.2315	0.0201	0.2591	0.8571	0.6628	0.1685	0.0558	0.0577	0.1071	0.1132	0.7491	0.6709	0.4347	0.111	0.111	0.6165	0.5724	0.3616	0.5842	0.2494	0.2743	0.371	0.6968	0.9238	0.3187	0.8322	0.4462	0.4446	0.4368	0.9784	0.8408	0.8742	0.7103	0.7985	0.558	0.2099	0.3809	0.5695	1	0.6414	0.2269	0.7029	0.3607	0.3607	0.3272	0.6974	0.6452	0.9428	0.5623
Sparisoma aurofrenatum 2	0.6006	0.9172	0.1314	0.406	0.1055	0.6185	0.5559	0.8282	0.9827	0.7863	0.9993	0.3856	0.3665	0.3626	0.3625	0.9396	0.7937	0.0675	0.6486	0.9446	0.8789	0.7916	0.6675	0.6407	0.9292	0.5869	0.2596	0.2597	0.5731	0.4283	0.1805	0.5107	0.6503	0.3157	0.8216	0.7336	0.7922	0.8948	0.8272	0.5978	0.895	0.2732	0.913	0.913	0.9878	0.4436	0.6504	0.4507	0.4731
Sparisoma viride 2	0.3932	0.2337	0.023	0.3449	0.7191	0.3812	0.3609	0.1639	0.3589	0.089	0.7191	0.548	0.5463	0.3246	0.3248	0.9818	0.3987	0.2007	0.9341	0.9435	0.1541	0.7775	0.6012	0.3806	0.2212	0.4083	0.926	0.9216	0.8268	0.3678	0.8593	0.7513	0.43	0.5256	0.3291	0.1776	0.1858	0.2787	0.8417	0.8872	0.31	0.4152	0.3522	0.3522	0.2175	0.4356	0.9237	0.8243	0.824
Stegastes adustus 2	0.3109	0.7104	0.5105	0.2439	0.3261	0.813	0.3649	0.7401	0.5623	0.5126	0.1684	0.3302	0.7872	0.8904	0.8903	0.4088	0.5255	0.6367	0.2627	0.6912	0.4529	0.6222	0.5414	0.8605	0.5909	0.3255	0.8303	0.836	0.2673	0.3458	0.3142	0.4408	0.172	0.407	0.8826	0.934	0.9296	0.2489	0.2215	0.3413	0.7948	0.8025	0.8279	0.8279	0.4641	0.4899	0.9973	0.0351	0.1965
Stegastes diencaeus 2	0.9042	0.7087	0.5804	0.6362	0.5914	0.305	0.5866	0.6754	0.6229	0.8667	0.8875	0.6443	0.5659	0.7389	0.7388	0.8488	0.709	0.3997	0.5376	0.5733	0.8127	0.635	0.8547	0.8877	0.5049	0.1582	0.9935	0.9861	0.8947	0.6401	0.6585	0.3635	0.8371	0.088	0.8895	0.5902	0.595	0.0294	0.5371	0.9115	0.4157	0.6743	0.3063	0.3063	0.922	0.4428	0.4619	0.7681	0.5586
Stegastes partitus 2	0.1214	0.0307	0.5714	0.3957	0.5534	0.0394	0.114	0.1894	0.0436	0.0071	0.7487	0.4901	0.2512	0.0202	0.0202	0.2258	0.4368	0.1254	0.0622	0.6314	0.1337	0.9306	0.9972	0.2574	0.0471	0.5946	0.2019	0.1991	0.14	0.5629	0.9801	0.272	0.8615	0.8897	0.0384	0.0178	0.0565	0.5292	0.1652	0.1194	0.0275	0.2896	0.0743	0.0743	0.0163	0.192	0.2275	0.6403	0.9151
Stegastes planifrons 2	0.7968	0.4358	0.1276	0.1226	0.8557	0.8152	0.7957	0.44	0.2358	0.4071	0.6598	0.9842	0.5246	0.3739	0.374	0.7164	0.576	0.8722	0.0696	0.2676	0.2283	0.3955	0.4024	0.2498	0.8555	0.5678	0.942	0.9463	0.1441	0.0061	0.9092	0.493	0.0992	0.4948	0.9171	0.7475	0.916	0.7889	0.5925	0.9644	0.5902	0.7978	0.4572	0.4572	0.6809	0.9401	0.498	0.2912	0.5873
Synodus intermedius 2	0.3118	0.4817	0.2534	0.8026	0.4273	0.2401	0.2278	0.5968	0.4959	0.1295	0.3777	0.3673	0.2338	0.5466	0.5467	0.5538	0.4652	0.6821	0.5698	0.7333	0.2846	0.461	0.7693	0.9438	0.152	0.9326	0.8786	0.881	0.8581	0.4743	0.4936	0.8999	0.1535	0.5369	0.0289	0.0174	0.0207	0.7272	0.1522	0.1139	0.0886	0.2894	0.1426	0.1426	0.0009	0.4827	0.04	0.1478	0.4859
Thalassoma bifasciatum 2	0.6627	0.5357	0.4357	0.2587	0.1478	0.0371	0.6097	0.6906	0.9083	0.9008	0.6364	0.336	0.0113	0.8418	0.8417	0.8469	0.6127	0.9425	0.5244	0.0397	0.5132	0.0774	0.1655	0.4286	0.5732	0.8198	0.5323	0.5307	0.191	0.7877	0.4843	0.11	0.9224	0.1299	0.6955	0.2146	0.508	0.4787	0.9808	0.4226	0.1307	0.1491	0.1779	0.1779	0.5505	0.875	0.9456	0.498	0.6151
[truncated: 121 more columns]

## Sheet: Corr Prob Env Fish species
Correlation Probability
Fish with abundance >3	Hard coral reef	Hard coral bleached	Recently killed coral	Anemone	Soft coral reef	Sponges	Worms	Zoanthid	Rubble	Sand reef	Rock	Calcifying algae reef	Macroalgae reef	Soft Substrate	Hard substrate	Thalassia	Syringodium	Sand seagrass	Hard coral seagrass	Soft coral seagrass	Sponge seagrass	Macroalgae seagrass	Calcifying algae seagrass	Seagrass Biomass (g/m2)	Distance Reef-Mangrove (m)	Temp °C reef	Sal psu reef	TDS mg/L reef	ODO mg/L reef	pH reef	Turbidity FNU reef	Chlorophyll µg/L reef	BGA-PE µg/L reef	fDOM RFU reef	Reef Biodiversity M1	Reef Biodiversity M2	Mangrove M1	Mangrove M2	Seagrass M1	Seagrass M2	Trophic level (Fish Base)	Trophic level Avg all species	Vulnerability (Fish Base)	Vulnerability (Fish Base)/10	Resilience high (No of species, Fish Base)	Resilience medium	Resilience low	Resilience very low	Resilience high %
Abudefduf saxatilis 2	0.4983	0.3617	0.7912	0.3482	0.0858	0.0021	0.7728	0.5835	0.2309	0.2184	0.7239	0.0953	0.2076	0.5063	0.5066	0.3252	0.1923	0.256	0.2542	0.5391	0.3668	0.7773	0.7953	0.1825	0.0121	0.2188	0.6195	0.6116	0.161	0.5175	0.2416	0.0198	0.5264	0.07	0.1322	0.0433	0.0578	0.0077	0.732	0.1714	0.0209	0.3259	0.0273	0.0273	0.2792	0.0486	0.6088	0.804	0.3011
Acanthurus bahianus 2	0.8157	0.6094	0.2938	0.9122	0.8994	0.6294	0.8256	0.6628	0.5475	0.0355	0.6482	0.5857	0.5708	0.3443	0.3444	0.8945	0.4097	0.0389	0.2942	0.2926	0.1296	0.1	0.9413	0.8631	0.1635	0.1672	0.7249	0.7179	0.904	0.674	0.7744	0.8489	0.8644	0.7699	0.0881	0.2105	0.1353	0.3459	0.6978	0.9386	0.4281	0.9439	0.384	0.384	0.143	0.1398	0.0939	0.3999	0.5933
Acanthurus chirurgus 2	0.8847	0.6447	0.4932	0.5944	0.6852	0.3367	0.5005	0.6049	0.5599	0.9387	0.9415	0.6862	0.5542	0.773	0.7729	0.8843	0.6846	0.2802	0.545	0.6752	0.8356	0.7783	0.7814	0.831	0.4764	0.1207	0.9367	0.9288	0.8092	0.5263	0.7086	0.3983	0.8475	0.1031	0.7739	0.5505	0.5393	0.028	0.5875	0.9337	0.3995	0.6779	0.2737	0.2737	0.9692	0.3745	0.5859	0.7162	0.5367
Hard coral reef	<.0001	0.3977	0.3576	0.6196	0.7318	0.3847	0.1212	0.2305	0.2308	0.3455	0.0223	0.7434	0.4974	0.0437	0.0437	0.0063	0.7648	0.4935	0.8363	0.7835	0.2114	0.8396	0.3475	0.3204	0.2454	0.3403	0.6544	0.6494	0.8636	0.5343	0.5512	0.5779	0.8675	0.6704	0.3028	0.3486	0.2932	0.6204	0.052	0.0578	0.2601	0.9898	0.343	0.343	0.2606	0.4296	0.7437	0.3381	0.9377
Hard coral bleached	0.3977	<.0001	0.922	0.3609	0.494	0.301	0.0332	0.0099	0.0047	0.0242	0.7424	0.5572	0.4639	0.0551	0.0552	0.8199	0.6359	0.6244	0.0649	0.4726	0.1035	0.592	0.5576	0.7008	0.3953	0.8631	0.4602	0.4596	0.0661	0.288	0.995	0.7902	0.8643	0.8042	0.6404	0.3313	0.522	0.936	0.9143	0.8185	0.4815	0.9398	0.7694	0.7694	0.4378	0.8647	0.9353	0.7087	0.6007
Recently killed coral	0.3576	0.922	<.0001	0.0779	0.9709	0.7784	0.8279	0.4276	0.7479	0.4699	0.2485	0.5841	0.9201	0.8069	0.807	0.9533	0.2552	0.4472	0.433	0.7131	0.3679	0.4594	0.3908	0.2974	0.3086	0.7466	0.7371	0.7371	0.1884	0.0702	0.7782	0.3759	0.188	0.6697	0.2873	0.3676	0.259	0.3949	0.9154	0.7487	0.4749	0.4593	0.4171	0.4171	0.2541	0.3569	0.8049	0.5804	0.8106
Anemone	0.6196	0.3609	0.0779	<.0001	0.4157	0.3531	0.8719	0.9623	0.2949	0.4557	0.189	0.4593	0.3483	0.5861	0.5862	0.9317	0.548	0.6579	0.0076	0.5414	0.8747	0.6719	0.7072	0.0565	0.5442	0.8497	0.2471	0.2464	0.0025	0.0694	0.6796	0.0959	0.1042	0.991	0.6229	0.6619	0.8458	0.9623	0.8086	0.7778	0.5946	0.078	0.6772	0.6772	0.8749	0.49	0.4531	0.6362	0.4741
Soft coral reef	0.7318	0.494	0.9709	0.4157	<.0001	0.0993	0.7717	0.5637	0.336	0.3916	0.9624	0.0006	0.1019	0.5257	0.5253	0.7629	0.0929	0.6248	0.3587	0.8748	0.3913	0.883	0.7162	0.7404	0.1229	0.9728	0.3404	0.3422	0.4448	0.8621	0.001	0.3529	0.5758	0.0126	0.3405	0.1134	0.1074	0.1574	0.7014	0.4982	0.2374	0.2853	0.3219	0.3219	0.4113	0.432	0.393	0.5914	0.6935
Sponges	0.3847	0.301	0.7784	0.3531	0.0993	<.0001	0.4363	0.7117	0.278	0.2073	0.5971	0.1258	0.0576	0.4484	0.4487	0.2216	0.2246	0.3137	0.2503	0.317	0.5404	0.559	0.7314	0.1482	0.0164	0.5	0.454	0.4487	0.1814	0.7173	0.3325	0.0255	0.9327	0.1025	0.0495	0.0036	0.0229	0.0729	0.3591	0.0369	0.0003	0.0937	0.0025	0.0025	0.0587	0.1022	0.385	0.305	0.7362
Worms	0.1212	0.0332	0.8279	0.8719	0.7717	0.4363	<.0001	0.0776	0.1603	0.2592	0.4318	0.9291	0.6861	0.1431	0.1432	0.3779	0.6073	0.7626	0.5979	0.5617	0.3162	0.4851	0.8253	0.9165	0.7608	0.8027	0.9062	0.9057	0.528	0.5457	0.7251	0.9506	0.4689	0.7804	0.8601	0.3868	0.5756	0.6452	0.392	0.3948	0.5034	0.9385	0.8244	0.8244	0.377	0.5276	0.9051	0.4851	0.0953
Zoanthid	0.2305	0.0099	0.4276	0.9623	0.5637	0.7117	0.0776	<.0001	0.0037	0.0606	0.706	0.525	0.7942	0.1356	0.1356	0.8704	0.5953	0.9437	0.3163	0.8751	0.0145	0.8217	0.0509	0.902	0.4016	0.9986	0.8757	0.8758	0.4287	0.4402	0.809	0.6884	0.9329	0.7512	0.8021	0.6122	0.581	0.932	0.8486	1	0.8807	0.4587	0.8471	0.8471	0.7017	0.8387	0.9191	0.6754	0.9496
Rubble	0.2308	0.0047	0.7479	0.2949	0.336	0.278	0.1603	0.0037	<.0001	0.0176	0.8556	0.2772	0.8306	0.0729	0.073	0.5808	0.314	0.6084	0.0388	0.9448	0.0177	0.8789	0.1338	0.3813	0.123	0.9159	0.6606	0.6591	0.0792	0.1841	0.6182	0.6005	0.6053	0.9069	0.3526	0.2943	0.3095	0.6829	0.7793	0.5571	0.4205	0.7735	0.641	0.641	0.4058	0.3482	0.5986	0.8304	0.63
Sand reef	0.3455	0.0242	0.4699	0.4557	0.3916	0.2073	0.2592	0.0606	0.0176	<.0001	0.8864	0.2862	0.3964	0.0637	0.0638	0.7353	0.311	0.1732	0.0312	0.7213	0.0075	0.4316	0.5259	0.6666	0.0503	0.4336	0.6272	0.6218	0.2181	0.587	0.602	0.5901	0.8521	0.8044	0.0824	0.066	0.0673	0.4474	0.5597	0.5455	0.2096	0.6997	0.3284	0.3284	0.0782	0.2013	0.1629	0.6703	0.8477
Rock	0.0223	0.7424	0.2485	0.189	0.9624	0.5971	0.4318	0.706	0.8556	0.8864	<.0001	0.9836	0.4245	0.7605	0.7605	0.0512	0.8696	0.7682	0.3557	0.5939	0.6048	0.7036	0.356	0.6692	0.4152	0.5506	0.5064	0.509	0.3536	0.8474	0.8842	0.8448	0.5106	0.7554	0.4792	0.5172	0.3434	0.4763	0.1768	0.0619	0.4078	0.9817	0.4234	0.4234	0.4556	0.6208	0.8535	0.0622	0.8785
Calcifying algae reef	0.7434	0.5572	0.5841	0.4593	0.0006	0.1258	0.9291	0.525	0.2772	0.2862	0.9836	<.0001	0.1471	0.5757	0.5753	0.6608	0.0076	0.9506	0.3393	0.9974	0.3029	0.6294	0.5436	0.7954	0.0523	0.953	0.464	0.4652	0.5535	0.8662	0.0008	0.4725	0.5986	0.0282	0.1678	0.0933	0.0685	0.1168	0.6258	0.5535	0.2084	0.2917	0.2426	0.2426	0.2952	0.1763	0.2625	0.6443	0.371
Macroalgae reef	0.4974	0.4639	0.9201	0.3483	0.1019	0.0576	0.6861	0.7942	0.8306	0.3964	0.4245	0.1471	<.0001	0.8367	0.8365	0.6961	0.2572	0.6571	0.3528	0.2093	0.8893	0.4657	0.1299	0.8415	0.3522	0.7662	0.6564	0.655	0.3754	0.6439	0.2855	0.3432	0.4764	0.1061	0.2607	0.0522	0.1885	0.5098	0.9868	0.5377	0.0867	0.1149	0.1191	0.1191	0.139	0.6475	0.3893	0.5659	0.5353
Soft Substrate	0.0437	0.0551	0.8069	0.5861	0.5257	0.4484	0.1431	0.1356	0.0729	0.0637	0.7605	0.5757	0.8367	<.0001	<.0001	0.1339	0.7808	0.1101	0.1592	0.8947	0.1628	0.9418	0.6533	0.2867	0.3709	0.3977	0.1074	0.1055	0.1853	0.2245	0.2386	0.5194	0.3079	0.2825	0.4041	0.4579	0.5535	0.9863	0.1819	0.4201	0.4108	0.9796	0.5473	0.5473	0.3545	0.4744	0.7487	0.7389	0.9779
Hard substrate	0.0437	0.0552	0.807	0.5862	0.5253	0.4487	0.1432	0.1356	0.073	0.0638	0.7605	0.5753	0.8365	<.0001	<.0001	0.1339	0.7804	0.1101	0.1593	0.8947	0.163	0.9417	0.6534	0.2868	0.3712	0.3977	0.1074	0.1054	0.1854	0.2245	0.2383	0.5195	0.3078	0.2823	0.4044	0.4582	0.5538	0.9866	0.1819	0.4202	0.411	0.9798	0.5475	0.5475	0.3547	0.4747	0.7489	0.7388	0.9777
Thalassia	0.0063	0.8199	0.9533	0.9317	0.7629	0.2216	0.3779	0.8704	0.5808	0.7353	0.0512	0.6608	0.6961	0.1339	0.1339	<.0001	0.5856	0.461	0.7918	0.9811	0.6798	0.8737	0.8576	0.0464	0.2855	0.2333	0.4253	0.4196	0.6151	0.3213	0.5536	0.1152	0.4558	0.892	0.3049	0.3663	0.3521	0.4723	0.009	0.0092	0.1551	0.452	0.1769	0.1769	0.352	0.3465	0.6808	0.2386	0.7377
Syringodium	0.7648	0.6359	0.2552	0.548	0.0929	0.2246	0.6073	0.5953	0.314	0.311	0.8696	0.0076	0.2572	0.7808	0.7804	0.5856	<.0001	0.5244	0.4315	0.7632	0.4682	0.732	0.5711	0.8668	0.0688	0.7421	0.9434	0.9451	0.6707	0.509	0.0754	0.7214	0.7187	0.2079	0.1161	0.1646	0.1534	0.2094	0.5277	0.7303	0.2254	0.3676	0.1987	0.1987	0.2687	0.0659	0.3533	0.73	0.1943
Sand seagrass	0.4935	0.6244	0.4472	0.6579	0.6248	0.3137	0.7626	0.9437	0.6084	0.1732	0.7682	0.9506	0.6571	0.1101	0.1101	0.461	0.5244	<.0001	0.3595	0.8851	0.5527	0.7894	0.7658	0.4639	0.1821	0.1502	0.057	0.0551	0.4908	0.9697	0.5312	0.3262	0.2951	0.9409	0.1244	0.2821	0.3209	0.287	0.4881	0.6018	0.1941	0.7346	0.1332	0.1332	0.2435	0.0542	0.4769	0.5629	0.3753
Hard coral seagrass	0.8363	0.0649	0.433	0.0076	0.3587	0.2503	0.5979	0.3163	0.0388	0.0312	0.3557	0.3393	0.3528	0.1592	0.1593	0.7918	0.4315	0.3595	<.0001	0.957	0.1715	0.8094	0.8725	0.1374	0.1945	0.779	0.3277	0.325	0.0048	0.0928	0.6289	0.1911	0.2246	0.9753	0.256	0.2766	0.3504	0.7801	0.5756	0.6338	0.3866	0.1981	0.5307	0.5307	0.3688	0.2976	0.1859	0.5376	0.589
Soft coral seagrass	0.7835	0.4726	0.7131	0.5414	0.8748	0.317	0.5617	0.8751	0.9448	0.7213	0.5939	0.9974	0.2093	0.8947	0.8947	0.9811	0.7632	0.8851	0.957	<.0001	0.2133	0.0003	0.25	0.7173	0.7943	0.2523	0.1428	0.1452	0.3372	0.9512	0.6115	0.6236	0.9185	0.8977	0.7591	0.7882	0.6895	0.7747	0.7005	0.8665	0.4679	0.5477	0.526	0.526	0.9852	0.735	0.2494	0.5733	0.4771
Sponge seagrass	0.2114	0.1035	0.3679	0.8747	0.3913	0.5404	0.3162	0.0145	0.0177	0.0075	0.6048	0.3029	0.8893	0.1628	0.163	0.6798	0.4682	0.5527	0.1715	0.2133	<.0001	0.1372	0.0643	0.8568	0.0864	0.3047	0.6451	0.6509	0.5468	0.4736	0.4226	0.8865	0.8804	0.8312	0.247	0.2681	0.1325	0.384	0.7	0.6599	0.5722	0.7774	0.739	0.739	0.3191	0.2906	0.2867	0.6227	0.585
Macroalgae seagrass	0.8396	0.592	0.4594	0.6719	0.883	0.559	0.4851	0.8217	0.8789	0.4316	0.7036	0.6294	0.4657	0.9418	0.9417	0.8737	0.732	0.7894	0.8094	0.0003	0.1372	<.0001	0.2888	0.7438	0.4469	0.2672	0.2322	0.2353	0.4148	0.8175	0.4078	0.7128	0.9783	0.8819	0.3731	0.8169	0.3719	0.5565	0.7243	0.9782	0.792	0.7929	0.8784	0.8784	0.6236	0.3875	0.0912	0.635	0.3417
Calcifying algae seagrass	0.3475	0.5576	0.3908	0.7072	0.7162	0.7314	0.8253	0.0509	0.1338	0.5259	0.356	0.5436	0.1299	0.6533	0.6534	0.8576	0.5711	0.7658	0.8725	0.25	0.0643	0.2888	<.0001	0.9411	0.4964	0.7048	0.3523	0.3527	0.9549	0.5287	0.5492	0.6368	0.7528	0.8468	0.9753	0.7757	0.852	0.6021	0.6457	0.862	0.6268	0.2833	0.5656	0.5656	0.6679	0.5739	0.8422	0.64	0.2247
Seagrass Biomass (g/m2)	0.3204	0.7008	0.2974	0.0565	0.7404	0.1482	0.9165	0.902	0.3813	0.6666	0.6692	0.7954	0.8415	0.2867	0.2868	0.0464	0.8668	0.4639	0.1374	0.7173	0.8568	0.7438	0.9411	<.0001	0.2415	0.5458	0.1978	0.195	0.0609	0.0594	0.9971	0.0064	0.0781	0.9923	0.2876	0.4276	0.4816	0.5313	0.0976	0.0663	0.1929	0.0521	0.2107	0.2107	0.5416	0.1849	0.4199	0.5562	0.2827
Distance Reef-Mangrove (m)	0.2454	0.3953	0.3086	0.5442	0.1229	0.0164	0.7608	0.4016	0.123	0.0503	0.4152	0.0523	0.3522	0.3709	0.3712	0.2855	0.0688	0.1821	0.1945	0.7943	0.0864	0.4469	0.4964	0.2415	<.0001	0.2348	0.8051	0.7975	0.4094	0.819	0.1719	0.1227	0.8396	0.1685	0.0028	0.0058	0.0011	0.0206	0.3756	0.0742	0.0112	0.2479	0.0145	0.0145	0.0346	0.0033	0.1009	0.554	0.2126
Temp °C reef	0.3403	0.8631	0.7466	0.8497	0.9728	0.5	0.8027	0.9986	0.9159	0.4336	0.5506	0.953	0.7662	0.3977	0.3977	0.2333	0.7421	0.1502	0.779	0.2523	0.3047	0.2672	0.7048	0.5458	0.2348	<.0001	0.999	0.9874	0.935	0.6064	0.9508	0.2177	0.2986	0.5135	0.3926	0.484	0.2795	0.0569	0.3925	0.4889	0.4632	0.7875	0.3868	0.3868	0.6606	0.1946	0.5598	0.521	0.3529
Sal psu reef	0.6544	0.4602	0.7371	0.2471	0.3404	0.454	0.9062	0.8757	0.6606	0.6272	0.5064	0.464	0.6564	0.1074	0.1074	0.4253	0.9434	0.057	0.3277	0.1428	0.6451	0.2322	0.3523	0.1978	0.8051	0.999	<.0001	<.0001	0.1552	0.5845	0.1243	0.3438	0.197	0.3234	0.5906	0.7453	0.8961	0.7939	0.4701	0.6652	0.4052	0.4247	0.3834	0.3834	0.6188	0.4895	0.9418	0.868	0.8548
TDS mg/L reef	0.6494	0.4596	0.7371	0.2464	0.3422	0.4487	0.9057	0.8758	0.6591	0.6218	0.509	0.4652	0.655	0.1055	0.1054	0.4196	0.9451	0.0551	0.325	0.1452	0.6509	0.2353	0.3527	0.195	0.7975	0.9874	<.0001	<.0001	0.1539	0.5806	0.1252	0.3373	0.1941	0.3274	0.5852	0.739	0.904	0.8038	0.465	0.6597	0.4002	0.4238	0.3784	0.3784	0.6148	0.4837	0.9467	0.8657	0.8511
ODO mg/L reef	0.8636	0.0661	0.1884	0.0025	0.4448	0.1814	0.528	0.4287	0.0792	0.2181	0.3536	0.5535	0.3754	0.1853	0.1854	0.6151	0.6707	0.4908	0.0048	0.3372	0.5468	0.4148	0.9549	0.0609	0.4094	0.935	0.1552	0.1539	<.0001	0.026	0.9195	0.084	0.104	0.9536	0.6508	0.5015	0.7388	0.8292	0.7471	0.6526	0.4221	0.2402	0.576	0.576	0.784	0.516	0.7738	0.5916	0.6795
pH reef	0.5343	0.288	0.0702	0.0694	0.8621	0.7173	0.5457	0.4402	0.1841	0.587	0.8474	0.8662	0.6439	0.2245	0.2245	0.3213	0.509	0.9697	0.0928	0.9512	0.4736	0.8175	0.5287	0.0594	0.819	0.6064	0.5845	0.5806	0.026	<.0001	0.8236	0.178	0.0328	0.5538	0.7929	0.8195	0.8099	0.9402	0.5238	0.7127	0.9267	0.6695	0.7511	0.7511	0.5911	0.9186	0.9793	0.5	0.6194
Turbidity FNU reef	0.5512	0.995	0.7782	0.6796	0.001	0.3325	0.7251	0.809	0.6182	0.602	0.8842	0.0008	0.2855	0.2386	0.2383	0.5536	0.0754	0.5312	0.6289	0.6115	0.4226	0.4078	0.5492	0.9971	0.1719	0.9508	0.1243	0.1252	0.9195	0.8236	<.0001	0.6001	0.4971	0.0134	0.3616	0.2448	0.1409	0.1434	0.5782	0.6858	0.4633	0.4187	0.4869	0.4869	0.5431	0.3801	0.2839	0.6605	0.4349
Chlorophyll µg/L reef	0.5779	0.7902	0.3759	0.0959	0.3529	0.0255	0.9506	0.6884	0.6005	0.5901	0.8448	0.4725	0.3432	0.5194	0.5195	0.1152	0.7214	0.3262	0.1911	0.6236	0.8865	0.7128	0.6368	0.0064	0.1227	0.2177	0.3438	0.3373	0.084	0.178	0.6001	<.0001	0.1541	0.3023	0.2178	0.1812	0.2289	0.1177	0.2314	0.081	0.0637	0.0655	0.0627	0.0627	0.437	0.1237	0.4274	0.6963	0.3306
BGA-PE µg/L reef	0.8675	0.8643	0.188	0.1042	0.5758	0.9327	0.4689	0.9329	0.6053	0.8521	0.5106	0.5986	0.4764	0.3079	0.3078	0.4558	0.7187	0.2951	0.2246	0.9185	0.8804	0.9783	0.7528	0.0781	0.8396	0.2986	0.197	0.1941	0.104	0.0328	0.4971	0.1541	<.0001	0.4665	0.9046	0.5795	0.6222	0.749	0.7536	0.9498	0.8624	0.8075	0.9315	0.9315	0.4396	0.4234	0.907	0.1851	0.1329
fDOM RFU reef	0.6704	0.8042	0.6697	0.991	0.0126	0.1025	0.7804	0.7512	0.9069	0.8044	0.7554	0.0282	0.1061	0.2825	0.2823	0.892	0.2079	0.9409	0.9753	0.8977	0.8312	0.8819	0.8468	0.9923	0.1685	0.5135	0.3234	0.3274	0.9536	0.5538	0.0134	0.3023	0.4665	<.0001	0.3425	0.118	0.0965	0.0231	0.7385	0.4584	0.1661	0.4613	0.1496	0.1496	0.4301	0.3612	0.5533	0.5248	0.6824
Reef Biodiversity M1	0.3028	0.6404	0.2873	0.6229	0.3405	0.0495	0.8601	0.8021	0.3526	0.0824	0.4792	0.1678	0.2607	0.4041	0.4044	0.3049	0.1161	0.1244	0.256	0.7591	0.247	0.3731	0.9753	0.2876	0.0028	0.3926	0.5906	0.5852	0.6508	0.7929	0.3616	0.2178	0.9046	0.3425	<.0001	0.0033	0.0013	0.1398	0.1505	0.0464	0.0077	0.1011	0.0066	0.0066	0.0013	0.0102	0.0132	0.3296	0.4236
Reef Biodiversity M2	0.3486	0.3313	0.3676	0.6619	0.1134	0.0036	0.3868	0.6122	0.2943	0.066	0.5172	0.0933	0.0522	0.4579	0.4582	0.3663	0.1646	0.2821	0.2766	0.7882	0.2681	0.8169	0.7757	0.4276	0.0058	0.484	0.7453	0.739	0.5015	0.8195	0.2448	0.1812	0.5795	0.118	0.0033	<.0001	0.0003	0.1128	0.2569	0.0432	0.0006	0.1286	0.0034	0.0034	0.0011	0.0913	0.0844	0.2605	0.9322
Mangrove M1	0.2932	0.522	0.259	0.8458	0.1074	0.0229	0.5756	0.581	0.3095	0.0673	0.3434	0.0685	0.1885	0.5535	0.5538	0.3521	0.1534	0.3209	0.3504	0.6895	0.1325	0.3719	0.852	0.4816	0.0011	0.2795	0.8961	0.904	0.7388	0.8099	0.1409	0.2289	0.6222	0.0965	0.0013	0.0003	<.0001	0.0501	0.2542	0.0489	0.0069	0.2185	0.0116	0.0116	0.0038	0.0436	0.0393	0.3236	0.6254
Mangrove M2	0.6204	0.936	0.3949	0.9623	0.1574	0.0729	0.6452	0.932	0.6829	0.4474	0.4763	0.1168	0.5098	0.9863	0.9866	0.4723	0.2094	0.287	0.7801	0.7747	0.384	0.5565	0.6021	0.5313	0.0206	0.0569	0.7939	0.8038	0.8292	0.9402	0.1434	0.1177	0.749	0.0231	0.1398	0.1128	0.0501	<.0001	0.8843	0.2912	0.0942	0.6768	0.0604	0.0604	0.3836	0.0274	0.5181	0.8799	0.136
Seagrass M1	0.052	0.9143	0.9154	0.8086	0.7014	0.3591	0.392	0.8486	0.7793	0.5597	0.1768	0.6258	0.9868	0.1819	0.1819	0.009	0.5277	0.4881	0.5756	0.7005	0.7	0.7243	0.6457	0.0976	0.3756	0.3925	0.4701	0.465	0.7471	0.5238	0.5782	0.2314	0.7536	0.7385	0.1505	0.2569	0.2542	0.8843	<.0001	0.0119	0.1762	0.196	0.2076	0.2076	0.1145	0.4788	0.161	0.1903	0.8643
Seagrass M2	0.0578	0.8185	0.7487	0.7778	0.4982	0.0369	0.3948	1	0.5571	0.5455	0.0619	0.5535	0.5377	0.4201	0.4202	0.0092	0.7303	0.6018	0.6338	0.8665	0.6599	0.9782	0.862	0.0663	0.0742	0.4889	0.6652	0.6597	0.6526	0.7127	0.6858	0.081	0.9498	0.4584	0.0464	0.0432	0.0489	0.2912	0.0119	<.0001	0.0115	0.0783	0.0188	0.0188	0.0476	0.1889	0.2109	0.03	0.8125
Trophic level (Fish Base)	0.2601	0.4815	0.4749	0.5946	0.2374	0.0003	0.5034	0.8807	0.4205	0.2096	0.4078	0.2084	0.0867	0.4108	0.411	0.1551	0.2254	0.1941	0.3866	0.4679	0.5722	0.792	0.6268	0.1929	0.0112	0.4632	0.4052	0.4002	0.4221	0.9267	0.4633	0.0637	0.8624	0.1661	0.0077	0.0006	0.0069	0.0942	0.1762	0.0115	<.0001	0.0789	<.0001	<.0001	0.008	0.0602	0.2102	0.1658	0.7635
Trophic level Avg all species	0.9898	0.9398	0.4593	0.078	0.2853	0.0937	0.9385	0.4587	0.7735	0.6997	0.9817	0.2917	0.1149	0.9796	0.9798	0.452	0.3676	0.7346	0.1981	0.5477	0.7774	0.7929	0.2833	0.0521	0.2479	0.7875	0.4247	0.4238	0.2402	0.6695	0.4187	0.0655	0.8075	0.4613	0.1011	0.1286	0.2185	0.6768	0.196	0.0783	0.0789	<.0001	0.0854	0.0854	0.1429	0.2784	0.0868	0.1799	0.7135
Vulnerability (Fish Base)	0.343	0.7694	0.4171	0.6772	0.3219	0.0025	0.8244	0.8471	0.641	0.3284	0.4234	0.2426	0.1191	0.5473	0.5475	0.1769	0.1987	0.1332	0.5307	0.526	0.739	0.8784	0.5656	0.2107	0.0145	0.3868	0.3834	0.3784	0.576	0.7511	0.4869	0.0627	0.9315	0.1496	0.0066	0.0034	0.0116	0.0604	0.2076	0.0188	<.0001	0.0854	<.0001	<.0001	0.0155	0.0308	0.2122	0.1853	0.5716
Vulnerability (Fish Base)/10	0.343	0.7694	0.4171	0.6772	0.3219	0.0025	0.8244	0.8471	0.641	0.3284	0.4234	0.2426	0.1191	0.5473	0.5475	0.1769	0.1987	0.1332	0.5307	0.526	0.739	0.8784	0.5656	0.2107	0.0145	0.3868	0.3834	0.3784	0.576	0.7511	0.4869	0.0627	0.9315	0.1496	0.0066	0.0034	0.0116	0.0604	0.2076	0.0188	<.0001	0.0854	<.0001	<.0001	0.0155	0.0308	0.2122	0.1853	0.5716
Resilience high (No of species, Fish Base)	0.2606	0.4378	0.2541	0.8749	0.4113	0.0587	0.377	0.7017	0.4058	0.0782	0.4556	0.2952	0.139	0.3545	0.3547	0.352	0.2687	0.2435	0.3688	0.9852	0.3191	0.6236	0.6679	0.5416	0.0346	0.6606	0.6188	0.6148	0.784	0.5911	0.5431	0.437	0.4396	0.4301	0.0013	0.0011	0.0038	0.3836	0.1145	0.0476	0.008	0.1429	0.0155	0.0155	<.0001	0.1453	0.0339	0.1861	0.8746
Resilience medium	0.4296	0.8647	0.3569	0.49	0.432	0.1022	0.5276	0.8387	0.3482	0.2013	0.6208	0.1763	0.6475	0.4744	0.4747	0.3465	0.0659	0.0542	0.2976	0.735	0.2906	0.3875	0.5739	0.1849	0.0033	0.1946	0.4895	0.4837	0.516	0.9186	0.3801	0.1237	0.4234	0.3612	0.0102	0.0913	0.0436	0.0274	0.4788	0.1889	0.0602	0.2784	0.0308	0.0308	0.1453	<.0001	0.1474	0.8177	0.0274
Resilience low	0.7437	0.9353	0.8049	0.4531	0.393	0.385	0.9051	0.9191	0.5986	0.1629	0.8535	0.2625	0.3893	0.7487	0.7489	0.6808	0.3533	0.4769	0.1859	0.2494	0.2867	0.0912	0.8422	0.4199	0.1009	0.5598	0.9418	0.9467	0.7738	0.9793	0.2839	0.4274	0.907	0.5533	0.0132	0.0844	0.0393	0.5181	0.161	0.2109	0.2102	0.0868	0.2122	0.2122	0.0339	0.1474	<.0001	0.5598	0.6037
Resilience very low	0.3381	0.7087	0.5804	0.6362	0.5914	0.305	0.4851	0.6754	0.8304	0.6703	0.0622	0.6443	0.5659	0.7389	0.7388	0.2386	0.73	0.5629	0.5376	0.5733	0.6227	0.635	0.64	0.5562	0.554	0.521	0.868	0.8657	0.5916	0.5	0.6605	0.6963	0.1851	0.5248	0.3296	0.2605	0.3236	0.8799	0.1903	0.03	0.1658	0.1799	0.1853	0.1853	0.1861	0.8177	0.5598	<.0001	0.6382
Resilience high %	0.9377	0.6007	0.8106	0.4741	0.6935	0.7362	0.0953	0.9496	0.63	0.8477	0.8785	0.371	0.5353	0.9779	0.9777	0.7377	0.1943	0.3753	0.589	0.4771	0.585	0.3417	0.2247	0.2827	0.2126	0.3529	0.8548	0.8511	0.6795	0.6194	0.4349	0.3306	0.1329	0.6824	0.4236	0.9322	0.6254	0.136	0.8643	0.8125	0.7635	0.7135	0.5716	0.5716	0.8746	0.0274	0.6037	0.6382	<.0001
Resilience medium %	0.7819	0.5752	0.9412	0.8128	0.8413	0.7657	0.1021	0.9692	0.9375	0.6298	0.841	0.8942	0.2669	0.8425	0.8424	0.9163	0.5592	0.5766	0.8754	0.8777	0.9745	0.8895	0.2275	0.7183	0.8481	0.5114	0.8202	0.819	0.842	0.6622	0.9407	0.7193	0.1102	0.9922	0.6711	0.3691	0.5484	0.3443	0.2821	0.4884	0.6015	0.4962	0.8031	0.8031	0.1871	0.3383	0.3805	0.2584	0.0128
Resilience low %	0.6762	0.8414	0.8821	0.3387	0.3343	0.3539	0.9204	0.9484	0.44	0.1456	0.8152	0.2126	0.4618	0.6863	0.6866	0.6114	0.3046	0.514	0.1247	0.25	0.2261	0.0957	0.9683	0.2969	0.0743	0.5771	0.9575	0.9623	0.6195	0.813	0.2451	0.3552	0.9369	0.5832	0.0139	0.0948	0.0421	0.4916	0.165	0.188	0.2146	0.0726	0.2262	0.2262	0.0496	0.1132	<.0001	0.5762	0.4622
Resilience very low %	0.3381	0.7087	0.5804	0.6362	0.5914	0.305	0.4851	0.6754	0.8304	0.6703	0.0622	0.6443	0.5659	0.7389	0.7388	0.2386	0.73	0.5629	0.5376	0.5733	0.6227	0.635	0.64	0.5562	0.554	0.521	0.868	0.8657	0.5916	0.5	0.6605	0.6963	0.1851	0.5248	0.3296	0.2605	0.3236	0.8799	0.1903	0.03	0.1658	0.1799	0.1853	0.1853	0.1861	0.8177	0.5598	<.0001	0.6382
Substrate complexity high (number of species, RLS Team)	0.4361	0.3149	0.8908	0.9216	0.6881	0.9201	0.7864	0.2956	0.5834	0.9753	0.2516	0.809	0.8276	0.9282	0.9281	0.262	0.8472	0.7954	1	0.1611	0.9469	0.1538	0.1755	0.4027	0.6117	0.7385	0.9675	0.9649	0.5222	0.7692	0.9537	0.6786	0.8315	0.8229	0.1684	0.4908	0.3738	0.9295	0.019	0.1215	0.4662	0.1493	0.3938	0.3938	0.1633	0.4982	0.0443	0.1627	0.8338
Substrate complexity medium	0.2516	0.4161	0.1586	0.7785	0.0938	0.0204	0.6532	0.3652	0.1451	0.0895	0.2946	0.03	0.3099	0.5318	0.5321	0.3731	0.0315	0.3285	0.361	0.9499	0.1297	0.5566	0.4818	0.4081	0.0001	0.4933	0.9508	0.9457	0.6218	0.8539	0.1311	0.2733	0.7398	0.1427	0.0041	0.0043	0.0012	0.0436	0.4722	0.0703	0.0101	0.2679	0.0146	0.0146	0.0221	0.0139	0.1424	0.3079	0.3287
Substrate complexity low	0.4812	0.8077	0.5084	0.5118	0.7351	0.1741	0.9152	0.8614	0.6017	0.1138	0.849	0.4696	0.3069	0.3455	0.3457	0.3983	0.303	0.0546	0.2143	0.6586	0.4135	0.3164	0.6023	0.3042	0.0474	0.3615	0.3611	0.3566	0.6496	0.8157	0.7193	0.2639	0.858	0.6675	0.0008	0.0334	0.0284	0.3452	0.1056	0.1327	0.0481	0.1021	0.0351	0.0351	0.0068	0.0347	0.0057	0.5824	0.5289
Substrate complexity high %	0.568	0.3907	0.5112	0.9278	0.2457	0.8387	0.8789	0.1787	0.2922	0.6216	0.595	0.1655	0.8878	0.7535	0.7533	0.2448	0.1417	0.905	0.8265	0.7001	0.4361	0.8492	0.1485	0.4796	0.6418	0.8049	0.6183	0.6163	0.6884	0.9644	0.2749	0.7116	0.9827	0.4435	0.7171	0.948	0.9902	0.4235	0.0213	0.2931	0.8113	0.3667	0.7732	0.7732	0.5253	0.7273	0.3726	0.3393	0.4226
Substrate complexity medium %	0.4612	0.8711	0.9749	0.5775	0.4058	0.578	0.8851	0.4441	0.8892	0.4696	0.9558	0.5516	0.7211	0.2408	0.2408	0.2418	0.845	0.075	0.4193	0.7416	0.9673	0.5717	0.2659	0.2437	0.4824	0.4012	0.1358	0.1335	0.7394	0.9442	0.4039	0.3475	0.5226	0.5828	0.1073	0.3528	0.3875	0.9608	0.0266	0.2323	0.2754	0.1977	0.221	0.221	0.124	0.2906	0.0867	0.7165	0.8769
Substrate complexity low %	0.4861	0.9057	0.8335	0.4593	0.5522	0.4317	0.8103	0.6482	0.8306	0.2561	0.8936	0.8098	0.6141	0.1716	0.1716	0.3189	0.7846	0.0158	0.2595	0.7924	0.7292	0.5253	0.4052	0.2401	0.2738	0.3367	0.0887	0.0867	0.5643	0.944	0.534	0.3004	0.4242	0.6953	0.0507	0.246	0.2723	0.7156	0.078	0.2857	0.1957	0.2143	0.1474	0.1474	0.091	0.1223	0.0748	0.9229	0.6168
Total Biomass (g)	0.6195	0.6931	0.2132	0.5509	0.4748	0.0672	0.8777	0.5441	0.673	0.738	0.4056	0.4194	0.2106	0.9287	0.9286	0.438	0.4054	0.2263	0.6701	0.6895	0.965	0.9598	0.4947	0.8658	0.1285	0.2203	0.8543	0.8469	0.675	0.2555	0.5145	0.2809	0.5656	0.0504	0.1165	0.0568	0.0651	0.0263	0.5827	0.1775	0.027	0.545	0.0097	0.0097	0.1306	0.1574	0.5821	0.3384	0.7741
Total Biomass tonnes / hectare	0.4695	0.5112	0.9175	0.8668	0.8687	0.6498	0.8131	0.4443	0.6637	0.335	0.1678	0.8907	0.9563	0.7684	0.7684	0.2612	0.9258	0.5878	0.5122	0.4347	0.2763	0.4363	0.5736	0.3843	0.9805	0.2893	0.7004	0.7056	0.6989	0.6824	0.8344	0.7804	0.5119	0.8753	0.6215	0.7384	0.8696	0.6578	0.2297	0.1094	0.436	0.1841	0.4169	0.4169	0.5087	0.954	0.8276	0.0026	0.8337
Biomass <10cm %	0.265	0.8891	0.0333	0.3783	0.8657	0.2834	0.9142	0.9233	0.8929	0.2651	0.2978	0.5774	0.7169	0.53	0.5302	0.3953	0.3928	0.0673	0.91	0.4948	0.3257	0.2615	0.8612	0.9919	0.0587	0.0817	0.9045	0.8962	0.5084	0.2954	0.7213	0.6361	0.7116	0.3506	0.0336	0.0831	0.0336	0.0597	0.3935	0.2611	0.1009	0.9272	0.058	0.058	0.0643	0.0537	0.2517	0.6674	0.5075
≤10	0.269	0.4631	0.47	0.5077	0.2749	0.0011	0.5466	0.8638	0.3672	0.2173	0.4406	0.2055	0.1015	0.3919	0.3921	0.1703	0.1621	0.1898	0.3406	0.4113	0.6134	0.7542	0.6548	0.1574	0.0129	0.6383	0.31	0.3068	0.3809	0.9249	0.5061	0.0814	0.8943	0.253	0.0056	0.0017	0.013	0.1516	0.1796	0.0126	<.0001	0.0516	<.0001	<.0001	0.0074	0.0491	0.1954	0.1408	0.6891
≤12.5-≥20	0.3179	0.8955	0.1005	0.5789	0.6539	0.0757	0.9757	0.821	0.9955	0.3965	0.312	0.4743	0.3578	0.629	0.6292	0.2818	0.3418	0.075	0.9254	0.97	0.6405	0.7035	0.7435	0.7228	0.0457	0.1392	0.6644	0.6568	0.7422	0.3267	0.6645	0.3102	0.7143	0.1742	0.0266	0.03	0.024	0.0321	0.3455	0.1165	0.0157	0.5504	0.0047	0.0047	0.0435	0.0503	0.337	0.3908	0.5978
≥25	0.8413	0.9958	0.2987	0.7805	0.7671	0.9522	0.9072	0.9026	0.9753	0.194	0.8667	0.9186	0.5918	0.5819	0.582	0.8975	0.6607	0.1927	0.6232	0.2831	0.4338	0.1099	0.6051	0.6949	0.4495	0.5629	0.8168	0.8136	0.5959	0.3106	0.9839	0.7499	0.5796	0.9202	0.1008	0.2826	0.2198	0.9215	0.3767	0.7678	0.529	0.6965	0.4755	0.4755	0.0709	0.4184	0.0365	0.9883	0.8812
Total Biomass Reef	0.62	0.6198	0.2744	0.7701	0.4415	0.0698	0.7804	0.4401	0.7109	0.5863	0.4235	0.3429	0.1756	0.9534	0.9533	0.3994	0.3347	0.2034	0.9432	0.988	0.9216	0.6815	0.42	0.6595	0.0726	0.2414	0.8475	0.8401	0.7185	0.2865	0.4138	0.2297	0.5841	0.0746	0.023	0.0225	0.0196	0.0485	0.3117	0.0907	0.0141	0.246	0.0034	0.0034	0.0359	0.0851	0.1745	0.246	0.6872
Total Biomass Mangrove	0.9767	0.9646	0.4334	0.8776	0.3783	0.1626	0.6501	0.8317	0.9277	0.4238	0.9548	0.3478	0.2758	0.968	0.9682	0.8798	0.4392	0.1393	0.8847	0.9546	0.6072	0.7129	0.7931	0.9646	0.1472	0.0469	0.9925	0.9821	0.9513	0.6106	0.3977	0.2698	0.8958	0.0473	0.2808	0.1662	0.1373	0.0066	0.8876	0.7027	0.1793	0.9741	0.1225	0.1225	0.4245	0.1575	0.677	0.6797	0.5131
Total Biomass Seagrass	0.1748	0.1093	0.4147	0.6016	0.249	0.1408	0.1523	0.1441	0.0447	0.0125	0.4654	0.1847	0.3689	0.2031	0.2033	0.4244	0.2678	0.5758	0.1148	0.7191	0.041	0.443	0.6012	0.4725	0.0355	0.8551	0.9194	0.9163	0.4467	0.7844	0.3837	0.595	0.6109	0.6909	0.0212	0.0184	0.0171	0.6001	0.1955	0.1143	0.0888	0.2596	0.1815	0.1815	0.0082	0.2414	0.044	0.3747	0.9739
Abudefduf saxatilis	0.789	0.5717	0.9294	0.482	0.2079	0.0201	0.9986	0.887	0.5579	0.5212	0.9655	0.2591	0.2395	0.7108	0.711	0.4841	0.3695	0.2636	0.5298	0.3331	0.7646	0.4714	0.9419	0.3373	0.1163	0.2119	0.5486	0.5414	0.2431	0.6454	0.4369	0.0371	0.4623	0.0765	0.4136	0.1818	0.2491	0.0139	0.932	0.4106	0.086	0.5799	0.0795	0.0795	0.6249	0.1552	0.8905	0.9447	0.3904
Acanthurus bahianus	0.9708	0.8951	0.4143	0.9692	0.8407	0.7943	0.81	0.9781	0.8869	0.1034	0.6716	0.6119	0.4706	0.6556	0.6557	0.756	0.5772	0.1812	0.4287	0.184	0.2417	0.0559	0.7599	0.6998	0.2995	0.2744	0.9368	0.9433	0.8066	0.4986	0.642	0.9992	0.7782	0.683	0.1101	0.2267	0.141	0.5319	0.5829	0.9061	0.5229	0.7827	0.4798	0.4798	0.1189	0.3212	0.0326	0.6173	0.9123
Acanthurus chirurgus	0.9013	0.7021	0.5712	0.6324	0.5966	0.3065	0.5776	0.6681	0.6167	0.8764	0.8928	0.6449	0.5621	0.7409	0.7408	0.8529	0.7052	0.3869	0.5397	0.586	0.8177	0.6523	0.8471	0.8817	0.4994	0.1527	0.9914	0.9838	0.886	0.6281	0.659	0.3654	0.8395	0.0877	0.875	0.583	0.5854	0.0286	0.5426	0.9124	0.4123	0.6761	0.3016	0.3016	0.9355	0.4343	0.4771	0.7627	0.556
Acanthurus coeruleus	0.4291	0.4361	0.0845	0.6012	0.3155	0.3412	0.7188	0.203	0.2802	0.0462	0.5941	0.2032	0.6997	0.5018	0.502	0.8737	0.2844	0.2729	0.6145	0.3193	0.019	0.1603	0.2745	0.6984	0.045	0.0981	0.5486	0.5563	0.912	0.7187	0.2747	0.829	0.7493	0.2287	0.1508	0.1207	0.0415	0.0494	0.9889	0.6932	0.3057	0.6462	0.3243	0.3243	0.2174	0.1467	0.3676	0.6912	0.5383
Anisotremus virginicus	0.7109	0.8719	0.049	0.002	0.606	0.6206	0.4782	0.7528	0.5244	0.86	0.423	0.6406	0.8877	0.8027	0.8028	0.6997	0.7702	0.8275	0.066	0.9777	0.9885	0.9902	0.993	0.0224	0.6464	0.8838	0.4431	0.4414	0.0386	0.036	0.6958	0.0776	0.0272	0.9223	0.7757	0.9674	0.9634	0.8545	0.6979	0.7289	0.8647	0.1263	0.8653	0.8653	0.7665	0.4287	0.4941	0.6533	0.1786
Apogon townsendi	0.0415	0.5453	0.895	0.8603	0.5622	0.4827	0.4297	0.4966	0.3916	0.9602	0.22	0.475	0.3455	0.1125	0.1125	0.0182	0.5472	0.568	0.8759	0.5692	0.7845	0.3946	0.4462	0.1187	0.6488	0.4265	0.2962	0.2935	0.3872	0.1453	0.309	0.272	0.1798	0.55	0.9882	0.9893	0.9456	0.6634	0.3341	0.277	0.5801	0.9003	0.6325	0.6325	0.8444	0.6134	0.3953	0.7855	0.5825
Aulostomus maculatus	0.8599	0.7087	0.5804	0.6362	0.0117	0.3693	0.5866	0.6754	0.5952	0.6081	0.7819	0.0956	0.3791	0.5228	0.5226	0.962	0.7701	0.2815	0.5376	0.5733	0.3715	0.6112	0.7188	0.8301	0.4155	0.6692	0.0903	0.0923	0.6555	0.514	0.0216	0.4303	0.6672	0.059	0.7513	0.3574	0.2673	0.3287	1	0.5733	0.6231	0.567	0.7872	0.7872	0.7494	0.9771	0.4619	0.7681	0.9183
Bodianus rufus	0.7823	0.7087	0.5804	0.9267	0.8833	0.9805	0.5866	0.6754	0.7772	0.2915	0.7168	0.6798	0.5659	0.9956	0.9956	0.6958	0.709	0.3775	0.6008	0.1052	0.4316	0.0303	0.64	0.6928	0.4654	0.3654	0.7144	0.7196	0.5904	0.4406	0.5754	0.9388	0.7027	0.6854	0.1648	0.3574	0.2163	0.6701	0.5371	0.9115	0.6943	0.6683	0.6126	0.6126	0.1861	0.4428	0.0186	0.7681	0.9183
Canthigaster rostrata	0.5379	0.419	0.9364	0.4202	0.0011	0.2483	0.9156	0.4282	0.3135	0.2996	0.6658	0.0068	0.2005	0.605	0.6046	0.4914	0.1715	0.7556	0.2992	0.879	0.248	0.6939	0.5415	0.9982	0.2055	0.7242	0.2872	0.2901	0.3991	0.7025	0.0052	0.4667	0.8603	0.0289	0.5925	0.275	0.227	0.1424	0.3886	0.9944	0.526	0.6884	0.6326	0.6326	0.7428	0.5205	0.5704	0.7175	0.6123
Carangoides ruber	0.8882	0.6469	0.5164	0.6063	0.6636	0.3254	0.5129	0.6027	0.5619	0.9313	0.9308	0.6778	0.5465	0.7658	0.7657	0.8691	0.6973	0.2962	0.5499	0.6715	0.8337	0.7677	0.7783	0.8496	0.4746	0.119	0.9518	0.9438	0.8234	0.548	0.6932	0.38	0.8445	0.096	0.7798	0.5452	0.5348	0.0267	0.5973	0.9157	0.3938	0.6922	0.2718	0.2718	0.9736	0.3818	0.5851	0.7293	0.5435
Cephalopholis cruentata	0.4732	0.9742	0.2411	0.5471	0.0979	0.8982	0.8594	0.7999	0.7844	0.7865	0.9517	0.2791	0.8827	0.245	0.2449	0.5627	0.9896	0.0236	0.7301	0.5711	0.7525	0.7447	0.5735	0.9652	0.8663	0.6124	0.0567	0.0564	0.7577	0.3913	0.0836	0.9137	0.7777	0.4028	0.5506	0.8252	0.967	0.9471	0.6232	0.8801	0.5646	0.7454	0.4273	0.4273	0.5256	0.4746	0.8351	0.9149	0.9194
Chaetodipterus faber	0.3381	0.7087	0.5804	0.6362	0.5914	0.305	0.4851	0.6754	0.8304	0.6703	0.0622	0.6443	0.5659	0.7389	0.7388	0.2386	0.73	0.5629	0.5376	0.5733	0.6227	0.635	0.64	0.5562	0.554	0.521	0.868	0.8657	0.5916	0.5	0.6605	0.6963	0.1851	0.5248	0.3296	0.2605	0.3236	0.8799	0.1903	0.03	0.1658	0.1799	0.1853	0.1853	0.1861	0.8177	0.5598	<.0001	0.6382
Chaetodon capistratus	0.132	0.168	0.9972	0.6213	0.7471	0.3927	0.1064	0.4696	0.3041	0.0661	0.7977	0.6743	0.6111	0.0178	0.0178	0.1922	0.6072	0.2484	0.1645	0.8458	0.2624	0.7687	0.6488	0.3903	0.4099	0.4572	0.3009	0.2969	0.3711	0.4712	0.4528	0.5085	0.8108	0.541	0.2037	0.1933	0.2717	0.8542	0.0299	0.226	0.2655	0.4906	0.3974	0.3974	0.0796	0.6935	0.1976	0.8258	0.4315
Chaetodon ocellatus	0.8682	0.4071	0.8449	0.4655	0.0528	0.3102	0.7408	0.3495	0.2592	0.9518	0.9068	0.0908	0.6069	0.6641	0.6638	0.8657	0.2322	0.4193	0.6769	0.3171	0.7631	0.3477	0.3302	0.6585	0.5137	0.5609	0.6699	0.6678	0.3128	0.4983	0.1473	0.5388	0.9586	0.2478	0.843	0.7501	0.8256	0.4211	0.293	0.8852	0.6885	0.7892	0.8126	0.8126	0.6886	0.7842	0.4734	0.8	0.54
Chaetodon striatus	0.6463	0.1977	0.3596	0.9431	0.6143	0.661	0.4136	0.2206	0.2354	0.0054	0.7908	0.477	0.4743	0.2779	0.2781	0.8152	0.5418	0.3401	0.1978	0.3075	0.0307	0.1402	0.7734	0.6774	0.2387	0.5058	0.896	0.9008	0.81	0.8473	0.6294	0.8145	0.6326	0.8765	0.1544	0.1629	0.1227	0.7529	0.6341	0.8825	0.517	0.9681	0.6376	0.6376	0.0919	0.5036	0.085	0.6311	0.7565
Chromis multilineata	0.3293	0.0001	0.5804	0.7754	0.5914	0.4233	0.0149	0.0036	0.0153	0.0314	0.9387	0.6443	0.5659	0.0752	0.0752	0.9022	0.709	0.7035	0.2146	0.5733	0.0843	0.6834	0.4785	0.9056	0.4732	0.8679	0.6697	0.6694	0.2505	0.5527	0.9418	0.8561	0.7783	0.8082	0.7127	0.3574	0.5211	0.9039	1	0.9115	0.5651	0.7266	0.862	0.862	0.4202	0.9771	0.9428	0.7681	0.4212
Coryphopterus glaucofraenum	0.5583	0.1593	0.3772	0.9358	0.3372	0.088	0.3638	0.2643	0.3132	0.1683	0.9531	0.3896	0.2738	0.378	0.3781	0.7653	0.4883	0.261	0.6329	0.4391	0.3152	0.6009	0.8169	0.9252	0.1861	0.2746	0.7399	0.7331	0.4742	0.9997	0.6622	0.4544	0.9589	0.2059	0.5151	0.1583	0.2348	0.0935	0.7466	0.7355	0.1778	0.7174	0.2312	0.2312	0.4572	0.4282	0.7391	0.7147	0.9698
Coryphopterus personatus	0.3094	0.8671	0.7918	0.7758	0.3307	0.0721	0.3892	0.8492	0.7376	0.848	0.1633	0.3794	0.2625	0.9189	0.9191	0.1676	0.4964	0.8847	0.8225	0.4567	0.8956	0.6042	0.5744	0.2248	0.2392	0.6656	0.7988	0.799	0.7946	0.8691	0.5066	0.2886	0.4124	0.4088	0.1217	0.0718	0.1322	0.6644	0.1108	0.0049	0.0339	0.0319	0.0541	0.0541	0.0633	0.4865	0.2976	0.0008	0.799
Diodon hystrix	0.7823	0.7087	0.5804	0.9267	0.8833	0.9805	0.5866	0.6754	0.7772	0.2915	0.7168	0.6798	0.5659	0.9956	0.9956	0.6958	0.709	0.3775	0.6008	0.1052	0.4316	0.0303	0.64	0.6928	0.4654	0.3654	0.7144	0.7196	0.5904	0.4406	0.5754	0.9388	0.7027	0.6854	0.1648	0.3574	0.2163	0.6701	0.5371	0.9115	0.6943	0.6683	0.6126	0.6126	0.1861	0.4428	0.0186	0.7681	0.9183
Echeneis neucratoides	0.7823	0.7087	0.5804	0.9267	0.8833	0.9805	0.5866	0.6754	0.7772	0.2915	0.7168	0.6798	0.5659	0.9956	0.9956	0.6958	0.709	0.3775	0.6008	0.1052	0.4316	0.0303	0.64	0.6928	0.4654	0.3654	0.7144	0.7196	0.5904	0.4406	0.5754	0.9388	0.7027	0.6854	0.1648	0.3574	0.2163	0.6701	0.5371	0.9115	0.6943	0.6683	0.6126	0.6126	0.1861	0.4428	0.0186	0.7681	0.9183
Elacatinus xanthiprora	0.6238	0.574	0.4008	0.4745	0.4152	0.1002	0.9834	0.5278	0.5759	0.6772	0.2201	0.4854	0.3823	0.6167	0.6166	0.3664	0.5871	0.7394	0.3466	0.3917	0.6037	0.4729	0.6481	0.8019	0.332	0.4745	0.9209	0.9257	0.6486	0.3986	0.5059	0.2962	0.5356	0.0462	0.4633	0.2263	0.2662	0.0597	0.7953	0.1827	0.0921	0.6599	0.0595	0.0595	0.4745	0.4192	0.8061	0.1738	0.8464
Equetus punctatus	0.7823	0.7087	0.5804	0.9267	0.8833	0.9805	0.5866	0.6754	0.7772	0.2915	0.7168	0.6798	0.5659	0.9956	0.9956	0.6958	0.709	0.3775	0.6008	0.1052	0.4316	0.0303	0.64	0.6928	0.4654	0.3654	0.7144	0.7196	0.5904	0.4406	0.5754	0.9388	0.7027	0.6854	0.1648	0.3574	0.2163	0.6701	0.5371	0.9115	0.6943	0.6683	0.6126	0.6126	0.1861	0.4428	0.0186	0.7681	0.9183
Ginglymostoma cirratum	0.6664	0.7385	0.0469	0.0002	0.5914	0.417	0.5866	0.6754	0.5485	0.8341	0.3255	0.6443	0.5659	0.7358	0.7359	0.692	0.709	0.6852	0.0544	0.5733	0.8127	0.635	0.666	0.0172	0.6393	0.9807	0.2319	0.231	0.0148	0.0621	0.8017	0.0471	0.0437	0.9834	0.7127	0.8592	1	0.8799	0.6837	0.654	0.6411	0.0659	0.6523	0.6523	0.922	0.4428	0.5598	0.7681	0.3007
Gymnothorax funebris	0.3381	0.7087	0.5804	0.6362	0.5914	0.305	0.4851	0.6754	0.8304	0.6703	0.0622	0.6443	0.5659	0.7389	0.7388	0.2386	0.73	0.5629	0.5376	0.5733	0.6227	0.635	0.64	0.5562	0.554	0.521	0.868	0.8657	0.5916	0.5	0.6605	0.6963	0.1851	0.5248	0.3296	0.2605	0.3236	0.8799	0.1903	0.03	0.1658	0.1799	0.1853	0.1853	0.1861	0.8177	0.5598	<.0001	0.6382
Haemulon carbonarium	0.7183	0.4118	0.4212	0.7694	0.4352	0.1548	0.6431	0.5008	0.6103	0.4516	0.9261	0.5038	0.403	0.6334	0.6335	0.8109	0.5903	0.3216	0.984	0.4122	0.5818	0.5138	0.858	0.8485	0.3151	0.2341	0.8251	0.8182	0.6702	0.8917	0.7094	0.459	0.9606	0.1652	0.753	0.3264	0.4064	0.0645	0.5672	0.8735	0.283	0.5681	0.2963	0.2963	0.7609	0.4871	0.4716	0.6713	0.8869
Haemulon flavolineatum	0.3467	0.8888	0.4654	0.8794	0.5446	0.6218	0.767	0.7874	0.5596	0.9078	0.5342	0.8891	0.5484	0.4248	0.4248	0.3433	0.4152	0.3031	0.9551	0.3343	0.8303	0.4389	0.5331	0.3332	0.5621	0.8776	0.1233	0.1246	0.6916	0.9283	0.4722	0.672	0.4093	0.55	0.6673	0.9994	0.9248	0.725	0.8847	0.5744	0.5479	0.8705	0.4516	0.4516	0.9582	0.2392	0.5462	0.6766	0.1971
Haemulon macrostomum	0.9042	0.7087	0.5804	0.6362	0.5914	0.305	0.5866	0.6754	0.6229	0.8667	0.8875	0.6443	0.5659	0.7389	0.7388	0.8488	0.709	0.3997	0.5376	0.5733	0.8127	0.635	0.8547	0.8877	0.5049	0.1582	0.9935	0.9861	0.8947	0.6401	0.6585	0.3635	0.8371	0.088	0.8895	0.5902	0.595	0.0294	0.5371	0.9115	0.4157	0.6743	0.3063	0.3063	0.922	0.4428	0.4619	0.7681	0.5586
Haemulon plumierii	0.335	0.7171	0.5279	0.6551	0.5407	0.2667	0.5028	0.6707	0.853	0.8017	0.0679	0.5714	0.4921	0.7684	0.7683	0.2425	0.6648	0.6561	0.6164	0.6783	0.7226	0.7817	0.6136	0.5562	0.451	0.609	0.8504	0.8488	0.5862	0.4622	0.588	0.6612	0.1721	0.4662	0.2261	0.1828	0.2238	0.8004	0.1532	0.0216	0.1246	0.1459	0.1394	0.1394	0.1153	0.7113	0.4004	<.0001	0.6623
Haemulon sciurus	0.8079	0.6848	0.5631	0.9206	0.8557	0.9747	0.5685	0.6895	0.7978	0.2965	0.7712	0.6439	0.605	0.9742	0.9741	0.7156	0.6782	0.4025	0.6056	0.0862	0.4071	0.0217	0.7033	0.715	0.4388	0.3658	0.6693	0.6744	0.5725	0.4487	0.5329	0.94	0.7017	0.6749	0.1537	0.3571	0.2035	0.6493	0.5264	0.8817	0.6959	0.6559	0.6122	0.6122	0.1854	0.4151	0.0148	0.801	0.8607
Halichoeres bivittatus	0.9761	0.7797	0.5112	0.5956	0.6346	0.2578	0.7042	0.6909	0.6379	0.9266	0.8664	0.6923	0.478	0.9051	0.905	0.762	0.7788	0.2782	0.6178	0.6817	0.9472	0.7714	0.7386	0.873	0.4217	0.0888	0.9487	0.9398	0.8741	0.5963	0.7144	0.3443	0.8998	0.09	0.7072	0.4307	0.4354	0.0257	0.736	0.8018	0.3168	0.7152	0.2293	0.2293	0.834	0.4032	0.6536	0.7764	0.6834
Holacanthus ciliaris	0.5433	0.9679	0.6424	0.8685	0.527	0.8682	0.6212	0.294	0.2442	0.5242	0.4602	0.3332	0.2192	0.8805	0.8807	0.7944	0.4071	0.9385	0.5881	0.0729	0.0819	0.0668	0.0045	0.6404	0.2763	0.4595	0.3419	0.3441	0.9429	0.4466	0.2721	0.8985	0.4802	0.8891	0.6067	0.9784	0.5628	0.3658	0.9378	0.8863	0.8187	0.7928	0.8381	0.8381	0.8738	0.2308	0.506	0.681	0.0384
Holocentrus rufus	0.3381	0.7087	0.5804	0.6362	0.5914	0.305	0.4851	0.6754	0.8304	0.6703	0.0622	0.6443	0.5659	0.7389	0.7388	0.2386	0.73	0.5629	0.5376	0.5733	0.6227	0.635	0.64	0.5562	0.554	0.521	0.868	0.8657	0.5916	0.5	0.6605	0.6963	0.1851	0.5248	0.3296	0.2605	0.3236	0.8799	0.1903	0.03	0.1658	0.1799	0.1853	0.1853	0.1861	0.8177	0.5598	<.0001	0.6382
Hypoplectrus nigricans	0.1514	0.258	0.4168	0.8918	0.3521	0.0779	0.047	0.3925	0.3169	0.4807	0.1609	0.4216	0.2898	0.5195	0.5196	0.2581	0.51	0.8955	0.8408	0.269	0.6868	0.3802	0.9396	0.5913	0.2727	0.5588	0.8024	0.8037	0.7414	0.8288	0.6944	0.6601	0.2222	0.552	0.2532	0.0717	0.1707	0.7893	0.3075	0.0502	0.0587	0.3231	0.1335	0.1335	0.0771	0.751	0.7178	0.0196	0.423
Hypoplectrus puella	0.2367	0.6017	0.1745	0.4357	0.4173	0.0378	0.2728	0.7458	0.7932	0.4763	0.2108	0.4897	0.2209	0.6308	0.6309	0.2851	0.6078	0.4536	0.7581	0.4464	0.6955	0.6043	0.7348	0.9548	0.1573	0.4092	0.9036	0.8975	0.8722	0.4482	0.6734	0.4429	0.3247	0.1269	0.2095	0.0347	0.0695	0.1199	0.4929	0.1182	0.0228	0.7673	0.0318	0.0318	0.0967	0.4362	0.8748	0.2147	0.6357
Hypoplectrus unicolor	0.3381	0.7087	0.5804	0.6362	0.5914	0.305	0.4851	0.6754	0.8304	0.6703	0.0622	0.6443	0.5659	0.7389	0.7388	0.2386	0.73	0.5629	0.5376	0.5733	0.6227	0.635	0.64	0.5562	0.554	0.521	0.868	0.8657	0.5916	0.5	0.6605	0.6963	0.1851	0.5248	0.3296	0.2605	0.3236	0.8799	0.1903	0.03	0.1658	0.1799	0.1853	0.1853	0.1861	0.8177	0.5598	<.0001	0.6382
Lucayablennius zingaro	0.3293	0.0001	0.5804	0.7754	0.5914	0.4233	0.0149	0.0036	0.0153	0.0314	0.9387	0.6443	0.5659	0.0752	0.0752	0.9022	0.709	0.7035	0.2146	0.5733	0.0843	0.6834	0.4785	0.9056	0.4732	0.8679	0.6697	0.6694	0.2505	0.5527	0.9418	0.8561	0.7783	0.8082	0.7127	0.3574	0.5211	0.9039	1	0.9115	0.5651	0.7266	0.862	0.862	0.4202	0.9771	0.9428	0.7681	0.4212
Lutjanus apodus	0.6664	0.7385	0.0469	0.0002	0.5914	0.417	0.5866	0.6754	0.5485	0.8341	0.3255	0.6443	0.5659	0.7358	0.7359	0.692	0.709	0.6852	0.0544	0.5733	0.8127	0.635	0.666	0.0172	0.6393	0.9807	0.2319	0.231	0.0148	0.0621	0.8017	0.0471	0.0437	0.9834	0.7127	0.8592	1	0.8799	0.6837	0.654	0.6411	0.0659	0.6523	0.6523	0.922	0.4428	0.5598	0.7681	0.3007
Lutjanus griseus	0.7325	0.7869	0.0648	0.001	0.5705	0.5024	0.5182	0.7843	0.4738	0.849	0.421	0.5899	0.7828	0.7652	0.7653	0.6769	0.6584	0.7641	0.063	0.7584	0.9519	0.8038	0.9535	0.0164	0.5959	0.9726	0.336	0.3349	0.0237	0.0445	0.7118	0.0625	0.0307	0.9574	0.7378	0.9567	0.9853	0.8209	0.7353	0.6808	0.7464	0.1027	0.75	0.75	0.8167	0.3861	0.5659	0.727	0.1778
Lutjanus jocu	0.8613	0.9012	0.535	0.9511	0.8363	0.9512	0.7395	0.8494	0.9404	0.1934	0.7082	0.6399	0.5193	0.8684	0.8685	0.7038	0.676	0.3489	0.5082	0.1214	0.3275	0.0351	0.6943	0.6807	0.4122	0.3723	0.7479	0.7533	0.675	0.4789	0.5781	0.9225	0.6772	0.7032	0.1455	0.2984	0.1819	0.6776	0.5339	0.9011	0.6453	0.6946	0.596	0.596	0.1478	0.4411	0.0179	0.7413	0.9863
Lutjanus synagris	0.6664	0.7385	0.0469	0.0002	0.5914	0.417	0.5866	0.6754	0.5485	0.8341	0.3255	0.6443	0.5659	0.7358	0.7359	0.692	0.709	0.6852	0.0544	0.5733	0.8127	0.635	0.666	0.0172	0.6393	0.9807	0.2319	0.231	0.0148	0.0621	0.8017	0.0471	0.0437	0.9834	0.7127	0.8592	1	0.8799	0.6837	0.654	0.6411	0.0659	0.6523	0.6523	0.922	0.4428	0.5598	0.7681	0.3007
Malacoctenus triangulatus	0.798	0.5868	0.4172	0.6286	0.567	0.3571	0.4251	0.5417	0.5451	0.7075	0.9526	0.5173	0.3989	0.7573	0.7572	0.9769	0.5872	0.1973	0.7745	0.8037	0.8535	0.6128	0.6785	0.7358	0.3069	0.0532	0.8541	0.8638	0.6866	0.3971	0.4786	0.4318	0.9916	0.065	0.4111	0.3185	0.2476	0.0194	0.8107	0.8724	0.3313	0.8728	0.2139	0.2139	0.5752	0.2524	0.7475	0.6688	0.5534
Microspathodon chrysurus	0.9272	0.5552	0.7275	0.5055	0.0046	0.1315	0.5209	0.6408	0.441	0.3618	0.7204	0.0497	0.2077	0.7734	0.7731	0.7934	0.5557	0.5977	0.3512	0.6974	0.2815	0.6354	0.8228	0.589	0.1672	0.5089	0.2393	0.2436	0.4793	0.5215	0.0191	0.2205	0.7389	0.0301	0.3829	0.122	0.0886	0.1715	0.7505	0.316	0.2713	0.3439	0.3909	0.3909	0.3988	0.6097	0.2803	0.6418	0.9671
Ocyurus chrysurus	0.4384	0.5995	0.4336	0.6223	0.5626	0.3365	0.6771	0.5555	0.741	0.9663	0.1296	0.5295	0.4156	0.7489	0.7488	0.3587	0.619	0.8684	0.726	0.9118	0.9005	0.7334	0.5094	0.7033	0.366	0.8303	0.7482	0.7484	0.4471	0.3135	0.5005	0.7359	0.1413	0.4259	0.1015	0.1171	0.115	0.7392	0.1108	0.0352	0.1238	0.1299	0.1226	0.1226	0.0411	0.5766	0.1276	0.0025	0.6882
Odontoscion dentex	0.6664	0.7385	0.0469	0.0002	0.5914	0.417	0.5866	0.6754	0.5485	0.8341	0.3255	0.6443	0.5659	0.7358	0.7359	0.692	0.709	0.6852	0.0544	0.5733	0.8127	0.635	0.666	0.0172	0.6393	0.9807	0.2319	0.231	0.0148	0.0621	0.8017	0.0471	0.0437	0.9834	0.7127	0.8592	1	0.8799	0.6837	0.654	0.6411	0.0659	0.6523	0.6523	0.922	0.4428	0.5598	0.7681	0.3007
Platybelone araglus	1	1	1	1	1	1	1	1	1	1	1	1	1	1	1	1	1	1	1	1	1	1	1	1	1	1	1	1	1	1	1	1	1	1	1	1	1	1	1	1	1	1	1	1	1	1	1	1	1
Pomacanthus arcuatus	0.7318	0.7602	0.6331	0.2175	0.4197	0.6944	0.4481	0.9882	0.4462	0.8074	0.5965	0.2982	0.6524	0.9576	0.9574	0.4797	0.3874	0.9236	0.3038	0.3181	0.4958	0.2694	0.308	0.08	0.2515	0.7744	0.8154	0.8173	0.4955	0.2668	0.2609	0.2667	0.2997	0.821	0.3314	0.7533	0.4827	0.5097	0.4811	0.3393	0.7129	0.1888	0.6729	0.6729	0.8098	0.1551	0.1751	0.7001	0.0399
Pseudupeneus maculatus	0.5834	0.6083	0.5867	0.9403	0.5093	0.3104	0.8832	0.4711	0.7891	0.7424	0.2994	0.4453	0.3161	0.816	0.8158	0.4261	0.5386	0.8933	0.921	0.7122	0.97	0.4924	0.4229	0.5609	0.2665	0.9834	0.8521	0.8539	0.6318	0.4198	0.4208	0.5575	0.2859	0.4094	0.0414	0.0803	0.0694	0.6621	0.0837	0.0447	0.1071	0.0572	0.0985	0.0985	0.0214	0.3982	0.0243	0.0279	0.8696
Pterois volitans	0.6664	0.7385	0.0469	0.0002	0.5914	0.417	0.5866	0.6754	0.5485	0.8341	0.3255	0.6443	0.5659	0.7358	0.7359	0.692	0.709	0.6852	0.0544	0.5733	0.8127	0.635	0.666	0.0172	0.6393	0.9807	0.2319	0.231	0.0148	0.0621	0.8017	0.0471	0.0437	0.9834	0.7127	0.8592	1	0.8799	0.6837	0.654	0.6411	0.0659	0.6523	0.6523	0.922	0.4428	0.5598	0.7681	0.3007
Scarus iseri	0.845	0.9012	0.2987	0.6077	0.4247	0.1264	0.8169	0.7983	0.8129	0.6074	0.7407	0.4147	0.2812	0.9742	0.974	0.7206	0.4829	0.2029	0.7881	0.7899	0.7986	0.993	0.7369	0.9001	0.1809	0.0921	0.9911	0.9818	0.8521	0.4372	0.4818	0.3215	0.8437	0.0392	0.32	0.1531	0.1488	0.0088	0.9407	0.5453	0.1267	0.983	0.082	0.082	0.3952	0.22	0.9039	0.9701	0.6807
Scomberomorus regalis	0.8336	0.9529	0.3305	0.0923	0.3235	0.0675	0.8805	0.4469	0.8131	0.8851	0.7699	0.3998	0.2887	0.9846	0.9844	0.2326	0.512	0.8539	0.3822	0.2986	0.5508	0.386	0.4594	0.0103	0.3173	0.9239	0.3766	0.3753	0.1763	0.3996	0.5288	0.0129	0.4766	0.4139	0.3105	0.2957	0.4322	0.4734	0.2995	0.0666	0.1044	0.0039	0.1029	0.1029	0.4742	0.2985	0.4856	0.1853	0.4804
Serranus tigrinus	0.3262	0.9423	0.8607	0.5234	0.7227	0.2147	0.7281	0.8222	0.638	0.9434	0.2819	0.591	0.5999	0.7256	0.7257	0.1757	0.3963	0.8605	0.6748	0.4497	0.7833	0.624	0.754	0.1022	0.3234	0.4774	0.3773	0.3796	0.6414	0.9641	0.8611	0.3519	0.8642	0.97	0.148	0.2568	0.355	0.9535	0.1321	0.0287	0.1143	0.0287	0.1224	0.1224	0.1578	0.3309	0.3408	0.0157	0.7351
Serranus tortugarum	0.3064	0.0013	0.4385	0.909	0.528	0.2592	0.027	0.0109	0.0332	0.0432	0.9675	0.5813	0.4622	0.0913	0.0914	0.8085	0.6268	0.5323	0.3216	0.4296	0.1181	0.5519	0.5354	0.8937	0.36	0.9045	0.6209	0.6192	0.2879	0.6867	0.9873	0.9701	0.7777	0.9064	0.6514	0.2621	0.419	0.7491	0.9276	0.8253	0.387	0.6744	0.6166	0.6166	0.395	0.8553	0.7917	0.8005	0.5007
Sparisoma aurofrenatum	0.7726	0.7297	0.3684	0.5205	0.0225	0.4419	0.5243	0.7996	0.6765	0.7656	0.86	0.1542	0.354	0.4729	0.4727	0.9458	0.9194	0.1639	0.5251	0.7079	0.5598	0.7865	0.9197	0.7546	0.6112	0.9565	0.1214	0.1229	0.5968	0.4526	0.0454	0.4603	0.6357	0.1213	0.8819	0.4519	0.4007	0.593	0.9152	0.5661	0.7119	0.4272	0.9049	0.9049	0.8078	0.7867	0.4789	0.637	0.7177
Sparisoma viride	0.4086	0.0805	0.1274	0.7142	0.5701	0.2321	0.2501	0.1028	0.1889	0.0346	0.9512	0.4887	0.3948	0.1877	0.1878	0.9108	0.431	0.1659	0.5478	0.7631	0.1112	0.9714	0.652	0.6264	0.1785	0.3636	0.7262	0.7209	0.6822	0.7446	0.8483	0.9313	0.7063	0.5148	0.3451	0.1398	0.1833	0.263	0.8718	0.8587	0.251	0.5534	0.3298	0.3298	0.2381	0.4258	0.9342	0.6476	0.8183
Stegastes adustus	0.2758	0.637	0.5379	0.4038	0.6008	0.7278	0.474	0.5924	0.6007	0.4805	0.1001	0.6077	0.966	0.9825	0.9824	0.2363	0.8142	0.7403	0.3225	0.4891	0.3801	0.4812	0.4944	0.7515	0.9397	0.4052	0.7232	0.7276	0.4116	0.3984	0.5442	0.8869	0.2436	0.7596	0.6105	0.638	0.7863	0.5739	0.1658	0.1237	0.4161	0.4419	0.419	0.419	0.3369	0.8472	0.8977	0.0029	0.4117
Stegastes diencaeus	0.9042	0.7087	0.5804	0.6362	0.5914	0.305	0.5866	0.6754	0.6229	0.8667	0.8875	0.6443	0.5659	0.7389	0.7388	0.8488	0.709	0.3997	0.5376	0.5733	0.8127	0.635	0.8547	0.8877	0.5049	0.1582	0.9935	0.9861	0.8947	0.6401	0.6585	0.3635	0.8371	0.088	0.8895	0.5902	0.595	0.0294	0.5371	0.9115	0.4157	0.6743	0.3063	0.3063	0.922	0.4428	0.4619	0.7681	0.5586
Stegastes partitus	0.2724	0.0008	0.6224	0.4056	0.4756	0.1139	0.054	0.0483	0.0133	0.0031	0.9021	0.4559	0.2491	0.0304	0.0305	0.5913	0.4454	0.2659	0.0524	0.5238	0.0903	0.7786	0.8234	0.5731	0.1461	0.8631	0.3101	0.3081	0.1041	0.5266	0.9498	0.5654	0.9796	0.9756	0.1995	0.0762	0.1762	0.755	0.5416	0.4472	0.147	0.6105	0.2962	0.2962	0.0973	0.4599	0.4929	0.9847	0.6801
Stegastes planifrons	0.8105	0.4251	0.1908	0.186	0.9563	0.672	0.7794	0.39	0.2436	0.3487	0.6218	0.9207	0.4765	0.3534	0.3534	0.8315	0.5558	0.9	0.0815	0.1878	0.18	0.2891	0.3784	0.3829	0.9115	0.5766	0.8844	0.8884	0.2141	0.0191	0.9663	0.6796	0.145	0.4128	0.9131	0.7123	0.9021	0.6953	0.6247	0.8414	0.5008	0.9361	0.3769	0.3769	0.712	0.999	0.457	0.2355	0.6639
Stegastes variabilis	0.3293	0.0001	0.5804	0.7754	0.5914	0.4233	0.0149	0.0036	0.0153	0.0314	0.9387	0.6443	0.5659	0.0752	0.0752	0.9022	0.709	0.7035	0.2146	0.5733	0.0843	0.6834	0.4785	0.9056	0.4732	0.8679	0.6697	0.6694	0.2505	0.5527	0.9418	0.8561	0.7783	0.8082	0.7127	0.3574	0.5211	0.9039	1	0.9115	0.5651	0.7266	0.862	0.862	0.4202	0.9771	0.9428	0.7681	0.4212
Synodus intermedius	0.3651	0.6936	0.2698	0.7627	0.4552	0.2725	0.3464	0.8053	0.6704	0.2076	0.3496	0.3845	0.2502	0.6905	0.6907	0.5488	0.4804	0.7101	0.6739	0.662	0.3837	0.4043	0.6838	0.9278	0.1696	0.9108	0.8255	0.8279	0.731	0.4013	0.4676	0.875	0.1477	0.4953	0.0257	0.0228	0.0221	0.7028	0.1318	0.1001	0.0936	0.2421	0.1311	0.1311	0.0013	0.4606	0.027	0.1134	0.5429
Thalassoma bifasciatum	0.6226	0.5125	0.3638	0.3792	0.2959	0.1135	0.4162	0.6465	0.9118	0.9436	0.5449	0.6155	0.0116	0.8847	0.8846	0.9494	0.9889	0.9273	0.6227	0.0477	0.4314	0.0672	0.0645	0.6542	0.9004	0.7107	0.5641	0.563	0.284	0.8769	0.7393	0.2524	0.7175	0.2595	0.8937	0.2994	0.6737	0.8357	0.8963	0.5473	0.2378	0.2309	0.3274	0.3274	0.5668	0.7095	0.9023	0.5312	0.234
Acanthurus coeruleus 2	0.3035	0.4487	0.0436	0.5103	0.3144	0.2663	0.6347	0.1996	0.2736	0.0572	0.4055	0.1934	0.6939	0.4835	0.4838	0.7182	0.2466	0.2781	0.7124	0.3952	0.0256	0.2078	0.2698	0.753	0.0289	0.124	0.5824	0.5897	0.8404	0.6306	0.2844	0.8127	0.6355	0.2145	0.1075	0.0819	0.0247	0.0421	0.8719	0.5161	0.2117	0.7162	0.2274	0.2274	0.1513	0.121	0.3739	0.944	0.5538
Anisotremus virginicus 2	0.5637	0.9136	0.0409	0.0161	0.6371	0.9948	0.3692	0.7282	0.6634	0.9735	0.4151	0.6867	0.8568	0.9571	0.957	0.9241	0.9295	0.8888	0.1196	0.5959	0.9017	0.6481	0.8364	0.0914	0.8399	0.8562	0.836	0.834	0.132	0.0469	0.589	0.2049	0.0489	0.8789	0.9721	0.717	0.8306	0.9733	0.8221	0.9754	0.7656	0.2537	0.7739	0.7739	0.5677	0.6056	0.4497	0.506	0.1882
Apogon townsendi 2	0.0923	0.4967	0.7895	0.7933	0.5036	0.6274	0.5076	0.4444	0.3761	0.9579	0.3903	0.42	0.2859	0.1116	0.1116	0.0591	0.502	0.5539	0.8227	0.5839	0.7667	0.3896	0.3908	0.1684	0.7833	0.4133	0.2877	0.2851	0.3277	0.1042	0.2666	0.3307	0.1064	0.4686	0.7803	0.7848	0.7459	0.7207	0.5269	0.5046	0.7934	0.7034	0.847	0.847	0.6122	0.7001	0.2778	0.8803	0.5431
Canthigaster rostrata 2	0.487	0.4801	0.9473	0.7124	0.0125	0.2937	0.8931	0.4956	0.5154	0.4398	0.6361	0.0418	0.2087	0.5565	0.5562	0.4296	0.3017	0.812	0.5814	0.9188	0.3913	0.9438	0.6663	0.7003	0.3503	0.6123	0.2969	0.3001	0.5656	0.9062	0.0333	0.5793	0.7692	0.0201	0.8596	0.3766	0.3543	0.1196	0.2358	0.7984	0.609	0.939	0.697	0.697	0.9418	0.7153	0.9869	0.5847	0.8135
Carangoides ruber 2	0.9107	0.502	0.4883	0.5849	0.9255	0.3847	0.4038	0.4075	0.411	0.9616	0.9794	0.8789	0.5551	0.8619	0.8619	0.8004	0.7908	0.1513	0.5593	0.8058	0.7612	0.9375	0.5602	0.8831	0.4883	0.0772	0.7695	0.7611	0.719	0.4415	0.8976	0.3814	0.7997	0.1687	0.6183	0.5144	0.4976	0.0438	0.833	0.8576	0.3623	0.7923	0.219	0.219	0.8018	0.3177	0.814	0.7301	0.5579
Cephalopholis cruentata 2	0.1725	0.8199	0.2454	0.6457	0.214	0.493	0.8341	0.9785	0.9357	0.5083	0.61	0.3955	0.9833	0.0958	0.0958	0.2003	0.9835	0.0086	0.9686	0.668	0.9151	0.84	0.6694	0.6617	0.4717	0.2997	0.0601	0.0588	0.9801	0.6498	0.1457	0.6572	0.6731	0.5952	0.283	0.45	0.5467	0.6104	0.2738	0.4183	0.2483	0.9694	0.1846	0.1846	0.2738	0.2726	0.9035	0.8786	0.8608
Chaetodon capistratus 2	0.0674	0.196	0.9665	0.6876	0.5556	0.4782	0.1019	0.4492	0.3073	0.1129	0.6487	0.4827	0.886	0.0071	0.0071	0.105	0.4519	0.2598	0.2223	0.828	0.2871	0.8225	0.7784	0.3183	0.4866	0.4096	0.2628	0.259	0.387	0.361	0.3004	0.5062	0.6552	0.3847	0.2878	0.307	0.3858	0.8007	0.0186	0.2127	0.3392	0.6048	0.4781	0.4781	0.1475	0.7312	0.3105	0.8345	0.4923
Chaetodon ocellatus 2	0.7425	0.3677	0.9019	0.401	0.0485	0.3382	0.8838	0.3086	0.2156	0.8051	0.8878	0.0634	0.5853	0.6911	0.6908	0.6963	0.1519	0.5592	0.5579	0.3776	0.6516	0.4539	0.2856	0.7251	0.4569	0.623	0.71	0.7082	0.2745	0.5183	0.1245	0.5701	0.8602	0.2471	0.8938	0.7518	0.8056	0.3686	0.1996	0.942	0.7323	0.8508	0.8391	0.8391	0.6798	0.6644	0.5293	0.9562	0.4171
Chaetodon striatus 2	0.5274	0.1269	0.3156	0.9641	0.575	0.6802	0.3302	0.0997	0.1271	0.0026	0.8981	0.4365	0.6126	0.2241	0.2243	0.8551	0.5057	0.4011	0.1847	0.2928	0.0088	0.1411	0.5109	0.6883	0.2146	0.5298	0.8308	0.8351	0.7577	0.9724	0.6033	0.7598	0.6693	0.9344	0.1882	0.1928	0.1364	0.7439	0.7037	0.9028	0.5719	0.9006	0.7229	0.7229	0.127	0.5003	0.1311	0.6009	0.8348
Coryphopterus glaucofraenum 2	0.4489	0.1356	0.5156	0.5949	0.1436	0.0027	0.3282	0.3903	0.2105	0.0641	0.863	0.1703	0.0669	0.3072	0.3074	0.4767	0.2788	0.1837	0.2609	0.4378	0.2723	0.7129	0.8934	0.5287	0.0285	0.2999	0.5546	0.5475	0.2432	0.8615	0.4173	0.1364	0.9803	0.1158	0.1082	0.0084	0.032	0.0591	0.6837	0.2371	0.012	0.4813	0.0283	0.0283	0.0922	0.169	0.5598	0.8137	0.9321
Coryphopterus personatus 2	0.3343	0.5535	0.8247	0.4546	0.1718	0.0065	0.3827	0.9886	0.467	0.3934	0.3497	0.1994	0.0894	0.6471	0.6473	0.1752	0.3178	0.6748	0.3822	0.4646	0.7672	0.7128	0.5394	0.1378	0.063	0.9716	0.605	0.6022	0.4222	0.9358	0.3676	0.1015	0.6473	0.2431	0.0283	0.0065	0.0281	0.3579	0.1089	0.0035	0.0021	0.0115	0.0078	0.0078	0.0146	0.2263	0.1474	0.0314	0.9699
Elacatinus xanthiprora 2	0.5391	0.5689	0.3943	0.4685	0.4087	0.0946	0.9119	0.5222	0.5918	0.6527	0.1477	0.4795	0.3756	0.612	0.6119	0.3035	0.5842	0.8524	0.3398	0.3851	0.5795	0.4668	0.6215	0.7392	0.3295	0.6127	0.9049	0.9088	0.6128	0.3791	0.5003	0.318	0.4274	0.0614	0.4025	0.1937	0.2369	0.1002	0.6434	0.1104	0.0729	0.5275	0.0495	0.0495	0.3784	0.4484	0.9135	0.0741	0.9334
Equetus punctatus 2	0.7823	0.7087	0.5804	0.9267	0.8833	0.9805	0.5866	0.6754	0.7772	0.2915	0.7168	0.6798	0.5659	0.9956	0.9956	0.6958	0.709	0.3775	0.6008	0.1052	0.4316	0.0303	0.64	0.6928	0.4654	0.3654	0.7144	0.7196	0.5904	0.4406	0.5754	0.9388	0.7027	0.6854	0.1648	0.3574	0.2163	0.6701	0.5371	0.9115	0.6943	0.6683	0.6126	0.6126	0.1861	0.4428	0.0186	0.7681	0.9183
Haemulon flavolineatum 2	0.4541	0.6922	0.5142	0.7159	0.9993	0.4253	0.8928	0.6191	0.3869	0.9748	0.5733	0.697	0.8055	0.578	0.5781	0.4639	0.2239	0.5003	0.916	0.2122	0.9064	0.3216	0.4522	0.331	0.4481	0.6737	0.2192	0.2214	0.5242	0.8679	0.8434	0.5994	0.5381	0.8557	0.667	0.8415	0.9528	0.613	0.8912	0.5544	0.4543	0.7375	0.407	0.407	0.944	0.248	0.5203	0.5797	0.2049
Haemulon macrostomum 2	0.9042	0.7087	0.5804	0.6362	0.5914	0.305	0.5866	0.6754	0.6229	0.8667	0.8875	0.6443	0.5659	0.7389	0.7388	0.8488	0.709	0.3997	0.5376	0.5733	0.8127	0.635	0.8547	0.8877	0.5049	0.1582	0.9935	0.9861	0.8947	0.6401	0.6585	0.3635	0.8371	0.088	0.8895	0.5902	0.595	0.0294	0.5371	0.9115	0.4157	0.6743	0.3063	0.3063	0.922	0.4428	0.4619	0.7681	0.5586
Haemulon plumierii 2	0.2856	0.8716	0.4355	0.8056	0.3492	0.1312	0.5135	0.8032	0.9159	0.8091	0.0801	0.3414	0.3494	0.9254	0.9252	0.2151	0.4538	0.9255	0.917	0.8639	0.9314	0.9377	0.697	0.4578	0.1853	0.8938	0.8528	0.8537	0.7379	0.5173	0.3864	0.471	0.2238	0.3032	0.067	0.0529	0.0601	0.5054	0.11	0.007	0.0421	0.09	0.0512	0.0512	0.031	0.4031	0.1747	0.0007	0.8547
Haemulon sciurus 2	0.817	0.5916	0.5826	0.9959	0.6906	0.985	0.4831	0.6891	0.8602	0.354	0.9184	0.4711	0.6803	0.8209	0.8208	0.7488	0.5308	0.5601	0.5937	0.0557	0.3853	0.0094	0.88	0.8451	0.3654	0.454	0.5268	0.5308	0.5626	0.4961	0.3492	0.9845	0.694	0.6072	0.1242	0.3576	0.1739	0.6084	0.5131	0.7676	0.6921	0.5174	0.6044	0.6044	0.192	0.3383	0.0051	0.9745	0.6623
Halichoeres bivittatus 2	0.803	0.8544	0.4501	0.5207	0.782	0.246	0.8829	0.707	0.6359	0.7807	0.8048	0.8499	0.4468	0.8852	0.8852	0.6353	0.9267	0.1941	0.6507	0.7417	0.9793	0.8377	0.6095	0.8606	0.4077	0.0604	0.8479	0.8383	0.8301	0.5535	0.8907	0.3659	0.9774	0.1396	0.5872	0.3367	0.3551	0.0437	0.9896	0.6875	0.2539	0.7335	0.1859	0.1859	0.6259	0.4238	0.7957	0.8353	0.8831
Holacanthus ciliaris 2	0.444	0.6051	0.6386	0.5145	0.2471	0.5318	0.8298	0.2341	0.0934	0.1617	0.5518	0.1264	0.6863	0.5908	0.5911	0.6178	0.2088	0.6617	0.2087	0.1439	0.0219	0.0789	0.036	0.3715	0.0457	0.2946	0.5768	0.5819	0.5298	0.3636	0.1498	0.4528	0.4386	0.57	0.2002	0.4224	0.1687	0.1558	0.7788	0.5251	0.5885	0.7437	0.6104	0.6104	0.5771	0.0597	0.1992	0.7732	0.041
Hypoplectrus nigricans 2	0.3039	0.164	0.5571	0.7818	0.3267	0.0437	0.0841	0.4103	0.2651	0.4702	0.4269	0.3755	0.1634	0.4888	0.489	0.3875	0.3646	0.9149	0.6532	0.0704	0.8564	0.1556	0.7915	0.5116	0.2954	0.4408	0.4718	0.4737	0.4326	0.9211	0.7593	0.5327	0.3874	0.5558	0.3165	0.088	0.264	0.7842	0.5298	0.1172	0.0517	0.2744	0.1177	0.1177	0.1308	0.6971	0.9289	0.0725	0.5071
Hypoplectrus puella 2	0.1692	0.5623	0.1645	0.3811	0.6313	0.0641	0.1975	0.7383	0.8158	0.4412	0.2028	0.708	0.2661	0.4731	0.4732	0.2352	0.7772	0.3914	0.7527	0.4667	0.7035	0.6117	0.6429	0.9796	0.2131	0.4271	0.7705	0.7649	0.8262	0.4324	0.9289	0.5346	0.309	0.2606	0.2087	0.0424	0.0893	0.2255	0.3551	0.1122	0.0294	0.8041	0.0423	0.0423	0.0713	0.5194	0.8404	0.207	0.4803
Lucayablennius zingaro 2	0.3293	0.0001	0.5804	0.7754	0.5914	0.4233	0.0149	0.0036	0.0153	0.0314	0.9387	0.6443	0.5659	0.0752	0.0752	0.9022	0.709	0.7035	0.2146	0.5733	0.0843	0.6834	0.4785	0.9056	0.4732	0.8679	0.6697	0.6694	0.2505	0.5527	0.9418	0.8561	0.7783	0.8082	0.7127	0.3574	0.5211	0.9039	1	0.9115	0.5651	0.7266	0.862	0.862	0.4202	0.9771	0.9428	0.7681	0.4212
Lutjanus griseus 2	0.8368	0.8635	0.1186	0.0088	0.5618	0.6505	0.4507	0.9466	0.4006	0.8766	0.5929	0.5367	0.8956	0.8165	0.8166	0.6715	0.6071	0.8848	0.0971	0.9643	0.8567	0.9489	0.6543	0.0257	0.5567	0.9108	0.5349	0.5337	0.0574	0.0386	0.6078	0.1107	0.0278	0.9245	0.7845	0.909	0.9663	0.7508	0.8192	0.7325	0.9062	0.197	0.8986	0.8986	0.6869	0.3379	0.5939	0.6852	0.0806
Malacoctenus triangulatus 2	0.7639	0.5689	0.3943	0.6694	0.6047	0.4598	0.4024	0.5222	0.5552	0.5198	0.8682	0.5037	0.3756	0.7983	0.7982	0.881	0.5694	0.1706	0.9463	0.4927	0.6875	0.3006	0.6215	0.6846	0.2761	0.0552	0.7874	0.7969	0.6118	0.339	0.442	0.5391	0.8953	0.1065	0.2577	0.2563	0.1669	0.0491	1	0.8665	0.3537	0.9951	0.2344	0.2344	0.3784	0.228	0.3678	0.654	0.6036
Microspathodon chrysurus 2	0.7087	0.4228	0.9862	0.4586	0.0059	0.0223	0.4683	0.6257	0.3388	0.1762	0.6727	0.0319	0.0852	0.9223	0.9226	0.5878	0.3423	0.9113	0.2446	0.9024	0.2372	0.7039	0.9895	0.4422	0.0397	0.4012	0.552	0.5592	0.3821	0.6638	0.035	0.1159	0.7493	0.0203	0.1184	0.0148	0.0128	0.0808	0.5343	0.1467	0.0579	0.1972	0.1073	0.1073	0.1262	0.2961	0.1612	0.5084	0.8917
Pomacanthus arcuatus 2	0.6945	0.6835	0.7891	0.2936	0.3892	0.619	0.4719	0.9042	0.5325	0.7162	0.517	0.2585	0.8133	0.9241	0.9239	0.4594	0.3497	0.9963	0.3288	0.2454	0.4706	0.1737	0.4334	0.1069	0.185	0.726	0.7561	0.7585	0.6468	0.4385	0.2148	0.2817	0.4802	0.7089	0.1797	0.5397	0.2997	0.4698	0.3362	0.2337	0.5511	0.1239	0.5067	0.5067	0.5279	0.1225	0.0629	0.53	0.0717
Pseudupeneus maculatus 2	0.6712	0.6387	0.7478	0.8121	0.4758	0.2834	0.9921	0.4344	0.8455	0.6613	0.4342	0.4076	0.2748	0.8639	0.8637	0.4448	0.503	0.7899	0.7058	0.6822	0.9391	0.4491	0.3867	0.4313	0.2314	0.9195	0.9586	0.9611	0.8191	0.5541	0.3948	0.4271	0.4411	0.4171	0.0297	0.0755	0.0654	0.6353	0.0773	0.0503	0.1022	0.0276	0.0918	0.0918	0.0222	0.3225	0.0093	0.0602	0.9962
Scarus iseri 2	0.5447	0.8693	0.1914	0.6667	0.4038	0.054	0.9223	0.9795	0.9242	0.3344	0.5748	0.3539	0.211	0.7202	0.7204	0.5055	0.3805	0.1165	0.9807	0.8311	0.5689	0.8761	0.7428	0.9257	0.0664	0.0955	0.8335	0.8241	0.9468	0.4412	0.4961	0.2771	0.7501	0.0603	0.1068	0.0378	0.0394	0.0108	0.6963	0.2883	0.0334	0.773	0.0204	0.0204	0.1271	0.1196	0.5672	0.7286	0.7361
Scomberomorus regalis 2	0.7822	0.8622	0.4988	0.202	0.2818	0.0358	0.8718	0.4087	0.9301	0.8294	0.6239	0.3599	0.2468	0.9007	0.9005	0.2047	0.4768	0.7929	0.5674	0.2567	0.5176	0.3456	0.4459	0.0264	0.2605	0.9207	0.4413	0.4391	0.2771	0.5697	0.475	0.0104	0.5991	0.2455	0.2867	0.2268	0.3445	0.2883	0.3414	0.0494	0.0596	0.0127	0.0519	0.0519	0.4363	0.2569	0.5857	0.1448	0.4863
Serranus tigrinus 2	0.4395	0.8388	0.5077	0.5918	0.7615	0.3656	0.8973	0.9374	0.4821	0.6743	0.4471	0.4529	0.661	0.704	0.7041	0.446	0.1587	0.6858	0.5849	0.6411	0.9455	0.9581	0.9935	0.2732	0.2703	0.3734	0.3986	0.4023	0.7666	0.7586	0.7843	0.6914	0.751	0.8856	0.0953	0.2734	0.3305	0.9773	0.2968	0.1315	0.1885	0.0785	0.1861	0.1861	0.1221	0.228	0.2362	0.0741	0.5736
Serranus tortugarum 2	0.2315	0.0201	0.2591	0.8571	0.6628	0.1685	0.0558	0.0577	0.1071	0.1132	0.7491	0.6709	0.4347	0.111	0.111	0.6165	0.5724	0.3616	0.5842	0.2494	0.2743	0.371	0.6968	0.9238	0.3187	0.8322	0.4462	0.4446	0.4368	0.9784	0.8408	0.8742	0.7103	0.7985	0.558	0.2099	0.3809	0.5695	1	0.6414	0.2269	0.7029	0.3607	0.3607	0.3272	0.6974	0.6452	0.9428	0.5623
Sparisoma aurofrenatum 2	0.6006	0.9172	0.1314	0.406	0.1055	0.6185	0.5559	0.8282	0.9827	0.7863	0.9993	0.3856	0.3665	0.3626	0.3625	0.9396	0.7937	0.0675	0.6486	0.9446	0.8789	0.7916	0.6675	0.6407	0.9292	0.5869	0.2596	0.2597	0.5731	0.4283	0.1805	0.5107	0.6503	0.3157	0.8216	0.7336	0.7922	0.8948	0.8272	0.5978	0.895	0.2732	0.913	0.913	0.9878	0.4436	0.6504	0.4507	0.4731
Sparisoma viride 2	0.3932	0.2337	0.023	0.3449	0.7191	0.3812	0.3609	0.1639	0.3589	0.089	0.7191	0.548	0.5463	0.3246	0.3248	0.9818	0.3987	0.2007	0.9341	0.9435	0.1541	0.7775	0.6012	0.3806	0.2212	0.4083	0.926	0.9216	0.8268	0.3678	0.8593	0.7513	0.43	0.5256	0.3291	0.1776	0.1858	0.2787	0.8417	0.8872	0.31	0.4152	0.3522	0.3522	0.2175	0.4356	0.9237	0.8243	0.824
Stegastes adustus 2	0.3109	0.7104	0.5105	0.2439	0.3261	0.813	0.3649	0.7401	0.5623	0.5126	0.1684	0.3302	0.7872	0.8904	0.8903	0.4088	0.5255	0.6367	0.2627	0.6912	0.4529	0.6222	0.5414	0.8605	0.5909	0.3255	0.8303	0.836	0.2673	0.3458	0.3142	0.4408	0.172	0.407	0.8826	0.934	0.9296	0.2489	0.2215	0.3413	0.7948	0.8025	0.8279	0.8279	0.4641	0.4899	0.9973	0.0351	0.1965
Stegastes diencaeus 2	0.9042	0.7087	0.5804	0.6362	0.5914	0.305	0.5866	0.6754	0.6229	0.8667	0.8875	0.6443	0.5659	0.7389	0.7388	0.8488	0.709	0.3997	0.5376	0.5733	0.8127	0.635	0.8547	0.8877	0.5049	0.1582	0.9935	0.9861	0.8947	0.6401	0.6585	0.3635	0.8371	0.088	0.8895	0.5902	0.595	0.0294	0.5371	0.9115	0.4157	0.6743	0.3063	0.3063	0.922	0.4428	0.4619	0.7681	0.5586
Stegastes partitus 2	0.1214	0.0307	0.5714	0.3957	0.5534	0.0394	0.114	0.1894	0.0436	0.0071	0.7487	0.4901	0.2512	0.0202	0.0202	0.2258	0.4368	0.1254	0.0622	0.6314	0.1337	0.9306	0.9972	0.2574	0.0471	0.5946	0.2019	0.1991	0.14	0.5629	0.9801	0.272	0.8615	0.8897	0.0384	0.0178	0.0565	0.5292	0.1652	0.1194	0.0275	0.2896	0.0743	0.0743	0.0163	0.192	0.2275	0.6403	0.9151
Stegastes planifrons 2	0.7968	0.4358	0.1276	0.1226	0.8557	0.8152	0.7957	0.44	0.2358	0.4071	0.6598	0.9842	0.5246	0.3739	0.374	0.7164	0.576	0.8722	0.0696	0.2676	0.2283	0.3955	0.4024	0.2498	0.8555	0.5678	0.942	0.9463	0.1441	0.0061	0.9092	0.493	0.0992	0.4948	0.9171	0.7475	0.916	0.7889	0.5925	0.9644	0.5902	0.7978	0.4572	0.4572	0.6809	0.9401	0.498	0.2912	0.5873
Synodus intermedius 2	0.3118	0.4817	0.2534	0.8026	0.4273	0.2401	0.2278	0.5968	0.4959	0.1295	0.3777	0.3673	0.2338	0.5466	0.5467	0.5538	0.4652	0.6821	0.5698	0.7333	0.2846	0.461	0.7693	0.9438	0.152	0.9326	0.8786	0.881	0.8581	0.4743	0.4936	0.8999	0.1535	0.5369	0.0289	0.0174	0.0207	0.7272	0.1522	0.1139	0.0886	0.2894	0.1426	0.1426	0.0009	0.4827	0.04	0.1478	0.4859
Thalassoma bifasciatum 2	0.6627	0.5357	0.4357	0.2587	0.1478	0.0371	0.6097	0.6906	0.9083	0.9008	0.6364	0.336	0.0113	0.8418	0.8417	0.8469	0.6127	0.9425	0.5244	0.0397	0.5132	0.0774	0.1655	0.4286	0.5732	0.8198	0.5323	0.5307	0.191	0.7877	0.4843	0.11	0.9224	0.1299	0.6955	0.2146	0.508	0.4787	0.9808	0.4226	0.1307	0.1491	0.1779	0.1779	0.5505	0.875	0.9456	0.498	0.6151
[truncated: 121 more columns]

## Sheet: Corr Prob Env Fish
Correlation Probability
	Hard coral reef	Hard coral bleached	Recently killed coral	Anemone	Soft coral reef	Sponges	Worms	Zoanthid	Rubble	Sand reef	Rock	Calcifying algae reef	Macroalgae reef	Soft Substrate	Hard substrate	Thalassia	Syringodium	Sand seagrass	Hard coral seagrass	Soft coral seagrass	Sponge seagrass	Macroalgae seagrass	Calcifying algae seagrass	Seagrass Biomass (g/m2)	Distance Reef-Mangrove (m)	Temp °C reef	Sal psu reef	TDS mg/L reef	ODO mg/L reef	pH reef	Turbidity FNU reef	Chlorophyll µg/L reef	BGA-PE µg/L reef	fDOM RFU reef	Reef Biodiversity M1	Reef Biodiversity M2	Mangrove M1	Mangrove M2	Seagrass M1	Seagrass M2	Trophic level (Fish Base)	Trophic level Avg all species	Vulnerability (Fish Base)	Vulnerability (Fish Base)/10	Resilience high (No of species, Fish Base)	Resilience medium	Resilience low	Resilience very low	Resilience high %
Hard coral reef	<.0001	0.3977	0.3576	0.6196	0.7318	0.3847	0.1212	0.2305	0.2308	0.3455	0.0223	0.7434	0.4974	0.0437	0.0437	0.0063	0.7648	0.4935	0.8363	0.7835	0.2114	0.8396	0.3475	0.3204	0.2454	0.3403	0.6544	0.6494	0.8636	0.5343	0.5512	0.5779	0.8675	0.6704	0.3028	0.3486	0.2932	0.6204	0.052	0.0578	0.2601	0.9898	0.343	0.343	0.2606	0.4296	0.7437	0.3381	0.9377
Hard coral bleached	0.3977	<.0001	0.922	0.3609	0.494	0.301	0.0332	0.0099	0.0047	0.0242	0.7424	0.5572	0.4639	0.0551	0.0552	0.8199	0.6359	0.6244	0.0649	0.4726	0.1035	0.592	0.5576	0.7008	0.3953	0.8631	0.4602	0.4596	0.0661	0.288	0.995	0.7902	0.8643	0.8042	0.6404	0.3313	0.522	0.936	0.9143	0.8185	0.4815	0.9398	0.7694	0.7694	0.4378	0.8647	0.9353	0.7087	0.6007
Recently killed coral	0.3576	0.922	<.0001	0.0779	0.9709	0.7784	0.8279	0.4276	0.7479	0.4699	0.2485	0.5841	0.9201	0.8069	0.807	0.9533	0.2552	0.4472	0.433	0.7131	0.3679	0.4594	0.3908	0.2974	0.3086	0.7466	0.7371	0.7371	0.1884	0.0702	0.7782	0.3759	0.188	0.6697	0.2873	0.3676	0.259	0.3949	0.9154	0.7487	0.4749	0.4593	0.4171	0.4171	0.2541	0.3569	0.8049	0.5804	0.8106
Anemone	0.6196	0.3609	0.0779	<.0001	0.4157	0.3531	0.8719	0.9623	0.2949	0.4557	0.189	0.4593	0.3483	0.5861	0.5862	0.9317	0.548	0.6579	0.0076	0.5414	0.8747	0.6719	0.7072	0.0565	0.5442	0.8497	0.2471	0.2464	0.0025	0.0694	0.6796	0.0959	0.1042	0.991	0.6229	0.6619	0.8458	0.9623	0.8086	0.7778	0.5946	0.078	0.6772	0.6772	0.8749	0.49	0.4531	0.6362	0.4741
Soft coral reef	0.7318	0.494	0.9709	0.4157	<.0001	0.0993	0.7717	0.5637	0.336	0.3916	0.9624	0.0006	0.1019	0.5257	0.5253	0.7629	0.0929	0.6248	0.3587	0.8748	0.3913	0.883	0.7162	0.7404	0.1229	0.9728	0.3404	0.3422	0.4448	0.8621	0.001	0.3529	0.5758	0.0126	0.3405	0.1134	0.1074	0.1574	0.7014	0.4982	0.2374	0.2853	0.3219	0.3219	0.4113	0.432	0.393	0.5914	0.6935
Sponges	0.3847	0.301	0.7784	0.3531	0.0993	<.0001	0.4363	0.7117	0.278	0.2073	0.5971	0.1258	0.0576	0.4484	0.4487	0.2216	0.2246	0.3137	0.2503	0.317	0.5404	0.559	0.7314	0.1482	0.0164	0.5	0.454	0.4487	0.1814	0.7173	0.3325	0.0255	0.9327	0.1025	0.0495	0.0036	0.0229	0.0729	0.3591	0.0369	0.0003	0.0937	0.0025	0.0025	0.0587	0.1022	0.385	0.305	0.7362
Worms	0.1212	0.0332	0.8279	0.8719	0.7717	0.4363	<.0001	0.0776	0.1603	0.2592	0.4318	0.9291	0.6861	0.1431	0.1432	0.3779	0.6073	0.7626	0.5979	0.5617	0.3162	0.4851	0.8253	0.9165	0.7608	0.8027	0.9062	0.9057	0.528	0.5457	0.7251	0.9506	0.4689	0.7804	0.8601	0.3868	0.5756	0.6452	0.392	0.3948	0.5034	0.9385	0.8244	0.8244	0.377	0.5276	0.9051	0.4851	0.0953
Zoanthid	0.2305	0.0099	0.4276	0.9623	0.5637	0.7117	0.0776	<.0001	0.0037	0.0606	0.706	0.525	0.7942	0.1356	0.1356	0.8704	0.5953	0.9437	0.3163	0.8751	0.0145	0.8217	0.0509	0.902	0.4016	0.9986	0.8757	0.8758	0.4287	0.4402	0.809	0.6884	0.9329	0.7512	0.8021	0.6122	0.581	0.932	0.8486	1	0.8807	0.4587	0.8471	0.8471	0.7017	0.8387	0.9191	0.6754	0.9496
Rubble	0.2308	0.0047	0.7479	0.2949	0.336	0.278	0.1603	0.0037	<.0001	0.0176	0.8556	0.2772	0.8306	0.0729	0.073	0.5808	0.314	0.6084	0.0388	0.9448	0.0177	0.8789	0.1338	0.3813	0.123	0.9159	0.6606	0.6591	0.0792	0.1841	0.6182	0.6005	0.6053	0.9069	0.3526	0.2943	0.3095	0.6829	0.7793	0.5571	0.4205	0.7735	0.641	0.641	0.4058	0.3482	0.5986	0.8304	0.63
Sand reef	0.3455	0.0242	0.4699	0.4557	0.3916	0.2073	0.2592	0.0606	0.0176	<.0001	0.8864	0.2862	0.3964	0.0637	0.0638	0.7353	0.311	0.1732	0.0312	0.7213	0.0075	0.4316	0.5259	0.6666	0.0503	0.4336	0.6272	0.6218	0.2181	0.587	0.602	0.5901	0.8521	0.8044	0.0824	0.066	0.0673	0.4474	0.5597	0.5455	0.2096	0.6997	0.3284	0.3284	0.0782	0.2013	0.1629	0.6703	0.8477
Rock	0.0223	0.7424	0.2485	0.189	0.9624	0.5971	0.4318	0.706	0.8556	0.8864	<.0001	0.9836	0.4245	0.7605	0.7605	0.0512	0.8696	0.7682	0.3557	0.5939	0.6048	0.7036	0.356	0.6692	0.4152	0.5506	0.5064	0.509	0.3536	0.8474	0.8842	0.8448	0.5106	0.7554	0.4792	0.5172	0.3434	0.4763	0.1768	0.0619	0.4078	0.9817	0.4234	0.4234	0.4556	0.6208	0.8535	0.0622	0.8785
Calcifying algae reef	0.7434	0.5572	0.5841	0.4593	0.0006	0.1258	0.9291	0.525	0.2772	0.2862	0.9836	<.0001	0.1471	0.5757	0.5753	0.6608	0.0076	0.9506	0.3393	0.9974	0.3029	0.6294	0.5436	0.7954	0.0523	0.953	0.464	0.4652	0.5535	0.8662	0.0008	0.4725	0.5986	0.0282	0.1678	0.0933	0.0685	0.1168	0.6258	0.5535	0.2084	0.2917	0.2426	0.2426	0.2952	0.1763	0.2625	0.6443	0.371
Macroalgae reef	0.4974	0.4639	0.9201	0.3483	0.1019	0.0576	0.6861	0.7942	0.8306	0.3964	0.4245	0.1471	<.0001	0.8367	0.8365	0.6961	0.2572	0.6571	0.3528	0.2093	0.8893	0.4657	0.1299	0.8415	0.3522	0.7662	0.6564	0.655	0.3754	0.6439	0.2855	0.3432	0.4764	0.1061	0.2607	0.0522	0.1885	0.5098	0.9868	0.5377	0.0867	0.1149	0.1191	0.1191	0.139	0.6475	0.3893	0.5659	0.5353
Soft Substrate	0.0437	0.0551	0.8069	0.5861	0.5257	0.4484	0.1431	0.1356	0.0729	0.0637	0.7605	0.5757	0.8367	<.0001	<.0001	0.1339	0.7808	0.1101	0.1592	0.8947	0.1628	0.9418	0.6533	0.2867	0.3709	0.3977	0.1074	0.1055	0.1853	0.2245	0.2386	0.5194	0.3079	0.2825	0.4041	0.4579	0.5535	0.9863	0.1819	0.4201	0.4108	0.9796	0.5473	0.5473	0.3545	0.4744	0.7487	0.7389	0.9779
Hard substrate	0.0437	0.0552	0.807	0.5862	0.5253	0.4487	0.1432	0.1356	0.073	0.0638	0.7605	0.5753	0.8365	<.0001	<.0001	0.1339	0.7804	0.1101	0.1593	0.8947	0.163	0.9417	0.6534	0.2868	0.3712	0.3977	0.1074	0.1054	0.1854	0.2245	0.2383	0.5195	0.3078	0.2823	0.4044	0.4582	0.5538	0.9866	0.1819	0.4202	0.411	0.9798	0.5475	0.5475	0.3547	0.4747	0.7489	0.7388	0.9777
Thalassia	0.0063	0.8199	0.9533	0.9317	0.7629	0.2216	0.3779	0.8704	0.5808	0.7353	0.0512	0.6608	0.6961	0.1339	0.1339	<.0001	0.5856	0.461	0.7918	0.9811	0.6798	0.8737	0.8576	0.0464	0.2855	0.2333	0.4253	0.4196	0.6151	0.3213	0.5536	0.1152	0.4558	0.892	0.3049	0.3663	0.3521	0.4723	0.009	0.0092	0.1551	0.452	0.1769	0.1769	0.352	0.3465	0.6808	0.2386	0.7377
Syringodium	0.7648	0.6359	0.2552	0.548	0.0929	0.2246	0.6073	0.5953	0.314	0.311	0.8696	0.0076	0.2572	0.7808	0.7804	0.5856	<.0001	0.5244	0.4315	0.7632	0.4682	0.732	0.5711	0.8668	0.0688	0.7421	0.9434	0.9451	0.6707	0.509	0.0754	0.7214	0.7187	0.2079	0.1161	0.1646	0.1534	0.2094	0.5277	0.7303	0.2254	0.3676	0.1987	0.1987	0.2687	0.0659	0.3533	0.73	0.1943
Sand seagrass	0.4935	0.6244	0.4472	0.6579	0.6248	0.3137	0.7626	0.9437	0.6084	0.1732	0.7682	0.9506	0.6571	0.1101	0.1101	0.461	0.5244	<.0001	0.3595	0.8851	0.5527	0.7894	0.7658	0.4639	0.1821	0.1502	0.057	0.0551	0.4908	0.9697	0.5312	0.3262	0.2951	0.9409	0.1244	0.2821	0.3209	0.287	0.4881	0.6018	0.1941	0.7346	0.1332	0.1332	0.2435	0.0542	0.4769	0.5629	0.3753
Hard coral seagrass	0.8363	0.0649	0.433	0.0076	0.3587	0.2503	0.5979	0.3163	0.0388	0.0312	0.3557	0.3393	0.3528	0.1592	0.1593	0.7918	0.4315	0.3595	<.0001	0.957	0.1715	0.8094	0.8725	0.1374	0.1945	0.779	0.3277	0.325	0.0048	0.0928	0.6289	0.1911	0.2246	0.9753	0.256	0.2766	0.3504	0.7801	0.5756	0.6338	0.3866	0.1981	0.5307	0.5307	0.3688	0.2976	0.1859	0.5376	0.589
Soft coral seagrass	0.7835	0.4726	0.7131	0.5414	0.8748	0.317	0.5617	0.8751	0.9448	0.7213	0.5939	0.9974	0.2093	0.8947	0.8947	0.9811	0.7632	0.8851	0.957	<.0001	0.2133	0.0003	0.25	0.7173	0.7943	0.2523	0.1428	0.1452	0.3372	0.9512	0.6115	0.6236	0.9185	0.8977	0.7591	0.7882	0.6895	0.7747	0.7005	0.8665	0.4679	0.5477	0.526	0.526	0.9852	0.735	0.2494	0.5733	0.4771
Sponge seagrass	0.2114	0.1035	0.3679	0.8747	0.3913	0.5404	0.3162	0.0145	0.0177	0.0075	0.6048	0.3029	0.8893	0.1628	0.163	0.6798	0.4682	0.5527	0.1715	0.2133	<.0001	0.1372	0.0643	0.8568	0.0864	0.3047	0.6451	0.6509	0.5468	0.4736	0.4226	0.8865	0.8804	0.8312	0.247	0.2681	0.1325	0.384	0.7	0.6599	0.5722	0.7774	0.739	0.739	0.3191	0.2906	0.2867	0.6227	0.585
Macroalgae seagrass	0.8396	0.592	0.4594	0.6719	0.883	0.559	0.4851	0.8217	0.8789	0.4316	0.7036	0.6294	0.4657	0.9418	0.9417	0.8737	0.732	0.7894	0.8094	0.0003	0.1372	<.0001	0.2888	0.7438	0.4469	0.2672	0.2322	0.2353	0.4148	0.8175	0.4078	0.7128	0.9783	0.8819	0.3731	0.8169	0.3719	0.5565	0.7243	0.9782	0.792	0.7929	0.8784	0.8784	0.6236	0.3875	0.0912	0.635	0.3417
Calcifying algae seagrass	0.3475	0.5576	0.3908	0.7072	0.7162	0.7314	0.8253	0.0509	0.1338	0.5259	0.356	0.5436	0.1299	0.6533	0.6534	0.8576	0.5711	0.7658	0.8725	0.25	0.0643	0.2888	<.0001	0.9411	0.4964	0.7048	0.3523	0.3527	0.9549	0.5287	0.5492	0.6368	0.7528	0.8468	0.9753	0.7757	0.852	0.6021	0.6457	0.862	0.6268	0.2833	0.5656	0.5656	0.6679	0.5739	0.8422	0.64	0.2247
Seagrass Biomass (g/m2)	0.3204	0.7008	0.2974	0.0565	0.7404	0.1482	0.9165	0.902	0.3813	0.6666	0.6692	0.7954	0.8415	0.2867	0.2868	0.0464	0.8668	0.4639	0.1374	0.7173	0.8568	0.7438	0.9411	<.0001	0.2415	0.5458	0.1978	0.195	0.0609	0.0594	0.9971	0.0064	0.0781	0.9923	0.2876	0.4276	0.4816	0.5313	0.0976	0.0663	0.1929	0.0521	0.2107	0.2107	0.5416	0.1849	0.4199	0.5562	0.2827
Distance Reef-Mangrove (m)	0.2454	0.3953	0.3086	0.5442	0.1229	0.0164	0.7608	0.4016	0.123	0.0503	0.4152	0.0523	0.3522	0.3709	0.3712	0.2855	0.0688	0.1821	0.1945	0.7943	0.0864	0.4469	0.4964	0.2415	<.0001	0.2348	0.8051	0.7975	0.4094	0.819	0.1719	0.1227	0.8396	0.1685	0.0028	0.0058	0.0011	0.0206	0.3756	0.0742	0.0112	0.2479	0.0145	0.0145	0.0346	0.0033	0.1009	0.554	0.2126
Temp °C reef	0.3403	0.8631	0.7466	0.8497	0.9728	0.5	0.8027	0.9986	0.9159	0.4336	0.5506	0.953	0.7662	0.3977	0.3977	0.2333	0.7421	0.1502	0.779	0.2523	0.3047	0.2672	0.7048	0.5458	0.2348	<.0001	0.999	0.9874	0.935	0.6064	0.9508	0.2177	0.2986	0.5135	0.3926	0.484	0.2795	0.0569	0.3925	0.4889	0.4632	0.7875	0.3868	0.3868	0.6606	0.1946	0.5598	0.521	0.3529
Sal psu reef	0.6544	0.4602	0.7371	0.2471	0.3404	0.454	0.9062	0.8757	0.6606	0.6272	0.5064	0.464	0.6564	0.1074	0.1074	0.4253	0.9434	0.057	0.3277	0.1428	0.6451	0.2322	0.3523	0.1978	0.8051	0.999	<.0001	<.0001	0.1552	0.5845	0.1243	0.3438	0.197	0.3234	0.5906	0.7453	0.8961	0.7939	0.4701	0.6652	0.4052	0.4247	0.3834	0.3834	0.6188	0.4895	0.9418	0.868	0.8548
TDS mg/L reef	0.6494	0.4596	0.7371	0.2464	0.3422	0.4487	0.9057	0.8758	0.6591	0.6218	0.509	0.4652	0.655	0.1055	0.1054	0.4196	0.9451	0.0551	0.325	0.1452	0.6509	0.2353	0.3527	0.195	0.7975	0.9874	<.0001	<.0001	0.1539	0.5806	0.1252	0.3373	0.1941	0.3274	0.5852	0.739	0.904	0.8038	0.465	0.6597	0.4002	0.4238	0.3784	0.3784	0.6148	0.4837	0.9467	0.8657	0.8511
ODO mg/L reef	0.8636	0.0661	0.1884	0.0025	0.4448	0.1814	0.528	0.4287	0.0792	0.2181	0.3536	0.5535	0.3754	0.1853	0.1854	0.6151	0.6707	0.4908	0.0048	0.3372	0.5468	0.4148	0.9549	0.0609	0.4094	0.935	0.1552	0.1539	<.0001	0.026	0.9195	0.084	0.104	0.9536	0.6508	0.5015	0.7388	0.8292	0.7471	0.6526	0.4221	0.2402	0.576	0.576	0.784	0.516	0.7738	0.5916	0.6795
pH reef	0.5343	0.288	0.0702	0.0694	0.8621	0.7173	0.5457	0.4402	0.1841	0.587	0.8474	0.8662	0.6439	0.2245	0.2245	0.3213	0.509	0.9697	0.0928	0.9512	0.4736	0.8175	0.5287	0.0594	0.819	0.6064	0.5845	0.5806	0.026	<.0001	0.8236	0.178	0.0328	0.5538	0.7929	0.8195	0.8099	0.9402	0.5238	0.7127	0.9267	0.6695	0.7511	0.7511	0.5911	0.9186	0.9793	0.5	0.6194
Turbidity FNU reef	0.5512	0.995	0.7782	0.6796	0.001	0.3325	0.7251	0.809	0.6182	0.602	0.8842	0.0008	0.2855	0.2386	0.2383	0.5536	0.0754	0.5312	0.6289	0.6115	0.4226	0.4078	0.5492	0.9971	0.1719	0.9508	0.1243	0.1252	0.9195	0.8236	<.0001	0.6001	0.4971	0.0134	0.3616	0.2448	0.1409	0.1434	0.5782	0.6858	0.4633	0.4187	0.4869	0.4869	0.5431	0.3801	0.2839	0.6605	0.4349
Chlorophyll µg/L reef	0.5779	0.7902	0.3759	0.0959	0.3529	0.0255	0.9506	0.6884	0.6005	0.5901	0.8448	0.4725	0.3432	0.5194	0.5195	0.1152	0.7214	0.3262	0.1911	0.6236	0.8865	0.7128	0.6368	0.0064	0.1227	0.2177	0.3438	0.3373	0.084	0.178	0.6001	<.0001	0.1541	0.3023	0.2178	0.1812	0.2289	0.1177	0.2314	0.081	0.0637	0.0655	0.0627	0.0627	0.437	0.1237	0.4274	0.6963	0.3306
BGA-PE µg/L reef	0.8675	0.8643	0.188	0.1042	0.5758	0.9327	0.4689	0.9329	0.6053	0.8521	0.5106	0.5986	0.4764	0.3079	0.3078	0.4558	0.7187	0.2951	0.2246	0.9185	0.8804	0.9783	0.7528	0.0781	0.8396	0.2986	0.197	0.1941	0.104	0.0328	0.4971	0.1541	<.0001	0.4665	0.9046	0.5795	0.6222	0.749	0.7536	0.9498	0.8624	0.8075	0.9315	0.9315	0.4396	0.4234	0.907	0.1851	0.1329
fDOM RFU reef	0.6704	0.8042	0.6697	0.991	0.0126	0.1025	0.7804	0.7512	0.9069	0.8044	0.7554	0.0282	0.1061	0.2825	0.2823	0.892	0.2079	0.9409	0.9753	0.8977	0.8312	0.8819	0.8468	0.9923	0.1685	0.5135	0.3234	0.3274	0.9536	0.5538	0.0134	0.3023	0.4665	<.0001	0.3425	0.118	0.0965	0.0231	0.7385	0.4584	0.1661	0.4613	0.1496	0.1496	0.4301	0.3612	0.5533	0.5248	0.6824
Reef Biodiversity M1	0.3028	0.6404	0.2873	0.6229	0.3405	0.0495	0.8601	0.8021	0.3526	0.0824	0.4792	0.1678	0.2607	0.4041	0.4044	0.3049	0.1161	0.1244	0.256	0.7591	0.247	0.3731	0.9753	0.2876	0.0028	0.3926	0.5906	0.5852	0.6508	0.7929	0.3616	0.2178	0.9046	0.3425	<.0001	0.0033	0.0013	0.1398	0.1505	0.0464	0.0077	0.1011	0.0066	0.0066	0.0013	0.0102	0.0132	0.3296	0.4236
Reef Biodiversity M2	0.3486	0.3313	0.3676	0.6619	0.1134	0.0036	0.3868	0.6122	0.2943	0.066	0.5172	0.0933	0.0522	0.4579	0.4582	0.3663	0.1646	0.2821	0.2766	0.7882	0.2681	0.8169	0.7757	0.4276	0.0058	0.484	0.7453	0.739	0.5015	0.8195	0.2448	0.1812	0.5795	0.118	0.0033	<.0001	0.0003	0.1128	0.2569	0.0432	0.0006	0.1286	0.0034	0.0034	0.0011	0.0913	0.0844	0.2605	0.9322
Mangrove M1	0.2932	0.522	0.259	0.8458	0.1074	0.0229	0.5756	0.581	0.3095	0.0673	0.3434	0.0685	0.1885	0.5535	0.5538	0.3521	0.1534	0.3209	0.3504	0.6895	0.1325	0.3719	0.852	0.4816	0.0011	0.2795	0.8961	0.904	0.7388	0.8099	0.1409	0.2289	0.6222	0.0965	0.0013	0.0003	<.0001	0.0501	0.2542	0.0489	0.0069	0.2185	0.0116	0.0116	0.0038	0.0436	0.0393	0.3236	0.6254
Mangrove M2	0.6204	0.936	0.3949	0.9623	0.1574	0.0729	0.6452	0.932	0.6829	0.4474	0.4763	0.1168	0.5098	0.9863	0.9866	0.4723	0.2094	0.287	0.7801	0.7747	0.384	0.5565	0.6021	0.5313	0.0206	0.0569	0.7939	0.8038	0.8292	0.9402	0.1434	0.1177	0.749	0.0231	0.1398	0.1128	0.0501	<.0001	0.8843	0.2912	0.0942	0.6768	0.0604	0.0604	0.3836	0.0274	0.5181	0.8799	0.136
Seagrass M1	0.052	0.9143	0.9154	0.8086	0.7014	0.3591	0.392	0.8486	0.7793	0.5597	0.1768	0.6258	0.9868	0.1819	0.1819	0.009	0.5277	0.4881	0.5756	0.7005	0.7	0.7243	0.6457	0.0976	0.3756	0.3925	0.4701	0.465	0.7471	0.5238	0.5782	0.2314	0.7536	0.7385	0.1505	0.2569	0.2542	0.8843	<.0001	0.0119	0.1762	0.196	0.2076	0.2076	0.1145	0.4788	0.161	0.1903	0.8643
Seagrass M2	0.0578	0.8185	0.7487	0.7778	0.4982	0.0369	0.3948	1	0.5571	0.5455	0.0619	0.5535	0.5377	0.4201	0.4202	0.0092	0.7303	0.6018	0.6338	0.8665	0.6599	0.9782	0.862	0.0663	0.0742	0.4889	0.6652	0.6597	0.6526	0.7127	0.6858	0.081	0.9498	0.4584	0.0464	0.0432	0.0489	0.2912	0.0119	<.0001	0.0115	0.0783	0.0188	0.0188	0.0476	0.1889	0.2109	0.03	0.8125
Trophic level (Fish Base)	0.2601	0.4815	0.4749	0.5946	0.2374	0.0003	0.5034	0.8807	0.4205	0.2096	0.4078	0.2084	0.0867	0.4108	0.411	0.1551	0.2254	0.1941	0.3866	0.4679	0.5722	0.792	0.6268	0.1929	0.0112	0.4632	0.4052	0.4002	0.4221	0.9267	0.4633	0.0637	0.8624	0.1661	0.0077	0.0006	0.0069	0.0942	0.1762	0.0115	<.0001	0.0789	<.0001	<.0001	0.008	0.0602	0.2102	0.1658	0.7635
Trophic level Avg all species	0.9898	0.9398	0.4593	0.078	0.2853	0.0937	0.9385	0.4587	0.7735	0.6997	0.9817	0.2917	0.1149	0.9796	0.9798	0.452	0.3676	0.7346	0.1981	0.5477	0.7774	0.7929	0.2833	0.0521	0.2479	0.7875	0.4247	0.4238	0.2402	0.6695	0.4187	0.0655	0.8075	0.4613	0.1011	0.1286	0.2185	0.6768	0.196	0.0783	0.0789	<.0001	0.0854	0.0854	0.1429	0.2784	0.0868	0.1799	0.7135
Vulnerability (Fish Base)	0.343	0.7694	0.4171	0.6772	0.3219	0.0025	0.8244	0.8471	0.641	0.3284	0.4234	0.2426	0.1191	0.5473	0.5475	0.1769	0.1987	0.1332	0.5307	0.526	0.739	0.8784	0.5656	0.2107	0.0145	0.3868	0.3834	0.3784	0.576	0.7511	0.4869	0.0627	0.9315	0.1496	0.0066	0.0034	0.0116	0.0604	0.2076	0.0188	<.0001	0.0854	<.0001	<.0001	0.0155	0.0308	0.2122	0.1853	0.5716
Vulnerability (Fish Base)/10	0.343	0.7694	0.4171	0.6772	0.3219	0.0025	0.8244	0.8471	0.641	0.3284	0.4234	0.2426	0.1191	0.5473	0.5475	0.1769	0.1987	0.1332	0.5307	0.526	0.739	0.8784	0.5656	0.2107	0.0145	0.3868	0.3834	0.3784	0.576	0.7511	0.4869	0.0627	0.9315	0.1496	0.0066	0.0034	0.0116	0.0604	0.2076	0.0188	<.0001	0.0854	<.0001	<.0001	0.0155	0.0308	0.2122	0.1853	0.5716
Resilience high (No of species, Fish Base)	0.2606	0.4378	0.2541	0.8749	0.4113	0.0587	0.377	0.7017	0.4058	0.0782	0.4556	0.2952	0.139	0.3545	0.3547	0.352	0.2687	0.2435	0.3688	0.9852	0.3191	0.6236	0.6679	0.5416	0.0346	0.6606	0.6188	0.6148	0.784	0.5911	0.5431	0.437	0.4396	0.4301	0.0013	0.0011	0.0038	0.3836	0.1145	0.0476	0.008	0.1429	0.0155	0.0155	<.0001	0.1453	0.0339	0.1861	0.8746
Resilience medium	0.4296	0.8647	0.3569	0.49	0.432	0.1022	0.5276	0.8387	0.3482	0.2013	0.6208	0.1763	0.6475	0.4744	0.4747	0.3465	0.0659	0.0542	0.2976	0.735	0.2906	0.3875	0.5739	0.1849	0.0033	0.1946	0.4895	0.4837	0.516	0.9186	0.3801	0.1237	0.4234	0.3612	0.0102	0.0913	0.0436	0.0274	0.4788	0.1889	0.0602	0.2784	0.0308	0.0308	0.1453	<.0001	0.1474	0.8177	0.0274
Resilience low	0.7437	0.9353	0.8049	0.4531	0.393	0.385	0.9051	0.9191	0.5986	0.1629	0.8535	0.2625	0.3893	0.7487	0.7489	0.6808	0.3533	0.4769	0.1859	0.2494	0.2867	0.0912	0.8422	0.4199	0.1009	0.5598	0.9418	0.9467	0.7738	0.9793	0.2839	0.4274	0.907	0.5533	0.0132	0.0844	0.0393	0.5181	0.161	0.2109	0.2102	0.0868	0.2122	0.2122	0.0339	0.1474	<.0001	0.5598	0.6037
Resilience very low	0.3381	0.7087	0.5804	0.6362	0.5914	0.305	0.4851	0.6754	0.8304	0.6703	0.0622	0.6443	0.5659	0.7389	0.7388	0.2386	0.73	0.5629	0.5376	0.5733	0.6227	0.635	0.64	0.5562	0.554	0.521	0.868	0.8657	0.5916	0.5	0.6605	0.6963	0.1851	0.5248	0.3296	0.2605	0.3236	0.8799	0.1903	0.03	0.1658	0.1799	0.1853	0.1853	0.1861	0.8177	0.5598	<.0001	0.6382
Resilience high %	0.9377	0.6007	0.8106	0.4741	0.6935	0.7362	0.0953	0.9496	0.63	0.8477	0.8785	0.371	0.5353	0.9779	0.9777	0.7377	0.1943	0.3753	0.589	0.4771	0.585	0.3417	0.2247	0.2827	0.2126	0.3529	0.8548	0.8511	0.6795	0.6194	0.4349	0.3306	0.1329	0.6824	0.4236	0.9322	0.6254	0.136	0.8643	0.8125	0.7635	0.7135	0.5716	0.5716	0.8746	0.0274	0.6037	0.6382	<.0001
Resilience medium %	0.7819	0.5752	0.9412	0.8128	0.8413	0.7657	0.1021	0.9692	0.9375	0.6298	0.841	0.8942	0.2669	0.8425	0.8424	0.9163	0.5592	0.5766	0.8754	0.8777	0.9745	0.8895	0.2275	0.7183	0.8481	0.5114	0.8202	0.819	0.842	0.6622	0.9407	0.7193	0.1102	0.9922	0.6711	0.3691	0.5484	0.3443	0.2821	0.4884	0.6015	0.4962	0.8031	0.8031	0.1871	0.3383	0.3805	0.2584	0.0128
Resilience low %	0.6762	0.8414	0.8821	0.3387	0.3343	0.3539	0.9204	0.9484	0.44	0.1456	0.8152	0.2126	0.4618	0.6863	0.6866	0.6114	0.3046	0.514	0.1247	0.25	0.2261	0.0957	0.9683	0.2969	0.0743	0.5771	0.9575	0.9623	0.6195	0.813	0.2451	0.3552	0.9369	0.5832	0.0139	0.0948	0.0421	0.4916	0.165	0.188	0.2146	0.0726	0.2262	0.2262	0.0496	0.1132	<.0001	0.5762	0.4622
Resilience very low %	0.3381	0.7087	0.5804	0.6362	0.5914	0.305	0.4851	0.6754	0.8304	0.6703	0.0622	0.6443	0.5659	0.7389	0.7388	0.2386	0.73	0.5629	0.5376	0.5733	0.6227	0.635	0.64	0.5562	0.554	0.521	0.868	0.8657	0.5916	0.5	0.6605	0.6963	0.1851	0.5248	0.3296	0.2605	0.3236	0.8799	0.1903	0.03	0.1658	0.1799	0.1853	0.1853	0.1861	0.8177	0.5598	<.0001	0.6382
Substrate complexity high (number of species, RLS Team)	0.4361	0.3149	0.8908	0.9216	0.6881	0.9201	0.7864	0.2956	0.5834	0.9753	0.2516	0.809	0.8276	0.9282	0.9281	0.262	0.8472	0.7954	1	0.1611	0.9469	0.1538	0.1755	0.4027	0.6117	0.7385	0.9675	0.9649	0.5222	0.7692	0.9537	0.6786	0.8315	0.8229	0.1684	0.4908	0.3738	0.9295	0.019	0.1215	0.4662	0.1493	0.3938	0.3938	0.1633	0.4982	0.0443	0.1627	0.8338
Substrate complexity medium	0.2516	0.4161	0.1586	0.7785	0.0938	0.0204	0.6532	0.3652	0.1451	0.0895	0.2946	0.03	0.3099	0.5318	0.5321	0.3731	0.0315	0.3285	0.361	0.9499	0.1297	0.5566	0.4818	0.4081	0.0001	0.4933	0.9508	0.9457	0.6218	0.8539	0.1311	0.2733	0.7398	0.1427	0.0041	0.0043	0.0012	0.0436	0.4722	0.0703	0.0101	0.2679	0.0146	0.0146	0.0221	0.0139	0.1424	0.3079	0.3287
Substrate complexity low	0.4812	0.8077	0.5084	0.5118	0.7351	0.1741	0.9152	0.8614	0.6017	0.1138	0.849	0.4696	0.3069	0.3455	0.3457	0.3983	0.303	0.0546	0.2143	0.6586	0.4135	0.3164	0.6023	0.3042	0.0474	0.3615	0.3611	0.3566	0.6496	0.8157	0.7193	0.2639	0.858	0.6675	0.0008	0.0334	0.0284	0.3452	0.1056	0.1327	0.0481	0.1021	0.0351	0.0351	0.0068	0.0347	0.0057	0.5824	0.5289
Substrate complexity high %	0.568	0.3907	0.5112	0.9278	0.2457	0.8387	0.8789	0.1787	0.2922	0.6216	0.595	0.1655	0.8878	0.7535	0.7533	0.2448	0.1417	0.905	0.8265	0.7001	0.4361	0.8492	0.1485	0.4796	0.6418	0.8049	0.6183	0.6163	0.6884	0.9644	0.2749	0.7116	0.9827	0.4435	0.7171	0.948	0.9902	0.4235	0.0213	0.2931	0.8113	0.3667	0.7732	0.7732	0.5253	0.7273	0.3726	0.3393	0.4226
Substrate complexity medium %	0.4612	0.8711	0.9749	0.5775	0.4058	0.578	0.8851	0.4441	0.8892	0.4696	0.9558	0.5516	0.7211	0.2408	0.2408	0.2418	0.845	0.075	0.4193	0.7416	0.9673	0.5717	0.2659	0.2437	0.4824	0.4012	0.1358	0.1335	0.7394	0.9442	0.4039	0.3475	0.5226	0.5828	0.1073	0.3528	0.3875	0.9608	0.0266	0.2323	0.2754	0.1977	0.221	0.221	0.124	0.2906	0.0867	0.7165	0.8769
Substrate complexity low %	0.4861	0.9057	0.8335	0.4593	0.5522	0.4317	0.8103	0.6482	0.8306	0.2561	0.8936	0.8098	0.6141	0.1716	0.1716	0.3189	0.7846	0.0158	0.2595	0.7924	0.7292	0.5253	0.4052	0.2401	0.2738	0.3367	0.0887	0.0867	0.5643	0.944	0.534	0.3004	0.4242	0.6953	0.0507	0.246	0.2723	0.7156	0.078	0.2857	0.1957	0.2143	0.1474	0.1474	0.091	0.1223	0.0748	0.9229	0.6168
Total Biomass (g)	0.6195	0.6931	0.2132	0.5509	0.4748	0.0672	0.8777	0.5441	0.673	0.738	0.4056	0.4194	0.2106	0.9287	0.9286	0.438	0.4054	0.2263	0.6701	0.6895	0.965	0.9598	0.4947	0.8658	0.1285	0.2203	0.8543	0.8469	0.675	0.2555	0.5145	0.2809	0.5656	0.0504	0.1165	0.0568	0.0651	0.0263	0.5827	0.1775	0.027	0.545	0.0097	0.0097	0.1306	0.1574	0.5821	0.3384	0.7741
Total Biomass tonnes / hectare	0.4695	0.5112	0.9175	0.8668	0.8687	0.6498	0.8131	0.4443	0.6637	0.335	0.1678	0.8907	0.9563	0.7684	0.7684	0.2612	0.9258	0.5878	0.5122	0.4347	0.2763	0.4363	0.5736	0.3843	0.9805	0.2893	0.7004	0.7056	0.6989	0.6824	0.8344	0.7804	0.5119	0.8753	0.6215	0.7384	0.8696	0.6578	0.2297	0.1094	0.436	0.1841	0.4169	0.4169	0.5087	0.954	0.8276	0.0026	0.8337
Biomass <10cm %	0.265	0.8891	0.0333	0.3783	0.8657	0.2834	0.9142	0.9233	0.8929	0.2651	0.2978	0.5774	0.7169	0.53	0.5302	0.3953	0.3928	0.0673	0.91	0.4948	0.3257	0.2615	0.8612	0.9919	0.0587	0.0817	0.9045	0.8962	0.5084	0.2954	0.7213	0.6361	0.7116	0.3506	0.0336	0.0831	0.0336	0.0597	0.3935	0.2611	0.1009	0.9272	0.058	0.058	0.0643	0.0537	0.2517	0.6674	0.5075
≤10	0.269	0.4631	0.47	0.5077	0.2749	0.0011	0.5466	0.8638	0.3672	0.2173	0.4406	0.2055	0.1015	0.3919	0.3921	0.1703	0.1621	0.1898	0.3406	0.4113	0.6134	0.7542	0.6548	0.1574	0.0129	0.6383	0.31	0.3068	0.3809	0.9249	0.5061	0.0814	0.8943	0.253	0.0056	0.0017	0.013	0.1516	0.1796	0.0126	<.0001	0.0516	<.0001	<.0001	0.0074	0.0491	0.1954	0.1408	0.6891
≤12.5-≥20	0.3179	0.8955	0.1005	0.5789	0.6539	0.0757	0.9757	0.821	0.9955	0.3965	0.312	0.4743	0.3578	0.629	0.6292	0.2818	0.3418	0.075	0.9254	0.97	0.6405	0.7035	0.7435	0.7228	0.0457	0.1392	0.6644	0.6568	0.7422	0.3267	0.6645	0.3102	0.7143	0.1742	0.0266	0.03	0.024	0.0321	0.3455	0.1165	0.0157	0.5504	0.0047	0.0047	0.0435	0.0503	0.337	0.3908	0.5978
≥25	0.8413	0.9958	0.2987	0.7805	0.7671	0.9522	0.9072	0.9026	0.9753	0.194	0.8667	0.9186	0.5918	0.5819	0.582	0.8975	0.6607	0.1927	0.6232	0.2831	0.4338	0.1099	0.6051	0.6949	0.4495	0.5629	0.8168	0.8136	0.5959	0.3106	0.9839	0.7499	0.5796	0.9202	0.1008	0.2826	0.2198	0.9215	0.3767	0.7678	0.529	0.6965	0.4755	0.4755	0.0709	0.4184	0.0365	0.9883	0.8812
Total Biomass Reef	0.62	0.6198	0.2744	0.7701	0.4415	0.0698	0.7804	0.4401	0.7109	0.5863	0.4235	0.3429	0.1756	0.9534	0.9533	0.3994	0.3347	0.2034	0.9432	0.988	0.9216	0.6815	0.42	0.6595	0.0726	0.2414	0.8475	0.8401	0.7185	0.2865	0.4138	0.2297	0.5841	0.0746	0.023	0.0225	0.0196	0.0485	0.3117	0.0907	0.0141	0.246	0.0034	0.0034	0.0359	0.0851	0.1745	0.246	0.6872
Total Biomass Mangrove	0.9767	0.9646	0.4334	0.8776	0.3783	0.1626	0.6501	0.8317	0.9277	0.4238	0.9548	0.3478	0.2758	0.968	0.9682	0.8798	0.4392	0.1393	0.8847	0.9546	0.6072	0.7129	0.7931	0.9646	0.1472	0.0469	0.9925	0.9821	0.9513	0.6106	0.3977	0.2698	0.8958	0.0473	0.2808	0.1662	0.1373	0.0066	0.8876	0.7027	0.1793	0.9741	0.1225	0.1225	0.4245	0.1575	0.677	0.6797	0.5131
Total Biomass Seagrass	0.1748	0.1093	0.4147	0.6016	0.249	0.1408	0.1523	0.1441	0.0447	0.0125	0.4654	0.1847	0.3689	0.2031	0.2033	0.4244	0.2678	0.5758	0.1148	0.7191	0.041	0.443	0.6012	0.4725	0.0355	0.8551	0.9194	0.9163	0.4467	0.7844	0.3837	0.595	0.6109	0.6909	0.0212	0.0184	0.0171	0.6001	0.1955	0.1143	0.0888	0.2596	0.1815	0.1815	0.0082	0.2414	0.044	0.3747	0.9739
Abudefduf saxatilis	0.789	0.5717	0.9294	0.482	0.2079	0.0201	0.9986	0.887	0.5579	0.5212	0.9655	0.2591	0.2395	0.7108	0.711	0.4841	0.3695	0.2636	0.5298	0.3331	0.7646	0.4714	0.9419	0.3373	0.1163	0.2119	0.5486	0.5414	0.2431	0.6454	0.4369	0.0371	0.4623	0.0765	0.4136	0.1818	0.2491	0.0139	0.932	0.4106	0.086	0.5799	0.0795	0.0795	0.6249	0.1552	0.8905	0.9447	0.3904
Acanthurus bahianus	0.9708	0.8951	0.4143	0.9692	0.8407	0.7943	0.81	0.9781	0.8869	0.1034	0.6716	0.6119	0.4706	0.6556	0.6557	0.756	0.5772	0.1812	0.4287	0.184	0.2417	0.0559	0.7599	0.6998	0.2995	0.2744	0.9368	0.9433	0.8066	0.4986	0.642	0.9992	0.7782	0.683	0.1101	0.2267	0.141	0.5319	0.5829	0.9061	0.5229	0.7827	0.4798	0.4798	0.1189	0.3212	0.0326	0.6173	0.9123
Acanthurus chirurgus	0.9013	0.7021	0.5712	0.6324	0.5966	0.3065	0.5776	0.6681	0.6167	0.8764	0.8928	0.6449	0.5621	0.7409	0.7408	0.8529	0.7052	0.3869	0.5397	0.586	0.8177	0.6523	0.8471	0.8817	0.4994	0.1527	0.9914	0.9838	0.886	0.6281	0.659	0.3654	0.8395	0.0877	0.875	0.583	0.5854	0.0286	0.5426	0.9124	0.4123	0.6761	0.3016	0.3016	0.9355	0.4343	0.4771	0.7627	0.556
Acanthurus coeruleus	0.4291	0.4361	0.0845	0.6012	0.3155	0.3412	0.7188	0.203	0.2802	0.0462	0.5941	0.2032	0.6997	0.5018	0.502	0.8737	0.2844	0.2729	0.6145	0.3193	0.019	0.1603	0.2745	0.6984	0.045	0.0981	0.5486	0.5563	0.912	0.7187	0.2747	0.829	0.7493	0.2287	0.1508	0.1207	0.0415	0.0494	0.9889	0.6932	0.3057	0.6462	0.3243	0.3243	0.2174	0.1467	0.3676	0.6912	0.5383
Anisotremus virginicus	0.7109	0.8719	0.049	0.002	0.606	0.6206	0.4782	0.7528	0.5244	0.86	0.423	0.6406	0.8877	0.8027	0.8028	0.6997	0.7702	0.8275	0.066	0.9777	0.9885	0.9902	0.993	0.0224	0.6464	0.8838	0.4431	0.4414	0.0386	0.036	0.6958	0.0776	0.0272	0.9223	0.7757	0.9674	0.9634	0.8545	0.6979	0.7289	0.8647	0.1263	0.8653	0.8653	0.7665	0.4287	0.4941	0.6533	0.1786
Apogon townsendi	0.0415	0.5453	0.895	0.8603	0.5622	0.4827	0.4297	0.4966	0.3916	0.9602	0.22	0.475	0.3455	0.1125	0.1125	0.0182	0.5472	0.568	0.8759	0.5692	0.7845	0.3946	0.4462	0.1187	0.6488	0.4265	0.2962	0.2935	0.3872	0.1453	0.309	0.272	0.1798	0.55	0.9882	0.9893	0.9456	0.6634	0.3341	0.277	0.5801	0.9003	0.6325	0.6325	0.8444	0.6134	0.3953	0.7855	0.5825
Aulostomus maculatus	0.8599	0.7087	0.5804	0.6362	0.0117	0.3693	0.5866	0.6754	0.5952	0.6081	0.7819	0.0956	0.3791	0.5228	0.5226	0.962	0.7701	0.2815	0.5376	0.5733	0.3715	0.6112	0.7188	0.8301	0.4155	0.6692	0.0903	0.0923	0.6555	0.514	0.0216	0.4303	0.6672	0.059	0.7513	0.3574	0.2673	0.3287	1	0.5733	0.6231	0.567	0.7872	0.7872	0.7494	0.9771	0.4619	0.7681	0.9183
Bodianus rufus	0.7823	0.7087	0.5804	0.9267	0.8833	0.9805	0.5866	0.6754	0.7772	0.2915	0.7168	0.6798	0.5659	0.9956	0.9956	0.6958	0.709	0.3775	0.6008	0.1052	0.4316	0.0303	0.64	0.6928	0.4654	0.3654	0.7144	0.7196	0.5904	0.4406	0.5754	0.9388	0.7027	0.6854	0.1648	0.3574	0.2163	0.6701	0.5371	0.9115	0.6943	0.6683	0.6126	0.6126	0.1861	0.4428	0.0186	0.7681	0.9183
Canthigaster rostrata	0.5379	0.419	0.9364	0.4202	0.0011	0.2483	0.9156	0.4282	0.3135	0.2996	0.6658	0.0068	0.2005	0.605	0.6046	0.4914	0.1715	0.7556	0.2992	0.879	0.248	0.6939	0.5415	0.9982	0.2055	0.7242	0.2872	0.2901	0.3991	0.7025	0.0052	0.4667	0.8603	0.0289	0.5925	0.275	0.227	0.1424	0.3886	0.9944	0.526	0.6884	0.6326	0.6326	0.7428	0.5205	0.5704	0.7175	0.6123
Carangoides ruber	0.8882	0.6469	0.5164	0.6063	0.6636	0.3254	0.5129	0.6027	0.5619	0.9313	0.9308	0.6778	0.5465	0.7658	0.7657	0.8691	0.6973	0.2962	0.5499	0.6715	0.8337	0.7677	0.7783	0.8496	0.4746	0.119	0.9518	0.9438	0.8234	0.548	0.6932	0.38	0.8445	0.096	0.7798	0.5452	0.5348	0.0267	0.5973	0.9157	0.3938	0.6922	0.2718	0.2718	0.9736	0.3818	0.5851	0.7293	0.5435
Cephalopholis cruentata	0.4732	0.9742	0.2411	0.5471	0.0979	0.8982	0.8594	0.7999	0.7844	0.7865	0.9517	0.2791	0.8827	0.245	0.2449	0.5627	0.9896	0.0236	0.7301	0.5711	0.7525	0.7447	0.5735	0.9652	0.8663	0.6124	0.0567	0.0564	0.7577	0.3913	0.0836	0.9137	0.7777	0.4028	0.5506	0.8252	0.967	0.9471	0.6232	0.8801	0.5646	0.7454	0.4273	0.4273	0.5256	0.4746	0.8351	0.9149	0.9194
Chaetodipterus faber	0.3381	0.7087	0.5804	0.6362	0.5914	0.305	0.4851	0.6754	0.8304	0.6703	0.0622	0.6443	0.5659	0.7389	0.7388	0.2386	0.73	0.5629	0.5376	0.5733	0.6227	0.635	0.64	0.5562	0.554	0.521	0.868	0.8657	0.5916	0.5	0.6605	0.6963	0.1851	0.5248	0.3296	0.2605	0.3236	0.8799	0.1903	0.03	0.1658	0.1799	0.1853	0.1853	0.1861	0.8177	0.5598	<.0001	0.6382
Chaetodon capistratus	0.132	0.168	0.9972	0.6213	0.7471	0.3927	0.1064	0.4696	0.3041	0.0661	0.7977	0.6743	0.6111	0.0178	0.0178	0.1922	0.6072	0.2484	0.1645	0.8458	0.2624	0.7687	0.6488	0.3903	0.4099	0.4572	0.3009	0.2969	0.3711	0.4712	0.4528	0.5085	0.8108	0.541	0.2037	0.1933	0.2717	0.8542	0.0299	0.226	0.2655	0.4906	0.3974	0.3974	0.0796	0.6935	0.1976	0.8258	0.4315
Chaetodon ocellatus	0.8682	0.4071	0.8449	0.4655	0.0528	0.3102	0.7408	0.3495	0.2592	0.9518	0.9068	0.0908	0.6069	0.6641	0.6638	0.8657	0.2322	0.4193	0.6769	0.3171	0.7631	0.3477	0.3302	0.6585	0.5137	0.5609	0.6699	0.6678	0.3128	0.4983	0.1473	0.5388	0.9586	0.2478	0.843	0.7501	0.8256	0.4211	0.293	0.8852	0.6885	0.7892	0.8126	0.8126	0.6886	0.7842	0.4734	0.8	0.54
Chaetodon striatus	0.6463	0.1977	0.3596	0.9431	0.6143	0.661	0.4136	0.2206	0.2354	0.0054	0.7908	0.477	0.4743	0.2779	0.2781	0.8152	0.5418	0.3401	0.1978	0.3075	0.0307	0.1402	0.7734	0.6774	0.2387	0.5058	0.896	0.9008	0.81	0.8473	0.6294	0.8145	0.6326	0.8765	0.1544	0.1629	0.1227	0.7529	0.6341	0.8825	0.517	0.9681	0.6376	0.6376	0.0919	0.5036	0.085	0.6311	0.7565
Chromis multilineata	0.3293	0.0001	0.5804	0.7754	0.5914	0.4233	0.0149	0.0036	0.0153	0.0314	0.9387	0.6443	0.5659	0.0752	0.0752	0.9022	0.709	0.7035	0.2146	0.5733	0.0843	0.6834	0.4785	0.9056	0.4732	0.8679	0.6697	0.6694	0.2505	0.5527	0.9418	0.8561	0.7783	0.8082	0.7127	0.3574	0.5211	0.9039	1	0.9115	0.5651	0.7266	0.862	0.862	0.4202	0.9771	0.9428	0.7681	0.4212
Coryphopterus glaucofraenum	0.5583	0.1593	0.3772	0.9358	0.3372	0.088	0.3638	0.2643	0.3132	0.1683	0.9531	0.3896	0.2738	0.378	0.3781	0.7653	0.4883	0.261	0.6329	0.4391	0.3152	0.6009	0.8169	0.9252	0.1861	0.2746	0.7399	0.7331	0.4742	0.9997	0.6622	0.4544	0.9589	0.2059	0.5151	0.1583	0.2348	0.0935	0.7466	0.7355	0.1778	0.7174	0.2312	0.2312	0.4572	0.4282	0.7391	0.7147	0.9698
Coryphopterus personatus	0.3094	0.8671	0.7918	0.7758	0.3307	0.0721	0.3892	0.8492	0.7376	0.848	0.1633	0.3794	0.2625	0.9189	0.9191	0.1676	0.4964	0.8847	0.8225	0.4567	0.8956	0.6042	0.5744	0.2248	0.2392	0.6656	0.7988	0.799	0.7946	0.8691	0.5066	0.2886	0.4124	0.4088	0.1217	0.0718	0.1322	0.6644	0.1108	0.0049	0.0339	0.0319	0.0541	0.0541	0.0633	0.4865	0.2976	0.0008	0.799
Diodon hystrix	0.7823	0.7087	0.5804	0.9267	0.8833	0.9805	0.5866	0.6754	0.7772	0.2915	0.7168	0.6798	0.5659	0.9956	0.9956	0.6958	0.709	0.3775	0.6008	0.1052	0.4316	0.0303	0.64	0.6928	0.4654	0.3654	0.7144	0.7196	0.5904	0.4406	0.5754	0.9388	0.7027	0.6854	0.1648	0.3574	0.2163	0.6701	0.5371	0.9115	0.6943	0.6683	0.6126	0.6126	0.1861	0.4428	0.0186	0.7681	0.9183
Echeneis neucratoides	0.7823	0.7087	0.5804	0.9267	0.8833	0.9805	0.5866	0.6754	0.7772	0.2915	0.7168	0.6798	0.5659	0.9956	0.9956	0.6958	0.709	0.3775	0.6008	0.1052	0.4316	0.0303	0.64	0.6928	0.4654	0.3654	0.7144	0.7196	0.5904	0.4406	0.5754	0.9388	0.7027	0.6854	0.1648	0.3574	0.2163	0.6701	0.5371	0.9115	0.6943	0.6683	0.6126	0.6126	0.1861	0.4428	0.0186	0.7681	0.9183
Elacatinus xanthiprora	0.6238	0.574	0.4008	0.4745	0.4152	0.1002	0.9834	0.5278	0.5759	0.6772	0.2201	0.4854	0.3823	0.6167	0.6166	0.3664	0.5871	0.7394	0.3466	0.3917	0.6037	0.4729	0.6481	0.8019	0.332	0.4745	0.9209	0.9257	0.6486	0.3986	0.5059	0.2962	0.5356	0.0462	0.4633	0.2263	0.2662	0.0597	0.7953	0.1827	0.0921	0.6599	0.0595	0.0595	0.4745	0.4192	0.8061	0.1738	0.8464
Equetus punctatus	0.7823	0.7087	0.5804	0.9267	0.8833	0.9805	0.5866	0.6754	0.7772	0.2915	0.7168	0.6798	0.5659	0.9956	0.9956	0.6958	0.709	0.3775	0.6008	0.1052	0.4316	0.0303	0.64	0.6928	0.4654	0.3654	0.7144	0.7196	0.5904	0.4406	0.5754	0.9388	0.7027	0.6854	0.1648	0.3574	0.2163	0.6701	0.5371	0.9115	0.6943	0.6683	0.6126	0.6126	0.1861	0.4428	0.0186	0.7681	0.9183
Ginglymostoma cirratum	0.6664	0.7385	0.0469	0.0002	0.5914	0.417	0.5866	0.6754	0.5485	0.8341	0.3255	0.6443	0.5659	0.7358	0.7359	0.692	0.709	0.6852	0.0544	0.5733	0.8127	0.635	0.666	0.0172	0.6393	0.9807	0.2319	0.231	0.0148	0.0621	0.8017	0.0471	0.0437	0.9834	0.7127	0.8592	1	0.8799	0.6837	0.654	0.6411	0.0659	0.6523	0.6523	0.922	0.4428	0.5598	0.7681	0.3007
Gymnothorax funebris	0.3381	0.7087	0.5804	0.6362	0.5914	0.305	0.4851	0.6754	0.8304	0.6703	0.0622	0.6443	0.5659	0.7389	0.7388	0.2386	0.73	0.5629	0.5376	0.5733	0.6227	0.635	0.64	0.5562	0.554	0.521	0.868	0.8657	0.5916	0.5	0.6605	0.6963	0.1851	0.5248	0.3296	0.2605	0.3236	0.8799	0.1903	0.03	0.1658	0.1799	0.1853	0.1853	0.1861	0.8177	0.5598	<.0001	0.6382
Haemulon carbonarium	0.7183	0.4118	0.4212	0.7694	0.4352	0.1548	0.6431	0.5008	0.6103	0.4516	0.9261	0.5038	0.403	0.6334	0.6335	0.8109	0.5903	0.3216	0.984	0.4122	0.5818	0.5138	0.858	0.8485	0.3151	0.2341	0.8251	0.8182	0.6702	0.8917	0.7094	0.459	0.9606	0.1652	0.753	0.3264	0.4064	0.0645	0.5672	0.8735	0.283	0.5681	0.2963	0.2963	0.7609	0.4871	0.4716	0.6713	0.8869
Haemulon flavolineatum	0.3467	0.8888	0.4654	0.8794	0.5446	0.6218	0.767	0.7874	0.5596	0.9078	0.5342	0.8891	0.5484	0.4248	0.4248	0.3433	0.4152	0.3031	0.9551	0.3343	0.8303	0.4389	0.5331	0.3332	0.5621	0.8776	0.1233	0.1246	0.6916	0.9283	0.4722	0.672	0.4093	0.55	0.6673	0.9994	0.9248	0.725	0.8847	0.5744	0.5479	0.8705	0.4516	0.4516	0.9582	0.2392	0.5462	0.6766	0.1971
Haemulon macrostomum	0.9042	0.7087	0.5804	0.6362	0.5914	0.305	0.5866	0.6754	0.6229	0.8667	0.8875	0.6443	0.5659	0.7389	0.7388	0.8488	0.709	0.3997	0.5376	0.5733	0.8127	0.635	0.8547	0.8877	0.5049	0.1582	0.9935	0.9861	0.8947	0.6401	0.6585	0.3635	0.8371	0.088	0.8895	0.5902	0.595	0.0294	0.5371	0.9115	0.4157	0.6743	0.3063	0.3063	0.922	0.4428	0.4619	0.7681	0.5586
Haemulon plumierii	0.335	0.7171	0.5279	0.6551	0.5407	0.2667	0.5028	0.6707	0.853	0.8017	0.0679	0.5714	0.4921	0.7684	0.7683	0.2425	0.6648	0.6561	0.6164	0.6783	0.7226	0.7817	0.6136	0.5562	0.451	0.609	0.8504	0.8488	0.5862	0.4622	0.588	0.6612	0.1721	0.4662	0.2261	0.1828	0.2238	0.8004	0.1532	0.0216	0.1246	0.1459	0.1394	0.1394	0.1153	0.7113	0.4004	<.0001	0.6623
Haemulon sciurus	0.8079	0.6848	0.5631	0.9206	0.8557	0.9747	0.5685	0.6895	0.7978	0.2965	0.7712	0.6439	0.605	0.9742	0.9741	0.7156	0.6782	0.4025	0.6056	0.0862	0.4071	0.0217	0.7033	0.715	0.4388	0.3658	0.6693	0.6744	0.5725	0.4487	0.5329	0.94	0.7017	0.6749	0.1537	0.3571	0.2035	0.6493	0.5264	0.8817	0.6959	0.6559	0.6122	0.6122	0.1854	0.4151	0.0148	0.801	0.8607
Halichoeres bivittatus	0.9761	0.7797	0.5112	0.5956	0.6346	0.2578	0.7042	0.6909	0.6379	0.9266	0.8664	0.6923	0.478	0.9051	0.905	0.762	0.7788	0.2782	0.6178	0.6817	0.9472	0.7714	0.7386	0.873	0.4217	0.0888	0.9487	0.9398	0.8741	0.5963	0.7144	0.3443	0.8998	0.09	0.7072	0.4307	0.4354	0.0257	0.736	0.8018	0.3168	0.7152	0.2293	0.2293	0.834	0.4032	0.6536	0.7764	0.6834
Holacanthus ciliaris	0.5433	0.9679	0.6424	0.8685	0.527	0.8682	0.6212	0.294	0.2442	0.5242	0.4602	0.3332	0.2192	0.8805	0.8807	0.7944	0.4071	0.9385	0.5881	0.0729	0.0819	0.0668	0.0045	0.6404	0.2763	0.4595	0.3419	0.3441	0.9429	0.4466	0.2721	0.8985	0.4802	0.8891	0.6067	0.9784	0.5628	0.3658	0.9378	0.8863	0.8187	0.7928	0.8381	0.8381	0.8738	0.2308	0.506	0.681	0.0384
Holocentrus rufus	0.3381	0.7087	0.5804	0.6362	0.5914	0.305	0.4851	0.6754	0.8304	0.6703	0.0622	0.6443	0.5659	0.7389	0.7388	0.2386	0.73	0.5629	0.5376	0.5733	0.6227	0.635	0.64	0.5562	0.554	0.521	0.868	0.8657	0.5916	0.5	0.6605	0.6963	0.1851	0.5248	0.3296	0.2605	0.3236	0.8799	0.1903	0.03	0.1658	0.1799	0.1853	0.1853	0.1861	0.8177	0.5598	<.0001	0.6382
Hypoplectrus nigricans	0.1514	0.258	0.4168	0.8918	0.3521	0.0779	0.047	0.3925	0.3169	0.4807	0.1609	0.4216	0.2898	0.5195	0.5196	0.2581	0.51	0.8955	0.8408	0.269	0.6868	0.3802	0.9396	0.5913	0.2727	0.5588	0.8024	0.8037	0.7414	0.8288	0.6944	0.6601	0.2222	0.552	0.2532	0.0717	0.1707	0.7893	0.3075	0.0502	0.0587	0.3231	0.1335	0.1335	0.0771	0.751	0.7178	0.0196	0.423
Hypoplectrus puella	0.2367	0.6017	0.1745	0.4357	0.4173	0.0378	0.2728	0.7458	0.7932	0.4763	0.2108	0.4897	0.2209	0.6308	0.6309	0.2851	0.6078	0.4536	0.7581	0.4464	0.6955	0.6043	0.7348	0.9548	0.1573	0.4092	0.9036	0.8975	0.8722	0.4482	0.6734	0.4429	0.3247	0.1269	0.2095	0.0347	0.0695	0.1199	0.4929	0.1182	0.0228	0.7673	0.0318	0.0318	0.0967	0.4362	0.8748	0.2147	0.6357
Hypoplectrus unicolor	0.3381	0.7087	0.5804	0.6362	0.5914	0.305	0.4851	0.6754	0.8304	0.6703	0.0622	0.6443	0.5659	0.7389	0.7388	0.2386	0.73	0.5629	0.5376	0.5733	0.6227	0.635	0.64	0.5562	0.554	0.521	0.868	0.8657	0.5916	0.5	0.6605	0.6963	0.1851	0.5248	0.3296	0.2605	0.3236	0.8799	0.1903	0.03	0.1658	0.1799	0.1853	0.1853	0.1861	0.8177	0.5598	<.0001	0.6382
Lucayablennius zingaro	0.3293	0.0001	0.5804	0.7754	0.5914	0.4233	0.0149	0.0036	0.0153	0.0314	0.9387	0.6443	0.5659	0.0752	0.0752	0.9022	0.709	0.7035	0.2146	0.5733	0.0843	0.6834	0.4785	0.9056	0.4732	0.8679	0.6697	0.6694	0.2505	0.5527	0.9418	0.8561	0.7783	0.8082	0.7127	0.3574	0.5211	0.9039	1	0.9115	0.5651	0.7266	0.862	0.862	0.4202	0.9771	0.9428	0.7681	0.4212
Lutjanus apodus	0.6664	0.7385	0.0469	0.0002	0.5914	0.417	0.5866	0.6754	0.5485	0.8341	0.3255	0.6443	0.5659	0.7358	0.7359	0.692	0.709	0.6852	0.0544	0.5733	0.8127	0.635	0.666	0.0172	0.6393	0.9807	0.2319	0.231	0.0148	0.0621	0.8017	0.0471	0.0437	0.9834	0.7127	0.8592	1	0.8799	0.6837	0.654	0.6411	0.0659	0.6523	0.6523	0.922	0.4428	0.5598	0.7681	0.3007
Lutjanus griseus	0.7325	0.7869	0.0648	0.001	0.5705	0.5024	0.5182	0.7843	0.4738	0.849	0.421	0.5899	0.7828	0.7652	0.7653	0.6769	0.6584	0.7641	0.063	0.7584	0.9519	0.8038	0.9535	0.0164	0.5959	0.9726	0.336	0.3349	0.0237	0.0445	0.7118	0.0625	0.0307	0.9574	0.7378	0.9567	0.9853	0.8209	0.7353	0.6808	0.7464	0.1027	0.75	0.75	0.8167	0.3861	0.5659	0.727	0.1778
Lutjanus jocu	0.8613	0.9012	0.535	0.9511	0.8363	0.9512	0.7395	0.8494	0.9404	0.1934	0.7082	0.6399	0.5193	0.8684	0.8685	0.7038	0.676	0.3489	0.5082	0.1214	0.3275	0.0351	0.6943	0.6807	0.4122	0.3723	0.7479	0.7533	0.675	0.4789	0.5781	0.9225	0.6772	0.7032	0.1455	0.2984	0.1819	0.6776	0.5339	0.9011	0.6453	0.6946	0.596	0.596	0.1478	0.4411	0.0179	0.7413	0.9863
Lutjanus synagris	0.6664	0.7385	0.0469	0.0002	0.5914	0.417	0.5866	0.6754	0.5485	0.8341	0.3255	0.6443	0.5659	0.7358	0.7359	0.692	0.709	0.6852	0.0544	0.5733	0.8127	0.635	0.666	0.0172	0.6393	0.9807	0.2319	0.231	0.0148	0.0621	0.8017	0.0471	0.0437	0.9834	0.7127	0.8592	1	0.8799	0.6837	0.654	0.6411	0.0659	0.6523	0.6523	0.922	0.4428	0.5598	0.7681	0.3007
Malacoctenus triangulatus	0.798	0.5868	0.4172	0.6286	0.567	0.3571	0.4251	0.5417	0.5451	0.7075	0.9526	0.5173	0.3989	0.7573	0.7572	0.9769	0.5872	0.1973	0.7745	0.8037	0.8535	0.6128	0.6785	0.7358	0.3069	0.0532	0.8541	0.8638	0.6866	0.3971	0.4786	0.4318	0.9916	0.065	0.4111	0.3185	0.2476	0.0194	0.8107	0.8724	0.3313	0.8728	0.2139	0.2139	0.5752	0.2524	0.7475	0.6688	0.5534
Microspathodon chrysurus	0.9272	0.5552	0.7275	0.5055	0.0046	0.1315	0.5209	0.6408	0.441	0.3618	0.7204	0.0497	0.2077	0.7734	0.7731	0.7934	0.5557	0.5977	0.3512	0.6974	0.2815	0.6354	0.8228	0.589	0.1672	0.5089	0.2393	0.2436	0.4793	0.5215	0.0191	0.2205	0.7389	0.0301	0.3829	0.122	0.0886	0.1715	0.7505	0.316	0.2713	0.3439	0.3909	0.3909	0.3988	0.6097	0.2803	0.6418	0.9671
Ocyurus chrysurus	0.4384	0.5995	0.4336	0.6223	0.5626	0.3365	0.6771	0.5555	0.741	0.9663	0.1296	0.5295	0.4156	0.7489	0.7488	0.3587	0.619	0.8684	0.726	0.9118	0.9005	0.7334	0.5094	0.7033	0.366	0.8303	0.7482	0.7484	0.4471	0.3135	0.5005	0.7359	0.1413	0.4259	0.1015	0.1171	0.115	0.7392	0.1108	0.0352	0.1238	0.1299	0.1226	0.1226	0.0411	0.5766	0.1276	0.0025	0.6882
Odontoscion dentex	0.6664	0.7385	0.0469	0.0002	0.5914	0.417	0.5866	0.6754	0.5485	0.8341	0.3255	0.6443	0.5659	0.7358	0.7359	0.692	0.709	0.6852	0.0544	0.5733	0.8127	0.635	0.666	0.0172	0.6393	0.9807	0.2319	0.231	0.0148	0.0621	0.8017	0.0471	0.0437	0.9834	0.7127	0.8592	1	0.8799	0.6837	0.654	0.6411	0.0659	0.6523	0.6523	0.922	0.4428	0.5598	0.7681	0.3007
Platybelone araglus	1	1	1	1	1	1	1	1	1	1	1	1	1	1	1	1	1	1	1	1	1	1	1	1	1	1	1	1	1	1	1	1	1	1	1	1	1	1	1	1	1	1	1	1	1	1	1	1	1
Pomacanthus arcuatus	0.7318	0.7602	0.6331	0.2175	0.4197	0.6944	0.4481	0.9882	0.4462	0.8074	0.5965	0.2982	0.6524	0.9576	0.9574	0.4797	0.3874	0.9236	0.3038	0.3181	0.4958	0.2694	0.308	0.08	0.2515	0.7744	0.8154	0.8173	0.4955	0.2668	0.2609	0.2667	0.2997	0.821	0.3314	0.7533	0.4827	0.5097	0.4811	0.3393	0.7129	0.1888	0.6729	0.6729	0.8098	0.1551	0.1751	0.7001	0.0399
Pseudupeneus maculatus	0.5834	0.6083	0.5867	0.9403	0.5093	0.3104	0.8832	0.4711	0.7891	0.7424	0.2994	0.4453	0.3161	0.816	0.8158	0.4261	0.5386	0.8933	0.921	0.7122	0.97	0.4924	0.4229	0.5609	0.2665	0.9834	0.8521	0.8539	0.6318	0.4198	0.4208	0.5575	0.2859	0.4094	0.0414	0.0803	0.0694	0.6621	0.0837	0.0447	0.1071	0.0572	0.0985	0.0985	0.0214	0.3982	0.0243	0.0279	0.8696
Pterois volitans	0.6664	0.7385	0.0469	0.0002	0.5914	0.417	0.5866	0.6754	0.5485	0.8341	0.3255	0.6443	0.5659	0.7358	0.7359	0.692	0.709	0.6852	0.0544	0.5733	0.8127	0.635	0.666	0.0172	0.6393	0.9807	0.2319	0.231	0.0148	0.0621	0.8017	0.0471	0.0437	0.9834	0.7127	0.8592	1	0.8799	0.6837	0.654	0.6411	0.0659	0.6523	0.6523	0.922	0.4428	0.5598	0.7681	0.3007
Scarus iseri	0.845	0.9012	0.2987	0.6077	0.4247	0.1264	0.8169	0.7983	0.8129	0.6074	0.7407	0.4147	0.2812	0.9742	0.974	0.7206	0.4829	0.2029	0.7881	0.7899	0.7986	0.993	0.7369	0.9001	0.1809	0.0921	0.9911	0.9818	0.8521	0.4372	0.4818	0.3215	0.8437	0.0392	0.32	0.1531	0.1488	0.0088	0.9407	0.5453	0.1267	0.983	0.082	0.082	0.3952	0.22	0.9039	0.9701	0.6807
Scomberomorus regalis	0.8336	0.9529	0.3305	0.0923	0.3235	0.0675	0.8805	0.4469	0.8131	0.8851	0.7699	0.3998	0.2887	0.9846	0.9844	0.2326	0.512	0.8539	0.3822	0.2986	0.5508	0.386	0.4594	0.0103	0.3173	0.9239	0.3766	0.3753	0.1763	0.3996	0.5288	0.0129	0.4766	0.4139	0.3105	0.2957	0.4322	0.4734	0.2995	0.0666	0.1044	0.0039	0.1029	0.1029	0.4742	0.2985	0.4856	0.1853	0.4804
Serranus tigrinus	0.3262	0.9423	0.8607	0.5234	0.7227	0.2147	0.7281	0.8222	0.638	0.9434	0.2819	0.591	0.5999	0.7256	0.7257	0.1757	0.3963	0.8605	0.6748	0.4497	0.7833	0.624	0.754	0.1022	0.3234	0.4774	0.3773	0.3796	0.6414	0.9641	0.8611	0.3519	0.8642	0.97	0.148	0.2568	0.355	0.9535	0.1321	0.0287	0.1143	0.0287	0.1224	0.1224	0.1578	0.3309	0.3408	0.0157	0.7351
Serranus tortugarum	0.3064	0.0013	0.4385	0.909	0.528	0.2592	0.027	0.0109	0.0332	0.0432	0.9675	0.5813	0.4622	0.0913	0.0914	0.8085	0.6268	0.5323	0.3216	0.4296	0.1181	0.5519	0.5354	0.8937	0.36	0.9045	0.6209	0.6192	0.2879	0.6867	0.9873	0.9701	0.7777	0.9064	0.6514	0.2621	0.419	0.7491	0.9276	0.8253	0.387	0.6744	0.6166	0.6166	0.395	0.8553	0.7917	0.8005	0.5007
Sparisoma aurofrenatum	0.7726	0.7297	0.3684	0.5205	0.0225	0.4419	0.5243	0.7996	0.6765	0.7656	0.86	0.1542	0.354	0.4729	0.4727	0.9458	0.9194	0.1639	0.5251	0.7079	0.5598	0.7865	0.9197	0.7546	0.6112	0.9565	0.1214	0.1229	0.5968	0.4526	0.0454	0.4603	0.6357	0.1213	0.8819	0.4519	0.4007	0.593	0.9152	0.5661	0.7119	0.4272	0.9049	0.9049	0.8078	0.7867	0.4789	0.637	0.7177
Sparisoma viride	0.4086	0.0805	0.1274	0.7142	0.5701	0.2321	0.2501	0.1028	0.1889	0.0346	0.9512	0.4887	0.3948	0.1877	0.1878	0.9108	0.431	0.1659	0.5478	0.7631	0.1112	0.9714	0.652	0.6264	0.1785	0.3636	0.7262	0.7209	0.6822	0.7446	0.8483	0.9313	0.7063	0.5148	0.3451	0.1398	0.1833	0.263	0.8718	0.8587	0.251	0.5534	0.3298	0.3298	0.2381	0.4258	0.9342	0.6476	0.8183
Stegastes adustus	0.2758	0.637	0.5379	0.4038	0.6008	0.7278	0.474	0.5924	0.6007	0.4805	0.1001	0.6077	0.966	0.9825	0.9824	0.2363	0.8142	0.7403	0.3225	0.4891	0.3801	0.4812	0.4944	0.7515	0.9397	0.4052	0.7232	0.7276	0.4116	0.3984	0.5442	0.8869	0.2436	0.7596	0.6105	0.638	0.7863	0.5739	0.1658	0.1237	0.4161	0.4419	0.419	0.419	0.3369	0.8472	0.8977	0.0029	0.4117
Stegastes diencaeus	0.9042	0.7087	0.5804	0.6362	0.5914	0.305	0.5866	0.6754	0.6229	0.8667	0.8875	0.6443	0.5659	0.7389	0.7388	0.8488	0.709	0.3997	0.5376	0.5733	0.8127	0.635	0.8547	0.8877	0.5049	0.1582	0.9935	0.9861	0.8947	0.6401	0.6585	0.3635	0.8371	0.088	0.8895	0.5902	0.595	0.0294	0.5371	0.9115	0.4157	0.6743	0.3063	0.3063	0.922	0.4428	0.4619	0.7681	0.5586
Stegastes partitus	0.2724	0.0008	0.6224	0.4056	0.4756	0.1139	0.054	0.0483	0.0133	0.0031	0.9021	0.4559	0.2491	0.0304	0.0305	0.5913	0.4454	0.2659	0.0524	0.5238	0.0903	0.7786	0.8234	0.5731	0.1461	0.8631	0.3101	0.3081	0.1041	0.5266	0.9498	0.5654	0.9796	0.9756	0.1995	0.0762	0.1762	0.755	0.5416	0.4472	0.147	0.6105	0.2962	0.2962	0.0973	0.4599	0.4929	0.9847	0.6801
Stegastes planifrons	0.8105	0.4251	0.1908	0.186	0.9563	0.672	0.7794	0.39	0.2436	0.3487	0.6218	0.9207	0.4765	0.3534	0.3534	0.8315	0.5558	0.9	0.0815	0.1878	0.18	0.2891	0.3784	0.3829	0.9115	0.5766	0.8844	0.8884	0.2141	0.0191	0.9663	0.6796	0.145	0.4128	0.9131	0.7123	0.9021	0.6953	0.6247	0.8414	0.5008	0.9361	0.3769	0.3769	0.712	0.999	0.457	0.2355	0.6639
Stegastes variabilis	0.3293	0.0001	0.5804	0.7754	0.5914	0.4233	0.0149	0.0036	0.0153	0.0314	0.9387	0.6443	0.5659	0.0752	0.0752	0.9022	0.709	0.7035	0.2146	0.5733	0.0843	0.6834	0.4785	0.9056	0.4732	0.8679	0.6697	0.6694	0.2505	0.5527	0.9418	0.8561	0.7783	0.8082	0.7127	0.3574	0.5211	0.9039	1	0.9115	0.5651	0.7266	0.862	0.862	0.4202	0.9771	0.9428	0.7681	0.4212
Synodus intermedius	0.3651	0.6936	0.2698	0.7627	0.4552	0.2725	0.3464	0.8053	0.6704	0.2076	0.3496	0.3845	0.2502	0.6905	0.6907	0.5488	0.4804	0.7101	0.6739	0.662	0.3837	0.4043	0.6838	0.9278	0.1696	0.9108	0.8255	0.8279	0.731	0.4013	0.4676	0.875	0.1477	0.4953	0.0257	0.0228	0.0221	0.7028	0.1318	0.1001	0.0936	0.2421	0.1311	0.1311	0.0013	0.4606	0.027	0.1134	0.5429
Thalassoma bifasciatum	0.6226	0.5125	0.3638	0.3792	0.2959	0.1135	0.4162	0.6465	0.9118	0.9436	0.5449	0.6155	0.0116	0.8847	0.8846	0.9494	0.9889	0.9273	0.6227	0.0477	0.4314	0.0672	0.0645	0.6542	0.9004	0.7107	0.5641	0.563	0.284	0.8769	0.7393	0.2524	0.7175	0.2595	0.8937	0.2994	0.6737	0.8357	0.8963	0.5473	0.2378	0.2309	0.3274	0.3274	0.5668	0.7095	0.9023	0.5312	0.234
Abudefduf saxatilis 2	0.4983	0.3617	0.7912	0.3482	0.0858	0.0021	0.7728	0.5835	0.2309	0.2184	0.7239	0.0953	0.2076	0.5063	0.5066	0.3252	0.1923	0.256	0.2542	0.5391	0.3668	0.7773	0.7953	0.1825	0.0121	0.2188	0.6195	0.6116	0.161	0.5175	0.2416	0.0198	0.5264	0.07	0.1322	0.0433	0.0578	0.0077	0.732	0.1714	0.0209	0.3259	0.0273	0.0273	0.2792	0.0486	0.6088	0.804	0.3011
Acanthurus bahianus 2	0.8157	0.6094	0.2938	0.9122	0.8994	0.6294	0.8256	0.6628	0.5475	0.0355	0.6482	0.5857	0.5708	0.3443	0.3444	0.8945	0.4097	0.0389	0.2942	0.2926	0.1296	0.1	0.9413	0.8631	0.1635	0.1672	0.7249	0.7179	0.904	0.674	0.7744	0.8489	0.8644	0.7699	0.0881	0.2105	0.1353	0.3459	0.6978	0.9386	0.4281	0.9439	0.384	0.384	0.143	0.1398	0.0939	0.3999	0.5933
Acanthurus chirurgus 2	0.8847	0.6447	0.4932	0.5944	0.6852	0.3367	0.5005	0.6049	0.5599	0.9387	0.9415	0.6862	0.5542	0.773	0.7729	0.8843	0.6846	0.2802	0.545	0.6752	0.8356	0.7783	0.7814	0.831	0.4764	0.1207	0.9367	0.9288	0.8092	0.5263	0.7086	0.3983	0.8475	0.1031	0.7739	0.5505	0.5393	0.028	0.5875	0.9337	0.3995	0.6779	0.2737	0.2737	0.9692	0.3745	0.5859	0.7162	0.5367
Acanthurus coeruleus 2	0.3035	0.4487	0.0436	0.5103	0.3144	0.2663	0.6347	0.1996	0.2736	0.0572	0.4055	0.1934	0.6939	0.4835	0.4838	0.7182	0.2466	0.2781	0.7124	0.3952	0.0256	0.2078	0.2698	0.753	0.0289	0.124	0.5824	0.5897	0.8404	0.6306	0.2844	0.8127	0.6355	0.2145	0.1075	0.0819	0.0247	0.0421	0.8719	0.5161	0.2117	0.7162	0.2274	0.2274	0.1513	0.121	0.3739	0.944	0.5538
Anisotremus virginicus 2	0.5637	0.9136	0.0409	0.0161	0.6371	0.9948	0.3692	0.7282	0.6634	0.9735	0.4151	0.6867	0.8568	0.9571	0.957	0.9241	0.9295	0.8888	0.1196	0.5959	0.9017	0.6481	0.8364	0.0914	0.8399	0.8562	0.836	0.834	0.132	0.0469	0.589	0.2049	0.0489	0.8789	0.9721	0.717	0.8306	0.9733	0.8221	0.9754	0.7656	0.2537	0.7739	0.7739	0.5677	0.6056	0.4497	0.506	0.1882
Apogon townsendi 2	0.0923	0.4967	0.7895	0.7933	0.5036	0.6274	0.5076	0.4444	0.3761	0.9579	0.3903	0.42	0.2859	0.1116	0.1116	0.0591	0.502	0.5539	0.8227	0.5839	0.7667	0.3896	0.3908	0.1684	0.7833	0.4133	0.2877	0.2851	0.3277	0.1042	0.2666	0.3307	0.1064	0.4686	0.7803	0.7848	0.7459	0.7207	0.5269	0.5046	0.7934	0.7034	0.847	0.847	0.6122	0.7001	0.2778	0.8803	0.5431
Canthigaster rostrata 2	0.487	0.4801	0.9473	0.7124	0.0125	0.2937	0.8931	0.4956	0.5154	0.4398	0.6361	0.0418	0.2087	0.5565	0.5562	0.4296	0.3017	0.812	0.5814	0.9188	0.3913	0.9438	0.6663	0.7003	0.3503	0.6123	0.2969	0.3001	0.5656	0.9062	0.0333	0.5793	0.7692	0.0201	0.8596	0.3766	0.3543	0.1196	0.2358	0.7984	0.609	0.939	0.697	0.697	0.9418	0.7153	0.9869	0.5847	0.8135
Carangoides ruber 2	0.9107	0.502	0.4883	0.5849	0.9255	0.3847	0.4038	0.4075	0.411	0.9616	0.9794	0.8789	0.5551	0.8619	0.8619	0.8004	0.7908	0.1513	0.5593	0.8058	0.7612	0.9375	0.5602	0.8831	0.4883	0.0772	0.7695	0.7611	0.719	0.4415	0.8976	0.3814	0.7997	0.1687	0.6183	0.5144	0.4976	0.0438	0.833	0.8576	0.3623	0.7923	0.219	0.219	0.8018	0.3177	0.814	0.7301	0.5579
Cephalopholis cruentata 2	0.1725	0.8199	0.2454	0.6457	0.214	0.493	0.8341	0.9785	0.9357	0.5083	0.61	0.3955	0.9833	0.0958	0.0958	0.2003	0.9835	0.0086	0.9686	0.668	0.9151	0.84	0.6694	0.6617	0.4717	0.2997	0.0601	0.0588	0.9801	0.6498	0.1457	0.6572	0.6731	0.5952	0.283	0.45	0.5467	0.6104	0.2738	0.4183	0.2483	0.9694	0.1846	0.1846	0.2738	0.2726	0.9035	0.8786	0.8608
Chaetodon capistratus 2	0.0674	0.196	0.9665	0.6876	0.5556	0.4782	0.1019	0.4492	0.3073	0.1129	0.6487	0.4827	0.886	0.0071	0.0071	0.105	0.4519	0.2598	0.2223	0.828	0.2871	0.8225	0.7784	0.3183	0.4866	0.4096	0.2628	0.259	0.387	0.361	0.3004	0.5062	0.6552	0.3847	0.2878	0.307	0.3858	0.8007	0.0186	0.2127	0.3392	0.6048	0.4781	0.4781	0.1475	0.7312	0.3105	0.8345	0.4923
Chaetodon ocellatus 2	0.7425	0.3677	0.9019	0.401	0.0485	0.3382	0.8838	0.3086	0.2156	0.8051	0.8878	0.0634	0.5853	0.6911	0.6908	0.6963	0.1519	0.5592	0.5579	0.3776	0.6516	0.4539	0.2856	0.7251	0.4569	0.623	0.71	0.7082	0.2745	0.5183	0.1245	0.5701	0.8602	0.2471	0.8938	0.7518	0.8056	0.3686	0.1996	0.942	0.7323	0.8508	0.8391	0.8391	0.6798	0.6644	0.5293	0.9562	0.4171
Chaetodon striatus 2	0.5274	0.1269	0.3156	0.9641	0.575	0.6802	0.3302	0.0997	0.1271	0.0026	0.8981	0.4365	0.6126	0.2241	0.2243	0.8551	0.5057	0.4011	0.1847	0.2928	0.0088	0.1411	0.5109	0.6883	0.2146	0.5298	0.8308	0.8351	0.7577	0.9724	0.6033	0.7598	0.6693	0.9344	0.1882	0.1928	0.1364	0.7439	0.7037	0.9028	0.5719	0.9006	0.7229	0.7229	0.127	0.5003	0.1311	0.6009	0.8348
Coryphopterus glaucofraenum 2	0.4489	0.1356	0.5156	0.5949	0.1436	0.0027	0.3282	0.3903	0.2105	0.0641	0.863	0.1703	0.0669	0.3072	0.3074	0.4767	0.2788	0.1837	0.2609	0.4378	0.2723	0.7129	0.8934	0.5287	0.0285	0.2999	0.5546	0.5475	0.2432	0.8615	0.4173	0.1364	0.9803	0.1158	0.1082	0.0084	0.032	0.0591	0.6837	0.2371	0.012	0.4813	0.0283	0.0283	0.0922	0.169	0.5598	0.8137	0.9321
Coryphopterus personatus 2	0.3343	0.5535	0.8247	0.4546	0.1718	0.0065	0.3827	0.9886	0.467	0.3934	0.3497	0.1994	0.0894	0.6471	0.6473	0.1752	0.3178	0.6748	0.3822	0.4646	0.7672	0.7128	0.5394	0.1378	0.063	0.9716	0.605	0.6022	0.4222	0.9358	0.3676	0.1015	0.6473	0.2431	0.0283	0.0065	0.0281	0.3579	0.1089	0.0035	0.0021	0.0115	0.0078	0.0078	0.0146	0.2263	0.1474	0.0314	0.9699
Elacatinus xanthiprora 2	0.5391	0.5689	0.3943	0.4685	0.4087	0.0946	0.9119	0.5222	0.5918	0.6527	0.1477	0.4795	0.3756	0.612	0.6119	0.3035	0.5842	0.8524	0.3398	0.3851	0.5795	0.4668	0.6215	0.7392	0.3295	0.6127	0.9049	0.9088	0.6128	0.3791	0.5003	0.318	0.4274	0.0614	0.4025	0.1937	0.2369	0.1002	0.6434	0.1104	0.0729	0.5275	0.0495	0.0495	0.3784	0.4484	0.9135	0.0741	0.9334
Equetus punctatus 2	0.7823	0.7087	0.5804	0.9267	0.8833	0.9805	0.5866	0.6754	0.7772	0.2915	0.7168	0.6798	0.5659	0.9956	0.9956	0.6958	0.709	0.3775	0.6008	0.1052	0.4316	0.0303	0.64	0.6928	0.4654	0.3654	0.7144	0.7196	0.5904	0.4406	0.5754	0.9388	0.7027	0.6854	0.1648	0.3574	0.2163	0.6701	0.5371	0.9115	0.6943	0.6683	0.6126	0.6126	0.1861	0.4428	0.0186	0.7681	0.9183
Haemulon flavolineatum 2	0.4541	0.6922	0.5142	0.7159	0.9993	0.4253	0.8928	0.6191	0.3869	0.9748	0.5733	0.697	0.8055	0.578	0.5781	0.4639	0.2239	0.5003	0.916	0.2122	0.9064	0.3216	0.4522	0.331	0.4481	0.6737	0.2192	0.2214	0.5242	0.8679	0.8434	0.5994	0.5381	0.8557	0.667	0.8415	0.9528	0.613	0.8912	0.5544	0.4543	0.7375	0.407	0.407	0.944	0.248	0.5203	0.5797	0.2049
Haemulon macrostomum 2	0.9042	0.7087	0.5804	0.6362	0.5914	0.305	0.5866	0.6754	0.6229	0.8667	0.8875	0.6443	0.5659	0.7389	0.7388	0.8488	0.709	0.3997	0.5376	0.5733	0.8127	0.635	0.8547	0.8877	0.5049	0.1582	0.9935	0.9861	0.8947	0.6401	0.6585	0.3635	0.8371	0.088	0.8895	0.5902	0.595	0.0294	0.5371	0.9115	0.4157	0.6743	0.3063	0.3063	0.922	0.4428	0.4619	0.7681	0.5586
Haemulon plumierii 2	0.2856	0.8716	0.4355	0.8056	0.3492	0.1312	0.5135	0.8032	0.9159	0.8091	0.0801	0.3414	0.3494	0.9254	0.9252	0.2151	0.4538	0.9255	0.917	0.8639	0.9314	0.9377	0.697	0.4578	0.1853	0.8938	0.8528	0.8537	0.7379	0.5173	0.3864	0.471	0.2238	0.3032	0.067	0.0529	0.0601	0.5054	0.11	0.007	0.0421	0.09	0.0512	0.0512	0.031	0.4031	0.1747	0.0007	0.8547
Haemulon sciurus 2	0.817	0.5916	0.5826	0.9959	0.6906	0.985	0.4831	0.6891	0.8602	0.354	0.9184	0.4711	0.6803	0.8209	0.8208	0.7488	0.5308	0.5601	0.5937	0.0557	0.3853	0.0094	0.88	0.8451	0.3654	0.454	0.5268	0.5308	0.5626	0.4961	0.3492	0.9845	0.694	0.6072	0.1242	0.3576	0.1739	0.6084	0.5131	0.7676	0.6921	0.5174	0.6044	0.6044	0.192	0.3383	0.0051	0.9745	0.6623
Halichoeres bivittatus 2	0.803	0.8544	0.4501	0.5207	0.782	0.246	0.8829	0.707	0.6359	0.7807	0.8048	0.8499	0.4468	0.8852	0.8852	0.6353	0.9267	0.1941	0.6507	0.7417	0.9793	0.8377	0.6095	0.8606	0.4077	0.0604	0.8479	0.8383	0.8301	0.5535	0.8907	0.3659	0.9774	0.1396	0.5872	0.3367	0.3551	0.0437	0.9896	0.6875	0.2539	0.7335	0.1859	0.1859	0.6259	0.4238	0.7957	0.8353	0.8831
Holacanthus ciliaris 2	0.444	0.6051	0.6386	0.5145	0.2471	0.5318	0.8298	0.2341	0.0934	0.1617	0.5518	0.1264	0.6863	0.5908	0.5911	0.6178	0.2088	0.6617	0.2087	0.1439	0.0219	0.0789	0.036	0.3715	0.0457	0.2946	0.5768	0.5819	0.5298	0.3636	0.1498	0.4528	0.4386	0.57	0.2002	0.4224	0.1687	0.1558	0.7788	0.5251	0.5885	0.7437	0.6104	0.6104	0.5771	0.0597	0.1992	0.7732	0.041
Hypoplectrus nigricans 2	0.3039	0.164	0.5571	0.7818	0.3267	0.0437	0.0841	0.4103	0.2651	0.4702	0.4269	0.3755	0.1634	0.4888	0.489	0.3875	0.3646	0.9149	0.6532	0.0704	0.8564	0.1556	0.7915	0.5116	0.2954	0.4408	0.4718	0.4737	0.4326	0.9211	0.7593	0.5327	0.3874	0.5558	0.3165	0.088	0.264	0.7842	0.5298	0.1172	0.0517	0.2744	0.1177	0.1177	0.1308	0.6971	0.9289	0.0725	0.5071
Hypoplectrus puella 2	0.1692	0.5623	0.1645	0.3811	0.6313	0.0641	0.1975	0.7383	0.8158	0.4412	0.2028	0.708	0.2661	0.4731	0.4732	0.2352	0.7772	0.3914	0.7527	0.4667	0.7035	0.6117	0.6429	0.9796	0.2131	0.4271	0.7705	0.7649	0.8262	0.4324	0.9289	0.5346	0.309	0.2606	0.2087	0.0424	0.0893	0.2255	0.3551	0.1122	0.0294	0.8041	0.0423	0.0423	0.0713	0.5194	0.8404	0.207	0.4803
Lucayablennius zingaro 2	0.3293	0.0001	0.5804	0.7754	0.5914	0.4233	0.0149	0.0036	0.0153	0.0314	0.9387	0.6443	0.5659	0.0752	0.0752	0.9022	0.709	0.7035	0.2146	0.5733	0.0843	0.6834	0.4785	0.9056	0.4732	0.8679	0.6697	0.6694	0.2505	0.5527	0.9418	0.8561	0.7783	0.8082	0.7127	0.3574	0.5211	0.9039	1	0.9115	0.5651	0.7266	0.862	0.862	0.4202	0.9771	0.9428	0.7681	0.4212
Lutjanus griseus 2	0.8368	0.8635	0.1186	0.0088	0.5618	0.6505	0.4507	0.9466	0.4006	0.8766	0.5929	0.5367	0.8956	0.8165	0.8166	0.6715	0.6071	0.8848	0.0971	0.9643	0.8567	0.9489	0.6543	0.0257	0.5567	0.9108	0.5349	0.5337	0.0574	0.0386	0.6078	0.1107	0.0278	0.9245	0.7845	0.909	0.9663	0.7508	0.8192	0.7325	0.9062	0.197	0.8986	0.8986	0.6869	0.3379	0.5939	0.6852	0.0806
Malacoctenus triangulatus 2	0.7639	0.5689	0.3943	0.6694	0.6047	0.4598	0.4024	0.5222	0.5552	0.5198	0.8682	0.5037	0.3756	0.7983	0.7982	0.881	0.5694	0.1706	0.9463	0.4927	0.6875	0.3006	0.6215	0.6846	0.2761	0.0552	0.7874	0.7969	0.6118	0.339	0.442	0.5391	0.8953	0.1065	0.2577	0.2563	0.1669	0.0491	1	0.8665	0.3537	0.9951	0.2344	0.2344	0.3784	0.228	0.3678	0.654	0.6036
Microspathodon chrysurus 2	0.7087	0.4228	0.9862	0.4586	0.0059	0.0223	0.4683	0.6257	0.3388	0.1762	0.6727	0.0319	0.0852	0.9223	0.9226	0.5878	0.3423	0.9113	0.2446	0.9024	0.2372	0.7039	0.9895	0.4422	0.0397	0.4012	0.552	0.5592	0.3821	0.6638	0.035	0.1159	0.7493	0.0203	0.1184	0.0148	0.0128	0.0808	0.5343	0.1467	0.0579	0.1972	0.1073	0.1073	0.1262	0.2961	0.1612	0.5084	0.8917
Pomacanthus arcuatus 2	0.6945	0.6835	0.7891	0.2936	0.3892	0.619	0.4719	0.9042	0.5325	0.7162	0.517	0.2585	0.8133	0.9241	0.9239	0.4594	0.3497	0.9963	0.3288	0.2454	0.4706	0.1737	0.4334	0.1069	0.185	0.726	0.7561	0.7585	0.6468	0.4385	0.2148	0.2817	0.4802	0.7089	0.1797	0.5397	0.2997	0.4698	0.3362	0.2337	0.5511	0.1239	0.5067	0.5067	0.5279	0.1225	0.0629	0.53	0.0717
Pseudupeneus maculatus 2	0.6712	0.6387	0.7478	0.8121	0.4758	0.2834	0.9921	0.4344	0.8455	0.6613	0.4342	0.4076	0.2748	0.8639	0.8637	0.4448	0.503	0.7899	0.7058	0.6822	0.9391	0.4491	0.3867	0.4313	0.2314	0.9195	0.9586	0.9611	0.8191	0.5541	0.3948	0.4271	0.4411	0.4171	0.0297	0.0755	0.0654	0.6353	0.0773	0.0503	0.1022	0.0276	0.0918	0.0918	0.0222	0.3225	0.0093	0.0602	0.9962
Scarus iseri 2	0.5447	0.8693	0.1914	0.6667	0.4038	0.054	0.9223	0.9795	0.9242	0.3344	0.5748	0.3539	0.211	0.7202	0.7204	0.5055	0.3805	0.1165	0.9807	0.8311	0.5689	0.8761	0.7428	0.9257	0.0664	0.0955	0.8335	0.8241	0.9468	0.4412	0.4961	0.2771	0.7501	0.0603	0.1068	0.0378	0.0394	0.0108	0.6963	0.2883	0.0334	0.773	0.0204	0.0204	0.1271	0.1196	0.5672	0.7286	0.7361
Scomberomorus regalis 2	0.7822	0.8622	0.4988	0.202	0.2818	0.0358	0.8718	0.4087	0.9301	0.8294	0.6239	0.3599	0.2468	0.9007	0.9005	0.2047	0.4768	0.7929	0.5674	0.2567	0.5176	0.3456	0.4459	0.0264	0.2605	0.9207	0.4413	0.4391	0.2771	0.5697	0.475	0.0104	0.5991	0.2455	0.2867	0.2268	0.3445	0.2883	0.3414	0.0494	0.0596	0.0127	0.0519	0.0519	0.4363	0.2569	0.5857	0.1448	0.4863
Serranus tigrinus 2	0.4395	0.8388	0.5077	0.5918	0.7615	0.3656	0.8973	0.9374	0.4821	0.6743	0.4471	0.4529	0.661	0.704	0.7041	0.446	0.1587	0.6858	0.5849	0.6411	0.9455	0.9581	0.9935	0.2732	0.2703	0.3734	0.3986	0.4023	0.7666	0.7586	0.7843	0.6914	0.751	0.8856	0.0953	0.2734	0.3305	0.9773	0.2968	0.1315	0.1885	0.0785	0.1861	0.1861	0.1221	0.228	0.2362	0.0741	0.5736
Serranus tortugarum 2	0.2315	0.0201	0.2591	0.8571	0.6628	0.1685	0.0558	0.0577	0.1071	0.1132	0.7491	0.6709	0.4347	0.111	0.111	0.6165	0.5724	0.3616	0.5842	0.2494	0.2743	0.371	0.6968	0.9238	0.3187	0.8322	0.4462	0.4446	0.4368	0.9784	0.8408	0.8742	0.7103	0.7985	0.558	0.2099	0.3809	0.5695	1	0.6414	0.2269	0.7029	0.3607	0.3607	0.3272	0.6974	0.6452	0.9428	0.5623
Sparisoma aurofrenatum 2	0.6006	0.9172	0.1314	0.406	0.1055	0.6185	0.5559	0.8282	0.9827	0.7863	0.9993	0.3856	0.3665	0.3626	0.3625	0.9396	0.7937	0.0675	0.6486	0.9446	0.8789	0.7916	0.6675	0.6407	0.9292	0.5869	0.2596	0.2597	0.5731	0.4283	0.1805	0.5107	0.6503	0.3157	0.8216	0.7336	0.7922	0.8948	0.8272	0.5978	0.895	0.2732	0.913	0.913	0.9878	0.4436	0.6504	0.4507	0.4731
Sparisoma viride 2	0.3932	0.2337	0.023	0.3449	0.7191	0.3812	0.3609	0.1639	0.3589	0.089	0.7191	0.548	0.5463	0.3246	0.3248	0.9818	0.3987	0.2007	0.9341	0.9435	0.1541	0.7775	0.6012	0.3806	0.2212	0.4083	0.926	0.9216	0.8268	0.3678	0.8593	0.7513	0.43	0.5256	0.3291	0.1776	0.1858	0.2787	0.8417	0.8872	0.31	0.4152	0.3522	0.3522	0.2175	0.4356	0.9237	0.8243	0.824
Stegastes adustus 2	0.3109	0.7104	0.5105	0.2439	0.3261	0.813	0.3649	0.7401	0.5623	0.5126	0.1684	0.3302	0.7872	0.8904	0.8903	0.4088	0.5255	0.6367	0.2627	0.6912	0.4529	0.6222	0.5414	0.8605	0.5909	0.3255	0.8303	0.836	0.2673	0.3458	0.3142	0.4408	0.172	0.407	0.8826	0.934	0.9296	0.2489	0.2215	0.3413	0.7948	0.8025	0.8279	0.8279	0.4641	0.4899	0.9973	0.0351	0.1965
Stegastes diencaeus 2	0.9042	0.7087	0.5804	0.6362	0.5914	0.305	0.5866	0.6754	0.6229	0.8667	0.8875	0.6443	0.5659	0.7389	0.7388	0.8488	0.709	0.3997	0.5376	0.5733	0.8127	0.635	0.8547	0.8877	0.5049	0.1582	0.9935	0.9861	0.8947	0.6401	0.6585	0.3635	0.8371	0.088	0.8895	0.5902	0.595	0.0294	0.5371	0.9115	0.4157	0.6743	0.3063	0.3063	0.922	0.4428	0.4619	0.7681	0.5586
Stegastes partitus 2	0.1214	0.0307	0.5714	0.3957	0.5534	0.0394	0.114	0.1894	0.0436	0.0071	0.7487	0.4901	0.2512	0.0202	0.0202	0.2258	0.4368	0.1254	0.0622	0.6314	0.1337	0.9306	0.9972	0.2574	0.0471	0.5946	0.2019	0.1991	0.14	0.5629	0.9801	0.272	0.8615	0.8897	0.0384	0.0178	0.0565	0.5292	0.1652	0.1194	0.0275	0.2896	0.0743	0.0743	0.0163	0.192	0.2275	0.6403	0.9151
Stegastes planifrons 2	0.7968	0.4358	0.1276	0.1226	0.8557	0.8152	0.7957	0.44	0.2358	0.4071	0.6598	0.9842	0.5246	0.3739	0.374	0.7164	0.576	0.8722	0.0696	0.2676	0.2283	0.3955	0.4024	0.2498	0.8555	0.5678	0.942	0.9463	0.1441	0.0061	0.9092	0.493	0.0992	0.4948	0.9171	0.7475	0.916	0.7889	0.5925	0.9644	0.5902	0.7978	0.4572	0.4572	0.6809	0.9401	0.498	0.2912	0.5873
Synodus intermedius 2	0.3118	0.4817	0.2534	0.8026	0.4273	0.2401	0.2278	0.5968	0.4959	0.1295	0.3777	0.3673	0.2338	0.5466	0.5467	0.5538	0.4652	0.6821	0.5698	0.7333	0.2846	0.461	0.7693	0.9438	0.152	0.9326	0.8786	0.881	0.8581	0.4743	0.4936	0.8999	0.1535	0.5369	0.0289	0.0174	0.0207	0.7272	0.1522	0.1139	0.0886	0.2894	0.1426	0.1426	0.0009	0.4827	0.04	0.1478	0.4859
Thalassoma bifasciatum 2	0.6627	0.5357	0.4357	0.2587	0.1478	0.0371	0.6097	0.6906	0.9083	0.9008	0.6364	0.336	0.0113	0.8418	0.8417	0.8469	0.6127	0.9425	0.5244	0.0397	0.5132	0.0774	0.1655	0.4286	0.5732	0.8198	0.5323	0.5307	0.191	0.7877	0.4843	0.11	0.9224	0.1299	0.6955	0.2146	0.508	0.4787	0.9808	0.4226	0.1307	0.1491	0.1779	0.1779	0.5505	0.875	0.9456	0.498	0.6151
[truncated: 121 more columns]

## Sheet: Corr Env Fish
Correlations
	Hard coral reef	Hard coral bleached	Recently killed coral	Anemone	Soft coral reef	Sponges	Worms	Zoanthid	Rubble	Sand reef	Rock	Calcifying algae reef	Macroalgae reef	Soft Substrate	Hard substrate	Thalassia	Syringodium	Sand seagrass	Hard coral seagrass	Soft coral seagrass	Sponge seagrass	Macroalgae seagrass	Calcifying algae seagrass	Seagrass Biomass (g/m2)	Distance Reef-Mangrove (m)	Temp °C reef	Sal psu reef	TDS mg/L reef	ODO mg/L reef	pH reef	Turbidity FNU reef	Chlorophyll µg/L reef	BGA-PE µg/L reef	fDOM RFU reef	Reef Biodiversity M1	Reef Biodiversity M2	Mangrove M1	Mangrove M2	Seagrass M1	Seagrass M2	Trophic level (Fish Base)	Trophic level Avg all species	Vulnerability (Fish Base)	Vulnerability (Fish Base)/10	Resilience high (No of species, Fish Base)	Resilience medium	Resilience low	Resilience very low	Resilience high %
Hard coral reef	1	-0.3484	0.3768	0.2089	-0.145	-0.3574	-0.5931	-0.4783	-0.4781	-0.3856	-0.7803	-0.1386	-0.2827	-0.7206	0.7206	-0.8589	-0.1268	-0.2852	-0.0877	-0.1165	-0.4959	-0.086	-0.3841	-0.4044	0.4652	-0.3894	-0.1888	-0.1916	0.073	0.2598	-0.2495	-0.2335	-0.0709	0.1796	-0.418	-0.3833	-0.4255	-0.2084	-0.7025	-0.6908	-0.4527	-0.0055	-0.3874	-0.3874	-0.4523	-0.3267	-0.1384	-0.391	0.0333
Hard coral bleached	-0.3484	1	-0.0416	0.3743	-0.2849	0.4194	0.7468	0.8349	0.8728	0.7739	-0.1392	-0.2459	-0.3041	0.6961	-0.696	0.0966	-0.1994	0.2061	0.6774	-0.2986	0.6166	-0.2251	0.2456	0.1624	-0.35	-0.0733	0.3066	0.3069	-0.6754	-0.4297	0.0026	0.1128	0.0727	-0.1052	0.1968	0.3961	0.2674	-0.0342	0.0458	0.0974	0.2928	0.0321	0.1242	0.1242	0.3212	0.0724	0.0345	-0.158	0.22
Recently killed coral	0.3768	-0.0416	1	0.655	0.0155	-0.1193	-0.0923	-0.3281	-0.1361	-0.3003	-0.4625	0.2298	-0.0427	-0.1037	0.1037	-0.0249	0.4568	-0.3151	0.3245	-0.1555	-0.3694	-0.3071	-0.3532	0.4222	0.4135	-0.1369	0.1421	0.1421	-0.5181	-0.668	0.1194	0.3636	0.5185	-0.18	-0.4303	-0.3695	-0.4535	-0.3503	0.0452	-0.1357	-0.2971	0.3072	-0.3351	-0.3351	-0.4578	-0.3772	-0.1048	-0.232	0.1017
Anemone	0.2089	0.3743	0.655	1	-0.3361	0.38	-0.0685	0.0201	0.4242	0.3095	-0.5175	-0.3072	-0.3835	0.2286	-0.2285	0.0365	-0.2515	0.1868	0.8496	-0.2555	0.067	-0.1788	-0.1588	0.6933	-0.2538	-0.0805	0.4638	0.4643	-0.8978	-0.6694	-0.1744	0.6273	0.6157	0.0048	0.2069	0.1845	0.0826	0.0201	0.1028	0.1197	0.2236	0.6549	0.1757	0.1757	0.0669	0.2874	0.3112	-0.1992	-0.2976
Soft coral reef	-0.145	-0.2849	0.0155	-0.3361	1	-0.6225	-0.123	-0.242	-0.3926	-0.3526	-0.0201	0.9378	0.6189	0.2651	-0.2654	0.1278	0.6317	0.2058	-0.3759	0.067	-0.3528	-0.0626	-0.1538	-0.1403	0.591	0.0145	0.3894	0.388	0.3166	0.0738	0.9258	-0.3802	0.2347	-0.8203	-0.3892	-0.6032	-0.6113	-0.5505	0.1621	-0.2822	-0.4722	-0.4318	-0.4032	-0.4032	-0.339	-0.3251	-0.3516	-0.2254	0.1665
Sponges	-0.3574	0.4194	-0.1193	0.38	-0.6225	1	0.3222	0.1563	0.4377	0.4997	0.2221	-0.5873	-0.6913	0.3143	-0.3141	0.4864	-0.4837	0.4095	0.461	-0.4069	0.2561	-0.2448	-0.1453	0.5607	-0.8031	0.2811	0.3106	0.3141	-0.5251	-0.1532	-0.3952	0.7696	0.0359	0.618	0.7079	0.8838	0.7784	0.6634	0.3756	0.7371	0.9476	0.6305	0.8977	0.8977	0.6891	0.6184	0.3572	0.4163	-0.1426
Worms	-0.5931	0.7468	-0.0923	-0.0685	-0.123	0.3222	1	0.6555	0.5473	0.4534	0.3252	0.0379	-0.1707	0.5666	-0.5665	0.3622	0.2161	-0.128	0.2216	-0.2432	0.4076	-0.2906	0.0937	0.0446	-0.129	-0.106	0.0501	0.0504	-0.2637	-0.2529	0.1488	-0.0263	-0.3009	-0.1182	0.0749	0.356	0.2348	-0.194	0.3523	0.3504	0.279	-0.0328	0.0942	0.0942	0.3629	-0.2639	-0.0507	0.2905	0.6283
Zoanthid	-0.4783	0.8349	-0.3281	0.0201	-0.242	0.1563	0.6555	1	0.8827	0.6855	0.1595	-0.2656	0.1106	0.5755	-0.5754	0.0693	-0.2232	0.0301	0.4075	0.0668	0.8115	0.0957	0.7049	-0.0524	-0.3457	0.0007	-0.0665	-0.0664	-0.3273	-0.3196	-0.1026	-0.1694	-0.0358	-0.1343	0.1063	0.2132	0.2316	0.0363	-0.0811	0	0.0638	-0.3076	-0.0819	-0.0819	0.1619	0.0865	-0.0432	-0.1768	0.0269
Rubble	-0.4781	0.8728	-0.1361	0.4242	-0.3926	0.4377	0.5473	0.8827	1	0.7981	0.0773	-0.4384	-0.0909	0.6633	-0.6632	0.2317	-0.4093	0.2154	0.7325	-0.0295	0.7978	0.0648	0.5775	0.3598	-0.5909	0.0449	0.1852	0.1861	-0.653	-0.5224	-0.2097	0.22	0.2173	-0.0498	0.3804	0.4246	0.4127	0.1725	0.1188	0.2459	0.3329	0.122	0.1965	0.1965	0.3428	0.3836	0.2212	-0.091	-0.2029
Sand reef	-0.3856	0.7739	-0.3003	0.3095	-0.3526	0.4997	0.4534	0.6855	0.7981	1	-0.0607	-0.4311	-0.3493	0.6796	-0.6795	0.1431	-0.4116	0.5336	0.7525	0.1509	0.8504	0.3254	0.265	0.1818	-0.7061	0.324	0.2045	0.2076	-0.4897	-0.2281	-0.2192	0.2262	0.0792	0.1051	0.6478	0.6754	0.6731	0.3149	0.2444	0.253	0.4976	0.163	0.3983	0.3983	0.6546	0.5054	0.5445	-0.1797	-0.0816
Rock	-0.7803	-0.1392	-0.4625	-0.5175	-0.0201	0.2221	0.3252	0.1595	0.0773	-0.0607	1	-0.0088	0.3301	0.1292	-0.1291	0.7043	0.0698	-0.1249	-0.3781	0.224	0.2175	0.1608	0.3779	0.1803	-0.3364	0.2499	-0.2771	-0.2755	0.3797	0.0817	-0.0619	0.0832	-0.2745	0.132	0.2943	0.2704	0.3871	0.2962	0.5299	0.6831	0.3415	-0.0097	0.3309	0.3309	0.3096	0.2082	0.0785	0.6824	-0.065
Calcifying algae reef	-0.1386	-0.2459	0.2298	-0.3072	0.9378	-0.5873	0.0379	-0.2656	-0.4384	-0.4311	-0.0088	1	0.562	0.2348	-0.235	0.1851	0.8497	0.0264	-0.3902	-0.0014	-0.4179	-0.2032	-0.2541	-0.11	0.7019	0.0251	0.3041	0.3033	0.2481	-0.0716	0.9296	-0.2986	0.2212	-0.7613	-0.5393	-0.6311	-0.671	-0.5987	0.2053	-0.2481	-0.4987	-0.4268	-0.4677	-0.4677	-0.4239	-0.5303	-0.4506	-0.1945	0.3671
Macroalgae reef	-0.2827	-0.3041	-0.0427	-0.3835	0.6189	-0.6913	-0.1707	0.1106	-0.0909	-0.3493	0.3301	0.562	1	0.0875	-0.0877	0.165	0.455	-0.1872	-0.3803	0.4978	0.0592	0.303	0.5823	-0.0849	0.3807	0.126	-0.1876	-0.1884	0.364	-0.1948	0.4317	-0.3873	0.2961	-0.613	-0.4521	-0.7022	-0.518	-0.275	-0.007	-0.2578	-0.6411	-0.6012	-0.5958	-0.5958	-0.5714	-0.1927	-0.3542	-0.2406	-0.2592
Soft Substrate	-0.7206	0.6961	-0.1037	0.2286	0.2651	0.3143	0.5666	0.5755	0.6633	0.6796	0.1292	0.2348	0.0875	1	-1	0.5775	0.118	0.6076	0.5485	-0.0563	0.5446	-0.0311	0.1894	0.4307	-0.3672	0.3484	0.6112	0.6139	-0.5212	-0.4838	0.4712	0.269	0.414	-0.4341	0.344	0.3081	0.2481	0.0073	0.5246	0.3331	0.3394	0.0109	0.2519	0.2519	0.379	0.2974	0.1357	-0.1411	0.0118
Hard substrate	0.7206	-0.696	0.1037	-0.2285	-0.2654	-0.3141	-0.5665	-0.5754	-0.6632	-0.6795	-0.1291	-0.235	-0.0877	-1	1	-0.5775	-0.1182	-0.6076	-0.5484	0.0563	-0.5444	0.0311	-0.1893	-0.4307	0.367	-0.3484	-0.6113	-0.6139	0.5211	0.4838	-0.4714	-0.2689	-0.4141	0.4343	-0.3438	-0.3079	-0.2479	-0.0071	-0.5246	-0.333	-0.3393	-0.0108	-0.2518	-0.2518	-0.3788	-0.2972	-0.1356	0.1411	-0.0119
Thalassia	-0.8589	0.0966	-0.0249	0.0365	0.1278	0.4864	0.3622	0.0693	0.2317	0.1431	0.7043	0.1851	0.165	0.5775	-0.5775	1	0.2289	0.306	0.112	-0.0101	0.1743	-0.0675	0.0762	0.7146	-0.4317	0.4759	0.3296	0.3334	-0.2115	-0.4037	0.2481	0.6009	0.3094	-0.0577	0.4163	0.3705	0.3807	0.2987	0.84	0.8392	0.5531	0.3119	0.5297	0.5297	0.3808	0.3849	0.1737	0.4712	-0.1418
Syringodium	-0.1268	-0.1994	0.4568	-0.2515	0.6317	-0.4837	0.2161	-0.2232	-0.4093	-0.4116	0.0698	0.8497	0.455	0.118	-0.1182	0.2289	1	-0.2659	-0.3255	0.1277	-0.3014	-0.145	-0.2376	-0.0713	0.6705	0.1393	-0.0302	-0.0293	0.1794	-0.2755	0.6592	-0.1508	0.1524	-0.4992	-0.5996	-0.5426	-0.555	-0.4977	0.2639	-0.1459	-0.4829	-0.3695	-0.5079	-0.5079	-0.4454	-0.6756	-0.3798	-0.1461	0.5123
Sand seagrass	-0.2852	0.2061	-0.3151	0.1868	0.2058	0.4095	-0.128	0.0301	0.2154	0.5336	-0.1249	0.0264	-0.1872	0.6076	-0.6076	0.306	-0.2659	1	0.3754	-0.0615	0.2486	0.1133	-0.1262	0.3042	-0.5244	0.5585	0.6925	0.6963	-0.2869	0.0162	0.2617	0.4	0.424	-0.0315	0.5891	0.4345	0.404	0.4305	0.2887	0.2193	0.5125	0.1435	0.5782	0.5782	0.4669	0.6981	0.2958	-0.2425	-0.3641
Hard coral seagrass	-0.0877	0.6774	0.3245	0.8496	-0.3759	0.461	0.2216	0.4075	0.7325	0.7525	-0.3781	-0.3902	-0.3803	0.5485	-0.5484	0.112	-0.3255	0.3754	1	-0.0229	0.5354	0.1023	0.0682	0.5733	-0.512	0.119	0.3988	0.4008	-0.8719	-0.6319	-0.2035	0.5154	0.4837	-0.0132	0.4561	0.439	0.382	0.1184	0.2348	0.2006	0.3561	0.5086	0.262	0.262	0.3687	0.4221	0.5206	-0.2578	-0.2269
Soft coral seagrass	-0.1165	-0.2986	-0.1555	-0.2555	0.067	-0.4069	-0.2432	0.0668	-0.0295	0.1509	0.224	-0.0014	0.4978	-0.0563	0.0563	-0.0101	0.1277	-0.0615	-0.0229	1	0.4941	0.951	0.4613	-0.1531	-0.1106	0.4593	-0.567	-0.5642	0.3918	-0.026	-0.2136	-0.2065	0.0435	-0.0547	0.1299	-0.114	0.1688	0.1213	0.1626	-0.0714	-0.3016	-0.2516	-0.2649	-0.2649	-0.0079	0.1433	0.4618	-0.2362	-0.2956
Sponge seagrass	-0.4959	0.6166	-0.3694	0.067	-0.3528	0.2561	0.4076	0.8115	0.7978	0.8504	0.2175	-0.4179	0.0592	0.5446	-0.5444	0.1743	-0.3014	0.2486	0.5354	0.4941	1	0.5734	0.6786	0.0767	-0.6416	0.4165	-0.1941	-0.1908	-0.2522	-0.2979	-0.3314	0.0607	0.0639	0.0905	0.4638	0.4459	0.5791	0.358	0.1629	0.1856	0.2369	-0.1199	0.1411	0.1411	0.4054	0.4276	0.4307	-0.207	-0.2293
Macroalgae seagrass	-0.086	-0.2251	-0.3071	-0.1788	-0.0626	-0.2448	-0.2906	0.0957	0.0648	0.3254	0.1608	-0.2032	0.303	-0.0311	0.0311	-0.0675	-0.145	0.1133	0.1023	0.951	0.5734	1	0.4291	-0.1384	-0.3153	0.4466	-0.4769	-0.4741	0.3367	0.0979	-0.3415	-0.1556	-0.0116	0.0631	0.3657	0.0983	0.3665	0.2463	0.1492	-0.0116	-0.1119	-0.1114	-0.065	-0.065	0.2065	0.3555	0.6343	-0.1999	-0.3884
Calcifying algae seagrass	-0.3841	0.2456	-0.3532	-0.1588	-0.1538	-0.1453	0.0937	0.7049	0.5775	0.265	0.3779	-0.2541	0.5823	0.1894	-0.1893	0.0762	-0.2376	-0.1262	0.0682	0.4613	0.6786	0.4291	1	-0.0314	-0.2834	0.1602	-0.3806	-0.3803	0.0241	-0.2633	-0.2507	-0.1989	0.1334	-0.0821	-0.0132	-0.1208	0.0793	0.2191	-0.1937	-0.0739	-0.2047	-0.4335	-0.2408	-0.2408	-0.181	0.2358	-0.0846	-0.197	-0.4836
Seagrass Biomass (g/m2)	-0.4044	0.1624	0.4222	0.6933	-0.1403	0.5607	0.0446	-0.0524	0.3598	0.1818	0.1803	-0.11	-0.0849	0.4307	-0.4307	0.7146	-0.0713	0.3042	0.5733	-0.1531	0.0767	-0.1384	-0.0314	1	-0.4686	0.2528	0.5089	0.5116	-0.6848	-0.6878	0.0016	0.8579	0.6547	-0.0041	0.43	0.328	0.2928	0.2617	0.625	0.675	0.5136	0.7022	0.4966	0.4966	0.2554	0.5216	0.3333	0.2465	-0.4339
Distance Reef-Mangrove (m)	0.4652	-0.35	0.4135	-0.2538	0.591	-0.8031	-0.129	-0.3457	-0.5909	-0.7061	-0.3364	0.7019	0.3807	-0.3672	0.367	-0.4317	0.6705	-0.5244	-0.512	-0.1106	-0.6416	-0.3153	-0.2834	-0.4686	1	-0.4745	-0.1047	-0.1089	0.3404	0.0971	0.535	-0.5912	-0.086	-0.5386	-0.893	-0.8626	-0.922	-0.7866	-0.3638	-0.6612	-0.8276	-0.4631	-0.8115	-0.8115	-0.7432	-0.8876	-0.6203	-0.2478	0.4948
Temp °C reef	-0.3894	-0.0733	-0.1369	-0.0805	0.0145	0.2811	-0.106	0.0007	0.0449	0.324	0.2499	0.0251	0.126	0.3484	-0.3484	0.4759	0.1393	0.5585	0.119	0.4593	0.4165	0.4466	0.1602	0.2528	-0.4745	1	-0.0006	0.0067	-0.0347	-0.2166	-0.0262	0.49	0.4212	0.2727	0.3519	0.2913	0.4366	0.6925	0.352	0.2881	0.3046	-0.1143	0.356	0.356	0.1852	0.512	0.2443	-0.268	-0.3801
Sal psu reef	-0.1888	0.3066	0.1421	0.4638	0.3894	0.3106	0.0501	-0.0665	0.1852	0.2045	-0.2771	0.3041	-0.1876	0.6112	-0.6113	0.3296	-0.0302	0.6925	0.3988	-0.567	-0.1941	-0.4769	-0.3806	0.5089	-0.1047	-0.0006	1	1	-0.5529	-0.2295	0.5892	0.3869	0.5097	-0.4021	0.2259	0.1376	-0.0555	-0.1108	0.3002	0.1826	0.3433	0.33	0.3584	0.3584	0.2093	0.2877	-0.0311	-0.0706	-0.0778
TDS mg/L reef	-0.1916	0.3069	0.1421	0.4643	0.388	0.3141	0.0504	-0.0664	0.1861	0.2076	-0.2755	0.3033	-0.1884	0.6139	-0.6139	0.3334	-0.0293	0.6963	0.4008	-0.5642	-0.1908	-0.4741	-0.3803	0.5116	-0.1089	0.0067	1	1	-0.5544	-0.2319	0.5881	0.3917	0.5125	-0.399	0.2291	0.141	-0.0513	-0.1054	0.3035	0.1857	0.3467	0.3306	0.3619	0.3619	0.2117	0.2914	-0.0284	-0.0719	-0.0797
ODO mg/L reef	0.073	-0.6754	-0.5181	-0.8978	0.3166	-0.5251	-0.2637	-0.3273	-0.653	-0.4897	0.3797	0.2481	0.364	-0.5212	0.5211	-0.2115	0.1794	-0.2869	-0.8719	0.3918	-0.2522	0.3367	0.0241	-0.6848	0.3404	-0.0347	-0.5529	-0.5544	1	0.768	0.043	-0.6453	-0.616	0.0248	-0.1908	-0.2802	-0.1412	-0.0916	-0.1366	-0.1898	-0.3317	-0.4698	-0.2346	-0.2346	-0.1162	-0.2711	-0.1218	0.2254	0.1745
pH reef	0.2598	-0.4297	-0.668	-0.6694	0.0738	-0.1532	-0.2529	-0.3196	-0.5224	-0.2281	0.0817	-0.0716	-0.1948	-0.4838	0.4838	-0.4037	-0.2755	0.0162	-0.6319	-0.026	-0.2979	0.0979	-0.2633	-0.6878	0.0971	-0.2166	-0.2295	-0.2319	0.768	1	-0.0947	-0.5286	-0.7481	0.2479	0.1114	0.0969	0.1021	0.0319	-0.2663	-0.1558	0.0391	-0.1801	0.1344	0.1344	0.2256	-0.0435	0.0111	0.2811	0.209
Turbidity FNU reef	-0.2495	0.0026	0.1194	-0.1744	0.9258	-0.3952	0.1488	-0.1026	-0.2097	-0.2192	-0.0619	0.9296	0.4317	0.4712	-0.4714	0.2481	0.6592	0.2617	-0.2035	-0.2136	-0.3314	-0.3415	-0.2507	0.0016	0.535	-0.0262	0.5892	0.5881	0.043	-0.0947	1	-0.2203	0.2829	-0.8163	-0.3738	-0.4658	-0.5692	-0.5662	0.2333	-0.1709	-0.3045	-0.3341	-0.2894	-0.2894	-0.2545	-0.3607	-0.433	-0.1853	0.3232
Chlorophyll µg/L reef	-0.2335	0.1128	0.3636	0.6273	-0.3802	0.7696	-0.0263	-0.1694	0.22	0.2262	0.0832	-0.2986	-0.3873	0.269	-0.2689	0.6009	-0.1508	0.4	0.5154	-0.2065	0.0607	-0.1556	-0.1989	0.8579	-0.5912	0.49	0.3869	0.3917	-0.6453	-0.5286	-0.2203	1	0.5541	0.4184	0.4899	0.5254	0.4798	0.5975	0.4776	0.65	0.6796	0.6763	0.6815	0.6815	0.3218	0.5899	0.3282	0.1649	-0.3967
BGA-PE µg/L reef	-0.0709	0.0727	0.5185	0.6157	0.2347	0.0359	-0.3009	-0.0358	0.2173	0.0792	-0.2745	0.2212	0.2961	0.414	-0.4141	0.3094	0.1524	0.424	0.4837	0.0435	0.0639	-0.0116	0.1334	0.6547	-0.086	0.4212	0.5097	0.5125	-0.616	-0.7481	0.2829	0.5541	1	-0.3025	-0.051	-0.2325	-0.2074	0.1355	0.133	-0.0268	-0.0737	0.1034	-0.0366	-0.0366	-0.32	0.3309	-0.0497	-0.5214	-0.5787
fDOM RFU reef	0.1796	-0.1052	-0.18	0.0048	-0.8203	0.618	-0.1182	-0.1343	-0.0498	0.1051	0.132	-0.7613	-0.613	-0.4341	0.4343	-0.0577	-0.4992	-0.0315	-0.0132	-0.0547	0.0905	0.0631	-0.0821	-0.0041	-0.5386	0.2727	-0.4021	-0.399	0.0248	0.2479	-0.8163	0.4184	-0.3025	1	0.3878	0.5972	0.6265	0.7778	-0.1414	0.3077	0.5411	0.3059	0.5592	0.5592	0.3264	0.3741	0.2483	0.2657	-0.1728
Reef Biodiversity M1	-0.418	0.1968	-0.4303	0.2069	-0.3892	0.7079	0.0749	0.1063	0.3804	0.6478	0.2943	-0.5393	-0.4521	0.344	-0.3438	0.4163	-0.5996	0.5891	0.4561	0.1299	0.4638	0.3657	-0.0132	0.43	-0.893	0.3519	0.2259	0.2291	-0.1908	0.1114	-0.3738	0.4899	-0.051	0.3878	1	0.8873	0.9172	0.5705	0.5581	0.7145	0.8489	0.6199	0.8567	0.8567	0.9171	0.8332	0.8175	0.3974	-0.3307
Reef Biodiversity M2	-0.3833	0.3961	-0.3695	0.1845	-0.6032	0.8838	0.356	0.2132	0.4246	0.6754	0.2704	-0.6311	-0.7022	0.3081	-0.3079	0.3705	-0.5426	0.4345	0.439	-0.114	0.4459	0.0983	-0.1208	0.328	-0.8626	0.2913	0.1376	0.141	-0.2802	0.0969	-0.4658	0.5254	-0.2325	0.5972	0.8873	1	0.9516	0.604	0.4554	0.7218	0.937	0.5839	0.8861	0.8861	0.9226	0.6341	0.6446	0.4523	-0.0362
Mangrove M1	-0.4255	0.2674	-0.4535	0.0826	-0.6113	0.7784	0.2348	0.2316	0.4127	0.6731	0.3871	-0.671	-0.518	0.2481	-0.2479	0.3807	-0.555	0.404	0.382	0.1688	0.5791	0.3665	0.0793	0.2928	-0.922	0.4366	-0.0555	-0.0513	-0.1412	0.1021	-0.5692	0.4798	-0.2074	0.6265	0.9172	0.9516	1	0.7066	0.4577	0.709	0.8541	0.4892	0.8254	0.8254	0.8813	0.7209	0.7311	0.402	-0.2055
Mangrove M2	-0.2084	-0.0342	-0.3503	0.0201	-0.5505	0.6634	-0.194	0.0363	0.1725	0.3149	0.2962	-0.5987	-0.275	0.0073	-0.0071	0.2987	-0.4977	0.4305	0.1184	0.1213	0.358	0.2463	0.2191	0.2617	-0.7866	0.6925	-0.1108	-0.1054	-0.0916	0.0319	-0.5662	0.5975	0.1355	0.7778	0.5705	0.604	0.7066	1	0.0619	0.4271	0.6299	0.176	0.6859	0.6859	0.3582	0.7638	0.2698	0.0642	-0.5749
Seagrass M1	-0.7025	0.0458	0.0452	0.1028	0.1621	0.3756	0.3523	-0.0811	0.1188	0.2444	0.5299	0.2053	-0.007	0.5246	-0.5246	0.84	0.2639	0.2887	0.2348	0.1626	0.1629	0.1492	-0.1937	0.625	-0.3638	0.352	0.3002	0.3035	-0.1366	-0.2663	0.2333	0.4776	0.133	-0.1414	0.5581	0.4554	0.4577	0.0619	1	0.8238	0.5305	0.5106	0.4995	0.4995	0.6017	0.2946	0.5465	0.5162	0.0727
Seagrass M2	-0.6908	0.0974	-0.1357	0.1197	-0.2822	0.7371	0.3504	0	0.2459	0.253	0.6831	-0.2481	-0.2578	0.3331	-0.333	0.8392	-0.1459	0.2193	0.2006	-0.0714	0.1856	-0.0116	-0.0739	0.675	-0.6612	0.2881	0.1826	0.1857	-0.1898	-0.1558	-0.1709	0.65	-0.0268	0.3077	0.7145	0.7218	0.709	0.4271	0.8238	1	0.826	0.6544	0.7934	0.7934	0.712	0.5176	0.4964	0.7559	-0.1007
Trophic level (Fish Base)	-0.4527	0.2928	-0.2971	0.2236	-0.4722	0.9476	0.279	0.0638	0.3329	0.4976	0.3415	-0.4987	-0.6411	0.3394	-0.3393	0.5531	-0.4829	0.5125	0.3561	-0.3016	0.2369	-0.1119	-0.2047	0.5136	-0.8276	0.3046	0.3433	0.3467	-0.3317	0.0391	-0.3045	0.6796	-0.0737	0.5411	0.8489	0.937	0.8541	0.6299	0.5305	0.826	1	0.6535	0.9785	0.9785	0.8465	0.6863	0.497	0.5414	-0.1275
Trophic level Avg all species	-0.0055	0.0321	0.3072	0.6549	-0.4318	0.6305	-0.0328	-0.3076	0.122	0.163	-0.0097	-0.4268	-0.6012	0.0109	-0.0108	0.3119	-0.3695	0.1435	0.5086	-0.2516	-0.1199	-0.1114	-0.4335	0.7022	-0.4631	-0.1143	0.33	0.3306	-0.4698	-0.1801	-0.3341	0.6763	0.1034	0.3059	0.6199	0.5839	0.4892	0.176	0.5106	0.6544	0.6535	1	0.6431	0.6431	0.5668	0.4374	0.641	0.5267	-0.1553
Vulnerability (Fish Base)	-0.3874	0.1242	-0.3351	0.1757	-0.4032	0.8977	0.0942	-0.0819	0.1965	0.3983	0.3309	-0.4677	-0.5958	0.2519	-0.2518	0.5297	-0.5079	0.5782	0.262	-0.2649	0.1411	-0.065	-0.2408	0.4966	-0.8115	0.356	0.3584	0.3619	-0.2346	0.1344	-0.2894	0.6815	-0.0366	0.5592	0.8567	0.8861	0.8254	0.6859	0.4995	0.7934	0.9785	0.6431	1	1	0.8067	0.7536	0.4952	0.5212	-0.2372
Vulnerability (Fish Base)/10	-0.3874	0.1242	-0.3351	0.1757	-0.4032	0.8977	0.0942	-0.0819	0.1965	0.3983	0.3309	-0.4677	-0.5958	0.2519	-0.2518	0.5297	-0.5079	0.5782	0.262	-0.2649	0.1411	-0.065	-0.2408	0.4966	-0.8115	0.356	0.3584	0.3619	-0.2346	0.1344	-0.2894	0.6815	-0.0366	0.5592	0.8567	0.8861	0.8254	0.6859	0.4995	0.7934	0.9785	0.6431	1	1	0.8067	0.7536	0.4952	0.5212	-0.2372
Resilience high (No of species, Fish Base)	-0.4523	0.3212	-0.4578	0.0669	-0.339	0.6891	0.3629	0.1619	0.3428	0.6546	0.3096	-0.4239	-0.5714	0.379	-0.3788	0.3808	-0.4454	0.4669	0.3687	-0.0079	0.4054	0.2065	-0.181	0.2554	-0.7432	0.1852	0.2093	0.2117	-0.1162	0.2256	-0.2545	0.3218	-0.32	0.3264	0.9171	0.9226	0.8813	0.3582	0.6017	0.712	0.8465	0.5668	0.8067	0.8067	1	0.564	0.7451	0.5204	0.0671
Resilience medium	-0.3267	0.0724	-0.3772	0.2874	-0.3251	0.6184	-0.2639	0.0865	0.3836	0.5054	0.2082	-0.5303	-0.1927	0.2974	-0.2972	0.3849	-0.6756	0.6981	0.4221	0.1433	0.4276	0.3555	0.2358	0.5216	-0.8876	0.512	0.2877	0.2914	-0.2711	-0.0435	-0.3607	0.5899	0.3309	0.3741	0.8332	0.6341	0.7209	0.7638	0.2946	0.5176	0.6863	0.4374	0.7536	0.7536	0.564	1	0.5617	0.0978	-0.7639
Resilience low	-0.1384	0.0345	-0.1048	0.3112	-0.3516	0.3572	-0.0507	-0.0432	0.2212	0.5445	0.0785	-0.4506	-0.3542	0.1357	-0.1356	0.1737	-0.3798	0.2958	0.5206	0.4618	0.4307	0.6343	-0.0846	0.3333	-0.6203	0.2443	-0.0311	-0.0284	-0.1218	0.0111	-0.433	0.3282	-0.0497	0.2483	0.8175	0.6446	0.7311	0.2698	0.5465	0.4964	0.497	0.641	0.4952	0.4952	0.7451	0.5617	1	0.2443	-0.2182
Resilience very low	-0.391	-0.158	-0.232	-0.1992	-0.2254	0.4163	0.2905	-0.1768	-0.091	-0.1797	0.6824	-0.1945	-0.2406	-0.1411	0.1411	0.4712	-0.1461	-0.2425	-0.2578	-0.2362	-0.207	-0.1999	-0.197	0.2465	-0.2478	-0.268	-0.0706	-0.0719	0.2254	0.2811	-0.1853	0.1649	-0.5214	0.2657	0.3974	0.4523	0.402	0.0642	0.5162	0.7559	0.5414	0.5267	0.5212	0.5212	0.5204	0.0978	0.2443	1	0.1981
Resilience high %	0.0333	0.22	0.1017	-0.2976	0.1665	-0.1426	0.6283	0.0269	-0.2029	-0.0816	-0.065	0.3671	-0.2592	0.0118	-0.0119	-0.1418	0.5123	-0.3641	-0.2269	-0.2956	-0.2293	-0.3884	-0.4836	-0.4339	0.4948	-0.3801	-0.0778	-0.0797	0.1745	0.209	0.3232	-0.3967	-0.5787	-0.1728	-0.3307	-0.0362	-0.2055	-0.5749	0.0727	-0.1007	-0.1275	-0.1553	-0.2372	-0.2372	0.0671	-0.7639	-0.2182	0.1981	1
Resilience medium %	0.1174	-0.2351	-0.0314	0.1005	0.0851	-0.1263	-0.6185	-0.0164	0.0333	-0.203	-0.0852	-0.0566	0.447	-0.0844	0.0844	-0.0447	-0.2447	0.2342	-0.0666	0.0654	-0.0136	0.0591	0.481	0.1526	-0.0814	0.274	0.0965	0.0971	-0.0847	-0.1843	-0.0316	0.152	0.6075	0.0042	-0.1792	-0.3685	-0.2512	0.3865	-0.4345	-0.2885	-0.2195	-0.2835	-0.1058	-0.1058	-0.5194	0.3909	-0.3604	-0.454	-0.8194
Resilience low %	-0.1763	0.085	-0.0631	0.3906	-0.3939	0.3794	-0.0425	0.0275	0.3198	0.5638	0.0992	-0.4948	-0.3055	0.1706	-0.1704	0.2137	-0.4165	0.2724	0.5887	0.4612	0.4823	0.6276	0.0169	0.4226	-0.661	0.2339	-0.0227	-0.0201	-0.2089	-0.1004	-0.4655	0.3785	0.0337	0.2303	0.814	0.629	0.7245	0.2864	0.5423	0.5185	0.4929	0.6638	0.4822	0.4822	0.7077	0.6034	0.9881	0.2345	-0.3053
Resilience very low %	-0.391	-0.158	-0.232	-0.1992	-0.2254	0.4163	0.2905	-0.1768	-0.091	-0.1797	0.6824	-0.1945	-0.2406	-0.1411	0.1411	0.4712	-0.1461	-0.2425	-0.2578	-0.2362	-0.207	-0.1999	-0.197	0.2465	-0.2478	-0.268	-0.0706	-0.0719	0.2254	0.2811	-0.1853	0.1649	-0.5214	0.2657	0.3974	0.4523	0.402	0.0642	0.5162	0.7559	0.5414	0.5267	0.5212	0.5212	0.5204	0.0978	0.2443	1	0.1981
Substrate complexity high (number of species, RLS Team)	-0.3224	-0.4086	-0.0584	-0.0419	0.1695	0.0427	-0.1149	-0.4237	-0.2302	-0.0132	0.4599	0.1026	0.0924	0.0383	-0.0384	0.451	0.0818	0.11	0	0.5464	-0.0284	0.5544	-0.5312	0.3449	-0.2135	0.1414	0.0173	0.0187	0.2673	0.1244	0.0247	0.175	-0.0903	-0.095	0.5386	0.2869	0.3651	-0.0376	0.7925	0.5927	0.3027	0.5595	0.3511	0.3511	0.5441	0.2822	0.7193	0.5447	-0.0891
Substrate complexity medium	-0.4598	0.3358	-0.5491	0.1193	-0.6304	0.7873	0.1894	0.3713	0.5642	0.6368	0.4244	-0.7561	-0.4124	0.2614	-0.2612	0.3656	-0.7517	0.3982	0.3743	0.0267	0.5825	0.2462	0.2927	0.3413	-0.963	0.2853	0.0262	0.029	-0.2076	0.0782	-0.5808	0.4416	-0.1406	0.567	0.8781	0.8768	0.92	0.7209	0.2988	0.6679	0.8335	0.4461	0.8108	0.8108	0.781	0.8139	0.5675	0.414	-0.3981
Substrate complexity low	-0.293	0.1033	-0.2759	0.2737	-0.1432	0.5326	-0.0453	-0.0742	0.2193	0.6026	0.0809	-0.3005	-0.4148	0.3856	-0.3855	0.348	-0.4178	0.6971	0.4932	0.1863	0.3376	0.4074	-0.219	0.4169	-0.7124	0.3739	0.3742	0.3775	-0.1915	0.099	-0.152	0.4494	0.076	0.1812	0.9293	0.7464	0.7608	0.3858	0.6137	0.5789	0.7108	0.6185	0.742	0.742	0.855	0.7429	0.8638	0.2308	-0.2631
Substrate complexity high %	-0.2394	-0.3533	0.2741	-0.0385	0.465	-0.0865	0.0648	-0.5279	-0.4264	-0.2077	0.2233	0.5417	0.06	0.133	-0.1332	0.4658	0.5683	0.0508	-0.093	0.1628	-0.3224	0.0808	-0.5604	0.294	0.196	0.1048	0.2096	0.2108	0.1694	-0.019	0.4403	0.1563	0.0092	-0.3175	0.1532	0.0278	0.0053	-0.3308	0.7841	0.4256	0.1013	0.3702	0.1222	0.1222	0.2654	-0.1476	0.366	0.3902	0.3314
Substrate complexity medium %	0.3059	0.069	-0.0134	-0.2337	-0.3429	-0.2334	0.0614	0.3171	0.0592	-0.3005	-0.0236	-0.2493	0.151	-0.4692	0.4692	-0.4684	-0.083	-0.6598	-0.3336	-0.1396	-0.0174	-0.2372	0.4478	-0.4667	0.2923	-0.346	-0.5751	-0.5779	0.1408	0.0298	-0.3441	-0.3841	-0.267	0.2306	-0.6114	-0.3802	-0.3555	-0.0209	-0.7663	-0.4767	-0.4399	-0.5089	-0.4869	-0.4869	-0.5896	-0.4276	-0.6411	-0.1536	0.0659
Substrate complexity low %	-0.2899	0.0504	-0.0893	0.3071	0.2489	0.3253	-0.1019	-0.1923	0.0908	0.456	-0.0569	0.1022	-0.2121	0.5353	-0.5353	0.4055	-0.1159	0.8054	0.4532	0.1116	0.1465	0.2654	-0.3432	0.4699	-0.4412	0.3921	0.6381	0.6411	-0.2416	-0.0299	0.26	0.4198	0.3304	-0.1655	0.7052	0.4647	0.4425	0.1541	0.6549	0.4315	0.5109	0.4932	0.5616	0.5616	0.6346	0.5918	0.6602	0.0412	-0.2105
Total Biomass (g)	-0.209	-0.1668	-0.4942	-0.2497	-0.2972	0.6732	-0.0654	-0.2539	-0.1781	0.1416	0.343	-0.3336	-0.4967	-0.038	0.0381	0.3212	-0.3431	0.4822	-0.1798	-0.1688	-0.0187	-0.0215	-0.2845	0.0718	-0.5839	0.4877	0.078	0.082	0.177	0.4565	-0.2721	0.4354	-0.2408	0.7059	0.5992	0.6929	0.6771	0.7671	0.2306	0.5292	0.765	0.2533	0.8363	0.8363	0.5815	0.5504	0.231	0.3908	-0.1217
Total Biomass tonnes / hectare	-0.3006	-0.2741	-0.0441	-0.0713	0.0703	0.1914	0.1003	-0.317	-0.1834	-0.3933	0.5393	0.0584	-0.0233	-0.1248	0.1248	0.4517	-0.0396	-0.2276	-0.2735	-0.3233	-0.4392	-0.3222	-0.236	0.3577	-0.0104	-0.4287	0.1626	0.1597	0.1635	0.1728	0.0888	0.1182	-0.2737	-0.0667	0.2078	0.1414	0.0698	-0.1868	0.4791	0.6085	0.3224	0.5224	0.3353	0.3353	0.2757	0.0246	0.0925	0.8957	0.0891
Biomass <10cm %	0.4485	0.0593	0.7467	0.362	0.0719	-0.4334	0.0458	-0.041	-0.0573	-0.4485	-0.4219	0.2338	0.1534	-0.2624	0.2624	-0.35	0.3518	-0.6732	0.0481	-0.2844	-0.4003	-0.4514	-0.0743	0.0043	0.6892	-0.6489	-0.051	-0.0555	-0.2759	-0.4238	0.1509	-0.1993	0.1563	-0.3818	-0.7458	-0.6467	-0.7458	-0.6871	-0.3513	-0.4518	-0.6202	-0.0389	-0.6904	-0.6904	-0.6785	-0.6991	-0.4597	-0.1813	0.2764
≤10	-0.4452	0.3047	-0.3002	0.2763	-0.4404	0.922	0.2523	0.0729	0.3698	0.4903	0.3194	-0.5014	-0.6194	0.3524	-0.3523	0.5366	-0.5454	0.5167	0.3892	-0.3391	0.2125	-0.1326	-0.1885	0.5505	-0.8187	0.1981	0.4124	0.4149	-0.3601	0.0401	-0.2773	0.6493	-0.0565	0.4587	0.8645	0.9105	0.8182	0.5569	0.5269	0.8203	0.9865	0.7033	0.9676	0.9676	0.8506	0.7086	0.5112	0.5693	-0.169
≤12.5-≥20	-0.4063	-0.0559	-0.6207	-0.2329	-0.189	0.6587	-0.013	-0.096	0.0024	0.3492	0.4108	-0.2974	-0.3766	0.2034	-0.2033	0.4347	-0.3883	0.6598	-0.0398	-0.016	0.1968	0.1609	-0.1386	0.1501	-0.7162	0.5712	0.183	0.1874	0.1393	0.3996	-0.1829	0.4122	-0.1548	0.5325	0.7662	0.7559	0.7746	0.7501	0.3856	0.5991	0.8062	0.25	0.8725	0.8725	0.7211	0.706	0.3919	0.3531	-0.2217
≥25	-0.0851	-0.0022	-0.4212	-0.1182	0.1255	0.0255	-0.0496	-0.052	-0.0132	0.5126	-0.0713	-0.0435	-0.2252	0.2311	-0.231	-0.0548	-0.1852	0.5139	0.2068	0.4336	0.3239	0.6078	-0.2173	-0.1657	-0.3135	0.2425	0.0983	0.1001	0.2228	0.4119	0.0086	-0.135	-0.2324	-0.0426	0.6204	0.434	0.488	0.0419	0.363	0.1251	0.2631	0.1648	0.2967	0.2967	0.6668	0.3343	0.7382	-0.0063	0.0635
Total Biomass Reef	-0.2086	-0.2087	-0.4407	-0.1239	-0.3188	0.6688	-0.1182	-0.3197	-0.1567	0.2285	0.3308	-0.3875	-0.5311	-0.0248	0.0249	0.3472	-0.3936	0.5034	-0.0303	-0.0064	0.0418	0.1733	-0.3332	0.1858	-0.6638	0.4687	0.0817	0.0857	0.1525	0.4309	-0.3374	0.4791	-0.2298	0.6605	0.778	0.7797	0.7903	0.7099	0.411	0.635	0.8132	0.4647	0.8862	0.8862	0.7399	0.6436	0.5323	0.4647	-0.1701
Total Biomass Mangrove	0.0124	-0.0189	-0.3242	-0.0655	-0.362	0.5449	-0.1912	-0.0902	-0.0386	0.3306	-0.0241	-0.3839	-0.4396	0.0171	-0.017	0.0643	-0.3203	0.571	0.0616	0.0242	0.2161	0.1556	-0.1112	-0.0189	-0.5619	0.7134	0.004	0.0096	-0.026	0.2142	-0.3484	0.4445	0.0557	0.7126	0.4355	0.541	0.5734	0.8566	-0.0601	0.1613	0.5272	0.0138	0.5914	0.5914	0.3302	0.5503	0.1758	-0.1743	-0.2729
Total Biomass Seagrass	-0.532	0.6087	-0.3368	0.2194	-0.4621	0.5693	0.5561	0.5655	0.7184	0.8211	0.3032	-0.5218	-0.3686	0.5038	-0.5036	0.3302	-0.4462	0.2347	0.6013	0.1521	0.727	0.3178	0.2197	0.2986	-0.741	0.0776	0.0431	0.0447	-0.3153	-0.116	-0.3582	0.2233	-0.2139	0.168	0.7842	0.7949	0.8	0.2203	0.5111	0.602	0.6378	0.453	0.5251	0.5251	0.8452	0.4687	0.7201	0.3645	0.0139
Abudefduf saxatilis	-0.1135	0.2372	-0.0377	0.2925	-0.4991	0.7885	-0.0008	0.0604	0.2455	0.2679	0.0184	-0.4535	-0.4704	0.1568	-0.1567	0.2912	-0.3682	0.4497	0.2626	-0.3948	0.1269	-0.2993	-0.031	0.3917	-0.5994	0.4954	0.2511	0.2555	-0.4673	-0.1939	-0.3219	0.7367	0.3052	0.6574	0.3375	0.5248	0.462	0.8139	-0.0363	0.3395	0.6422	0.2323	0.6525	0.6525	0.2058	0.553	-0.0586	-0.0295	-0.3535
Acanthurus bahianus	0.0156	0.0561	-0.337	-0.0164	-0.0854	0.1106	-0.102	0.0117	0.0604	0.6167	-0.1789	-0.2134	-0.2999	0.1881	-0.188	-0.1317	-0.2339	0.5254	0.3273	0.5225	0.4685	0.6945	-0.1295	-0.1629	-0.4206	0.4407	-0.0337	-0.0303	0.1039	0.282	-0.1959	0.0004	-0.1194	0.1724	0.6075	0.4818	0.5691	0.2613	0.2305	0.0502	0.2669	0.1169	0.2939	0.2939	0.5961	0.4038	0.7487	-0.2102	-0.0469
Acanthurus chirurgus	0.0527	-0.1617	-0.2374	-0.2014	-0.2224	0.4151	-0.2337	-0.1809	-0.2105	-0.0661	0.0573	-0.1942	-0.243	-0.14	0.1401	0.0788	-0.1599	0.3559	-0.2565	-0.2286	-0.0978	-0.19	-0.0819	-0.0633	-0.2815	0.5557	0.0046	0.0086	0.0609	0.2039	-0.1861	0.3711	0.086	0.6395	0.0669	0.2304	0.229	0.7601	-0.2548	0.0468	0.3384	-0.1764	0.4189	0.4189	-0.0345	0.3236	-0.2956	-0.1279	-0.2466
Acanthurus coeruleus	-0.327	0.3224	-0.6445	-0.2197	-0.4081	0.3888	0.1523	0.5038	0.436	0.7151	0.2239	-0.5037	-0.163	0.28	-0.2799	0.0676	-0.4326	0.442	0.2119	0.4052	0.7924	0.5474	0.4406	-0.1638	-0.7177	0.6242	-0.2511	-0.2465	0.047	0.1524	-0.4405	0.0917	-0.1354	0.48	0.5578	0.5938	0.7258	0.7081	0.0059	0.1667	0.4157	-0.1935	0.4014	0.4014	0.4903	0.5624	0.3696	-0.1678	-0.2574
Anisotremus virginicus	0.1567	0.0685	0.7088	0.9046	-0.2169	0.2083	-0.295	-0.1334	0.2659	0.0749	-0.3312	-0.1967	-0.0601	0.106	-0.106	0.163	-0.1238	0.0925	0.6756	-0.0119	0.0061	-0.0053	-0.0037	0.7799	-0.1934	0.0621	0.3178	0.3189	-0.7329	-0.7396	-0.1652	0.6555	0.7644	-0.0415	0.1208	-0.0174	-0.0195	0.0779	0.1641	0.1467	0.0724	0.5867	0.0721	0.0721	-0.1258	0.3274	0.2849	-0.1894	-0.528
Apogon townsendi	0.7258	-0.2531	-0.0561	-0.0748	-0.2429	-0.2921	-0.3266	-0.2832	-0.3526	-0.0212	-0.4879	-0.297	-0.3856	-0.6043	0.6044	-0.7957	-0.252	-0.2394	-0.0664	0.2387	-0.116	0.3506	-0.3157	-0.5963	0.192	-0.3288	-0.4232	-0.4253	0.3557	0.5641	-0.4132	-0.4427	-0.5268	0.2502	0.0063	0.0057	0.029	-0.1836	-0.3941	-0.4386	-0.2321	0.0533	-0.2014	-0.2014	0.0834	-0.2125	0.35	-0.1154	0.2307
Aulostomus maculatus	-0.075	-0.158	-0.232	-0.1992	0.8252	-0.3683	-0.2283	-0.1768	-0.2232	-0.2156	-0.1174	0.6278	0.3614	0.2669	-0.2671	0.0203	0.1239	0.4349	-0.2578	-0.2362	-0.3668	-0.2138	-0.1523	-0.0911	0.3362	-0.1803	0.6356	0.6327	0.1881	0.2723	0.783	-0.3262	0.1814	-0.6884	-0.1343	-0.3769	-0.4466	-0.3981	0	-0.2362	-0.2069	-0.24	-0.1145	-0.1145	-0.1353	-0.0122	-0.3054	-0.125	-0.0436
Bodianus rufus	0.1172	-0.158	-0.232	-0.0391	-0.0624	-0.0104	-0.2283	-0.1768	-0.12	0.4269	-0.1534	-0.1743	-0.2406	-0.0023	0.0024	-0.1652	-0.1578	0.3625	0.2199	0.6142	0.3254	0.7551	-0.197	-0.1669	-0.3032	0.3711	-0.1548	-0.1518	0.2261	0.3194	-0.235	-0.0326	-0.1613	0.1711	0.5424	0.3769	0.4913	0.1798	0.2581	0.0472	0.1661	0.1808	0.2129	0.2129	0.5204	0.3179	0.7941	-0.125	-0.0436
Canthigaster rostrata	-0.2576	-0.3338	-0.034	-0.3331	0.9219	-0.4627	-0.0451	-0.3276	-0.4097	-0.4205	0.1822	0.8551	0.5062	0.2174	-0.2177	0.2866	0.5353	0.1319	-0.4208	-0.0647	-0.463	-0.1663	-0.2554	-0.001	0.5015	-0.1493	0.4303	0.428	0.3474	0.1615	0.8677	-0.3024	0.0748	-0.7592	-0.2248	-0.4403	-0.4815	-0.5674	0.3547	-0.003	-0.2649	-0.1694	-0.2013	-0.2013	-0.139	-0.2683	-0.2379	0.153	0.2131
Carangoides ruber	0.0598	-0.1931	-0.2709	-0.2167	-0.1835	0.4006	-0.2731	-0.2188	-0.2431	-0.0367	0.037	-0.1754	-0.2524	-0.1263	0.1263	0.0701	-0.1644	0.4232	-0.2503	-0.179	-0.0891	-0.1252	-0.1194	-0.0806	-0.2972	0.596	0.0257	0.03	0.0947	0.2515	-0.1667	0.3607	0.0833	0.6272	0.1185	0.2532	0.2595	0.766	-0.222	0.045	0.3511	-0.1672	0.4429	0.4429	0.0141	0.3595	-0.2291	-0.1465	-0.2542
Cephalopholis cruentata	-0.2982	-0.0137	-0.469	-0.252	0.6244	0.0544	-0.0752	-0.1075	-0.116	0.1149	0.0258	0.4369	0.0627	0.4656	-0.4657	0.2426	-0.0056	0.776	-0.146	-0.2375	-0.1336	-0.1379	-0.2361	-0.0186	-0.0715	0.2131	0.693	0.6935	0.1307	0.3528	0.646	-0.0461	0.1197	-0.3449	0.2499	0.0938	0.0176	0.0282	0.2068	0.0641	0.2414	-0.1375	0.3283	0.3283	0.2652	0.2973	-0.0884	-0.0454	-0.043
Chaetodipterus faber	-0.391	-0.158	-0.232	-0.1992	-0.2254	0.4163	0.2905	-0.1768	-0.091	-0.1797	0.6824	-0.1945	-0.2406	-0.1411	0.1411	0.4712	-0.1461	-0.2425	-0.2578	-0.2362	-0.207	-0.1999	-0.197	0.2465	-0.2478	-0.268	-0.0706	-0.0719	0.2254	0.2811	-0.1853	0.1649	-0.5214	0.2657	0.3974	0.4523	0.402	0.0642	0.5162	0.7559	0.5414	0.5267	0.5212	0.5212	0.5204	0.0978	0.2443	1	0.1981
Chaetodon capistratus	-0.5797	0.5391	-0.0015	0.2079	0.1365	0.3518	0.6126	0.3005	0.417	0.6753	0.1087	0.1774	-0.2138	0.7973	-0.7972	0.5144	0.2161	0.4626	0.5427	0.0826	0.4507	0.1246	-0.192	0.3535	-0.34	0.3085	0.4194	0.4226	-0.3671	-0.2994	0.3114	0.2758	0.1016	-0.2558	0.5032	0.5133	0.443	-0.0781	0.7563	0.4824	0.4481	0.2871	0.3486	0.3486	0.6522	0.1665	0.5091	0.0935	0.3255
Chaetodon ocellatus	-0.0706	-0.3419	-0.0831	-0.3031	0.7008	-0.4122	-0.14	-0.3826	-0.4534	-0.0257	-0.0498	0.6349	0.2163	0.1832	-0.1834	0.0719	0.4768	0.3336	-0.1759	0.4069	-0.1277	0.3839	-0.397	-0.1864	0.2726	0.2437	0.1799	0.1811	0.4102	0.2822	0.5618	-0.2571	-0.0221	-0.4631	0.0841	-0.1349	-0.0935	-0.3324	0.4257	-0.0614	-0.1693	-0.1134	-0.1006	-0.1006	0.1693	-0.1161	0.298	-0.1075	0.2563
Chaetodon striatus	-0.1934	0.509	-0.3753	0.0304	-0.212	0.185	0.3375	0.4874	0.474	0.8662	-0.1125	-0.2957	-0.2975	0.4378	-0.4377	-0.0992	-0.2553	0.3895	0.5089	0.4143	0.7541	0.5699	0.1221	-0.1756	-0.4711	0.2775	-0.0556	-0.053	-0.1021	0.0818	-0.2032	-0.0996	-0.2013	0.066	0.5538	0.5446	0.5912	0.1334	0.2004	0.0628	0.2705	0.017	0.1984	0.1984	0.6333	0.2789	0.6437	-0.2022	0.1314
Chromis multilineata	-0.3976	0.9645	-0.232	0.1209	-0.2254	0.3309	0.8094	0.8839	0.8078	0.7519	-0.0327	-0.1945	-0.2406	0.6596	-0.6595	0.0522	-0.1578	0.1609	0.4929	-0.2362	0.6448	-0.1722	0.2947	-0.0504	-0.2982	-0.0707	0.18	0.1802	-0.4609	-0.2486	0.0311	-0.0771	-0.1194	-0.103	0.1557	0.3769	0.268	-0.0514	0	0.0472	0.2411	-0.148	0.0739	0.0739	0.333	-0.0122	-0.0305	-0.125	0.3323
Coryphopterus glaucofraenum	-0.2452	0.5485	-0.3627	-0.0343	-0.3917	0.6391	0.3723	0.4491	0.4099	0.5388	0.025	-0.354	-0.4412	0.3622	-0.3621	0.1265	-0.2885	0.4519	0.2012	-0.3204	0.4084	-0.2198	0.0983	-0.04	-0.5204	0.4406	0.1406	0.1444	-0.2975	-0.0002	-0.1843	0.3104	-0.0219	0.5011	0.2717	0.5495	0.4746	0.6309	-0.1368	0.143	0.5288	-0.1531	0.4778	0.4778	0.3085	0.3277	-0.141	-0.1546	0.0161
Coryphopterus personatus	-0.4128	0.0711	-0.112	0.1207	-0.3966	0.6647	0.3543	-0.0808	0.1418	0.0814	0.5441	-0.3611	-0.4507	0.0433	-0.0432	0.5395	-0.2834	-0.0617	0.0952	-0.3088	-0.0558	-0.2179	-0.2355	0.4835	-0.4706	-0.1823	0.1082	0.108	-0.1105	0.07	-0.277	0.4292	-0.3383	0.3408	0.5925	0.6653	0.5795	0.183	0.6067	0.8703	0.7451	0.7506	0.6981	0.6981	0.6804	0.2897	0.4221	0.9302	0.108
Diodon hystrix	0.1172	-0.158	-0.232	-0.0391	-0.0624	-0.0104	-0.2283	-0.1768	-0.12	0.4269	-0.1534	-0.1743	-0.2406	-0.0023	0.0024	-0.1652	-0.1578	0.3625	0.2199	0.6142	0.3254	0.7551	-0.197	-0.1669	-0.3032	0.3711	-0.1548	-0.1518	0.2261	0.3194	-0.235	-0.0326	-0.1613	0.1711	0.5424	0.3769	0.4913	0.1798	0.2581	0.0472	0.1661	0.1808	0.2129	0.2129	0.5204	0.3179	0.7941	-0.125	-0.0436
Echeneis neucratoides	0.1172	-0.158	-0.232	-0.0391	-0.0624	-0.0104	-0.2283	-0.1768	-0.12	0.4269	-0.1534	-0.1743	-0.2406	-0.0023	0.0024	-0.1652	-0.1578	0.3625	0.2199	0.6142	0.3254	0.7551	-0.197	-0.1669	-0.3032	0.3711	-0.1548	-0.1518	0.2261	0.3194	-0.235	-0.0326	-0.1613	0.1711	0.5424	0.3769	0.4913	0.1798	0.2581	0.0472	0.1661	0.1808	0.2129	0.2129	0.5204	0.3179	0.7941	-0.125	-0.0436
Elacatinus xanthiprora	-0.2065	-0.2358	-0.3462	-0.2973	-0.3364	0.6212	-0.0088	-0.2638	-0.2347	-0.1758	0.4878	-0.2903	-0.3591	-0.2106	0.2106	0.3704	-0.228	0.1409	-0.3848	-0.3525	-0.2182	-0.2984	-0.1924	0.1065	-0.3956	0.2973	-0.0422	-0.0397	0.1921	0.3478	-0.2775	0.4231	-0.2591	0.715	0.3046	0.4821	0.4475	0.6872	0.1101	0.5238	0.6329	0.1856	0.6875	0.6875	0.2973	0.3337	-0.1042	0.533	-0.0823
Equetus punctatus	0.1172	-0.158	-0.232	-0.0391	-0.0624	-0.0104	-0.2283	-0.1768	-0.12	0.4269	-0.1534	-0.1743	-0.2406	-0.0023	0.0024	-0.1652	-0.1578	0.3625	0.2199	0.6142	0.3254	0.7551	-0.197	-0.1669	-0.3032	0.3711	-0.1548	-0.1518	0.2261	0.3194	-0.235	-0.0326	-0.1613	0.1711	0.5424	0.3769	0.4913	0.1798	0.2581	0.0472	0.1661	0.1808	0.2129	0.2129	0.5204	0.3179	0.7941	-0.125	-0.0436
Ginglymostoma cirratum	0.1819	0.1414	0.7135	0.9534	-0.2254	0.3352	-0.2283	-0.1768	0.2511	0.089	-0.4005	-0.1945	-0.2406	0.1429	-0.1428	0.1674	-0.1578	0.1712	0.6976	-0.2362	-0.1006	-0.1999	-0.1821	0.7996	-0.1975	-0.0103	0.4771	0.4779	-0.81	-0.6826	-0.1066	0.7131	0.7207	-0.0089	0.1557	0.0754	0	0.0642	0.1721	0.189	0.1964	0.6756	0.19	0.19	-0.0416	0.3179	0.2443	-0.125	-0.4196
Gymnothorax funebris	-0.391	-0.158	-0.232	-0.1992	-0.2254	0.4163	0.2905	-0.1768	-0.091	-0.1797	0.6824	-0.1945	-0.2406	-0.1411	0.1411	0.4712	-0.1461	-0.2425	-0.2578	-0.2362	-0.207	-0.1999	-0.197	0.2465	-0.2478	-0.268	-0.0706	-0.0719	0.2254	0.2811	-0.1853	0.1649	-0.5214	0.2657	0.3974	0.4523	0.402	0.0642	0.5162	0.7559	0.5414	0.5267	0.5212	0.5212	0.5204	0.0978	0.2443	1	0.1981
Haemulon carbonarium	-0.1526	0.3387	-0.3324	-0.1242	-0.323	0.5534	0.1953	0.2806	0.2143	0.3122	0.0394	-0.2787	-0.3448	0.2009	-0.2008	0.1016	-0.2261	0.4035	0.0085	-0.3384	0.2311	-0.2725	0.076	-0.0812	-0.4084	0.4752	0.0938	0.0976	-0.1797	0.0579	-0.1576	0.3074	0.021	0.5421	0.1333	0.3999	0.3424	0.6782	-0.2398	0.0677	0.4337	-0.2393	0.4231	0.4231	0.129	0.2893	-0.2992	-0.1791	-0.0604
Haemulon flavolineatum	-0.3847	0.0595	-0.3032	0.0645	0.2535	0.2076	-0.1256	0.1144	0.2444	-0.0492	0.2599	0.0593	0.2512	0.3299	-0.3299	0.3872	-0.3364	0.4178	-0.0239	-0.3939	-0.091	-0.3205	0.2606	0.3947	-0.2429	-0.0655	0.5904	0.5889	-0.1676	-0.0383	0.2988	0.1787	0.3404	-0.2503	0.1814	0.0003	-0.0401	0.1488	0.0617	0.2356	0.2515	0.0693	0.3121	0.3121	0.0223	0.4706	-0.2525	0.1761	-0.5095
Haemulon macrostomum	0.0512	-0.158	-0.232	-0.1992	-0.2254	0.4163	-0.2283	-0.1768	-0.2069	-0.0713	0.0602	-0.1945	-0.2406	-0.1411	0.1411	0.081	-0.1578	0.347	-0.2578	-0.2362	-0.1006	-0.1999	-0.0778	-0.06	-0.278	0.5496	0.0034	0.0074	0.0563	0.197	-0.1864	0.3725	0.0873	0.6391	0.0591	0.2261	0.2233	0.7577	-0.2581	0.0472	0.3361	-0.1774	0.4153	0.4153	-0.0416	0.3179	-0.3054	-0.125	-0.2451
Haemulon plumierii	-0.3934	-0.1533	-0.2637	-0.1884	-0.2559	0.4471	0.2794	-0.1794	-0.0787	-0.1065	0.6721	-0.2373	-0.2861	-0.1248	0.1249	0.4677	-0.1828	-0.1878	-0.2107	-0.1751	-0.1502	-0.1175	-0.2124	0.2465	-0.3126	-0.2151	-0.0802	-0.081	0.2285	0.3052	-0.2275	0.1849	-0.5347	0.3027	0.4823	0.5237	0.4844	0.1073	0.5552	0.7829	0.5888	0.5633	0.5709	0.5709	0.6007	0.1565	0.3465	0.9931	0.1842
Haemulon sciurus	0.1032	-0.1714	-0.2423	-0.0424	-0.0773	-0.0135	-0.2391	-0.1688	-0.1087	0.423	-0.1232	-0.1948	-0.2174	-0.0137	0.0138	-0.1541	-0.1752	0.3451	0.2171	0.6419	0.3419	0.7825	-0.161	-0.1544	-0.3206	0.3708	-0.1802	-0.1773	0.2367	0.314	-0.2607	-0.032	-0.1619	0.1771	0.5545	0.3771	0.5033	0.1917	0.2647	0.0633	0.1651	0.1879	0.2132	0.2132	0.5211	0.3365	0.8101	-0.1069	-0.0746
Halichoeres bivittatus	-0.0128	-0.1186	-0.2741	-0.223	-0.2002	0.4546	-0.1605	-0.168	-0.1983	0.0392	0.0715	-0.1672	-0.2951	-0.0507	0.0508	0.1283	-0.1191	0.4377	-0.2099	-0.1732	-0.0282	-0.1232	-0.1413	-0.0679	-0.332	0.6379	0.0274	0.0321	0.0673	0.2226	-0.1548	0.3864	0.0536	0.6361	0.1588	0.326	0.3229	0.7691	-0.1427	0.1065	0.4071	-0.1544	0.4795	0.4795	0.089	0.3446	-0.1892	-0.1204	-0.1723
Holacanthus ciliaris	-0.2544	0.0171	-0.1957	0.0704	-0.2643	-0.0705	-0.208	0.4249	0.4663	0.266	0.3066	-0.3947	0.4886	0.0639	-0.0638	0.1106	-0.3419	-0.0328	0.2274	0.6634	0.6486	0.674	0.8748	0.1968	-0.4391	0.307	-0.3882	-0.3866	-0.0305	-0.3155	-0.4426	0.0542	0.2937	0.0593	0.2164	-0.0115	0.2425	0.3708	-0.0332	0.0608	-0.0973	-0.1114	-0.0868	-0.0868	-0.0675	0.4781	0.2774	-0.1736	-0.7334
Holocentrus rufus	-0.391	-0.158	-0.232	-0.1992	-0.2254	0.4163	0.2905	-0.1768	-0.091	-0.1797	0.6824	-0.1945	-0.2406	-0.1411	0.1411	0.4712	-0.1461	-0.2425	-0.2578	-0.2362	-0.207	-0.1999	-0.197	0.2465	-0.2478	-0.268	-0.0706	-0.0719	0.2254	0.2811	-0.1853	0.1649	-0.5214	0.2657	0.3974	0.4523	0.402	0.0642	0.5162	0.7559	0.5414	0.5267	0.5212	0.5212	0.5204	0.0978	0.2443	1	0.1981
Hypoplectrus nigricans	-0.5572	0.4544	-0.3353	-0.0578	-0.3807	0.655	0.7131	0.352	0.407	0.2933	0.5467	-0.3321	-0.4282	0.269	-0.2689	0.4544	-0.2749	-0.0558	0.0853	-0.4452	0.1703	-0.3606	-0.0322	0.2255	-0.4421	-0.2449	0.1062	0.1054	-0.1397	0.0918	-0.166	0.1855	-0.4859	0.2491	0.4585	0.6655	0.5362	0.1134	0.4143	0.7063	0.6891	0.4023	0.5779	0.5779	0.6563	0.1344	0.1529	0.7901	0.3311
Hypoplectrus puella	-0.4728	0.2193	-0.5323	-0.3226	-0.335	0.7349	0.4421	0.1373	0.1112	0.2962	0.4964	-0.2876	-0.4871	0.2024	-0.2023	0.432	-0.2158	0.3108	-0.1305	-0.3156	0.1654	-0.2178	-0.1434	0.0241	-0.5506	0.3405	0.0515	0.0548	0.0684	0.3144	-0.1779	0.3179	-0.4011	0.586	0.4976	0.743	0.6692	0.5948	0.2856	0.597	0.7787	0.1254	0.751	0.751	0.6262	0.3223	0.067	0.4928	0.1995
Hypoplectrus unicolor	-0.391	-0.158	-0.232	-0.1992	-0.2254	0.4163	0.2905	-0.1768	-0.091	-0.1797	0.6824	-0.1945	-0.2406	-0.1411	0.1411	0.4712	-0.1461	-0.2425	-0.2578	-0.2362	-0.207	-0.1999	-0.197	0.2465	-0.2478	-0.268	-0.0706	-0.0719	0.2254	0.2811	-0.1853	0.1649	-0.5214	0.2657	0.3974	0.4523	0.402	0.0642	0.5162	0.7559	0.5414	0.5267	0.5212	0.5212	0.5204	0.0978	0.2443	1	0.1981
Lucayablennius zingaro	-0.3976	0.9645	-0.232	0.1209	-0.2254	0.3309	0.8094	0.8839	0.8078	0.7519	-0.0327	-0.1945	-0.2406	0.6596	-0.6595	0.0522	-0.1578	0.1609	0.4929	-0.2362	0.6448	-0.1722	0.2947	-0.0504	-0.2982	-0.0707	0.18	0.1802	-0.4609	-0.2486	0.0311	-0.0771	-0.1194	-0.103	0.1557	0.3769	0.268	-0.0514	0	0.0472	0.2411	-0.148	0.0739	0.0739	0.333	-0.0122	-0.0305	-0.125	0.3323
Lutjanus apodus	0.1819	0.1414	0.7135	0.9534	-0.2254	0.3352	-0.2283	-0.1768	0.2511	0.089	-0.4005	-0.1945	-0.2406	0.1429	-0.1428	0.1674	-0.1578	0.1712	0.6976	-0.2362	-0.1006	-0.1999	-0.1821	0.7996	-0.1975	-0.0103	0.4771	0.4779	-0.81	-0.6826	-0.1066	0.7131	0.7207	-0.0089	0.1557	0.0754	0	0.0642	0.1721	0.189	0.1964	0.6756	0.19	0.19	-0.0416	0.3179	0.2443	-0.125	-0.4196
Lutjanus griseus	0.1447	0.1146	0.6776	0.9249	-0.2379	0.2796	-0.2698	-0.1161	0.2978	0.0809	-0.3325	-0.2264	-0.1169	0.1266	-0.1265	0.1759	-0.1865	0.1272	0.681	-0.1303	-0.0256	-0.1054	-0.0248	0.8031	-0.2228	0.0146	0.3926	0.3934	-0.7756	-0.7188	-0.1562	0.6819	0.754	-0.0227	0.1417	0.0231	-0.0078	0.0961	0.1431	0.1737	0.137	0.6177	0.135	0.135	-0.0984	0.3564	0.2406	-0.1477	-0.5288
Lutjanus jocu	0.0742	-0.0528	-0.2594	-0.0261	-0.0877	0.026	-0.1408	-0.0807	-0.0318	0.5132	-0.1583	-0.1971	-0.2691	0.0704	-0.0704	-0.1607	-0.1764	0.3831	0.276	0.5929	0.399	0.742	-0.1661	-0.1737	-0.3384	0.3662	-0.1361	-0.1331	0.177	0.2945	-0.2334	-0.0414	-0.1758	0.161	0.5638	0.4214	0.5247	0.1755	0.2601	0.0528	0.194	0.1659	0.2227	0.2227	0.5612	0.3191	0.7969	-0.1398	-0.0073
Lutjanus synagris	0.1819	0.1414	0.7135	0.9534	-0.2254	0.3352	-0.2283	-0.1768	0.2511	0.089	-0.4005	-0.1945	-0.2406	0.1429	-0.1428	0.1674	-0.1578	0.1712	0.6976	-0.2362	-0.1006	-0.1999	-0.1821	0.7996	-0.1975	-0.0103	0.4771	0.4779	-0.81	-0.6826	-0.1066	0.7131	0.7207	-0.0089	0.1557	0.0754	0	0.0642	0.1721	0.189	0.1964	0.6756	0.19	0.19	-0.0416	0.3179	0.2443	-0.125	-0.4196
Malacoctenus triangulatus	0.1086	-0.2282	-0.3351	-0.2037	-0.24	0.3771	-0.3297	-0.2553	-0.2532	0.1587	-0.0253	-0.2703	-0.3476	-0.1309	0.131	-0.0123	-0.2279	0.5094	-0.1215	0.1055	0.0785	0.2128	-0.175	-0.1428	-0.4148	0.7001	-0.0781	-0.0729	0.1704	0.3488	-0.2947	0.3252	-0.0045	0.6773	0.3392	0.4058	0.4633	0.7908	-0.1017	0.0682	0.3962	-0.0681	0.4935	0.4935	0.2351	0.4592	0.1364	-0.1805	-0.2482
Microspathodon chrysurus	0.0389	-0.2471	-0.1475	-0.2777	0.8738	-0.5803	-0.2681	-0.1966	-0.3192	-0.3737	-0.1514	0.7074	0.4993	0.122	-0.1222	-0.1111	0.2468	0.2217	-0.3814	-0.1643	-0.435	-0.1997	-0.0951	-0.2268	0.5399	-0.2755	0.4705	0.4668	0.2942	0.2677	0.7922	-0.4874	0.1411	-0.7556	-0.3587	-0.5922	-0.6382	-0.5353	-0.1347	-0.4077	-0.4433	-0.3867	-0.3531	-0.3531	-0.3476	-0.2147	-0.4359	-0.196	0.0175
Ocyurus chrysurus	-0.3209	-0.2207	-0.3241	-0.2073	-0.2426	0.3923	0.1758	-0.2469	-0.1399	0.018	0.5826	-0.2628	-0.3361	-0.1356	0.1356	0.376	-0.2092	-0.0704	-0.1483	0.0471	-0.0531	0.1442	-0.2752	0.161	-0.3707	-0.091	-0.136	-0.1359	0.3151	0.4097	-0.2808	0.1428	-0.5687	0.3292	0.6194	0.5983	0.6011	0.1409	0.6066	0.7417	0.5899	0.5823	0.5914	0.5914	0.7269	0.2342	0.5851	0.898	0.1695
Odontoscion dentex	0.1819	0.1414	0.7135	0.9534	-0.2254	0.3352	-0.2283	-0.1768	0.2511	0.089	-0.4005	-0.1945	-0.2406	0.1429	-0.1428	0.1674	-0.1578	0.1712	0.6976	-0.2362	-0.1006	-0.1999	-0.1821	0.7996	-0.1975	-0.0103	0.4771	0.4779	-0.81	-0.6826	-0.1066	0.7131	0.7207	-0.0089	0.1557	0.0754	0	0.0642	0.1721	0.189	0.1964	0.6756	0.19	0.19	-0.0416	0.3179	0.2443	-0.125	-0.4196
Platybelone araglus	0	0	0	0	0	0	0	0	0	0	0	0	0	0	0	0	0	0	0	0	0	0	0	0	0	0	0	0	0	0	0	0	0	0	0	0	0	0	0	0	0	0	0	0	0	0	0	0	0
Pomacanthus arcuatus	-0.1451	-0.1293	0.2011	0.4902	-0.3334	0.166	-0.3144	0.0063	0.3157	0.1035	0.2224	-0.4216	0.1899	-0.0226	0.0228	0.294	-0.3555	-0.0408	0.4172	0.4061	0.2838	0.4448	0.4139	0.6516	-0.46	0.1215	-0.0991	-0.0981	-0.2839	-0.447	-0.452	0.4471	0.4204	0.096	0.3961	0.1331	0.2921	0.2751	0.2931	0.3902	0.1556	0.5177	0.1782	0.1782	0.1021	0.553	0.5316	0.1628	-0.7297
Pseudupeneus maculatus	-0.2302	-0.2155	-0.2282	-0.0319	-0.2753	0.412	0.0625	-0.2995	-0.1134	0.1392	0.4207	-0.3163	-0.4077	-0.0988	0.0989	0.329	-0.2572	0.057	0.0422	0.156	0.016	0.2859	-0.3312	0.2436	-0.4473	0.0089	-0.0792	-0.0782	0.2018	0.3333	-0.3327	0.2457	-0.4314	0.3404	0.726	0.6512	0.6693	0.1844	0.6457	0.7183	0.6116	0.692	0.6237	0.6237	0.7837	0.3481	0.7735	0.7623	0.0698
Pterois volitans	0.1819	0.1414	0.7135	0.9534	-0.2254	0.3352	-0.2283	-0.1768	0.2511	0.089	-0.4005	-0.1945	-0.2406	0.1429	-0.1428	0.1674	-0.1578	0.1712	0.6976	-0.2362	-0.1006	-0.1999	-0.1821	0.7996	-0.1975	-0.0103	0.4771	0.4779	-0.81	-0.6826	-0.1066	0.7131	0.7207	-0.0089	0.1557	0.0754	0	0.0642	0.1721	0.189	0.1964	0.6756	0.19	0.19	-0.0416	0.3179	0.2443	-0.125	-0.4196
Scarus iseri	-0.083	-0.0528	-0.4212	-0.2158	-0.33	0.5866	-0.0983	-0.1084	-0.1005	0.216	0.1401	-0.3367	-0.4352	-0.0138	0.0139	0.1513	-0.2919	0.5039	-0.114	-0.113	0.1082	0.0037	-0.1422	-0.0534	-0.5256	0.633	0.0048	0.0097	0.0792	0.3216	-0.2926	0.4035	-0.0837	0.7314	0.4047	0.5552	0.5601	0.8415	-0.0316	0.2531	0.5863	-0.009	0.6485	0.6485	0.3501	0.4879	0.0513	0.0159	-0.1737
Scomberomorus regalis	-0.0892	-0.0251	0.3967	0.6327	-0.402	0.6728	-0.0639	-0.3152	0.1003	-0.0615	0.124	-0.3469	-0.4291	-0.0082	0.0083	0.4765	-0.2736	0.0782	0.3592	-0.4212	-0.2498	-0.3565	-0.307	0.8325	-0.4067	-0.0406	0.3632	0.3641	-0.5304	-0.347	-0.2632	0.8189	0.296	0.3373	0.412	0.4236	0.325	0.298	0.4206	0.6745	0.6154	0.8805	0.6175	0.6175	0.2975	0.4213	0.2902	0.5212	-0.2935
Serranus tigrinus	-0.4	0.0308	-0.0746	0.2666	-0.1501	0.4928	0.1471	-0.0954	0.1982	0.0302	0.4346	-0.2257	-0.2204	0.1485	-0.1484	0.5309	-0.3493	0.0747	0.1771	-0.3134	-0.1166	-0.2063	-0.1327	0.6183	-0.4021	-0.2955	0.3626	0.361	-0.1962	-0.0192	-0.0744	0.3809	-0.0727	0.016	0.561	0.4554	0.3786	0.0248	0.5796	0.7597	0.602	0.7598	0.5916	0.5916	0.55	0.3964	0.389	0.8058	-0.1432
Serranus tortugarum	-0.4152	0.9179	-0.3208	0.0486	-0.2637	0.4534	0.7651	0.8293	0.7471	0.7218	0.0174	-0.2314	-0.3053	0.6341	-0.634	0.1029	-0.2047	0.2611	0.4034	-0.3267	0.5971	-0.2491	0.2592	-0.0568	-0.375	0.051	0.2081	0.2091	-0.4298	-0.1703	0.0068	0.016	-0.1197	0.05	0.1905	0.451	0.3338	0.1355	-0.0387	0.0937	0.3558	-0.1773	0.2106	0.2106	0.3502	0.0775	-0.112	-0.1072	0.2807
Sparisoma aurofrenatum	-0.1225	-0.1462	-0.369	-0.2684	0.7796	-0.3185	-0.266	-0.1077	-0.1762	-0.1264	-0.075	0.554	0.3794	0.2983	-0.2985	0.0289	0.043	0.5434	-0.2655	-0.1584	-0.2443	-0.1149	-0.0429	-0.1324	0.2138	-0.0232	0.5929	0.591	0.2223	0.3115	0.7169	-0.3065	0.1995	-0.593	-0.0632	-0.312	-0.3463	-0.2245	-0.0453	-0.2405	-0.1562	-0.3283	-0.0508	-0.0508	-0.1032	0.1148	-0.2945	-0.1988	-0.1529
Sparisoma viride	-0.3409	0.6508	-0.5853	-0.1549	-0.2381	0.4769	0.4611	0.6176	0.5176	0.7433	0.026	-0.2883	-0.3504	0.5188	-0.5187	0.0477	-0.3258	0.5413	0.2516	-0.1277	0.6062	0.0152	0.1901	-0.2049	-0.5281	0.3724	0.1482	0.1512	-0.1729	0.138	-0.0813	0.0367	-0.1593	0.2719	0.3859	0.5704	0.5233	0.4502	-0.0686	0.0757	0.4604	-0.2482	0.3972	0.3972	0.4716	0.3292	0.0351	-0.1927	0.0975
Stegastes adustus	-0.4396	-0.1987	-0.2576	-0.3442	0.2199	0.1473	0.2976	-0.2248	-0.2199	-0.2935	0.6213	0.2158	-0.0181	0.0093	-0.0094	0.4732	0.0997	-0.1403	-0.4027	-0.288	-0.3607	-0.2931	-0.2846	0.1342	0.0322	-0.3432	0.1499	0.1474	0.3388	0.3479	0.2538	-0.0605	-0.4668	-0.1296	0.2142	0.1982	0.115	-0.2358	0.5414	0.59	0.3358	0.3186	0.3338	0.3338	0.3919	-0.0819	0.0547	0.8915	0.3388
Stegastes diencaeus	0.0512	-0.158	-0.232	-0.1992	-0.2254	0.4163	-0.2283	-0.1768	-0.2069	-0.0713	0.0602	-0.1945	-0.2406	-0.1411	0.1411	0.081	-0.1578	0.347	-0.2578	-0.2362	-0.1006	-0.1999	-0.0778	-0.06	-0.278	0.5496	0.0034	0.0074	0.0563	0.197	-0.1864	0.3725	0.0873	0.6391	0.0591	0.2261	0.2233	0.7577	-0.2581	0.0472	0.3361	-0.1774	0.4153	0.4153	-0.0416	0.3179	-0.3054	-0.125	-0.2451
Stegastes partitus	-0.4424	0.9295	-0.2072	0.3429	-0.2966	0.6026	0.6984	0.7103	0.8171	0.8891	-0.0523	-0.3094	-0.4621	0.7548	-0.7546	0.2255	-0.3162	0.4477	0.7016	-0.2663	0.6356	-0.1192	0.0947	0.2363	-0.5631	0.0733	0.4123	0.4138	-0.6157	-0.2646	-0.0268	0.2409	0.0109	0.013	0.5072	0.6579	0.5305	0.1322	0.2554	0.315	0.5621	0.2142	0.4232	0.4232	0.6253	0.3068	0.2856	-0.0081	0.1741
Stegastes planifrons	0.1017	-0.3297	-0.5157	-0.5205	0.0233	0.1787	-0.1188	-0.3537	-0.4668	-0.3833	0.2076	-0.0423	-0.2961	-0.3798	0.3798	-0.0904	-0.2468	0.0534	-0.6493	-0.5187	-0.5266	-0.4288	-0.3619	-0.3587	0.0473	-0.2342	0.0618	0.0597	0.4933	0.7922	0.018	-0.1744	-0.5645	0.3381	0.0464	0.1559	0.0523	0.1655	-0.2059	0.085	0.2806	-0.0341	0.3629	0.3629	0.1561	-0.0005	-0.3086	0.4739	0.1833
Stegastes variabilis	-0.3976	0.9645	-0.232	0.1209	-0.2254	0.3309	0.8094	0.8839	0.8078	0.7519	-0.0327	-0.1945	-0.2406	0.6596	-0.6595	0.0522	-0.1578	0.1609	0.4929	-0.2362	0.6448	-0.1722	0.2947	-0.0504	-0.2982	-0.0707	0.18	0.1802	-0.4609	-0.2486	0.0311	-0.0771	-0.1194	-0.103	0.1557	0.3769	0.268	-0.0514	0	0.0472	0.2411	-0.148	0.0739	0.0739	0.333	-0.0122	-0.0305	-0.125	0.3323
Synodus intermedius	-0.3713	0.1664	-0.4445	-0.128	-0.3098	0.4423	0.3849	0.1046	0.1796	0.4994	0.3825	-0.3576	-0.4611	0.1682	-0.1681	0.251	-0.2936	0.1572	0.1776	0.1844	0.3581	0.3439	-0.172	0.0385	-0.5373	0.0477	-0.0936	-0.0923	0.1455	0.3459	-0.3018	0.0669	-0.5613	0.2841	0.7691	0.7786	0.7811	0.1613	0.58	0.6214	0.6307	0.4681	0.5808	0.5808	0.9188	0.3063	0.7651	0.6032	0.2546
Thalassoma bifasciatum	-0.2072	-0.2733	-0.3723	-0.3613	0.4234	-0.603	-0.3357	0.1933	0.0471	-0.0301	0.2533	0.2113	0.8255	0.0617	-0.0617	-0.027	0.0059	0.0388	-0.2071	0.7118	0.3255	0.6733	0.6782	-0.1889	0.0532	0.1569	-0.2417	-0.2424	0.4329	0.0658	0.1409	-0.4592	0.153	-0.4531	-0.0568	-0.4206	-0.1777	-0.0881	-0.0554	-0.2519	-0.4719	-0.478	-0.399	-0.399	-0.2401	0.1575	0.0522	-0.2617	-0.4753
Abudefduf saxatilis 2	-0.2822	0.3738	-0.1123	0.3836	-0.6425	0.9032	0.1224	0.2302	0.478	0.4894	0.1495	-0.6282	-0.4994	0.2772	-0.277	0.4007	-0.5143	0.4561	0.4576	-0.2569	0.3701	-0.1199	0.1101	0.524	-0.823	0.489	0.2089	0.2135	-0.5465	-0.2702	-0.4685	0.7895	0.2647	0.6685	0.5795	0.7216	0.6909	0.8487	0.1449	0.5355	0.7853	0.4002	0.7641	0.7641	0.4368	0.7098	0.2152	0.1053	-0.4193
Acanthurus bahianus 2	-0.0989	0.2149	-0.4251	0.0469	-0.0538	0.2032	-0.0936	0.1839	0.2518	0.7408	-0.1923	-0.2288	-0.2377	0.3865	-0.3864	-0.0564	-0.3402	0.7321	0.4247	0.4261	0.5827	0.6214	0.0313	-0.0733	-0.5439	0.5399	0.1489	0.1528	-0.0513	0.1775	-0.1215	0.0809	0.0726	0.124	0.6389	0.4967	0.5757	0.3853	0.1641	0.0328	0.3277	0.03	0.3579	0.3579	0.5667	0.5704	0.6303	-0.3468	-0.2243
Acanthurus chirurgus 2	0.0617	-0.1943	-0.2854	-0.2237	-0.1712	0.3921	-0.2808	-0.2175	-0.2442	-0.0327	0.0312	-0.1706	-0.2477	-0.1223	0.1223	0.0619	-0.1715	0.436	-0.2533	-0.1769	-0.0881	-0.1194	-0.1177	-0.0906	-0.2961	0.5937	0.0338	0.038	0.1025	0.2647	-0.158	0.348	0.0817	0.6171	0.1218	0.25	0.2568	0.7621	-0.2278	0.0354	0.3472	-0.1753	0.4413	0.4413	0.0164	0.3646	-0.2287	-0.1538	-0.2584
Acanthurus coeruleus 2	-0.4174	0.314	-0.7209	-0.2747	-0.409	0.4474	0.2001	0.5071	0.4414	0.692	0.343	-0.5132	-0.1663	0.2915	-0.2914	0.1526	-0.4642	0.4377	0.1559	0.3501	0.7693	0.4992	0.4445	-0.1333	-0.7593	0.5895	-0.2308	-0.2264	0.0856	0.2025	-0.4326	0.1006	-0.1996	0.493	0.6111	0.6487	0.7722	0.7245	0.0686	0.2711	0.4956	-0.1537	0.4812	0.4812	0.5573	0.5934	0.3651	-0.0299	-0.248
Anisotremus virginicus 2	0.2419	-0.0461	0.7272	0.8041	-0.1987	0.0028	-0.3684	-0.1471	0.1836	0.0141	-0.3365	-0.1704	0.0766	-0.0229	0.0229	0.0405	-0.0376	-0.0594	0.5952	0.2228	0.0525	0.1924	0.0877	0.634	-0.0858	0.077	0.0879	0.089	-0.5797	-0.7134	-0.2268	0.502	0.7091	-0.0648	0.0149	-0.1533	-0.0908	0.0142	0.0954	0.0131	-0.1264	0.4581	-0.1218	-0.1218	-0.2396	0.2171	0.3134	-0.2774	-0.5183
Apogon townsendi 2	0.6326	-0.2832	-0.1132	-0.1111	-0.2788	-0.2043	-0.2763	-0.3169	-0.3635	-0.0225	-0.3535	-0.3331	-0.4314	-0.6056	0.6056	-0.6884	-0.2799	-0.2479	-0.0951	0.2299	-0.1257	0.354	-0.3532	-0.5386	0.1166	-0.3377	-0.4299	-0.432	0.3988	0.6156	-0.4472	-0.3966	-0.6126	0.3011	0.1183	0.1158	0.1372	-0.1513	-0.2644	-0.2783	-0.1111	0.1609	-0.0819	-0.0819	0.2132	-0.1628	0.438	0.064	0.2545
Canthigaster rostrata 2	-0.2894	-0.2938	0.0281	-0.1559	0.821	-0.4251	-0.0571	-0.2839	-0.2715	-0.3199	0.1993	0.7251	0.4984	0.2463	-0.2465	0.3267	0.4189	0.101	-0.2314	0.0434	-0.3529	-0.03	-0.182	0.1627	0.3821	-0.2131	0.4226	0.4201	0.2409	0.0501	0.7468	-0.2326	0.1244	-0.7883	-0.0752	-0.3632	-0.3791	-0.5951	0.4737	0.1084	-0.2151	0.0326	-0.1645	-0.1645	-0.031	-0.1543	-0.007	0.2294	0.1001
Carangoides ruber 2	0.0477	-0.2799	-0.2885	-0.2293	-0.0398	0.3574	-0.3442	-0.3416	-0.3393	-0.0205	0.011	-0.0648	-0.2472	-0.0739	0.0739	0.1073	-0.1125	0.5573	-0.2446	-0.1043	-0.1288	-0.0333	-0.2441	-0.0625	-0.2885	0.6562	0.1242	0.1288	0.1522	0.3188	-0.0547	0.3598	0.1077	0.5383	0.2096	0.2721	0.2826	0.7205	-0.0895	0.0763	0.3734	-0.1117	0.4888	0.4888	0.1065	0.4064	-0.0999	-0.146	-0.2455
Cephalopholis cruentata 2	-0.5344	0.0966	-0.4652	-0.1938	0.4934	0.2855	0.0889	-0.0115	0.0343	0.2759	0.2145	0.3499	0.0089	0.6274	-0.6275	0.5064	0.0088	0.8426	-0.0167	-0.181	0.0453	-0.0858	-0.1802	0.1846	-0.2991	0.4204	0.6864	0.6889	0.0106	0.1914	0.5636	0.1871	0.1781	-0.2232	0.4337	0.3132	0.2523	0.2143	0.4412	0.3343	0.4627	-0.0163	0.5219	0.5219	0.4412	0.4422	0.0516	0.0649	-0.0745
Chaetodon capistratus 2	-0.673	0.5106	0.0179	0.1698	0.2468	0.2949	0.6188	0.3137	0.4145	0.6039	0.192	0.2921	-0.061	0.8526	-0.8526	0.6144	0.312	0.4529	0.4858	0.0922	0.4304	0.0953	-0.1193	0.4059	-0.2896	0.3402	0.4504	0.4536	-0.3558	-0.3743	0.4198	0.2772	0.1883	-0.3574	0.4298	0.4147	0.3567	-0.1071	0.7939	0.4947	0.3902	0.2175	0.295	0.295	0.5615	0.1454	0.4119	0.0887	0.286
Chaetodon ocellatus 2	-0.1391	-0.3695	-0.0524	-0.3461	0.7099	-0.391	-0.0621	-0.4135	-0.4919	-0.1047	0.06	0.6802	0.229	0.1679	-0.168	0.1649	0.5566	0.2447	-0.2455	0.3624	-0.1904	0.3106	-0.4316	-0.1488	0.3087	0.2069	0.1572	0.1583	0.4406	0.2697	0.589	-0.2381	-0.0748	-0.4637	0.0568	-0.134	-0.1045	-0.3688	0.5071	0.0309	-0.1448	-0.0799	-0.0863	-0.0863	0.1743	-0.183	0.2629	0.0234	0.3351
Chaetodon striatus 2	-0.2641	0.5859	-0.408	0.0192	-0.2352	0.174	0.397	0.6219	0.5858	0.8962	-0.0545	-0.3221	-0.2129	0.4841	-0.484	-0.0776	-0.2776	0.346	0.5218	0.4259	0.8415	0.5689	0.2743	-0.1695	-0.4929	0.2626	-0.0907	-0.0884	-0.1307	0.0147	-0.2184	-0.1295	-0.1802	0.035	0.5183	0.5137	0.5744	0.1383	0.1608	0.0519	0.2371	-0.0531	0.15	0.15	0.5858	0.2809	0.5809	-0.2199	0.0886
Coryphopterus glaucofraenum 2	-0.3139	0.5754	-0.2714	0.2234	-0.566	0.8942	0.3985	0.3536	0.4968	0.6789	0.0733	-0.5366	-0.6738	0.4145	-0.4144	0.2959	-0.4371	0.5228	0.4519	-0.3213	0.4425	-0.1556	-0.057	0.2633	-0.7603	0.4202	0.2475	0.2518	-0.4671	-0.0742	-0.335	0.5745	-0.0105	0.6	0.6101	0.8442	0.7503	0.6883	0.1721	0.4725	0.8233	0.293	0.7609	0.7609	0.6328	0.538	0.2443	0.1	-0.0363
Coryphopterus personatus 2	-0.3939	0.2481	-0.094	0.3102	-0.5351	0.8577	0.3588	0.0061	0.3022	0.3514	0.3825	-0.5073	-0.637	0.193	-0.1928	0.5315	-0.4064	0.1771	0.3592	-0.3037	0.1255	-0.1557	-0.2567	0.5728	-0.681	0.0151	0.2174	0.2191	-0.3317	-0.0343	-0.3696	0.6194	-0.1928	0.4672	0.7612	0.8577	0.7615	0.3765	0.6092	0.8851	0.9037	0.8259	0.8481	0.8481	0.8107	0.4821	0.5617	0.752	0.016
Elacatinus xanthiprora 2	-0.2569	-0.2388	-0.3507	-0.3012	-0.3408	0.6293	0.0471	-0.2673	-0.2252	-0.1897	0.5613	-0.2941	-0.3638	-0.2133	0.2134	0.4174	-0.2297	0.079	-0.3898	-0.3571	-0.2325	-0.3023	-0.2078	0.1409	-0.3975	0.2129	-0.0508	-0.0487	0.2129	0.3614	-0.2809	0.4062	-0.3282	0.684	0.3451	0.5128	0.4727	0.6213	0.1951	0.6071	0.6633	0.264	0.7079	0.7079	0.3619	0.3143	-0.0462	0.6614	-0.0355
Equetus punctatus 2	0.1172	-0.158	-0.232	-0.0391	-0.0624	-0.0104	-0.2283	-0.1768	-0.12	0.4269	-0.1534	-0.1743	-0.2406	-0.0023	0.0024	-0.1652	-0.1578	0.3625	0.2199	0.6142	0.3254	0.7551	-0.197	-0.1669	-0.3032	0.3711	-0.1548	-0.1518	0.2261	0.3194	-0.235	-0.0326	-0.1613	0.1711	0.5424	0.3769	0.4913	0.1798	0.2581	0.0472	0.1661	0.1808	0.2129	0.2129	0.5204	0.3179	0.7941	-0.125	-0.0436
Haemulon flavolineatum 2	-0.3106	0.1673	-0.2723	0.1539	-0.0004	0.3296	-0.0573	0.2092	0.3559	-0.0134	0.2362	-0.1646	0.1045	0.2334	-0.2334	0.3041	-0.4843	0.2809	0.0449	-0.4951	-0.05	-0.4035	0.3118	0.3963	-0.3145	-0.1777	0.4887	0.4867	-0.266	-0.0707	0.0839	0.2207	0.2575	-0.0772	0.1816	0.0849	0.0252	0.2127	-0.0582	0.2476	0.3104	0.1419	0.342	0.342	0.0299	0.463	-0.2685	0.2324	-0.502
Haemulon macrostomum 2	0.0512	-0.158	-0.232	-0.1992	-0.2254	0.4163	-0.2283	-0.1768	-0.2069	-0.0713	0.0602	-0.1945	-0.2406	-0.1411	0.1411	0.081	-0.1578	0.347	-0.2578	-0.2362	-0.1006	-0.1999	-0.0778	-0.06	-0.278	0.5496	0.0034	0.0074	0.0563	0.197	-0.1864	0.3725	0.0873	0.6391	0.0591	0.2261	0.2233	0.7577	-0.2581	0.0472	0.3361	-0.1774	0.4153	0.4153	-0.0416	0.3179	-0.3054	-0.125	-0.2451
Haemulon plumierii 2	-0.4317	-0.0687	-0.3228	-0.1044	-0.3829	0.5807	0.2727	-0.1058	0.0449	0.1025	0.6514	-0.3886	-0.3827	-0.0398	0.0399	0.4924	-0.3107	-0.0398	-0.0443	-0.0728	0.0366	0.0333	-0.1645	0.3081	-0.5212	-0.0568	-0.0788	-0.0783	0.1417	0.2703	-0.3563	0.2996	-0.4844	0.4177	0.6737	0.7007	0.6865	0.2778	0.6077	0.8534	0.7244	0.636	0.7042	0.7042	0.7532	0.3447	0.532	0.9348	0.0778
Haemulon sciurus 2	0.0983	-0.2253	-0.2307	-0.0022	-0.1682	-0.008	-0.2918	-0.169	-0.0749	0.3794	-0.0436	-0.2995	-0.174	-0.0961	0.0962	-0.1356	-0.262	0.2441	0.2241	0.6951	0.357	0.8379	-0.0642	-0.083	-0.3711	0.3106	-0.2644	-0.262	0.2426	0.2836	-0.3829	-0.0083	-0.1662	0.2161	0.5894	0.3768	0.5328	0.2154	0.273	0.1253	0.1673	0.2703	0.2178	0.2178	0.5145	0.3909	0.8688	-0.0136	-0.1842
Halichoeres bivittatus 2	-0.1059	-0.078	-0.3131	-0.2682	-0.1174	0.4647	-0.0626	-0.1589	-0.1994	0.1181	0.1049	-0.0804	-0.3153	0.0614	-0.0614	0.1997	-0.0391	0.5124	-0.1909	-0.1396	0.011	-0.087	-0.2148	-0.0746	-0.3416	0.6858	0.0815	0.0867	0.0911	0.2481	-0.0585	0.3708	0.0121	0.5706	0.228	0.3921	0.3786	0.7207	-0.0055	0.1699	0.4579	-0.1441	0.5206	0.5206	0.2052	0.3306	-0.1098	-0.0883	-0.0625
Holacanthus ciliaris 2	-0.3171	0.2174	-0.1979	0.2721	-0.4638	0.2613	-0.0913	0.4751	0.631	0.5458	0.2492	-0.5866	0.1706	0.2258	-0.2256	0.2099	-0.4984	0.1846	0.4984	0.5657	0.782	0.6535	0.7396	0.3668	-0.7162	0.4244	-0.2341	-0.2311	-0.2626	-0.3724	-0.5589	0.3114	0.3207	0.2382	0.5065	0.3315	0.5384	0.5522	0.1191	0.2655	0.2272	0.1384	0.2143	0.2143	0.234	0.6872	0.5075	-0.1222	-0.727
Hypoplectrus nigricans 2	-0.4171	0.5433	-0.2459	0.1174	-0.3996	0.7207	0.6452	0.3397	0.4485	0.3001	0.3285	-0.3639	-0.544	0.2882	-0.2881	0.3555	-0.3717	0.0455	0.1894	-0.6676	0.0769	-0.5525	-0.1121	0.2738	-0.4238	-0.3193	0.2991	0.2978	-0.3247	0.0421	-0.1298	0.2608	-0.3555	0.2468	0.4074	0.6391	0.4493	0.1161	0.2626	0.5982	0.7032	0.4407	0.5976	0.5976	0.5812	0.1645	0.038	0.6641	0.2767
Hypoplectrus puella 2	-0.5378	0.2428	-0.5428	-0.36	-0.2021	0.6789	0.5092	0.1414	0.0989	0.319	0.5041	-0.1583	-0.4476	0.2982	-0.2981	0.4741	-0.12	0.3528	-0.1335	-0.3024	0.1609	-0.2135	-0.1954	0.0109	-0.4943	0.3284	0.1236	0.1267	0.0932	0.3248	-0.038	0.2596	-0.4131	0.4522	0.4984	0.7236	0.6372	0.4828	0.3785	0.6047	0.7577	0.1053	0.724	0.724	0.6661	0.269	0.0855	0.5	0.2936
Lucayablennius zingaro 2	-0.3976	0.9645	-0.232	0.1209	-0.2254	0.3309	0.8094	0.8839	0.8078	0.7519	-0.0327	-0.1945	-0.2406	0.6596	-0.6595	0.0522	-0.1578	0.1609	0.4929	-0.2362	0.6448	-0.1722	0.2947	-0.0504	-0.2982	-0.0707	0.18	0.1802	-0.4609	-0.2486	0.0311	-0.0771	-0.1194	-0.103	0.1557	0.3769	0.268	-0.0514	0	0.0472	0.2411	-0.148	0.0739	0.0739	0.333	-0.0122	-0.0305	-0.125	0.3323
Lutjanus griseus 2	0.0875	0.073	0.5965	0.8416	-0.2431	0.191	-0.3127	-0.0285	0.3464	0.066	-0.2246	-0.2583	0.0558	0.0985	-0.0984	0.179	-0.2162	0.0616	0.6257	0.019	0.0767	0.0273	0.1888	0.769	-0.2462	0.0476	0.2595	0.2602	-0.6917	-0.7329	-0.2158	0.6068	0.7625	-0.0403	0.116	-0.0486	-0.018	0.1345	0.0971	0.1447	0.0501	0.5097	0.0542	0.0542	-0.1703	0.3912	0.224	-0.1712	-0.6506
Malacoctenus triangulatus 2	0.1273	-0.2388	-0.3507	-0.1802	-0.2176	0.3068	-0.3451	-0.2673	-0.2471	0.2688	-0.0705	-0.2788	-0.3638	-0.1084	0.1085	-0.0637	-0.2386	0.5364	-0.0287	0.2857	0.1699	0.4197	-0.2078	-0.1715	-0.4394	0.696	-0.1144	-0.1092	0.2134	0.3904	-0.3185	0.2569	-0.056	0.6125	0.4547	0.4558	0.5402	0.7086	0	0.0714	0.3796	0.0026	0.4749	0.4749	0.3619	0.4807	0.3694	-0.189	-0.2182
Microspathodon chrysurus 2	0.158	-0.3313	0.0074	-0.3076	0.8617	-0.7803	-0.3013	-0.2053	-0.3905	-0.5305	-0.1783	0.7506	0.6435	-0.0415	0.0413	-0.2276	0.3879	-0.0474	-0.4659	-0.0521	-0.4724	-0.1607	-0.0056	-0.3184	0.7302	-0.346	0.249	0.2447	0.3593	0.1834	0.7421	-0.5999	0.1354	-0.7876	-0.5966	-0.8098	-0.8196	-0.6503	-0.2598	-0.5625	-0.6907	-0.5094	-0.6113	-0.6113	-0.5869	-0.4232	-0.5463	-0.2759	0.0579
Pomacanthus arcuatus 2	-0.166	-0.1722	0.1135	0.4252	-0.3543	0.2092	-0.299	-0.0512	0.261	0.1538	0.2705	-0.454	0.1002	-0.0405	0.0406	0.3071	-0.3825	-0.002	0.398	0.4652	0.2998	0.533	0.3242	0.6119	-0.5215	0.1483	-0.1316	-0.1303	-0.1931	-0.3208	-0.4927	0.4348	0.2937	0.1579	0.5269	0.2565	0.4204	0.3003	0.3924	0.4755	0.2496	0.5896	0.2769	0.2769	0.2637	0.5914	0.6811	0.2625	-0.6655
Pseudupeneus maculatus 2	-0.1792	-0.1978	-0.1362	0.1009	-0.2965	0.4334	0.0042	-0.3235	-0.0828	0.1848	0.3237	-0.3416	-0.4404	-0.0728	0.0729	0.3167	-0.2792	0.113	0.1596	0.1729	0.0325	0.3138	-0.356	0.3256	-0.4776	0.043	-0.0221	-0.0208	0.0971	0.2478	-0.3504	0.3284	-0.3191	0.3351	0.7567	0.659	0.6765	0.1997	0.656	0.7061	0.6184	0.7631	0.6334	0.6334	0.7809	0.4028	0.8384	0.6862	0.002
Scarus iseri 2	-0.2534	0.0699	-0.5151	-0.1817	-0.3442	0.6985	0.0415	-0.0109	0.0405	0.3938	0.2353	-0.3794	-0.4962	0.1515	-0.1514	0.2776	-0.3604	0.5992	0.0103	-0.0906	0.2389	0.0663	-0.139	0.0397	-0.6747	0.628	0.0893	0.0944	0.0284	0.319	-0.2836	0.4385	-0.1349	0.6861	0.6121	0.7349	0.731	0.8299	0.1649	0.4295	0.7464	0.1223	0.7873	0.7873	0.5857	0.5951	0.2399	0.1469	-0.1427
Scomberomorus regalis 2	-0.1172	-0.0737	0.2819	0.5048	-0.4347	0.7401	-0.0686	-0.3409	0.0373	-0.0915	0.2064	-0.3751	-0.464	-0.0531	0.0531	0.5022	-0.2959	0.1113	0.2398	-0.4555	-0.2702	-0.3855	-0.3159	0.7667	-0.4523	0.0423	0.3189	0.3204	-0.4386	-0.2383	-0.297	0.8322	0.2209	0.4651	0.4308	0.4817	0.3863	0.4294	0.3886	0.7079	0.6873	0.8201	0.7028	0.7028	0.3222	0.4554	0.2288	0.5647	-0.2898
Serranus tigrinus 2	-0.3201	0.0864	-0.2763	0.2252	-0.1286	0.371	0.0549	0.0334	0.2925	0.1774	0.3151	-0.3113	-0.185	0.1606	-0.1605	0.3159	-0.5491	0.1709	0.2293	-0.1964	0.0291	-0.0224	0.0034	0.4417	-0.4441	-0.3654	0.3478	0.3452	-0.1258	0.1302	-0.1161	0.1677	-0.1344	-0.0612	0.6282	0.4416	0.3967	-0.0121	0.4227	0.5804	0.518	0.654	0.5204	0.5204	0.592	0.4807	0.4733	0.6614	-0.236
Serranus tortugarum 2	-0.4775	0.7883	-0.4535	-0.0765	-0.1839	0.5386	0.6947	0.6911	0.6116	0.6034	0.1355	-0.1794	-0.3233	0.6064	-0.6063	0.2107	-0.2368	0.3738	0.2297	-0.4618	0.4409	-0.3671	0.1647	-0.0407	-0.4057	0.09	0.3157	0.3167	-0.3219	-0.0115	0.0853	0.0673	-0.1571	0.1083	0.2454	0.4973	0.3601	0.2385	0	0.1962	0.4816	-0.1612	0.3745	0.3745	0.3992	0.1643	-0.194	0.0305	0.2428
Sparisoma aurofrenatum 2	-0.22	-0.0442	-0.5805	-0.3427	0.6138	-0.2095	-0.2467	0.0922	-0.0092	0.115	-0.0003	0.3568	0.3703	0.3731	-0.3732	0.0322	-0.1109	0.6728	-0.1921	0.0296	0.0648	0.1121	0.1813	-0.1966	-0.0378	0.2281	0.4531	0.453	0.2363	0.3276	0.526	-0.2744	0.1911	-0.408	0.0957	-0.1441	-0.1118	0.0562	-0.0927	-0.2217	-0.0561	-0.4417	0.0464	0.0464	0.0065	0.3174	-0.1911	-0.3128	-0.2982
Sparisoma viride 2	-0.3515	0.4755	-0.7782	-0.386	-0.1521	0.3599	0.3744	0.5434	0.3758	0.6376	0.1522	-0.2514	-0.2525	0.4012	-0.4011	0.0097	-0.3477	0.5061	0.0352	-0.0301	0.5541	0.1198	0.2196	-0.3603	-0.4868	0.3411	0.0395	0.0419	0.0929	0.3694	-0.0753	-0.1343	-0.3264	0.2652	0.3978	0.529	0.5207	0.4372	-0.0848	0.0603	0.4124	-0.3364	0.3807	0.3807	0.4902	0.3227	0.0407	-0.0943	0.0944
Stegastes adustus 2	-0.4117	-0.157	-0.2746	-0.4665	0.4	-0.1004	0.3715	-0.1405	-0.2428	-0.2732	0.5386	0.397	0.1145	0.0586	-0.0587	0.3407	0.2652	-0.1989	-0.4505	-0.1678	-0.3113	-0.2074	-0.2555	-0.0747	0.2257	-0.4005	0.091	0.0879	0.4466	0.3854	0.4091	-0.3193	-0.5348	-0.342	0.0628	0.0352	-0.0376	-0.4622	0.4865	0.3887	0.1103	0.1061	0.0923	0.0923	0.304	-0.2875	0.0014	0.742	0.5101
Stegastes diencaeus 2	0.0512	-0.158	-0.232	-0.1992	-0.2254	0.4163	-0.2283	-0.1768	-0.2069	-0.0713	0.0602	-0.1945	-0.2406	-0.1411	0.1411	0.081	-0.1578	0.347	-0.2578	-0.2362	-0.1006	-0.1999	-0.0778	-0.06	-0.278	0.5496	0.0034	0.0074	0.0563	0.197	-0.1864	0.3725	0.0873	0.6391	0.0591	0.2261	0.2233	0.7577	-0.2581	0.0472	0.3361	-0.1774	0.4153	0.4153	-0.0416	0.3179	-0.3054	-0.125	-0.2451
Stegastes partitus 2	-0.5929	0.754	-0.2374	0.3498	-0.2482	0.7309	0.6024	0.5171	0.721	0.8527	0.1357	-0.2874	-0.4602	0.788	-0.7879	0.4826	-0.3219	0.5878	0.6825	-0.202	0.5777	-0.037	-0.0015	0.4549	-0.7131	0.2235	0.5049	0.5076	-0.5703	-0.2425	-0.0106	0.4427	0.0741	0.0589	0.7335	0.7972	0.6934	0.263	0.542	0.5953	0.7634	0.4284	0.661	0.661	0.8033	0.5145	0.4811	0.1969	0.0453
Stegastes planifrons 2	0.1092	-0.3226	-0.5851	-0.5913	0.0773	0.0992	-0.1099	-0.3198	-0.4736	-0.3419	0.1857	-0.0084	-0.2658	-0.365	0.365	-0.1536	-0.2346	0.0684	-0.6691	-0.4463	-0.4804	-0.3499	-0.3452	-0.4614	0.0774	-0.2395	0.031	0.0287	0.5655	0.8608	0.0485	-0.2856	-0.6226	0.2844	0.0443	0.1364	0.0449	0.1136	-0.2248	0.019	0.2261	-0.1087	0.3085	0.3085	0.1736	-0.032	-0.2824	0.4271	0.2279
Synodus intermedius 2	-0.411	0.2927	-0.4583	-0.1061	-0.3283	0.4699	0.4808	0.2223	0.2837	0.5828	0.3624	-0.3698	-0.4754	0.2523	-0.2522	0.2479	-0.3033	0.1729	0.2383	0.1443	0.4324	0.306	-0.1243	0.03	-0.5565	0.036	-0.0649	-0.0637	0.076	0.2975	-0.2852	0.0535	-0.5549	0.2583	0.7591	0.7988	0.7861	0.1476	0.5563	0.6025	0.6382	0.4285	0.5672	0.5672	0.9272	0.2921	0.7296	0.5613	0.29
Thalassoma bifasciatum 2	-0.184	-0.259	-0.3226	-0.4538	0.5612	-0.7366	-0.2147	0.1681	-0.049	-0.053	0.1991	0.3926	0.8269	0.0848	-0.0849	-0.082	0.2129	-0.0307	-0.2659	0.7302	0.2729	0.6558	0.5418	-0.3274	0.2363	0.0967	-0.261	-0.2621	0.5155	0.1142	0.2911	-0.6077	0.0414	-0.5823	-0.1654	-0.4929	-0.2761	-0.2947	-0.0102	-0.3314	-0.5813	-0.5598	-0.5287	-0.5287	-0.2499	-0.0669	0.029	-0.2824	-0.2115
There are 1 missing values.		The correlations are estimated by Pairwise method.
Correlation Probability
	Hard coral reef	Hard coral bleached	Recently killed coral	Anemone	Soft coral reef	Sponges	Worms	Zoanthid	Rubble	Sand reef	Rock	Calcifying algae reef	Macroalgae reef	Soft Substrate	Hard substrate	Thalassia	Syringodium	Sand seagrass	Hard coral seagrass	Soft coral seagrass	Sponge seagrass	Macroalgae seagrass	Calcifying algae seagrass	Seagrass Biomass (g/m2)	Distance Reef-Mangrove (m)	Temp °C reef	Sal psu reef	TDS mg/L reef	ODO mg/L reef	pH reef	Turbidity FNU reef	Chlorophyll µg/L reef	BGA-PE µg/L reef	fDOM RFU reef	Reef Biodiversity M1	Reef Biodiversity M2	Mangrove M1	Mangrove M2	Seagrass M1	Seagrass M2	Trophic level (Fish Base)	Trophic level Avg all species	Vulnerability (Fish Base)	Vulnerability (Fish Base)/10	Resilience high (No of species, Fish Base)	Resilience medium	Resilience low	Resilience very low	Resilience high %
Hard coral reef	<.0001	0.3977	0.3576	0.6196	0.7318	0.3847	0.1212	0.2305	0.2308	0.3455	0.0223	0.7434	0.4974	0.0437	0.0437	0.0063	0.7648	0.4935	0.8363	0.7835	0.2114	0.8396	0.3475	0.3204	0.2454	0.3403	0.6544	0.6494	0.8636	0.5343	0.5512	0.5779	0.8675	0.6704	0.3028	0.3486	0.2932	0.6204	0.052	0.0578	0.2601	0.9898	0.343	0.343	0.2606	0.4296	0.7437	0.3381	0.9377
Hard coral bleached	0.3977	<.0001	0.922	0.3609	0.494	0.301	0.0332	0.0099	0.0047	0.0242	0.7424	0.5572	0.4639	0.0551	0.0552	0.8199	0.6359	0.6244	0.0649	0.4726	0.1035	0.592	0.5576	0.7008	0.3953	0.8631	0.4602	0.4596	0.0661	0.288	0.995	0.7902	0.8643	0.8042	0.6404	0.3313	0.522	0.936	0.9143	0.8185	0.4815	0.9398	0.7694	0.7694	0.4378	0.8647	0.9353	0.7087	0.6007
Recently killed coral	0.3576	0.922	<.0001	0.0779	0.9709	0.7784	0.8279	0.4276	0.7479	0.4699	0.2485	0.5841	0.9201	0.8069	0.807	0.9533	0.2552	0.4472	0.433	0.7131	0.3679	0.4594	0.3908	0.2974	0.3086	0.7466	0.7371	0.7371	0.1884	0.0702	0.7782	0.3759	0.188	0.6697	0.2873	0.3676	0.259	0.3949	0.9154	0.7487	0.4749	0.4593	0.4171	0.4171	0.2541	0.3569	0.8049	0.5804	0.8106
Anemone	0.6196	0.3609	0.0779	<.0001	0.4157	0.3531	0.8719	0.9623	0.2949	0.4557	0.189	0.4593	0.3483	0.5861	0.5862	0.9317	0.548	0.6579	0.0076	0.5414	0.8747	0.6719	0.7072	0.0565	0.5442	0.8497	0.2471	0.2464	0.0025	0.0694	0.6796	0.0959	0.1042	0.991	0.6229	0.6619	0.8458	0.9623	0.8086	0.7778	0.5946	0.078	0.6772	0.6772	0.8749	0.49	0.4531	0.6362	0.4741
Soft coral reef	0.7318	0.494	0.9709	0.4157	<.0001	0.0993	0.7717	0.5637	0.336	0.3916	0.9624	0.0006	0.1019	0.5257	0.5253	0.7629	0.0929	0.6248	0.3587	0.8748	0.3913	0.883	0.7162	0.7404	0.1229	0.9728	0.3404	0.3422	0.4448	0.8621	0.001	0.3529	0.5758	0.0126	0.3405	0.1134	0.1074	0.1574	0.7014	0.4982	0.2374	0.2853	0.3219	0.3219	0.4113	0.432	0.393	0.5914	0.6935
Sponges	0.3847	0.301	0.7784	0.3531	0.0993	<.0001	0.4363	0.7117	0.278	0.2073	0.5971	0.1258	0.0576	0.4484	0.4487	0.2216	0.2246	0.3137	0.2503	0.317	0.5404	0.559	0.7314	0.1482	0.0164	0.5	0.454	0.4487	0.1814	0.7173	0.3325	0.0255	0.9327	0.1025	0.0495	0.0036	0.0229	0.0729	0.3591	0.0369	0.0003	0.0937	0.0025	0.0025	0.0587	0.1022	0.385	0.305	0.7362
Worms	0.1212	0.0332	0.8279	0.8719	0.7717	0.4363	<.0001	0.0776	0.1603	0.2592	0.4318	0.9291	0.6861	0.1431	0.1432	0.3779	0.6073	0.7626	0.5979	0.5617	0.3162	0.4851	0.8253	0.9165	0.7608	0.8027	0.9062	0.9057	0.528	0.5457	0.7251	0.9506	0.4689	0.7804	0.8601	0.3868	0.5756	0.6452	0.392	0.3948	0.5034	0.9385	0.8244	0.8244	0.377	0.5276	0.9051	0.4851	0.0953
Zoanthid	0.2305	0.0099	0.4276	0.9623	0.5637	0.7117	0.0776	<.0001	0.0037	0.0606	0.706	0.525	0.7942	0.1356	0.1356	0.8704	0.5953	0.9437	0.3163	0.8751	0.0145	0.8217	0.0509	0.902	0.4016	0.9986	0.8757	0.8758	0.4287	0.4402	0.809	0.6884	0.9329	0.7512	0.8021	0.6122	0.581	0.932	0.8486	1	0.8807	0.4587	0.8471	0.8471	0.7017	0.8387	0.9191	0.6754	0.9496
Rubble	0.2308	0.0047	0.7479	0.2949	0.336	0.278	0.1603	0.0037	<.0001	0.0176	0.8556	0.2772	0.8306	0.0729	0.073	0.5808	0.314	0.6084	0.0388	0.9448	0.0177	0.8789	0.1338	0.3813	0.123	0.9159	0.6606	0.6591	0.0792	0.1841	0.6182	0.6005	0.6053	0.9069	0.3526	0.2943	0.3095	0.6829	0.7793	0.5571	0.4205	0.7735	0.641	0.641	0.4058	0.3482	0.5986	0.8304	0.63
Sand reef	0.3455	0.0242	0.4699	0.4557	0.3916	0.2073	0.2592	0.0606	0.0176	<.0001	0.8864	0.2862	0.3964	0.0637	0.0638	0.7353	0.311	0.1732	0.0312	0.7213	0.0075	0.4316	0.5259	0.6666	0.0503	0.4336	0.6272	0.6218	0.2181	0.587	0.602	0.5901	0.8521	0.8044	0.0824	0.066	0.0673	0.4474	0.5597	0.5455	0.2096	0.6997	0.3284	0.3284	0.0782	0.2013	0.1629	0.6703	0.8477
Rock	0.0223	0.7424	0.2485	0.189	0.9624	0.5971	0.4318	0.706	0.8556	0.8864	<.0001	0.9836	0.4245	0.7605	0.7605	0.0512	0.8696	0.7682	0.3557	0.5939	0.6048	0.7036	0.356	0.6692	0.4152	0.5506	0.5064	0.509	0.3536	0.8474	0.8842	0.8448	0.5106	0.7554	0.4792	0.5172	0.3434	0.4763	0.1768	0.0619	0.4078	0.9817	0.4234	0.4234	0.4556	0.6208	0.8535	0.0622	0.8785
Calcifying algae reef	0.7434	0.5572	0.5841	0.4593	0.0006	0.1258	0.9291	0.525	0.2772	0.2862	0.9836	<.0001	0.1471	0.5757	0.5753	0.6608	0.0076	0.9506	0.3393	0.9974	0.3029	0.6294	0.5436	0.7954	0.0523	0.953	0.464	0.4652	0.5535	0.8662	0.0008	0.4725	0.5986	0.0282	0.1678	0.0933	0.0685	0.1168	0.6258	0.5535	0.2084	0.2917	0.2426	0.2426	0.2952	0.1763	0.2625	0.6443	0.371
Macroalgae reef	0.4974	0.4639	0.9201	0.3483	0.1019	0.0576	0.6861	0.7942	0.8306	0.3964	0.4245	0.1471	<.0001	0.8367	0.8365	0.6961	0.2572	0.6571	0.3528	0.2093	0.8893	0.4657	0.1299	0.8415	0.3522	0.7662	0.6564	0.655	0.3754	0.6439	0.2855	0.3432	0.4764	0.1061	0.2607	0.0522	0.1885	0.5098	0.9868	0.5377	0.0867	0.1149	0.1191	0.1191	0.139	0.6475	0.3893	0.5659	0.5353
Soft Substrate	0.0437	0.0551	0.8069	0.5861	0.5257	0.4484	0.1431	0.1356	0.0729	0.0637	0.7605	0.5757	0.8367	<.0001	<.0001	0.1339	0.7808	0.1101	0.1592	0.8947	0.1628	0.9418	0.6533	0.2867	0.3709	0.3977	0.1074	0.1055	0.1853	0.2245	0.2386	0.5194	0.3079	0.2825	0.4041	0.4579	0.5535	0.9863	0.1819	0.4201	0.4108	0.9796	0.5473	0.5473	0.3545	0.4744	0.7487	0.7389	0.9779
Hard substrate	0.0437	0.0552	0.807	0.5862	0.5253	0.4487	0.1432	0.1356	0.073	0.0638	0.7605	0.5753	0.8365	<.0001	<.0001	0.1339	0.7804	0.1101	0.1593	0.8947	0.163	0.9417	0.6534	0.2868	0.3712	0.3977	0.1074	0.1054	0.1854	0.2245	0.2383	0.5195	0.3078	0.2823	0.4044	0.4582	0.5538	0.9866	0.1819	0.4202	0.411	0.9798	0.5475	0.5475	0.3547	0.4747	0.7489	0.7388	0.9777
Thalassia	0.0063	0.8199	0.9533	0.9317	0.7629	0.2216	0.3779	0.8704	0.5808	0.7353	0.0512	0.6608	0.6961	0.1339	0.1339	<.0001	0.5856	0.461	0.7918	0.9811	0.6798	0.8737	0.8576	0.0464	0.2855	0.2333	0.4253	0.4196	0.6151	0.3213	0.5536	0.1152	0.4558	0.892	0.3049	0.3663	0.3521	0.4723	0.009	0.0092	0.1551	0.452	0.1769	0.1769	0.352	0.3465	0.6808	0.2386	0.7377
Syringodium	0.7648	0.6359	0.2552	0.548	0.0929	0.2246	0.6073	0.5953	0.314	0.311	0.8696	0.0076	0.2572	0.7808	0.7804	0.5856	<.0001	0.5244	0.4315	0.7632	0.4682	0.732	0.5711	0.8668	0.0688	0.7421	0.9434	0.9451	0.6707	0.509	0.0754	0.7214	0.7187	0.2079	0.1161	0.1646	0.1534	0.2094	0.5277	0.7303	0.2254	0.3676	0.1987	0.1987	0.2687	0.0659	0.3533	0.73	0.1943
Sand seagrass	0.4935	0.6244	0.4472	0.6579	0.6248	0.3137	0.7626	0.9437	0.6084	0.1732	0.7682	0.9506	0.6571	0.1101	0.1101	0.461	0.5244	<.0001	0.3595	0.8851	0.5527	0.7894	0.7658	0.4639	0.1821	0.1502	0.057	0.0551	0.4908	0.9697	0.5312	0.3262	0.2951	0.9409	0.1244	0.2821	0.3209	0.287	0.4881	0.6018	0.1941	0.7346	0.1332	0.1332	0.2435	0.0542	0.4769	0.5629	0.3753
Hard coral seagrass	0.8363	0.0649	0.433	0.0076	0.3587	0.2503	0.5979	0.3163	0.0388	0.0312	0.3557	0.3393	0.3528	0.1592	0.1593	0.7918	0.4315	0.3595	<.0001	0.957	0.1715	0.8094	0.8725	0.1374	0.1945	0.779	0.3277	0.325	0.0048	0.0928	0.6289	0.1911	0.2246	0.9753	0.256	0.2766	0.3504	0.7801	0.5756	0.6338	0.3866	0.1981	0.5307	0.5307	0.3688	0.2976	0.1859	0.5376	0.589
Soft coral seagrass	0.7835	0.4726	0.7131	0.5414	0.8748	0.317	0.5617	0.8751	0.9448	0.7213	0.5939	0.9974	0.2093	0.8947	0.8947	0.9811	0.7632	0.8851	0.957	<.0001	0.2133	0.0003	0.25	0.7173	0.7943	0.2523	0.1428	0.1452	0.3372	0.9512	0.6115	0.6236	0.9185	0.8977	0.7591	0.7882	0.6895	0.7747	0.7005	0.8665	0.4679	0.5477	0.526	0.526	0.9852	0.735	0.2494	0.5733	0.4771
Sponge seagrass	0.2114	0.1035	0.3679	0.8747	0.3913	0.5404	0.3162	0.0145	0.0177	0.0075	0.6048	0.3029	0.8893	0.1628	0.163	0.6798	0.4682	0.5527	0.1715	0.2133	<.0001	0.1372	0.0643	0.8568	0.0864	0.3047	0.6451	0.6509	0.5468	0.4736	0.4226	0.8865	0.8804	0.8312	0.247	0.2681	0.1325	0.384	0.7	0.6599	0.5722	0.7774	0.739	0.739	0.3191	0.2906	0.2867	0.6227	0.585
Macroalgae seagrass	0.8396	0.592	0.4594	0.6719	0.883	0.559	0.4851	0.8217	0.8789	0.4316	0.7036	0.6294	0.4657	0.9418	0.9417	0.8737	0.732	0.7894	0.8094	0.0003	0.1372	<.0001	0.2888	0.7438	0.4469	0.2672	0.2322	0.2353	0.4148	0.8175	0.4078	0.7128	0.9783	0.8819	0.3731	0.8169	0.3719	0.5565	0.7243	0.9782	0.792	0.7929	0.8784	0.8784	0.6236	0.3875	0.0912	0.635	0.3417
Calcifying algae seagrass	0.3475	0.5576	0.3908	0.7072	0.7162	0.7314	0.8253	0.0509	0.1338	0.5259	0.356	0.5436	0.1299	0.6533	0.6534	0.8576	0.5711	0.7658	0.8725	0.25	0.0643	0.2888	<.0001	0.9411	0.4964	0.7048	0.3523	0.3527	0.9549	0.5287	0.5492	0.6368	0.7528	0.8468	0.9753	0.7757	0.852	0.6021	0.6457	0.862	0.6268	0.2833	0.5656	0.5656	0.6679	0.5739	0.8422	0.64	0.2247
Seagrass Biomass (g/m2)	0.3204	0.7008	0.2974	0.0565	0.7404	0.1482	0.9165	0.902	0.3813	0.6666	0.6692	0.7954	0.8415	0.2867	0.2868	0.0464	0.8668	0.4639	0.1374	0.7173	0.8568	0.7438	0.9411	<.0001	0.2415	0.5458	0.1978	0.195	0.0609	0.0594	0.9971	0.0064	0.0781	0.9923	0.2876	0.4276	0.4816	0.5313	0.0976	0.0663	0.1929	0.0521	0.2107	0.2107	0.5416	0.1849	0.4199	0.5562	0.2827
Distance Reef-Mangrove (m)	0.2454	0.3953	0.3086	0.5442	0.1229	0.0164	0.7608	0.4016	0.123	0.0503	0.4152	0.0523	0.3522	0.3709	0.3712	0.2855	0.0688	0.1821	0.1945	0.7943	0.0864	0.4469	0.4964	0.2415	<.0001	0.2348	0.8051	0.7975	0.4094	0.819	0.1719	0.1227	0.8396	0.1685	0.0028	0.0058	0.0011	0.0206	0.3756	0.0742	0.0112	0.2479	0.0145	0.0145	0.0346	0.0033	0.1009	0.554	0.2126
Temp °C reef	0.3403	0.8631	0.7466	0.8497	0.9728	0.5	0.8027	0.9986	0.9159	0.4336	0.5506	0.953	0.7662	0.3977	0.3977	0.2333	0.7421	0.1502	0.779	0.2523	0.3047	0.2672	0.7048	0.5458	0.2348	<.0001	0.999	0.9874	0.935	0.6064	0.9508	0.2177	0.2986	0.5135	0.3926	0.484	0.2795	0.0569	0.3925	0.4889	0.4632	0.7875	0.3868	0.3868	0.6606	0.1946	0.5598	0.521	0.3529
Sal psu reef	0.6544	0.4602	0.7371	0.2471	0.3404	0.454	0.9062	0.8757	0.6606	0.6272	0.5064	0.464	0.6564	0.1074	0.1074	0.4253	0.9434	0.057	0.3277	0.1428	0.6451	0.2322	0.3523	0.1978	0.8051	0.999	<.0001	<.0001	0.1552	0.5845	0.1243	0.3438	0.197	0.3234	0.5906	0.7453	0.8961	0.7939	0.4701	0.6652	0.4052	0.4247	0.3834	0.3834	0.6188	0.4895	0.9418	0.868	0.8548
TDS mg/L reef	0.6494	0.4596	0.7371	0.2464	0.3422	0.4487	0.9057	0.8758	0.6591	0.6218	0.509	0.4652	0.655	0.1055	0.1054	0.4196	0.9451	0.0551	0.325	0.1452	0.6509	0.2353	0.3527	0.195	0.7975	0.9874	<.0001	<.0001	0.1539	0.5806	0.1252	0.3373	0.1941	0.3274	0.5852	0.739	0.904	0.8038	0.465	0.6597	0.4002	0.4238	0.3784	0.3784	0.6148	0.4837	0.9467	0.8657	0.8511
ODO mg/L reef	0.8636	0.0661	0.1884	0.0025	0.4448	0.1814	0.528	0.4287	0.0792	0.2181	0.3536	0.5535	0.3754	0.1853	0.1854	0.6151	0.6707	0.4908	0.0048	0.3372	0.5468	0.4148	0.9549	0.0609	0.4094	0.935	0.1552	0.1539	<.0001	0.026	0.9195	0.084	0.104	0.9536	0.6508	0.5015	0.7388	0.8292	0.7471	0.6526	0.4221	0.2402	0.576	0.576	0.784	0.516	0.7738	0.5916	0.6795
pH reef	0.5343	0.288	0.0702	0.0694	0.8621	0.7173	0.5457	0.4402	0.1841	0.587	0.8474	0.8662	0.6439	0.2245	0.2245	0.3213	0.509	0.9697	0.0928	0.9512	0.4736	0.8175	0.5287	0.0594	0.819	0.6064	0.5845	0.5806	0.026	<.0001	0.8236	0.178	0.0328	0.5538	0.7929	0.8195	0.8099	0.9402	0.5238	0.7127	0.9267	0.6695	0.7511	0.7511	0.5911	0.9186	0.9793	0.5	0.6194
Turbidity FNU reef	0.5512	0.995	0.7782	0.6796	0.001	0.3325	0.7251	0.809	0.6182	0.602	0.8842	0.0008	0.2855	0.2386	0.2383	0.5536	0.0754	0.5312	0.6289	0.6115	0.4226	0.4078	0.5492	0.9971	0.1719	0.9508	0.1243	0.1252	0.9195	0.8236	<.0001	0.6001	0.4971	0.0134	0.3616	0.2448	0.1409	0.1434	0.5782	0.6858	0.4633	0.4187	0.4869	0.4869	0.5431	0.3801	0.2839	0.6605	0.4349
Chlorophyll µg/L reef	0.5779	0.7902	0.3759	0.0959	0.3529	0.0255	0.9506	0.6884	0.6005	0.5901	0.8448	0.4725	0.3432	0.5194	0.5195	0.1152	0.7214	0.3262	0.1911	0.6236	0.8865	0.7128	0.6368	0.0064	0.1227	0.2177	0.3438	0.3373	0.084	0.178	0.6001	<.0001	0.1541	0.3023	0.2178	0.1812	0.2289	0.1177	0.2314	0.081	0.0637	0.0655	0.0627	0.0627	0.437	0.1237	0.4274	0.6963	0.3306
BGA-PE µg/L reef	0.8675	0.8643	0.188	0.1042	0.5758	0.9327	0.4689	0.9329	0.6053	0.8521	0.5106	0.5986	0.4764	0.3079	0.3078	0.4558	0.7187	0.2951	0.2246	0.9185	0.8804	0.9783	0.7528	0.0781	0.8396	0.2986	0.197	0.1941	0.104	0.0328	0.4971	0.1541	<.0001	0.4665	0.9046	0.5795	0.6222	0.749	0.7536	0.9498	0.8624	0.8075	0.9315	0.9315	0.4396	0.4234	0.907	0.1851	0.1329
fDOM RFU reef	0.6704	0.8042	0.6697	0.991	0.0126	0.1025	0.7804	0.7512	0.9069	0.8044	0.7554	0.0282	0.1061	0.2825	0.2823	0.892	0.2079	0.9409	0.9753	0.8977	0.8312	0.8819	0.8468	0.9923	0.1685	0.5135	0.3234	0.3274	0.9536	0.5538	0.0134	0.3023	0.4665	<.0001	0.3425	0.118	0.0965	0.0231	0.7385	0.4584	0.1661	0.4613	0.1496	0.1496	0.4301	0.3612	0.5533	0.5248	0.6824
Reef Biodiversity M1	0.3028	0.6404	0.2873	0.6229	0.3405	0.0495	0.8601	0.8021	0.3526	0.0824	0.4792	0.1678	0.2607	0.4041	0.4044	0.3049	0.1161	0.1244	0.256	0.7591	0.247	0.3731	0.9753	0.2876	0.0028	0.3926	0.5906	0.5852	0.6508	0.7929	0.3616	0.2178	0.9046	0.3425	<.0001	0.0033	0.0013	0.1398	0.1505	0.0464	0.0077	0.1011	0.0066	0.0066	0.0013	0.0102	0.0132	0.3296	0.4236
Reef Biodiversity M2	0.3486	0.3313	0.3676	0.6619	0.1134	0.0036	0.3868	0.6122	0.2943	0.066	0.5172	0.0933	0.0522	0.4579	0.4582	0.3663	0.1646	0.2821	0.2766	0.7882	0.2681	0.8169	0.7757	0.4276	0.0058	0.484	0.7453	0.739	0.5015	0.8195	0.2448	0.1812	0.5795	0.118	0.0033	<.0001	0.0003	0.1128	0.2569	0.0432	0.0006	0.1286	0.0034	0.0034	0.0011	0.0913	0.0844	0.2605	0.9322
Mangrove M1	0.2932	0.522	0.259	0.8458	0.1074	0.0229	0.5756	0.581	0.3095	0.0673	0.3434	0.0685	0.1885	0.5535	0.5538	0.3521	0.1534	0.3209	0.3504	0.6895	0.1325	0.3719	0.852	0.4816	0.0011	0.2795	0.8961	0.904	0.7388	0.8099	0.1409	0.2289	0.6222	0.0965	0.0013	0.0003	<.0001	0.0501	0.2542	0.0489	0.0069	0.2185	0.0116	0.0116	0.0038	0.0436	0.0393	0.3236	0.6254
Mangrove M2	0.6204	0.936	0.3949	0.9623	0.1574	0.0729	0.6452	0.932	0.6829	0.4474	0.4763	0.1168	0.5098	0.9863	0.9866	0.4723	0.2094	0.287	0.7801	0.7747	0.384	0.5565	0.6021	0.5313	0.0206	0.0569	0.7939	0.8038	0.8292	0.9402	0.1434	0.1177	0.749	0.0231	0.1398	0.1128	0.0501	<.0001	0.8843	0.2912	0.0942	0.6768	0.0604	0.0604	0.3836	0.0274	0.5181	0.8799	0.136
Seagrass M1	0.052	0.9143	0.9154	0.8086	0.7014	0.3591	0.392	0.8486	0.7793	0.5597	0.1768	0.6258	0.9868	0.1819	0.1819	0.009	0.5277	0.4881	0.5756	0.7005	0.7	0.7243	0.6457	0.0976	0.3756	0.3925	0.4701	0.465	0.7471	0.5238	0.5782	0.2314	0.7536	0.7385	0.1505	0.2569	0.2542	0.8843	<.0001	0.0119	0.1762	0.196	0.2076	0.2076	0.1145	0.4788	0.161	0.1903	0.8643
Seagrass M2	0.0578	0.8185	0.7487	0.7778	0.4982	0.0369	0.3948	1	0.5571	0.5455	0.0619	0.5535	0.5377	0.4201	0.4202	0.0092	0.7303	0.6018	0.6338	0.8665	0.6599	0.9782	0.862	0.0663	0.0742	0.4889	0.6652	0.6597	0.6526	0.7127	0.6858	0.081	0.9498	0.4584	0.0464	0.0432	0.0489	0.2912	0.0119	<.0001	0.0115	0.0783	0.0188	0.0188	0.0476	0.1889	0.2109	0.03	0.8125
Trophic level (Fish Base)	0.2601	0.4815	0.4749	0.5946	0.2374	0.0003	0.5034	0.8807	0.4205	0.2096	0.4078	0.2084	0.0867	0.4108	0.411	0.1551	0.2254	0.1941	0.3866	0.4679	0.5722	0.792	0.6268	0.1929	0.0112	0.4632	0.4052	0.4002	0.4221	0.9267	0.4633	0.0637	0.8624	0.1661	0.0077	0.0006	0.0069	0.0942	0.1762	0.0115	<.0001	0.0789	<.0001	<.0001	0.008	0.0602	0.2102	0.1658	0.7635
Trophic level Avg all species	0.9898	0.9398	0.4593	0.078	0.2853	0.0937	0.9385	0.4587	0.7735	0.6997	0.9817	0.2917	0.1149	0.9796	0.9798	0.452	0.3676	0.7346	0.1981	0.5477	0.7774	0.7929	0.2833	0.0521	0.2479	0.7875	0.4247	0.4238	0.2402	0.6695	0.4187	0.0655	0.8075	0.4613	0.1011	0.1286	0.2185	0.6768	0.196	0.0783	0.0789	<.0001	0.0854	0.0854	0.1429	0.2784	0.0868	0.1799	0.7135
Vulnerability (Fish Base)	0.343	0.7694	0.4171	0.6772	0.3219	0.0025	0.8244	0.8471	0.641	0.3284	0.4234	0.2426	0.1191	0.5473	0.5475	0.1769	0.1987	0.1332	0.5307	0.526	0.739	0.8784	0.5656	0.2107	0.0145	0.3868	0.3834	0.3784	0.576	0.7511	0.4869	0.0627	0.9315	0.1496	0.0066	0.0034	0.0116	0.0604	0.2076	0.0188	<.0001	0.0854	<.0001	<.0001	0.0155	0.0308	0.2122	0.1853	0.5716
Vulnerability (Fish Base)/10	0.343	0.7694	0.4171	0.6772	0.3219	0.0025	0.8244	0.8471	0.641	0.3284	0.4234	0.2426	0.1191	0.5473	0.5475	0.1769	0.1987	0.1332	0.5307	0.526	0.739	0.8784	0.5656	0.2107	0.0145	0.3868	0.3834	0.3784	0.576	0.7511	0.4869	0.0627	0.9315	0.1496	0.0066	0.0034	0.0116	0.0604	0.2076	0.0188	<.0001	0.0854	<.0001	<.0001	0.0155	0.0308	0.2122	0.1853	0.5716
Resilience high (No of species, Fish Base)	0.2606	0.4378	0.2541	0.8749	0.4113	0.0587	0.377	0.7017	0.4058	0.0782	0.4556	0.2952	0.139	0.3545	0.3547	0.352	0.2687	0.2435	0.3688	0.9852	0.3191	0.6236	0.6679	0.5416	0.0346	0.6606	0.6188	0.6148	0.784	0.5911	0.5431	0.437	0.4396	0.4301	0.0013	0.0011	0.0038	0.3836	0.1145	0.0476	0.008	0.1429	0.0155	0.0155	<.0001	0.1453	0.0339	0.1861	0.8746
Resilience medium	0.4296	0.8647	0.3569	0.49	0.432	0.1022	0.5276	0.8387	0.3482	0.2013	0.6208	0.1763	0.6475	0.4744	0.4747	0.3465	0.0659	0.0542	0.2976	0.735	0.2906	0.3875	0.5739	0.1849	0.0033	0.1946	0.4895	0.4837	0.516	0.9186	0.3801	0.1237	0.4234	0.3612	0.0102	0.0913	0.0436	0.0274	0.4788	0.1889	0.0602	0.2784	0.0308	0.0308	0.1453	<.0001	0.1474	0.8177	0.0274
Resilience low	0.7437	0.9353	0.8049	0.4531	0.393	0.385	0.9051	0.9191	0.5986	0.1629	0.8535	0.2625	0.3893	0.7487	0.7489	0.6808	0.3533	0.4769	0.1859	0.2494	0.2867	0.0912	0.8422	0.4199	0.1009	0.5598	0.9418	0.9467	0.7738	0.9793	0.2839	0.4274	0.907	0.5533	0.0132	0.0844	0.0393	0.5181	0.161	0.2109	0.2102	0.0868	0.2122	0.2122	0.0339	0.1474	<.0001	0.5598	0.6037
Resilience very low	0.3381	0.7087	0.5804	0.6362	0.5914	0.305	0.4851	0.6754	0.8304	0.6703	0.0622	0.6443	0.5659	0.7389	0.7388	0.2386	0.73	0.5629	0.5376	0.5733	0.6227	0.635	0.64	0.5562	0.554	0.521	0.868	0.8657	0.5916	0.5	0.6605	0.6963	0.1851	0.5248	0.3296	0.2605	0.3236	0.8799	0.1903	0.03	0.1658	0.1799	0.1853	0.1853	0.1861	0.8177	0.5598	<.0001	0.6382
Resilience high %	0.9377	0.6007	0.8106	0.4741	0.6935	0.7362	0.0953	0.9496	0.63	0.8477	0.8785	0.371	0.5353	0.9779	0.9777	0.7377	0.1943	0.3753	0.589	0.4771	0.585	0.3417	0.2247	0.2827	0.2126	0.3529	0.8548	0.8511	0.6795	0.6194	0.4349	0.3306	0.1329	0.6824	0.4236	0.9322	0.6254	0.136	0.8643	0.8125	0.7635	0.7135	0.5716	0.5716	0.8746	0.0274	0.6037	0.6382	<.0001
Resilience medium %	0.7819	0.5752	0.9412	0.8128	0.8413	0.7657	0.1021	0.9692	0.9375	0.6298	0.841	0.8942	0.2669	0.8425	0.8424	0.9163	0.5592	0.5766	0.8754	0.8777	0.9745	0.8895	0.2275	0.7183	0.8481	0.5114	0.8202	0.819	0.842	0.6622	0.9407	0.7193	0.1102	0.9922	0.6711	0.3691	0.5484	0.3443	0.2821	0.4884	0.6015	0.4962	0.8031	0.8031	0.1871	0.3383	0.3805	0.2584	0.0128
Resilience low %	0.6762	0.8414	0.8821	0.3387	0.3343	0.3539	0.9204	0.9484	0.44	0.1456	0.8152	0.2126	0.4618	0.6863	0.6866	0.6114	0.3046	0.514	0.1247	0.25	0.2261	0.0957	0.9683	0.2969	0.0743	0.5771	0.9575	0.9623	0.6195	0.813	0.2451	0.3552	0.9369	0.5832	0.0139	0.0948	0.0421	0.4916	0.165	0.188	0.2146	0.0726	0.2262	0.2262	0.0496	0.1132	<.0001	0.5762	0.4622
Resilience very low %	0.3381	0.7087	0.5804	0.6362	0.5914	0.305	0.4851	0.6754	0.8304	0.6703	0.0622	0.6443	0.5659	0.7389	0.7388	0.2386	0.73	0.5629	0.5376	0.5733	0.6227	0.635	0.64	0.5562	0.554	0.521	0.868	0.8657	0.5916	0.5	0.6605	0.6963	0.1851	0.5248	0.3296	0.2605	0.3236	0.8799	0.1903	0.03	0.1658	0.1799	0.1853	0.1853	0.1861	0.8177	0.5598	<.0001	0.6382
Substrate complexity high (number of species, RLS Team)	0.4361	0.3149	0.8908	0.9216	0.6881	0.9201	0.7864	0.2956	0.5834	0.9753	0.2516	0.809	0.8276	0.9282	0.9281	0.262	0.8472	0.7954	1	0.1611	0.9469	0.1538	0.1755	0.4027	0.6117	0.7385	0.9675	0.9649	0.5222	0.7692	0.9537	0.6786	0.8315	0.8229	0.1684	0.4908	0.3738	0.9295	0.019	0.1215	0.4662	0.1493	0.3938	0.3938	0.1633	0.4982	0.0443	0.1627	0.8338
Substrate complexity medium	0.2516	0.4161	0.1586	0.7785	0.0938	0.0204	0.6532	0.3652	0.1451	0.0895	0.2946	0.03	0.3099	0.5318	0.5321	0.3731	0.0315	0.3285	0.361	0.9499	0.1297	0.5566	0.4818	0.4081	0.0001	0.4933	0.9508	0.9457	0.6218	0.8539	0.1311	0.2733	0.7398	0.1427	0.0041	0.0043	0.0012	0.0436	0.4722	0.0703	0.0101	0.2679	0.0146	0.0146	0.0221	0.0139	0.1424	0.3079	0.3287
Substrate complexity low	0.4812	0.8077	0.5084	0.5118	0.7351	0.1741	0.9152	0.8614	0.6017	0.1138	0.849	0.4696	0.3069	0.3455	0.3457	0.3983	0.303	0.0546	0.2143	0.6586	0.4135	0.3164	0.6023	0.3042	0.0474	0.3615	0.3611	0.3566	0.6496	0.8157	0.7193	0.2639	0.858	0.6675	0.0008	0.0334	0.0284	0.3452	0.1056	0.1327	0.0481	0.1021	0.0351	0.0351	0.0068	0.0347	0.0057	0.5824	0.5289
Substrate complexity high %	0.568	0.3907	0.5112	0.9278	0.2457	0.8387	0.8789	0.1787	0.2922	0.6216	0.595	0.1655	0.8878	0.7535	0.7533	0.2448	0.1417	0.905	0.8265	0.7001	0.4361	0.8492	0.1485	0.4796	0.6418	0.8049	0.6183	0.6163	0.6884	0.9644	0.2749	0.7116	0.9827	0.4435	0.7171	0.948	0.9902	0.4235	0.0213	0.2931	0.8113	0.3667	0.7732	0.7732	0.5253	0.7273	0.3726	0.3393	0.4226
Substrate complexity medium %	0.4612	0.8711	0.9749	0.5775	0.4058	0.578	0.8851	0.4441	0.8892	0.4696	0.9558	0.5516	0.7211	0.2408	0.2408	0.2418	0.845	0.075	0.4193	0.7416	0.9673	0.5717	0.2659	0.2437	0.4824	0.4012	0.1358	0.1335	0.7394	0.9442	0.4039	0.3475	0.5226	0.5828	0.1073	0.3528	0.3875	0.9608	0.0266	0.2323	0.2754	0.1977	0.221	0.221	0.124	0.2906	0.0867	0.7165	0.8769
Substrate complexity low %	0.4861	0.9057	0.8335	0.4593	0.5522	0.4317	0.8103	0.6482	0.8306	0.2561	0.8936	0.8098	0.6141	0.1716	0.1716	0.3189	0.7846	0.0158	0.2595	0.7924	0.7292	0.5253	0.4052	0.2401	0.2738	0.3367	0.0887	0.0867	0.5643	0.944	0.534	0.3004	0.4242	0.6953	0.0507	0.246	0.2723	0.7156	0.078	0.2857	0.1957	0.2143	0.1474	0.1474	0.091	0.1223	0.0748	0.9229	0.6168
Total Biomass (g)	0.6195	0.6931	0.2132	0.5509	0.4748	0.0672	0.8777	0.5441	0.673	0.738	0.4056	0.4194	0.2106	0.9287	0.9286	0.438	0.4054	0.2263	0.6701	0.6895	0.965	0.9598	0.4947	0.8658	0.1285	0.2203	0.8543	0.8469	0.675	0.2555	0.5145	0.2809	0.5656	0.0504	0.1165	0.0568	0.0651	0.0263	0.5827	0.1775	0.027	0.545	0.0097	0.0097	0.1306	0.1574	0.5821	0.3384	0.7741
Total Biomass tonnes / hectare	0.4695	0.5112	0.9175	0.8668	0.8687	0.6498	0.8131	0.4443	0.6637	0.335	0.1678	0.8907	0.9563	0.7684	0.7684	0.2612	0.9258	0.5878	0.5122	0.4347	0.2763	0.4363	0.5736	0.3843	0.9805	0.2893	0.7004	0.7056	0.6989	0.6824	0.8344	0.7804	0.5119	0.8753	0.6215	0.7384	0.8696	0.6578	0.2297	0.1094	0.436	0.1841	0.4169	0.4169	0.5087	0.954	0.8276	0.0026	0.8337
Biomass <10cm %	0.265	0.8891	0.0333	0.3783	0.8657	0.2834	0.9142	0.9233	0.8929	0.2651	0.2978	0.5774	0.7169	0.53	0.5302	0.3953	0.3928	0.0673	0.91	0.4948	0.3257	0.2615	0.8612	0.9919	0.0587	0.0817	0.9045	0.8962	0.5084	0.2954	0.7213	0.6361	0.7116	0.3506	0.0336	0.0831	0.0336	0.0597	0.3935	0.2611	0.1009	0.9272	0.058	0.058	0.0643	0.0537	0.2517	0.6674	0.5075
≤10	0.269	0.4631	0.47	0.5077	0.2749	0.0011	0.5466	0.8638	0.3672	0.2173	0.4406	0.2055	0.1015	0.3919	0.3921	0.1703	0.1621	0.1898	0.3406	0.4113	0.6134	0.7542	0.6548	0.1574	0.0129	0.6383	0.31	0.3068	0.3809	0.9249	0.5061	0.0814	0.8943	0.253	0.0056	0.0017	0.013	0.1516	0.1796	0.0126	<.0001	0.0516	<.0001	<.0001	0.0074	0.0491	0.1954	0.1408	0.6891
≤12.5-≥20	0.3179	0.8955	0.1005	0.5789	0.6539	0.0757	0.9757	0.821	0.9955	0.3965	0.312	0.4743	0.3578	0.629	0.6292	0.2818	0.3418	0.075	0.9254	0.97	0.6405	0.7035	0.7435	0.7228	0.0457	0.1392	0.6644	0.6568	0.7422	0.3267	0.6645	0.3102	0.7143	0.1742	0.0266	0.03	0.024	0.0321	0.3455	0.1165	0.0157	0.5504	0.0047	0.0047	0.0435	0.0503	0.337	0.3908	0.5978
≥25	0.8413	0.9958	0.2987	0.7805	0.7671	0.9522	0.9072	0.9026	0.9753	0.194	0.8667	0.9186	0.5918	0.5819	0.582	0.8975	0.6607	0.1927	0.6232	0.2831	0.4338	0.1099	0.6051	0.6949	0.4495	0.5629	0.8168	0.8136	0.5959	0.3106	0.9839	0.7499	0.5796	0.9202	0.1008	0.2826	0.2198	0.9215	0.3767	0.7678	0.529	0.6965	0.4755	0.4755	0.0709	0.4184	0.0365	0.9883	0.8812
Total Biomass Reef	0.62	0.6198	0.2744	0.7701	0.4415	0.0698	0.7804	0.4401	0.7109	0.5863	0.4235	0.3429	0.1756	0.9534	0.9533	0.3994	0.3347	0.2034	0.9432	0.988	0.9216	0.6815	0.42	0.6595	0.0726	0.2414	0.8475	0.8401	0.7185	0.2865	0.4138	0.2297	0.5841	0.0746	0.023	0.0225	0.0196	0.0485	0.3117	0.0907	0.0141	0.246	0.0034	0.0034	0.0359	0.0851	0.1745	0.246	0.6872
Total Biomass Mangrove	0.9767	0.9646	0.4334	0.8776	0.3783	0.1626	0.6501	0.8317	0.9277	0.4238	0.9548	0.3478	0.2758	0.968	0.9682	0.8798	0.4392	0.1393	0.8847	0.9546	0.6072	0.7129	0.7931	0.9646	0.1472	0.0469	0.9925	0.9821	0.9513	0.6106	0.3977	0.2698	0.8958	0.0473	0.2808	0.1662	0.1373	0.0066	0.8876	0.7027	0.1793	0.9741	0.1225	0.1225	0.4245	0.1575	0.677	0.6797	0.5131
Total Biomass Seagrass	0.1748	0.1093	0.4147	0.6016	0.249	0.1408	0.1523	0.1441	0.0447	0.0125	0.4654	0.1847	0.3689	0.2031	0.2033	0.4244	0.2678	0.5758	0.1148	0.7191	0.041	0.443	0.6012	0.4725	0.0355	0.8551	0.9194	0.9163	0.4467	0.7844	0.3837	0.595	0.6109	0.6909	0.0212	0.0184	0.0171	0.6001	0.1955	0.1143	0.0888	0.2596	0.1815	0.1815	0.0082	0.2414	0.044	0.3747	0.9739
Abudefduf saxatilis	0.789	0.5717	0.9294	0.482	0.2079	0.0201	0.9986	0.887	0.5579	0.5212	0.9655	0.2591	0.2395	0.7108	0.711	0.4841	0.3695	0.2636	0.5298	0.3331	0.7646	0.4714	0.9419	0.3373	0.1163	0.2119	0.5486	0.5414	0.2431	0.6454	0.4369	0.0371	0.4623	0.0765	0.4136	0.1818	0.2491	0.0139	0.932	0.4106	0.086	0.5799	0.0795	0.0795	0.6249	0.1552	0.8905	0.9447	0.3904
Acanthurus bahianus	0.9708	0.8951	0.4143	0.9692	0.8407	0.7943	0.81	0.9781	0.8869	0.1034	0.6716	0.6119	0.4706	0.6556	0.6557	0.756	0.5772	0.1812	0.4287	0.184	0.2417	0.0559	0.7599	0.6998	0.2995	0.2744	0.9368	0.9433	0.8066	0.4986	0.642	0.9992	0.7782	0.683	0.1101	0.2267	0.141	0.5319	0.5829	0.9061	0.5229	0.7827	0.4798	0.4798	0.1189	0.3212	0.0326	0.6173	0.9123
Acanthurus chirurgus	0.9013	0.7021	0.5712	0.6324	0.5966	0.3065	0.5776	0.6681	0.6167	0.8764	0.8928	0.6449	0.5621	0.7409	0.7408	0.8529	0.7052	0.3869	0.5397	0.586	0.8177	0.6523	0.8471	0.8817	0.4994	0.1527	0.9914	0.9838	0.886	0.6281	0.659	0.3654	0.8395	0.0877	0.875	0.583	0.5854	0.0286	0.5426	0.9124	0.4123	0.6761	0.3016	0.3016	0.9355	0.4343	0.4771	0.7627	0.556
Acanthurus coeruleus	0.4291	0.4361	0.0845	0.6012	0.3155	0.3412	0.7188	0.203	0.2802	0.0462	0.5941	0.2032	0.6997	0.5018	0.502	0.8737	0.2844	0.2729	0.6145	0.3193	0.019	0.1603	0.2745	0.6984	0.045	0.0981	0.5486	0.5563	0.912	0.7187	0.2747	0.829	0.7493	0.2287	0.1508	0.1207	0.0415	0.0494	0.9889	0.6932	0.3057	0.6462	0.3243	0.3243	0.2174	0.1467	0.3676	0.6912	0.5383
Anisotremus virginicus	0.7109	0.8719	0.049	0.002	0.606	0.6206	0.4782	0.7528	0.5244	0.86	0.423	0.6406	0.8877	0.8027	0.8028	0.6997	0.7702	0.8275	0.066	0.9777	0.9885	0.9902	0.993	0.0224	0.6464	0.8838	0.4431	0.4414	0.0386	0.036	0.6958	0.0776	0.0272	0.9223	0.7757	0.9674	0.9634	0.8545	0.6979	0.7289	0.8647	0.1263	0.8653	0.8653	0.7665	0.4287	0.4941	0.6533	0.1786
Apogon townsendi	0.0415	0.5453	0.895	0.8603	0.5622	0.4827	0.4297	0.4966	0.3916	0.9602	0.22	0.475	0.3455	0.1125	0.1125	0.0182	0.5472	0.568	0.8759	0.5692	0.7845	0.3946	0.4462	0.1187	0.6488	0.4265	0.2962	0.2935	0.3872	0.1453	0.309	0.272	0.1798	0.55	0.9882	0.9893	0.9456	0.6634	0.3341	0.277	0.5801	0.9003	0.6325	0.6325	0.8444	0.6134	0.3953	0.7855	0.5825
Aulostomus maculatus	0.8599	0.7087	0.5804	0.6362	0.0117	0.3693	0.5866	0.6754	0.5952	0.6081	0.7819	0.0956	0.3791	0.5228	0.5226	0.962	0.7701	0.2815	0.5376	0.5733	0.3715	0.6112	0.7188	0.8301	0.4155	0.6692	0.0903	0.0923	0.6555	0.514	0.0216	0.4303	0.6672	0.059	0.7513	0.3574	0.2673	0.3287	1	0.5733	0.6231	0.567	0.7872	0.7872	0.7494	0.9771	0.4619	0.7681	0.9183
Bodianus rufus	0.7823	0.7087	0.5804	0.9267	0.8833	0.9805	0.5866	0.6754	0.7772	0.2915	0.7168	0.6798	0.5659	0.9956	0.9956	0.6958	0.709	0.3775	0.6008	0.1052	0.4316	0.0303	0.64	0.6928	0.4654	0.3654	0.7144	0.7196	0.5904	0.4406	0.5754	0.9388	0.7027	0.6854	0.1648	0.3574	0.2163	0.6701	0.5371	0.9115	0.6943	0.6683	0.6126	0.6126	0.1861	0.4428	0.0186	0.7681	0.9183
Canthigaster rostrata	0.5379	0.419	0.9364	0.4202	0.0011	0.2483	0.9156	0.4282	0.3135	0.2996	0.6658	0.0068	0.2005	0.605	0.6046	0.4914	0.1715	0.7556	0.2992	0.879	0.248	0.6939	0.5415	0.9982	0.2055	0.7242	0.2872	0.2901	0.3991	0.7025	0.0052	0.4667	0.8603	0.0289	0.5925	0.275	0.227	0.1424	0.3886	0.9944	0.526	0.6884	0.6326	0.6326	0.7428	0.5205	0.5704	0.7175	0.6123
Carangoides ruber	0.8882	0.6469	0.5164	0.6063	0.6636	0.3254	0.5129	0.6027	0.5619	0.9313	0.9308	0.6778	0.5465	0.7658	0.7657	0.8691	0.6973	0.2962	0.5499	0.6715	0.8337	0.7677	0.7783	0.8496	0.4746	0.119	0.9518	0.9438	0.8234	0.548	0.6932	0.38	0.8445	0.096	0.7798	0.5452	0.5348	0.0267	0.5973	0.9157	0.3938	0.6922	0.2718	0.2718	0.9736	0.3818	0.5851	0.7293	0.5435
Cephalopholis cruentata	0.4732	0.9742	0.2411	0.5471	0.0979	0.8982	0.8594	0.7999	0.7844	0.7865	0.9517	0.2791	0.8827	0.245	0.2449	0.5627	0.9896	0.0236	0.7301	0.5711	0.7525	0.7447	0.5735	0.9652	0.8663	0.6124	0.0567	0.0564	0.7577	0.3913	0.0836	0.9137	0.7777	0.4028	0.5506	0.8252	0.967	0.9471	0.6232	0.8801	0.5646	0.7454	0.4273	0.4273	0.5256	0.4746	0.8351	0.9149	0.9194
Chaetodipterus faber	0.3381	0.7087	0.5804	0.6362	0.5914	0.305	0.4851	0.6754	0.8304	0.6703	0.0622	0.6443	0.5659	0.7389	0.7388	0.2386	0.73	0.5629	0.5376	0.5733	0.6227	0.635	0.64	0.5562	0.554	0.521	0.868	0.8657	0.5916	0.5	0.6605	0.6963	0.1851	0.5248	0.3296	0.2605	0.3236	0.8799	0.1903	0.03	0.1658	0.1799	0.1853	0.1853	0.1861	0.8177	0.5598	<.0001	0.6382
Chaetodon capistratus	0.132	0.168	0.9972	0.6213	0.7471	0.3927	0.1064	0.4696	0.3041	0.0661	0.7977	0.6743	0.6111	0.0178	0.0178	0.1922	0.6072	0.2484	0.1645	0.8458	0.2624	0.7687	0.6488	0.3903	0.4099	0.4572	0.3009	0.2969	0.3711	0.4712	0.4528	0.5085	0.8108	0.541	0.2037	0.1933	0.2717	0.8542	0.0299	0.226	0.2655	0.4906	0.3974	0.3974	0.0796	0.6935	0.1976	0.8258	0.4315
Chaetodon ocellatus	0.8682	0.4071	0.8449	0.4655	0.0528	0.3102	0.7408	0.3495	0.2592	0.9518	0.9068	0.0908	0.6069	0.6641	0.6638	0.8657	0.2322	0.4193	0.6769	0.3171	0.7631	0.3477	0.3302	0.6585	0.5137	0.5609	0.6699	0.6678	0.3128	0.4983	0.1473	0.5388	0.9586	0.2478	0.843	0.7501	0.8256	0.4211	0.293	0.8852	0.6885	0.7892	0.8126	0.8126	0.6886	0.7842	0.4734	0.8	0.54
Chaetodon striatus	0.6463	0.1977	0.3596	0.9431	0.6143	0.661	0.4136	0.2206	0.2354	0.0054	0.7908	0.477	0.4743	0.2779	0.2781	0.8152	0.5418	0.3401	0.1978	0.3075	0.0307	0.1402	0.7734	0.6774	0.2387	0.5058	0.896	0.9008	0.81	0.8473	0.6294	0.8145	0.6326	0.8765	0.1544	0.1629	0.1227	0.7529	0.6341	0.8825	0.517	0.9681	0.6376	0.6376	0.0919	0.5036	0.085	0.6311	0.7565
Chromis multilineata	0.3293	0.0001	0.5804	0.7754	0.5914	0.4233	0.0149	0.0036	0.0153	0.0314	0.9387	0.6443	0.5659	0.0752	0.0752	0.9022	0.709	0.7035	0.2146	0.5733	0.0843	0.6834	0.4785	0.9056	0.4732	0.8679	0.6697	0.6694	0.2505	0.5527	0.9418	0.8561	0.7783	0.8082	0.7127	0.3574	0.5211	0.9039	1	0.9115	0.5651	0.7266	0.862	0.862	0.4202	0.9771	0.9428	0.7681	0.4212
Coryphopterus glaucofraenum	0.5583	0.1593	0.3772	0.9358	0.3372	0.088	0.3638	0.2643	0.3132	0.1683	0.9531	0.3896	0.2738	0.378	0.3781	0.7653	0.4883	0.261	0.6329	0.4391	0.3152	0.6009	0.8169	0.9252	0.1861	0.2746	0.7399	0.7331	0.4742	0.9997	0.6622	0.4544	0.9589	0.2059	0.5151	0.1583	0.2348	0.0935	0.7466	0.7355	0.1778	0.7174	0.2312	0.2312	0.4572	0.4282	0.7391	0.7147	0.9698
Coryphopterus personatus	0.3094	0.8671	0.7918	0.7758	0.3307	0.0721	0.3892	0.8492	0.7376	0.848	0.1633	0.3794	0.2625	0.9189	0.9191	0.1676	0.4964	0.8847	0.8225	0.4567	0.8956	0.6042	0.5744	0.2248	0.2392	0.6656	0.7988	0.799	0.7946	0.8691	0.5066	0.2886	0.4124	0.4088	0.1217	0.0718	0.1322	0.6644	0.1108	0.0049	0.0339	0.0319	0.0541	0.0541	0.0633	0.4865	0.2976	0.0008	0.799
Diodon hystrix	0.7823	0.7087	0.5804	0.9267	0.8833	0.9805	0.5866	0.6754	0.7772	0.2915	0.7168	0.6798	0.5659	0.9956	0.9956	0.6958	0.709	0.3775	0.6008	0.1052	0.4316	0.0303	0.64	0.6928	0.4654	0.3654	0.7144	0.7196	0.5904	0.4406	0.5754	0.9388	0.7027	0.6854	0.1648	0.3574	0.2163	0.6701	0.5371	0.9115	0.6943	0.6683	0.6126	0.6126	0.1861	0.4428	0.0186	0.7681	0.9183
Echeneis neucratoides	0.7823	0.7087	0.5804	0.9267	0.8833	0.9805	0.5866	0.6754	0.7772	0.2915	0.7168	0.6798	0.5659	0.9956	0.9956	0.6958	0.709	0.3775	0.6008	0.1052	0.4316	0.0303	0.64	0.6928	0.4654	0.3654	0.7144	0.7196	0.5904	0.4406	0.5754	0.9388	0.7027	0.6854	0.1648	0.3574	0.2163	0.6701	0.5371	0.9115	0.6943	0.6683	0.6126	0.6126	0.1861	0.4428	0.0186	0.7681	0.9183
Elacatinus xanthiprora	0.6238	0.574	0.4008	0.4745	0.4152	0.1002	0.9834	0.5278	0.5759	0.6772	0.2201	0.4854	0.3823	0.6167	0.6166	0.3664	0.5871	0.7394	0.3466	0.3917	0.6037	0.4729	0.6481	0.8019	0.332	0.4745	0.9209	0.9257	0.6486	0.3986	0.5059	0.2962	0.5356	0.0462	0.4633	0.2263	0.2662	0.0597	0.7953	0.1827	0.0921	0.6599	0.0595	0.0595	0.4745	0.4192	0.8061	0.1738	0.8464
Equetus punctatus	0.7823	0.7087	0.5804	0.9267	0.8833	0.9805	0.5866	0.6754	0.7772	0.2915	0.7168	0.6798	0.5659	0.9956	0.9956	0.6958	0.709	0.3775	0.6008	0.1052	0.4316	0.0303	0.64	0.6928	0.4654	0.3654	0.7144	0.7196	0.5904	0.4406	0.5754	0.9388	0.7027	0.6854	0.1648	0.3574	0.2163	0.6701	0.5371	0.9115	0.6943	0.6683	0.6126	0.6126	0.1861	0.4428	0.0186	0.7681	0.9183
Ginglymostoma cirratum	0.6664	0.7385	0.0469	0.0002	0.5914	0.417	0.5866	0.6754	0.5485	0.8341	0.3255	0.6443	0.5659	0.7358	0.7359	0.692	0.709	0.6852	0.0544	0.5733	0.8127	0.635	0.666	0.0172	0.6393	0.9807	0.2319	0.231	0.0148	0.0621	0.8017	0.0471	0.0437	0.9834	0.7127	0.8592	1	0.8799	0.6837	0.654	0.6411	0.0659	0.6523	0.6523	0.922	0.4428	0.5598	0.7681	0.3007
Gymnothorax funebris	0.3381	0.7087	0.5804	0.6362	0.5914	0.305	0.4851	0.6754	0.8304	0.6703	0.0622	0.6443	0.5659	0.7389	0.7388	0.2386	0.73	0.5629	0.5376	0.5733	0.6227	0.635	0.64	0.5562	0.554	0.521	0.868	0.8657	0.5916	0.5	0.6605	0.6963	0.1851	0.5248	0.3296	0.2605	0.3236	0.8799	0.1903	0.03	0.1658	0.1799	0.1853	0.1853	0.1861	0.8177	0.5598	<.0001	0.6382
Haemulon carbonarium	0.7183	0.4118	0.4212	0.7694	0.4352	0.1548	0.6431	0.5008	0.6103	0.4516	0.9261	0.5038	0.403	0.6334	0.6335	0.8109	0.5903	0.3216	0.984	0.4122	0.5818	0.5138	0.858	0.8485	0.3151	0.2341	0.8251	0.8182	0.6702	0.8917	0.7094	0.459	0.9606	0.1652	0.753	0.3264	0.4064	0.0645	0.5672	0.8735	0.283	0.5681	0.2963	0.2963	0.7609	0.4871	0.4716	0.6713	0.8869
Haemulon flavolineatum	0.3467	0.8888	0.4654	0.8794	0.5446	0.6218	0.767	0.7874	0.5596	0.9078	0.5342	0.8891	0.5484	0.4248	0.4248	0.3433	0.4152	0.3031	0.9551	0.3343	0.8303	0.4389	0.5331	0.3332	0.5621	0.8776	0.1233	0.1246	0.6916	0.9283	0.4722	0.672	0.4093	0.55	0.6673	0.9994	0.9248	0.725	0.8847	0.5744	0.5479	0.8705	0.4516	0.4516	0.9582	0.2392	0.5462	0.6766	0.1971
Haemulon macrostomum	0.9042	0.7087	0.5804	0.6362	0.5914	0.305	0.5866	0.6754	0.6229	0.8667	0.8875	0.6443	0.5659	0.7389	0.7388	0.8488	0.709	0.3997	0.5376	0.5733	0.8127	0.635	0.8547	0.8877	0.5049	0.1582	0.9935	0.9861	0.8947	0.6401	0.6585	0.3635	0.8371	0.088	0.8895	0.5902	0.595	0.0294	0.5371	0.9115	0.4157	0.6743	0.3063	0.3063	0.922	0.4428	0.4619	0.7681	0.5586
Haemulon plumierii	0.335	0.7171	0.5279	0.6551	0.5407	0.2667	0.5028	0.6707	0.853	0.8017	0.0679	0.5714	0.4921	0.7684	0.7683	0.2425	0.6648	0.6561	0.6164	0.6783	0.7226	0.7817	0.6136	0.5562	0.451	0.609	0.8504	0.8488	0.5862	0.4622	0.588	0.6612	0.1721	0.4662	0.2261	0.1828	0.2238	0.8004	0.1532	0.0216	0.1246	0.1459	0.1394	0.1394	0.1153	0.7113	0.4004	<.0001	0.6623
Haemulon sciurus	0.8079	0.6848	0.5631	0.9206	0.8557	0.9747	0.5685	0.6895	0.7978	0.2965	0.7712	0.6439	0.605	0.9742	0.9741	0.7156	0.6782	0.4025	0.6056	0.0862	0.4071	0.0217	0.7033	0.715	0.4388	0.3658	0.6693	0.6744	0.5725	0.4487	0.5329	0.94	0.7017	0.6749	0.1537	0.3571	0.2035	0.6493	0.5264	0.8817	0.6959	0.6559	0.6122	0.6122	0.1854	0.4151	0.0148	0.801	0.8607
Halichoeres bivittatus	0.9761	0.7797	0.5112	0.5956	0.6346	0.2578	0.7042	0.6909	0.6379	0.9266	0.8664	0.6923	0.478	0.9051	0.905	0.762	0.7788	0.2782	0.6178	0.6817	0.9472	0.7714	0.7386	0.873	0.4217	0.0888	0.9487	0.9398	0.8741	0.5963	0.7144	0.3443	0.8998	0.09	0.7072	0.4307	0.4354	0.0257	0.736	0.8018	0.3168	0.7152	0.2293	0.2293	0.834	0.4032	0.6536	0.7764	0.6834
Holacanthus ciliaris	0.5433	0.9679	0.6424	0.8685	0.527	0.8682	0.6212	0.294	0.2442	0.5242	0.4602	0.3332	0.2192	0.8805	0.8807	0.7944	0.4071	0.9385	0.5881	0.0729	0.0819	0.0668	0.0045	0.6404	0.2763	0.4595	0.3419	0.3441	0.9429	0.4466	0.2721	0.8985	0.4802	0.8891	0.6067	0.9784	0.5628	0.3658	0.9378	0.8863	0.8187	0.7928	0.8381	0.8381	0.8738	0.2308	0.506	0.681	0.0384
Holocentrus rufus	0.3381	0.7087	0.5804	0.6362	0.5914	0.305	0.4851	0.6754	0.8304	0.6703	0.0622	0.6443	0.5659	0.7389	0.7388	0.2386	0.73	0.5629	0.5376	0.5733	0.6227	0.635	0.64	0.5562	0.554	0.521	0.868	0.8657	0.5916	0.5	0.6605	0.6963	0.1851	0.5248	0.3296	0.2605	0.3236	0.8799	0.1903	0.03	0.1658	0.1799	0.1853	0.1853	0.1861	0.8177	0.5598	<.0001	0.6382
Hypoplectrus nigricans	0.1514	0.258	0.4168	0.8918	0.3521	0.0779	0.047	0.3925	0.3169	0.4807	0.1609	0.4216	0.2898	0.5195	0.5196	0.2581	0.51	0.8955	0.8408	0.269	0.6868	0.3802	0.9396	0.5913	0.2727	0.5588	0.8024	0.8037	0.7414	0.8288	0.6944	0.6601	0.2222	0.552	0.2532	0.0717	0.1707	0.7893	0.3075	0.0502	0.0587	0.3231	0.1335	0.1335	0.0771	0.751	0.7178	0.0196	0.423
Hypoplectrus puella	0.2367	0.6017	0.1745	0.4357	0.4173	0.0378	0.2728	0.7458	0.7932	0.4763	0.2108	0.4897	0.2209	0.6308	0.6309	0.2851	0.6078	0.4536	0.7581	0.4464	0.6955	0.6043	0.7348	0.9548	0.1573	0.4092	0.9036	0.8975	0.8722	0.4482	0.6734	0.4429	0.3247	0.1269	0.2095	0.0347	0.0695	0.1199	0.4929	0.1182	0.0228	0.7673	0.0318	0.0318	0.0967	0.4362	0.8748	0.2147	0.6357
Hypoplectrus unicolor	0.3381	0.7087	0.5804	0.6362	0.5914	0.305	0.4851	0.6754	0.8304	0.6703	0.0622	0.6443	0.5659	0.7389	0.7388	0.2386	0.73	0.5629	0.5376	0.5733	0.6227	0.635	0.64	0.5562	0.554	0.521	0.868	0.8657	0.5916	0.5	0.6605	0.6963	0.1851	0.5248	0.3296	0.2605	0.3236	0.8799	0.1903	0.03	0.1658	0.1799	0.1853	0.1853	0.1861	0.8177	0.5598	<.0001	0.6382
Lucayablennius zingaro	0.3293	0.0001	0.5804	0.7754	0.5914	0.4233	0.0149	0.0036	0.0153	0.0314	0.9387	0.6443	0.5659	0.0752	0.0752	0.9022	0.709	0.7035	0.2146	0.5733	0.0843	0.6834	0.4785	0.9056	0.4732	0.8679	0.6697	0.6694	0.2505	0.5527	0.9418	0.8561	0.7783	0.8082	0.7127	0.3574	0.5211	0.9039	1	0.9115	0.5651	0.7266	0.862	0.862	0.4202	0.9771	0.9428	0.7681	0.4212
Lutjanus apodus	0.6664	0.7385	0.0469	0.0002	0.5914	0.417	0.5866	0.6754	0.5485	0.8341	0.3255	0.6443	0.5659	0.7358	0.7359	0.692	0.709	0.6852	0.0544	0.5733	0.8127	0.635	0.666	0.0172	0.6393	0.9807	0.2319	0.231	0.0148	0.0621	0.8017	0.0471	0.0437	0.9834	0.7127	0.8592	1	0.8799	0.6837	0.654	0.6411	0.0659	0.6523	0.6523	0.922	0.4428	0.5598	0.7681	0.3007
Lutjanus griseus	0.7325	0.7869	0.0648	0.001	0.5705	0.5024	0.5182	0.7843	0.4738	0.849	0.421	0.5899	0.7828	0.7652	0.7653	0.6769	0.6584	0.7641	0.063	0.7584	0.9519	0.8038	0.9535	0.0164	0.5959	0.9726	0.336	0.3349	0.0237	0.0445	0.7118	0.0625	0.0307	0.9574	0.7378	0.9567	0.9853	0.8209	0.7353	0.6808	0.7464	0.1027	0.75	0.75	0.8167	0.3861	0.5659	0.727	0.1778
Lutjanus jocu	0.8613	0.9012	0.535	0.9511	0.8363	0.9512	0.7395	0.8494	0.9404	0.1934	0.7082	0.6399	0.5193	0.8684	0.8685	0.7038	0.676	0.3489	0.5082	0.1214	0.3275	0.0351	0.6943	0.6807	0.4122	0.3723	0.7479	0.7533	0.675	0.4789	0.5781	0.9225	0.6772	0.7032	0.1455	0.2984	0.1819	0.6776	0.5339	0.9011	0.6453	0.6946	0.596	0.596	0.1478	0.4411	0.0179	0.7413	0.9863
Lutjanus synagris	0.6664	0.7385	0.0469	0.0002	0.5914	0.417	0.5866	0.6754	0.5485	0.8341	0.3255	0.6443	0.5659	0.7358	0.7359	0.692	0.709	0.6852	0.0544	0.5733	0.8127	0.635	0.666	0.0172	0.6393	0.9807	0.2319	0.231	0.0148	0.0621	0.8017	0.0471	0.0437	0.9834	0.7127	0.8592	1	0.8799	0.6837	0.654	0.6411	0.0659	0.6523	0.6523	0.922	0.4428	0.5598	0.7681	0.3007
Malacoctenus triangulatus	0.798	0.5868	0.4172	0.6286	0.567	0.3571	0.4251	0.5417	0.5451	0.7075	0.9526	0.5173	0.3989	0.7573	0.7572	0.9769	0.5872	0.1973	0.7745	0.8037	0.8535	0.6128	0.6785	0.7358	0.3069	0.0532	0.8541	0.8638	0.6866	0.3971	0.4786	0.4318	0.9916	0.065	0.4111	0.3185	0.2476	0.0194	0.8107	0.8724	0.3313	0.8728	0.2139	0.2139	0.5752	0.2524	0.7475	0.6688	0.5534
Microspathodon chrysurus	0.9272	0.5552	0.7275	0.5055	0.0046	0.1315	0.5209	0.6408	0.441	0.3618	0.7204	0.0497	0.2077	0.7734	0.7731	0.7934	0.5557	0.5977	0.3512	0.6974	0.2815	0.6354	0.8228	0.589	0.1672	0.5089	0.2393	0.2436	0.4793	0.5215	0.0191	0.2205	0.7389	0.0301	0.3829	0.122	0.0886	0.1715	0.7505	0.316	0.2713	0.3439	0.3909	0.3909	0.3988	0.6097	0.2803	0.6418	0.9671
Ocyurus chrysurus	0.4384	0.5995	0.4336	0.6223	0.5626	0.3365	0.6771	0.5555	0.741	0.9663	0.1296	0.5295	0.4156	0.7489	0.7488	0.3587	0.619	0.8684	0.726	0.9118	0.9005	0.7334	0.5094	0.7033	0.366	0.8303	0.7482	0.7484	0.4471	0.3135	0.5005	0.7359	0.1413	0.4259	0.1015	0.1171	0.115	0.7392	0.1108	0.0352	0.1238	0.1299	0.1226	0.1226	0.0411	0.5766	0.1276	0.0025	0.6882
Odontoscion dentex	0.6664	0.7385	0.0469	0.0002	0.5914	0.417	0.5866	0.6754	0.5485	0.8341	0.3255	0.6443	0.5659	0.7358	0.7359	0.692	0.709	0.6852	0.0544	0.5733	0.8127	0.635	0.666	0.0172	0.6393	0.9807	0.2319	0.231	0.0148	0.0621	0.8017	0.0471	0.0437	0.9834	0.7127	0.8592	1	0.8799	0.6837	0.654	0.6411	0.0659	0.6523	0.6523	0.922	0.4428	0.5598	0.7681	0.3007
Platybelone araglus	1	1	1	1	1	1	1	1	1	1	1	1	1	1	1	1	1	1	1	1	1	1	1	1	1	1	1	1	1	1	1	1	1	1	1	1	1	1	1	1	1	1	1	1	1	1	1	1	1
Pomacanthus arcuatus	0.7318	0.7602	0.6331	0.2175	0.4197	0.6944	0.4481	0.9882	0.4462	0.8074	0.5965	0.2982	0.6524	0.9576	0.9574	0.4797	0.3874	0.9236	0.3038	0.3181	0.4958	0.2694	0.308	0.08	0.2515	0.7744	0.8154	0.8173	0.4955	0.2668	0.2609	0.2667	0.2997	0.821	0.3314	0.7533	0.4827	0.5097	0.4811	0.3393	0.7129	0.1888	0.6729	0.6729	0.8098	0.1551	0.1751	0.7001	0.0399
Pseudupeneus maculatus	0.5834	0.6083	0.5867	0.9403	0.5093	0.3104	0.8832	0.4711	0.7891	0.7424	0.2994	0.4453	0.3161	0.816	0.8158	0.4261	0.5386	0.8933	0.921	0.7122	0.97	0.4924	0.4229	0.5609	0.2665	0.9834	0.8521	0.8539	0.6318	0.4198	0.4208	0.5575	0.2859	0.4094	0.0414	0.0803	0.0694	0.6621	0.0837	0.0447	0.1071	0.0572	0.0985	0.0985	0.0214	0.3982	0.0243	0.0279	0.8696
Pterois volitans	0.6664	0.7385	0.0469	0.0002	0.5914	0.417	0.5866	0.6754	0.5485	0.8341	0.3255	0.6443	0.5659	0.7358	0.7359	0.692	0.709	0.6852	0.0544	0.5733	0.8127	0.635	0.666	0.0172	0.6393	0.9807	0.2319	0.231	0.0148	0.0621	0.8017	0.0471	0.0437	0.9834	0.7127	0.8592	1	0.8799	0.6837	0.654	0.6411	0.0659	0.6523	0.6523	0.922	0.4428	0.5598	0.7681	0.3007
Scarus iseri	0.845	0.9012	0.2987	0.6077	0.4247	0.1264	0.8169	0.7983	0.8129	0.6074	0.7407	0.4147	0.2812	0.9742	0.974	0.7206	0.4829	0.2029	0.7881	0.7899	0.7986	0.993	0.7369	0.9001	0.1809	0.0921	0.9911	0.9818	0.8521	0.4372	0.4818	0.3215	0.8437	0.0392	0.32	0.1531	0.1488	0.0088	0.9407	0.5453	0.1267	0.983	0.082	0.082	0.3952	0.22	0.9039	0.9701	0.6807
Scomberomorus regalis	0.8336	0.9529	0.3305	0.0923	0.3235	0.0675	0.8805	0.4469	0.8131	0.8851	0.7699	0.3998	0.2887	0.9846	0.9844	0.2326	0.512	0.8539	0.3822	0.2986	0.5508	0.386	0.4594	0.0103	0.3173	0.9239	0.3766	0.3753	0.1763	0.3996	0.5288	0.0129	0.4766	0.4139	0.3105	0.2957	0.4322	0.4734	0.2995	0.0666	0.1044	0.0039	0.1029	0.1029	0.4742	0.2985	0.4856	0.1853	0.4804
Serranus tigrinus	0.3262	0.9423	0.8607	0.5234	0.7227	0.2147	0.7281	0.8222	0.638	0.9434	0.2819	0.591	0.5999	0.7256	0.7257	0.1757	0.3963	0.8605	0.6748	0.4497	0.7833	0.624	0.754	0.1022	0.3234	0.4774	0.3773	0.3796	0.6414	0.9641	0.8611	0.3519	0.8642	0.97	0.148	0.2568	0.355	0.9535	0.1321	0.0287	0.1143	0.0287	0.1224	0.1224	0.1578	0.3309	0.3408	0.0157	0.7351
Serranus tortugarum	0.3064	0.0013	0.4385	0.909	0.528	0.2592	0.027	0.0109	0.0332	0.0432	0.9675	0.5813	0.4622	0.0913	0.0914	0.8085	0.6268	0.5323	0.3216	0.4296	0.1181	0.5519	0.5354	0.8937	0.36	0.9045	0.6209	0.6192	0.2879	0.6867	0.9873	0.9701	0.7777	0.9064	0.6514	0.2621	0.419	0.7491	0.9276	0.8253	0.387	0.6744	0.6166	0.6166	0.395	0.8553	0.7917	0.8005	0.5007
Sparisoma aurofrenatum	0.7726	0.7297	0.3684	0.5205	0.0225	0.4419	0.5243	0.7996	0.6765	0.7656	0.86	0.1542	0.354	0.4729	0.4727	0.9458	0.9194	0.1639	0.5251	0.7079	0.5598	0.7865	0.9197	0.7546	0.6112	0.9565	0.1214	0.1229	0.5968	0.4526	0.0454	0.4603	0.6357	0.1213	0.8819	0.4519	0.4007	0.593	0.9152	0.5661	0.7119	0.4272	0.9049	0.9049	0.8078	0.7867	0.4789	0.637	0.7177
Sparisoma viride	0.4086	0.0805	0.1274	0.7142	0.5701	0.2321	0.2501	0.1028	0.1889	0.0346	0.9512	0.4887	0.3948	0.1877	0.1878	0.9108	0.431	0.1659	0.5478	0.7631	0.1112	0.9714	0.652	0.6264	0.1785	0.3636	0.7262	0.7209	0.6822	0.7446	0.8483	0.9313	0.7063	0.5148	0.3451	0.1398	0.1833	0.263	0.8718	0.8587	0.251	0.5534	0.3298	0.3298	0.2381	0.4258	0.9342	0.6476	0.8183
Stegastes adustus	0.2758	0.637	0.5379	0.4038	0.6008	0.7278	0.474	0.5924	0.6007	0.4805	0.1001	0.6077	0.966	0.9825	0.9824	0.2363	0.8142	0.7403	0.3225	0.4891	0.3801	0.4812	0.4944	0.7515	0.9397	0.4052	0.7232	0.7276	0.4116	0.3984	0.5442	0.8869	0.2436	0.7596	0.6105	0.638	0.7863	0.5739	0.1658	0.1237	0.4161	0.4419	0.419	0.419	0.3369	0.8472	0.8977	0.0029	0.4117
Stegastes diencaeus	0.9042	0.7087	0.5804	0.6362	0.5914	0.305	0.5866	0.6754	0.6229	0.8667	0.8875	0.6443	0.5659	0.7389	0.7388	0.8488	0.709	0.3997	0.5376	0.5733	0.8127	0.635	0.8547	0.8877	0.5049	0.1582	0.9935	0.9861	0.8947	0.6401	0.6585	0.3635	0.8371	0.088	0.8895	0.5902	0.595	0.0294	0.5371	0.9115	0.4157	0.6743	0.3063	0.3063	0.922	0.4428	0.4619	0.7681	0.5586
Stegastes partitus	0.2724	0.0008	0.6224	0.4056	0.4756	0.1139	0.054	0.0483	0.0133	0.0031	0.9021	0.4559	0.2491	0.0304	0.0305	0.5913	0.4454	0.2659	0.0524	0.5238	0.0903	0.7786	0.8234	0.5731	0.1461	0.8631	0.3101	0.3081	0.1041	0.5266	0.9498	0.5654	0.9796	0.9756	0.1995	0.0762	0.1762	0.755	0.5416	0.4472	0.147	0.6105	0.2962	0.2962	0.0973	0.4599	0.4929	0.9847	0.6801
Stegastes planifrons	0.8105	0.4251	0.1908	0.186	0.9563	0.672	0.7794	0.39	0.2436	0.3487	0.6218	0.9207	0.4765	0.3534	0.3534	0.8315	0.5558	0.9	0.0815	0.1878	0.18	0.2891	0.3784	0.3829	0.9115	0.5766	0.8844	0.8884	0.2141	0.0191	0.9663	0.6796	0.145	0.4128	0.9131	0.7123	0.9021	0.6953	0.6247	0.8414	0.5008	0.9361	0.3769	0.3769	0.712	0.999	0.457	0.2355	0.6639
Stegastes variabilis	0.3293	0.0001	0.5804	0.7754	0.5914	0.4233	0.0149	0.0036	0.0153	0.0314	0.9387	0.6443	0.5659	0.0752	0.0752	0.9022	0.709	0.7035	0.2146	0.5733	0.0843	0.6834	0.4785	0.9056	0.4732	0.8679	0.6697	0.6694	0.2505	0.5527	0.9418	0.8561	0.7783	0.8082	0.7127	0.3574	0.5211	0.9039	1	0.9115	0.5651	0.7266	0.862	0.862	0.4202	0.9771	0.9428	0.7681	0.4212
Synodus intermedius	0.3651	0.6936	0.2698	0.7627	0.4552	0.2725	0.3464	0.8053	0.6704	0.2076	0.3496	0.3845	0.2502	0.6905	0.6907	0.5488	0.4804	0.7101	0.6739	0.662	0.3837	0.4043	0.6838	0.9278	0.1696	0.9108	0.8255	0.8279	0.731	0.4013	0.4676	0.875	0.1477	0.4953	0.0257	0.0228	0.0221	0.7028	0.1318	0.1001	0.0936	0.2421	0.1311	0.1311	0.0013	0.4606	0.027	0.1134	0.5429
Thalassoma bifasciatum	0.6226	0.5125	0.3638	0.3792	0.2959	0.1135	0.4162	0.6465	0.9118	0.9436	0.5449	0.6155	0.0116	0.8847	0.8846	0.9494	0.9889	0.9273	0.6227	0.0477	0.4314	0.0672	0.0645	0.6542	0.9004	0.7107	0.5641	0.563	0.284	0.8769	0.7393	0.2524	0.7175	0.2595	0.8937	0.2994	0.6737	0.8357	0.8963	0.5473	0.2378	0.2309	0.3274	0.3274	0.5668	0.7095	0.9023	0.5312	0.234
Abudefduf saxatilis 2	0.4983	0.3617	0.7912	0.3482	0.0858	0.0021	0.7728	0.5835	0.2309	0.2184	0.7239	0.0953	0.2076	0.5063	0.5066	0.3252	0.1923	0.256	0.2542	0.5391	0.3668	0.7773	0.7953	0.1825	0.0121	0.2188	0.6195	0.6116	0.161	0.5175	0.2416	0.0198	0.5264	0.07	0.1322	0.0433	0.0578	0.0077	0.732	0.1714	0.0209	0.3259	0.0273	0.0273	0.2792	0.0486	0.6088	0.804	0.3011
Acanthurus bahianus 2	0.8157	0.6094	0.2938	0.9122	0.8994	0.6294	0.8256	0.6628	0.5475	0.0355	0.6482	0.5857	0.5708	0.3443	0.3444	0.8945	0.4097	0.0389	0.2942	0.2926	0.1296	0.1	0.9413	0.8631	0.1635	0.1672	0.7249	0.7179	0.904	0.674	0.7744	0.8489	0.8644	0.7699	0.0881	0.2105	0.1353	0.3459	0.6978	0.9386	0.4281	0.9439	0.384	0.384	0.143	0.1398	0.0939	0.3999	0.5933
Acanthurus chirurgus 2	0.8847	0.6447	0.4932	0.5944	0.6852	0.3367	0.5005	0.6049	0.5599	0.9387	0.9415	0.6862	0.5542	0.773	0.7729	0.8843	0.6846	0.2802	0.545	0.6752	0.8356	0.7783	0.7814	0.831	0.4764	0.1207	0.9367	0.9288	0.8092	0.5263	0.7086	0.3983	0.8475	0.1031	0.7739	0.5505	0.5393	0.028	0.5875	0.9337	0.3995	0.6779	0.2737	0.2737	0.9692	0.3745	0.5859	0.7162	0.5367
Acanthurus coeruleus 2	0.3035	0.4487	0.0436	0.5103	0.3144	0.2663	0.6347	0.1996	0.2736	0.0572	0.4055	0.1934	0.6939	0.4835	0.4838	0.7182	0.2466	0.2781	0.7124	0.3952	0.0256	0.2078	0.2698	0.753	0.0289	0.124	0.5824	0.5897	0.8404	0.6306	0.2844	0.8127	0.6355	0.2145	0.1075	0.0819	0.0247	0.0421	0.8719	0.5161	0.2117	0.7162	0.2274	0.2274	0.1513	0.121	0.3739	0.944	0.5538
Anisotremus virginicus 2	0.5637	0.9136	0.0409	0.0161	0.6371	0.9948	0.3692	0.7282	0.6634	0.9735	0.4151	0.6867	0.8568	0.9571	0.957	0.9241	0.9295	0.8888	0.1196	0.5959	0.9017	0.6481	0.8364	0.0914	0.8399	0.8562	0.836	0.834	0.132	0.0469	0.589	0.2049	0.0489	0.8789	0.9721	0.717	0.8306	0.9733	0.8221	0.9754	0.7656	0.2537	0.7739	0.7739	0.5677	0.6056	0.4497	0.506	0.1882
Apogon townsendi 2	0.0923	0.4967	0.7895	0.7933	0.5036	0.6274	0.5076	0.4444	0.3761	0.9579	0.3903	0.42	0.2859	0.1116	0.1116	0.0591	0.502	0.5539	0.8227	0.5839	0.7667	0.3896	0.3908	0.1684	0.7833	0.4133	0.2877	0.2851	0.3277	0.1042	0.2666	0.3307	0.1064	0.4686	0.7803	0.7848	0.7459	0.7207	0.5269	0.5046	0.7934	0.7034	0.847	0.847	0.6122	0.7001	0.2778	0.8803	0.5431
Canthigaster rostrata 2	0.487	0.4801	0.9473	0.7124	0.0125	0.2937	0.8931	0.4956	0.5154	0.4398	0.6361	0.0418	0.2087	0.5565	0.5562	0.4296	0.3017	0.812	0.5814	0.9188	0.3913	0.9438	0.6663	0.7003	0.3503	0.6123	0.2969	0.3001	0.5656	0.9062	0.0333	0.5793	0.7692	0.0201	0.8596	0.3766	0.3543	0.1196	0.2358	0.7984	0.609	0.939	0.697	0.697	0.9418	0.7153	0.9869	0.5847	0.8135
Carangoides ruber 2	0.9107	0.502	0.4883	0.5849	0.9255	0.3847	0.4038	0.4075	0.411	0.9616	0.9794	0.8789	0.5551	0.8619	0.8619	0.8004	0.7908	0.1513	0.5593	0.8058	0.7612	0.9375	0.5602	0.8831	0.4883	0.0772	0.7695	0.7611	0.719	0.4415	0.8976	0.3814	0.7997	0.1687	0.6183	0.5144	0.4976	0.0438	0.833	0.8576	0.3623	0.7923	0.219	0.219	0.8018	0.3177	0.814	0.7301	0.5579
Cephalopholis cruentata 2	0.1725	0.8199	0.2454	0.6457	0.214	0.493	0.8341	0.9785	0.9357	0.5083	0.61	0.3955	0.9833	0.0958	0.0958	0.2003	0.9835	0.0086	0.9686	0.668	0.9151	0.84	0.6694	0.6617	0.4717	0.2997	0.0601	0.0588	0.9801	0.6498	0.1457	0.6572	0.6731	0.5952	0.283	0.45	0.5467	0.6104	0.2738	0.4183	0.2483	0.9694	0.1846	0.1846	0.2738	0.2726	0.9035	0.8786	0.8608
Chaetodon capistratus 2	0.0674	0.196	0.9665	0.6876	0.5556	0.4782	0.1019	0.4492	0.3073	0.1129	0.6487	0.4827	0.886	0.0071	0.0071	0.105	0.4519	0.2598	0.2223	0.828	0.2871	0.8225	0.7784	0.3183	0.4866	0.4096	0.2628	0.259	0.387	0.361	0.3004	0.5062	0.6552	0.3847	0.2878	0.307	0.3858	0.8007	0.0186	0.2127	0.3392	0.6048	0.4781	0.4781	0.1475	0.7312	0.3105	0.8345	0.4923
Chaetodon ocellatus 2	0.7425	0.3677	0.9019	0.401	0.0485	0.3382	0.8838	0.3086	0.2156	0.8051	0.8878	0.0634	0.5853	0.6911	0.6908	0.6963	0.1519	0.5592	0.5579	0.3776	0.6516	0.4539	0.2856	0.7251	0.4569	0.623	0.71	0.7082	0.2745	0.5183	0.1245	0.5701	0.8602	0.2471	0.8938	0.7518	0.8056	0.3686	0.1996	0.942	0.7323	0.8508	0.8391	0.8391	0.6798	0.6644	0.5293	0.9562	0.4171
Chaetodon striatus 2	0.5274	0.1269	0.3156	0.9641	0.575	0.6802	0.3302	0.0997	0.1271	0.0026	0.8981	0.4365	0.6126	0.2241	0.2243	0.8551	0.5057	0.4011	0.1847	0.2928	0.0088	0.1411	0.5109	0.6883	0.2146	0.5298	0.8308	0.8351	0.7577	0.9724	0.6033	0.7598	0.6693	0.9344	0.1882	0.1928	0.1364	0.7439	0.7037	0.9028	0.5719	0.9006	0.7229	0.7229	0.127	0.5003	0.1311	0.6009	0.8348
Coryphopterus glaucofraenum 2	0.4489	0.1356	0.5156	0.5949	0.1436	0.0027	0.3282	0.3903	0.2105	0.0641	0.863	0.1703	0.0669	0.3072	0.3074	0.4767	0.2788	0.1837	0.2609	0.4378	0.2723	0.7129	0.8934	0.5287	0.0285	0.2999	0.5546	0.5475	0.2432	0.8615	0.4173	0.1364	0.9803	0.1158	0.1082	0.0084	0.032	0.0591	0.6837	0.2371	0.012	0.4813	0.0283	0.0283	0.0922	0.169	0.5598	0.8137	0.9321
Coryphopterus personatus 2	0.3343	0.5535	0.8247	0.4546	0.1718	0.0065	0.3827	0.9886	0.467	0.3934	0.3497	0.1994	0.0894	0.6471	0.6473	0.1752	0.3178	0.6748	0.3822	0.4646	0.7672	0.7128	0.5394	0.1378	0.063	0.9716	0.605	0.6022	0.4222	0.9358	0.3676	0.1015	0.6473	0.2431	0.0283	0.0065	0.0281	0.3579	0.1089	0.0035	0.0021	0.0115	0.0078	0.0078	0.0146	0.2263	0.1474	0.0314	0.9699
Elacatinus xanthiprora 2	0.5391	0.5689	0.3943	0.4685	0.4087	0.0946	0.9119	0.5222	0.5918	0.6527	0.1477	0.4795	0.3756	0.612	0.6119	0.3035	0.5842	0.8524	0.3398	0.3851	0.5795	0.4668	0.6215	0.7392	0.3295	0.6127	0.9049	0.9088	0.6128	0.3791	0.5003	0.318	0.4274	0.0614	0.4025	0.1937	0.2369	0.1002	0.6434	0.1104	0.0729	0.5275	0.0495	0.0495	0.3784	0.4484	0.9135	0.0741	0.9334
Equetus punctatus 2	0.7823	0.7087	0.5804	0.9267	0.8833	0.9805	0.5866	0.6754	0.7772	0.2915	0.7168	0.6798	0.5659	0.9956	0.9956	0.6958	0.709	0.3775	0.6008	0.1052	0.4316	0.0303	0.64	0.6928	0.4654	0.3654	0.7144	0.7196	0.5904	0.4406	0.5754	0.9388	0.7027	0.6854	0.1648	0.3574	0.2163	0.6701	0.5371	0.9115	0.6943	0.6683	0.6126	0.6126	0.1861	0.4428	0.0186	0.7681	0.9183
Haemulon flavolineatum 2	0.4541	0.6922	0.5142	0.7159	0.9993	0.4253	0.8928	0.6191	0.3869	0.9748	0.5733	0.697	0.8055	0.578	0.5781	0.4639	0.2239	0.5003	0.916	0.2122	0.9064	0.3216	0.4522	0.331	0.4481	0.6737	0.2192	0.2214	0.5242	0.8679	0.8434	0.5994	0.5381	0.8557	0.667	0.8415	0.9528	0.613	0.8912	0.5544	0.4543	0.7375	0.407	0.407	0.944	0.248	0.5203	0.5797	0.2049
Haemulon macrostomum 2	0.9042	0.7087	0.5804	0.6362	0.5914	0.305	0.5866	0.6754	0.6229	0.8667	0.8875	0.6443	0.5659	0.7389	0.7388	0.8488	0.709	0.3997	0.5376	0.5733	0.8127	0.635	0.8547	0.8877	0.5049	0.1582	0.9935	0.9861	0.8947	0.6401	0.6585	0.3635	0.8371	0.088	0.8895	0.5902	0.595	0.0294	0.5371	0.9115	0.4157	0.6743	0.3063	0.3063	0.922	0.4428	0.4619	0.7681	0.5586
Haemulon plumierii 2	0.2856	0.8716	0.4355	0.8056	0.3492	0.1312	0.5135	0.8032	0.9159	0.8091	0.0801	0.3414	0.3494	0.9254	0.9252	0.2151	0.4538	0.9255	0.917	0.8639	0.9314	0.9377	0.697	0.4578	0.1853	0.8938	0.8528	0.8537	0.7379	0.5173	0.3864	0.471	0.2238	0.3032	0.067	0.0529	0.0601	0.5054	0.11	0.007	0.0421	0.09	0.0512	0.0512	0.031	0.4031	0.1747	0.0007	0.8547
Haemulon sciurus 2	0.817	0.5916	0.5826	0.9959	0.6906	0.985	0.4831	0.6891	0.8602	0.354	0.9184	0.4711	0.6803	0.8209	0.8208	0.7488	0.5308	0.5601	0.5937	0.0557	0.3853	0.0094	0.88	0.8451	0.3654	0.454	0.5268	0.5308	0.5626	0.4961	0.3492	0.9845	0.694	0.6072	0.1242	0.3576	0.1739	0.6084	0.5131	0.7676	0.6921	0.5174	0.6044	0.6044	0.192	0.3383	0.0051	0.9745	0.6623
Halichoeres bivittatus 2	0.803	0.8544	0.4501	0.5207	0.782	0.246	0.8829	0.707	0.6359	0.7807	0.8048	0.8499	0.4468	0.8852	0.8852	0.6353	0.9267	0.1941	0.6507	0.7417	0.9793	0.8377	0.6095	0.8606	0.4077	0.0604	0.8479	0.8383	0.8301	0.5535	0.8907	0.3659	0.9774	0.1396	0.5872	0.3367	0.3551	0.0437	0.9896	0.6875	0.2539	0.7335	0.1859	0.1859	0.6259	0.4238	0.7957	0.8353	0.8831
Holacanthus ciliaris 2	0.444	0.6051	0.6386	0.5145	0.2471	0.5318	0.8298	0.2341	0.0934	0.1617	0.5518	0.1264	0.6863	0.5908	0.5911	0.6178	0.2088	0.6617	0.2087	0.1439	0.0219	0.0789	0.036	0.3715	0.0457	0.2946	0.5768	0.5819	0.5298	0.3636	0.1498	0.4528	0.4386	0.57	0.2002	0.4224	0.1687	0.1558	0.7788	0.5251	0.5885	0.7437	0.6104	0.6104	0.5771	0.0597	0.1992	0.7732	0.041
Hypoplectrus nigricans 2	0.3039	0.164	0.5571	0.7818	0.3267	0.0437	0.0841	0.4103	0.2651	0.4702	0.4269	0.3755	0.1634	0.4888	0.489	0.3875	0.3646	0.9149	0.6532	0.0704	0.8564	0.1556	0.7915	0.5116	0.2954	0.4408	0.4718	0.4737	0.4326	0.9211	0.7593	0.5327	0.3874	0.5558	0.3165	0.088	0.264	0.7842	0.5298	0.1172	0.0517	0.2744	0.1177	0.1177	0.1308	0.6971	0.9289	0.0725	0.5071
Hypoplectrus puella 2	0.1692	0.5623	0.1645	0.3811	0.6313	0.0641	0.1975	0.7383	0.8158	0.4412	0.2028	0.708	0.2661	0.4731	0.4732	0.2352	0.7772	0.3914	0.7527	0.4667	0.7035	0.6117	0.6429	0.9796	0.2131	0.4271	0.7705	0.7649	0.8262	0.4324	0.9289	0.5346	0.309	0.2606	0.2087	0.0424	0.0893	0.2255	0.3551	0.1122	0.0294	0.8041	0.0423	0.0423	0.0713	0.5194	0.8404	0.207	0.4803
Lucayablennius zingaro 2	0.3293	0.0001	0.5804	0.7754	0.5914	0.4233	0.0149	0.0036	0.0153	0.0314	0.9387	0.6443	0.5659	0.0752	0.0752	0.9022	0.709	0.7035	0.2146	0.5733	0.0843	0.6834	0.4785	0.9056	0.4732	0.8679	0.6697	0.6694	0.2505	0.5527	0.9418	0.8561	0.7783	0.8082	0.7127	0.3574	0.5211	0.9039	1	0.9115	0.5651	0.7266	0.862	0.862	0.4202	0.9771	0.9428	0.7681	0.4212
Lutjanus griseus 2	0.8368	0.8635	0.1186	0.0088	0.5618	0.6505	0.4507	0.9466	0.4006	0.8766	0.5929	0.5367	0.8956	0.8165	0.8166	0.6715	0.6071	0.8848	0.0971	0.9643	0.8567	0.9489	0.6543	0.0257	0.5567	0.9108	0.5349	0.5337	0.0574	0.0386	0.6078	0.1107	0.0278	0.9245	0.7845	0.909	0.9663	0.7508	0.8192	0.7325	0.9062	0.197	0.8986	0.8986	0.6869	0.3379	0.5939	0.6852	0.0806
Malacoctenus triangulatus 2	0.7639	0.5689	0.3943	0.6694	0.6047	0.4598	0.4024	0.5222	0.5552	0.5198	0.8682	0.5037	0.3756	0.7983	0.7982	0.881	0.5694	0.1706	0.9463	0.4927	0.6875	0.3006	0.6215	0.6846	0.2761	0.0552	0.7874	0.7969	0.6118	0.339	0.442	0.5391	0.8953	0.1065	0.2577	0.2563	0.1669	0.0491	1	0.8665	0.3537	0.9951	0.2344	0.2344	0.3784	0.228	0.3678	0.654	0.6036
Microspathodon chrysurus 2	0.7087	0.4228	0.9862	0.4586	0.0059	0.0223	0.4683	0.6257	0.3388	0.1762	0.6727	0.0319	0.0852	0.9223	0.9226	0.5878	0.3423	0.9113	0.2446	0.9024	0.2372	0.7039	0.9895	0.4422	0.0397	0.4012	0.552	0.5592	0.3821	0.6638	0.035	0.1159	0.7493	0.0203	0.1184	0.0148	0.0128	0.0808	0.5343	0.1467	0.0579	0.1972	0.1073	0.1073	0.1262	0.2961	0.1612	0.5084	0.8917
Pomacanthus arcuatus 2	0.6945	0.6835	0.7891	0.2936	0.3892	0.619	0.4719	0.9042	0.5325	0.7162	0.517	0.2585	0.8133	0.9241	0.9239	0.4594	0.3497	0.9963	0.3288	0.2454	0.4706	0.1737	0.4334	0.1069	0.185	0.726	0.7561	0.7585	0.6468	0.4385	0.2148	0.2817	0.4802	0.7089	0.1797	0.5397	0.2997	0.4698	0.3362	0.2337	0.5511	0.1239	0.5067	0.5067	0.5279	0.1225	0.0629	0.53	0.0717
Pseudupeneus maculatus 2	0.6712	0.6387	0.7478	0.8121	0.4758	0.2834	0.9921	0.4344	0.8455	0.6613	0.4342	0.4076	0.2748	0.8639	0.8637	0.4448	0.503	0.7899	0.7058	0.6822	0.9391	0.4491	0.3867	0.4313	0.2314	0.9195	0.9586	0.9611	0.8191	0.5541	0.3948	0.4271	0.4411	0.4171	0.0297	0.0755	0.0654	0.6353	0.0773	0.0503	0.1022	0.0276	0.0918	0.0918	0.0222	0.3225	0.0093	0.0602	0.9962
Scarus iseri 2	0.5447	0.8693	0.1914	0.6667	0.4038	0.054	0.9223	0.9795	0.9242	0.3344	0.5748	0.3539	0.211	0.7202	0.7204	0.5055	0.3805	0.1165	0.9807	0.8311	0.5689	0.8761	0.7428	0.9257	0.0664	0.0955	0.8335	0.8241	0.9468	0.4412	0.4961	0.2771	0.7501	0.0603	0.1068	0.0378	0.0394	0.0108	0.6963	0.2883	0.0334	0.773	0.0204	0.0204	0.1271	0.1196	0.5672	0.7286	0.7361
Scomberomorus regalis 2	0.7822	0.8622	0.4988	0.202	0.2818	0.0358	0.8718	0.4087	0.9301	0.8294	0.6239	0.3599	0.2468	0.9007	0.9005	0.2047	0.4768	0.7929	0.5674	0.2567	0.5176	0.3456	0.4459	0.0264	0.2605	0.9207	0.4413	0.4391	0.2771	0.5697	0.475	0.0104	0.5991	0.2455	0.2867	0.2268	0.3445	0.2883	0.3414	0.0494	0.0596	0.0127	0.0519	0.0519	0.4363	0.2569	0.5857	0.1448	0.4863
Serranus tigrinus 2	0.4395	0.8388	0.5077	0.5918	0.7615	0.3656	0.8973	0.9374	0.4821	0.6743	0.4471	0.4529	0.661	0.704	0.7041	0.446	0.1587	0.6858	0.5849	0.6411	0.9455	0.9581	0.9935	0.2732	0.2703	0.3734	0.3986	0.4023	0.7666	0.7586	0.7843	0.6914	0.751	0.8856	0.0953	0.2734	0.3305	0.9773	0.2968	0.1315	0.1885	0.0785	0.1861	0.1861	0.1221	0.228	0.2362	0.0741	0.5736
Serranus tortugarum 2	0.2315	0.0201	0.2591	0.8571	0.6628	0.1685	0.0558	0.0577	0.1071	0.1132	0.7491	0.6709	0.4347	0.111	0.111	0.6165	0.5724	0.3616	0.5842	0.2494	0.2743	0.371	0.6968	0.9238	0.3187	0.8322	0.4462	0.4446	0.4368	0.9784	0.8408	0.8742	0.7103	0.7985	0.558	0.2099	0.3809	0.5695	1	0.6414	0.2269	0.7029	0.3607	0.3607	0.3272	0.6974	0.6452	0.9428	0.5623
Sparisoma aurofrenatum 2	0.6006	0.9172	0.1314	0.406	0.1055	0.6185	0.5559	0.8282	0.9827	0.7863	0.9993	0.3856	0.3665	0.3626	0.3625	0.9396	0.7937	0.0675	0.6486	0.9446	0.8789	0.7916	0.6675	0.6407	0.9292	0.5869	0.2596	0.2597	0.5731	0.4283	0.1805	0.5107	0.6503	0.3157	0.8216	0.7336	0.7922	0.8948	0.8272	0.5978	0.895	0.2732	0.913	0.913	0.9878	0.4436	0.6504	0.4507	0.4731
Sparisoma viride 2	0.3932	0.2337	0.023	0.3449	0.7191	0.3812	0.3609	0.1639	0.3589	0.089	0.7191	0.548	0.5463	0.3246	0.3248	0.9818	0.3987	0.2007	0.9341	0.9435	0.1541	0.7775	0.6012	0.3806	0.2212	0.4083	0.926	0.9216	0.8268	0.3678	0.8593	0.7513	0.43	0.5256	0.3291	0.1776	0.1858	0.2787	0.8417	0.8872	0.31	0.4152	0.3522	0.3522	0.2175	0.4356	0.9237	0.8243	0.824
Stegastes adustus 2	0.3109	0.7104	0.5105	0.2439	0.3261	0.813	0.3649	0.7401	0.5623	0.5126	0.1684	0.3302	0.7872	0.8904	0.8903	0.4088	0.5255	0.6367	0.2627	0.6912	0.4529	0.6222	0.5414	0.8605	0.5909	0.3255	0.8303	0.836	0.2673	0.3458	0.3142	0.4408	0.172	0.407	0.8826	0.934	0.9296	0.2489	0.2215	0.3413	0.7948	0.8025	0.8279	0.8279	0.4641	0.4899	0.9973	0.0351	0.1965
Stegastes diencaeus 2	0.9042	0.7087	0.5804	0.6362	0.5914	0.305	0.5866	0.6754	0.6229	0.8667	0.8875	0.6443	0.5659	0.7389	0.7388	0.8488	0.709	0.3997	0.5376	0.5733	0.8127	0.635	0.8547	0.8877	0.5049	0.1582	0.9935	0.9861	0.8947	0.6401	0.6585	0.3635	0.8371	0.088	0.8895	0.5902	0.595	0.0294	0.5371	0.9115	0.4157	0.6743	0.3063	0.3063	0.922	0.4428	0.4619	0.7681	0.5586
Stegastes partitus 2	0.1214	0.0307	0.5714	0.3957	0.5534	0.0394	0.114	0.1894	0.0436	0.0071	0.7487	0.4901	0.2512	0.0202	0.0202	0.2258	0.4368	0.1254	0.0622	0.6314	0.1337	0.9306	0.9972	0.2574	0.0471	0.5946	0.2019	0.1991	0.14	0.5629	0.9801	0.272	0.8615	0.8897	0.0384	0.0178	0.0565	0.5292	0.1652	0.1194	0.0275	0.2896	0.0743	0.0743	0.0163	0.192	0.2275	0.6403	0.9151
Stegastes planifrons 2	0.7968	0.4358	0.1276	0.1226	0.8557	0.8152	0.7957	0.44	0.2358	0.4071	0.6598	0.9842	0.5246	0.3739	0.374	0.7164	0.576	0.8722	0.0696	0.2676	0.2283	0.3955	0.4024	0.2498	0.8555	0.5678	0.942	0.9463	0.1441	0.0061	0.9092	0.493	0.0992	0.4948	0.9171	0.7475	0.916	0.7889	0.5925	0.9644	0.5902	0.7978	0.4572	0.4572	0.6809	0.9401	0.498	0.2912	0.5873
Synodus intermedius 2	0.3118	0.4817	0.2534	0.8026	0.4273	0.2401	0.2278	0.5968	0.4959	0.1295	0.3777	0.3673	0.2338	0.5466	0.5467	0.5538	0.4652	0.6821	0.5698	0.7333	0.2846	0.461	0.7693	0.9438	0.152	0.9326	0.8786	0.881	0.8581	0.4743	0.4936	0.8999	0.1535	0.5369	0.0289	0.0174	0.0207	0.7272	0.1522	0.1139	0.0886	0.2894	0.1426	0.1426	0.0009	0.4827	0.04	0.1478	0.4859
Thalassoma bifasciatum 2	0.6627	0.5357	0.4357	0.2587	0.1478	0.0371	0.6097	0.6906	0.9083	0.9008	0.6364	0.336	0.0113	0.8418	0.8417	0.8469	0.6127	0.9425	0.5244	0.0397	0.5132	0.0774	0.1655	0.4286	0.5732	0.8198	0.5323	0.5307	0.191	0.7877	0.4843	0.11	0.9224	0.1299	0.6955	0.2146	0.508	0.4787	0.9808	0.4226	0.1307	0.1491	0.1779	0.1779	0.5505	0.875	0.9456	0.498	0.6151
[truncated: 121 more columns]

## Sheet: Dataset Corr matrix
Site	Hard coral reef	Hard coral bleached	Recently killed coral	Anemone	Soft coral reef	Sponges	Worms	Zoanthid	Rubble	Sand reef	Rock	Calcifying algae reef	Macroalgae reef	Soft Substrate	Hard substrate	Thalassia	Syringodium	Sand seagrass	Hard coral seagrass	Soft coral seagrass	Sponge seagrass	Macroalgae seagrass	Calcifying algae seagrass	Seagrass Biomass (g/m2)	Distance Reef-Mangrove (m)	Temp °C reef	Sal psu reef	TDS mg/L reef	ODO mg/L reef	pH reef	Turbidity FNU reef	Chlorophyll µg/L reef	BGA-PE µg/L reef	fDOM RFU reef	Reef Biodiversity M1	Reef Biodiversity M2	Mangrove M1	Mangrove M2	Seagrass M1	Seagrass M2	Trophic level (Fish Base)	Trophic level Avg all species	Vulnerability (Fish Base)	Vulnerability (Fish Base)/10	Resilience high (No of species, Fish Base)	Resilience medium	Resilience low	Resilience very low	Resilience high %
Punta Caracol	41.5	0	0	0.5	2.5	9.5	0	0	4	19	22.5	0.5	0	36	64	45.2	0	37.4	1.4	0.4	1.4	14.2	0	34.6581	65	29.3171	32.505	32401	6.3625	8.15375	0.07125	0.8125	1.39875	0.80375	38	16	21	5	12	5	43.4972	3.16842	410.707	41.0707	19	15	4	0	50
Casa Blanca	2.5	1.5	0	1	0	17.5	1	1	20	26.5	29	0	0	67	33	58.8	0	29.6	2.2	0	2	0.8	6.6	43.6368	70	29.0729	33.4359	33217.1	4.44215	8.06092	0.446769	0.780462	1.44215	0.582462	30	16	16	3	9	5	46.5129	3.04333	361.26	36.126	17	12	1	0	56.6667
Almirante	36.5	0	0	0	0	19.5	0	0	2.5	7.5	34	0	0	29.5	70.5	60.6	0	36.8	0	0	0.6	0.4	1.6	42.8963	90	29.4158	32.9449	32792.5	5.88781	8.13374	0.13981	1.10479	1.6559	1.1816	28	14	15	10	6	5	50.3295	3.03214	482.629	48.2629	13	15	0	0	46.4286
Stri Point	3	0	0	0	0	19.5	0.5	0	4.5	5	67.5	0	0	29.5	70.5	85	0.2	14	0	0	0.4	0.4	0	66.5285	120	28.9638	32.739	32597.5	6.36054	8.14749	0.141392	0.955032	1.02634	0.880122	35	17	19	4	15	10	58.5804	3.3	520.296	52.0296	19	13	2	1	54.2857
Juan-Point	46.4	0.4	1.2	3.6	0	17.6	0	0	10.4	11.2	9.2	0	0	42.8	57.2	66	0	30	2.8	0	0.6	0.4	0.2	109.17	170	29.1062	34.262	33949	3.466	7.99	0.2525	1.3505	2.311	0.6585	30	12	10	4	11	6	44.7155	3.35667	402.536	40.2536	13	15	2	0	43.3333
Coral-Cay	16	0	0	0	2.5	2	0	0.5	10.5	8	52.5	0.5	7.5	31.5	68.5	58.2	0	13.4	0.4	0.4	1.6	11.2	14.8	46.7386	230	29.191	31.542	31542.2	6.366	8.072	0.008	0.688	1.734	0.602	25	7	9	5	7	4	22.8791	2.964	220.736	22.0736	10	14	1	0	40
Popa	26.94	0	0	0	16.11	1.11	0	0	2.22	4.17	24.44	20.28	4.72	48.61	51.38	56.79	4.77	40.16	0	0	0.08	0.16	0.57	40.4627	700	29.0123	34.7027	34329.4	6.25649	8.14606	1.50816	0.600681	1.75324	0.109896	24	6	0	0	9	3	28.5096	3.00833	294.303	29.4303	12	12	0	0	50
Salt-Creek	24.76	0	0.95	0	10	0.48	0.48	0	0	0.95	35.71	21.9	4.76	38.57	61.42	69.2	19.2	9	0	0.2	0.4	2	0	43.5963	950	29.2153	32.4117	32315.3	6.09333	8.045	1.05833	0.785	1.68167	0.4	15	5	0	0	12	4	19.2973	2.98	162.958	16.2958	9	6	0	0	60
Hospital-Point	96	0	0.5	0.5	0	0.5	0	0	0.5	0	2	0	0	1.5	98.5	0	0	0	0	0	0	0	0	0	900	28.7131	31.875	31824	6.34	8.165	0	0.4475	1.0875	0.7725	16	6	0	0	0	0	17.083	3.04375	159.62	15.962	9	7	0	0	56.25
[truncated: 123 more columns]
